# Supplementary material
Source: publisher figshare collection journal article supplement (https://diabetesjournals.figshare.com/ndownloader/files/25532630)
Supplement: Supplementary file 1 [file 25532630]

## Sheet: Supp Table 1
Table S1
Differentially (p<0.01, |F.C| > 1.5) expressed genes found by microarray
		gene name	p-value	linear fold change (bfurKO/control)	log2 controls		linear control		log2 bfurKO		linear bfurKO		log2 values controls				log2 values bfurKO				linear controls				linear bfurKO
					average	stdev	average	stdev	average	stdev	average	stdev	control 1	control 2	control 3	control 4	bfurKO 1	bfurKO 2	bfurKO 3	bfurKO 4	control 1	control 2	control 3	control 4	bfurKO 1	bfurKO 2	bfurKO 3	bfurKO 4
NM_007515 // Slc7a3 // solute carrier family 7 (cationic amino acid transporter, y+ system), member 3 // X C3|X // 11989 /// ENSMUST00000101362 // Slc7a3 // solute carrier family 7 (cationic amino acid transporter, y+ system), member 3 // X C3|X // 11989 /// ENSMUST00000113710 // Slc7a3 // solute carrier family 7 (cationic amino acid transporter, y+ system), member 3 // X C3|X // 11989 /// ENSMUS…	NM_007515 // RefSeq // Mus musculus solute carrier family 7 (cationic amino acid transporter, y+ system), member 3 (Slc7a3), mRNA. // chrX // 100 // 100 // 24 // 24 // 0 /// ENSMUST00000101362 // ENSEMBL // Cationic amino acid transporter 3 gene:ENSMUSG00000031297 // chrX // 100 // 100 // 24 // 24 // 0 /// ENSMUST00000113710 // ENSEMBL // Cationic amino acid transporter 3 gene:ENSMUSG00000031297 …	Slc7a3	9.18903e-06	13.0709	4.78601	0.170326	27.7389	3.45653	8.43618	0.502741	362.571	126.871	4.67548	4.71595	5.04002	4.71261	8.14195	7.91518	9.02809	8.65951	25.554	26.2811	32.9001	26.2202	282.468	241.383	522.067	404.363
NM_011990 // Slc7a11 // solute carrier family 7 (cationic amino acid transporter, y+ system), member 11 // 3 D|3 16.4 cM // 26570 /// ENSMUST00000029297 // Slc7a11 // solute carrier family 7 (cationic amino acid transporter, y+ system), member 11 // 3 D|3 16.4 cM // 26570 /// AY766236 // Slc7a11 // solute carrier family 7 (cationic amino acid transporter, y+ system), member 11 // 3 D|3 16.4 cM //…	NM_011990 // RefSeq // Mus musculus solute carrier family 7 (cationic amino acid transporter, y+ system), member 11 (Slc7a11), mRNA. // chr3 // 100 // 100 // 25 // 25 // 0 /// ENSMUST00000029297 // ENSEMBL // Cystine/glutamate transporter gene:ENSMUSG00000027737 // chr3 // 100 // 100 // 25 // 25 // 0 /// AY766236 // GenBank // Mus musculus cysteine/glutamate transporter (Slc7a11) mRNA, complete c…	Slc7a11	0.000392377	8.61179	3.69988	0.170606	13.0653	1.61111	6.64958	0.813316	112.515	58.389	3.62459	3.94449	3.55406	3.67639	5.81545	6.08927	7.38225	7.31134	12.3342	15.3961	11.7457	12.7851	56.3151	68.0852	166.832	158.83
NM_146879 // Olfr330 // olfactory receptor 330 // 11 B1|11 // 258879 /// ENSMUST00000062869 // Olfr330 // olfactory receptor 330 // 11 B1|11 // 258879 /// BC120838 // Olfr330 // olfactory receptor 330 // 11 B1|11 // 258879	NM_146879 // RefSeq // Mus musculus olfactory receptor 330 (Olfr330), mRNA. // chr11 // 100 // 100 // 16 // 16 // 0 /// ENSMUST00000062869 // ENSEMBL // olfactory receptor 330 gene:ENSMUSG00000050818 // chr11 // 100 // 100 // 16 // 16 // 0 /// BC120838 // GenBank // Mus musculus olfactory receptor 330, mRNA (cDNA clone MGC:156075 IMAGE:40129761), complete cds. // chr11 // 100 // 100 // 16 // 16 /…	Olfr330	1.95162e-05	6.92207	4.15256	0.16447	17.869	1.94888	6.9012	0.424206	123.691	39.3771	3.91796	4.25947	4.27355	4.15927	6.5937	6.59188	7.49191	6.92732	15.1155	19.1526	19.3404	17.8676	96.5832	96.4611	180.007	121.711
NM_053080 // Aldh1a3 // aldehyde dehydrogenase family 1, subfamily A3 // 7 C|7 // 56847 /// ENSMUST00000015278 // Aldh1a3 // aldehyde dehydrogenase family 1, subfamily A3 // 7 C|7 // 56847 /// BC058277 // Aldh1a3 // aldehyde dehydrogenase family 1, subfamily A3 // 7 C|7 // 56847	NM_053080 // RefSeq // Mus musculus aldehyde dehydrogenase family 1, subfamily A3 (Aldh1a3), mRNA. // chr7 // 100 // 94 // 30 // 30 // 0 /// ENSMUST00000015278 // ENSEMBL // Aldehyde dehydrogenase family 1 member A3 gene:ENSMUSG00000015134 // chr7 // 100 // 94 // 30 // 30 // 0 /// BC058277 // GenBank // Mus musculus aldehyde dehydrogenase family 1, subfamily A3, mRNA (cDNA clone MGC:67939 IMAGE:6…	Aldh1a3	0.00093605	6.60272	6.24305	0.507552	78.9516	23.4085	8.88607	0.713968	521.296	279.423	5.49724	6.36857	6.48818	6.61822	8.52579	8.19933	8.97386	9.8453	45.1683	82.6285	89.771	98.2387	368.567	293.929	502.808	919.878
NM_008051 // Fut1 // fucosyltransferase 1 // 7 B4|7 23.2 cM // 14343 /// ENSMUST00000008605 // Fut1 // fucosyltransferase 1 // 7 B4|7 23.2 cM // 14343 /// BC109145 // Fut1 // fucosyltransferase 1 // 7 B4|7 23.2 cM // 14343	NM_008051 // RefSeq // Mus musculus fucosyltransferase 1 (Fut1), mRNA. // chr7 // 100 // 100 // 25 // 25 // 0 /// ENSMUST00000008605 // ENSEMBL // Putative uncharacterized protein gene:ENSMUSG00000008461 // chr7 // 100 // 100 // 25 // 25 // 0 /// BC109145 // GenBank // Mus musculus fucosyltransferase 1, mRNA (cDNA clone MGC:129302 IMAGE:40045410), complete cds. // chr7 // 100 // 52 // 13 // 13 //…	Fut1	0.000157241	6.4198	5.01988	0.443945	33.5479	9.47938	7.69654	0.459461	215.371	66.8276	4.40779	5.12406	5.07792	5.46975	7.34878	7.25244	8.06413	8.12083	21.2264	34.8736	33.7758	44.3158	163.006	152.476	267.637	278.364
NM_028060 // Slc35f2 // solute carrier family 35, member F2 // 9 A5.3|9 // 72022 /// ENSMUST00000048670 // Slc35f2 // solute carrier family 35, member F2 // 9 A5.3|9 // 72022 /// BC055843 // Slc35f2 // solute carrier family 35, member F2 // 9 A5.3|9 // 72022	NM_028060 // RefSeq // Mus musculus solute carrier family 35, member F2 (Slc35f2), mRNA. // chr9 // 100 // 100 // 31 // 31 // 0 /// ENSMUST00000048670 // ENSEMBL // Solute carrier family 35 member F2 gene:ENSMUSG00000042195 // chr9 // 100 // 90 // 28 // 28 // 0 /// BC055843 // GenBank // Mus musculus solute carrier family 35, member F2, mRNA (cDNA clone MGC:67866 IMAGE:3991126), complete cds. // …	Slc35f2	4.22654e-05	5.27388	4.12421	0.328224	17.7938	4.2824	6.52687	0.314772	93.8424	19.897	4.16526	3.86089	3.89811	4.57259	6.79398	6.16148	6.78526	6.36678	17.9419	14.5292	14.909	23.7951	110.966	71.58	110.297	82.526
NM_013930 // Aass // aminoadipate-semialdehyde synthase // 6 A3.1|6 4.5 cM // 30956 /// ENSMUST00000031707 // Aass // aminoadipate-semialdehyde synthase // 6 A3.1|6 4.5 cM // 30956 /// BC005420 // Aass // aminoadipate-semialdehyde synthase // 6 A3.1|6 4.5 cM // 30956 /// ENSMUST00000149864 // Aass // aminoadipate-semialdehyde synthase // 6 A3.1|6 4.5 cM // 30956	NM_013930 // RefSeq // Mus musculus aminoadipate-semialdehyde synthase (Aass), nuclear gene encoding mitochondrial protein, mRNA. // chr6 // 100 // 100 // 47 // 47 // 0 /// ENSMUST00000031707 // ENSEMBL // Alpha-aminoadipic semialdehyde synthase, mitochondrial gene:ENSMUSG00000029695 // chr6 // 100 // 100 // 47 // 47 // 0 /// BC005420 // GenBank // Mus musculus aminoadipate-semialdehyde synthase,…	Aass	1.65722e-05	4.49083	4.94978	0.290207	31.3767	6.27976	7.1287	0.196795	140.907	18.7624	4.66149	5.13606	5.25539	4.74618	7.10512	6.8707	7.33812	7.20087	25.3074	35.1648	38.197	26.8375	137.675	117.027	161.806	147.122
NM_009704 // Areg // amphiregulin // 5 E1|5 51.0 cM // 11839 /// ENSMUST00000031325 // Areg // amphiregulin // 5 E1|5 51.0 cM // 11839 /// BC009138 // Areg // amphiregulin // 5 E1|5 51.0 cM // 11839	NM_009704 // RefSeq // Mus musculus amphiregulin (Areg), mRNA. // chr5 // 100 // 100 // 28 // 28 // 0 /// ENSMUST00000031325 // ENSEMBL // Amphiregulin gene:ENSMUSG00000029378 // chr5 // 100 // 100 // 28 // 28 // 0 /// BC009138 // GenBank // Mus musculus amphiregulin, mRNA (cDNA clone MGC:11536 IMAGE:3597695), complete cds. // chr5 // 86 // 100 // 24 // 28 // 0	Areg	2.72045e-05	4.42219	5.65518	0.222795	50.8334	7.50396	7.78927	0.300571	224.795	46.0289	5.80544	5.62284	5.35298	5.83948	7.42163	8.1264	7.9088	7.70025	55.9256	49.2768	40.8703	57.2609	171.448	279.44	240.319	207.972
NM_019738 // Nupr1 // nuclear protein 1 // 7 F4|7 // 56312 /// ENSMUST00000032961 // Nupr1 // nuclear protein 1 // 7 F4|7 // 56312 /// BC002109 // Nupr1 // nuclear protein 1 // 7 F4|7 // 56312	NM_019738 // RefSeq // Mus musculus nuclear protein 1 (Nupr1), mRNA. // chr7 // 100 // 100 // 25 // 25 // 0 /// ENSMUST00000032961 // ENSEMBL // Nuclear protein 1 gene:ENSMUSG00000030717 // chr7 // 100 // 100 // 25 // 25 // 0 /// BC002109 // GenBank // Mus musculus nuclear protein 1, mRNA (cDNA clone MGC:6602 IMAGE:3487434), complete cds. // chr7 // 100 // 100 // 25 // 25 // 0 /// ENSMUST00000131…	Nupr1	0.000152288	3.83706	8.15766	0.383446	292.858	72.5548	10.1161	0.262701	1123.71	204.264	7.63143	8.25092	8.54985	8.19843	9.99538	9.82005	10.4192	10.23	198.285	304.632	374.767	293.748	1020.73	903.921	1369.26	1200.94
NM_175093 // Trib3 // tribbles homolog 3 (Drosophila) // 2 G3|2 86.0 cM // 228775 /// ENSMUST00000040312 // Trib3 // tribbles homolog 3 (Drosophila) // 2 G3|2 86.0 cM // 228775 /// AF358868 // Trib3 // tribbles homolog 3 (Drosophila) // 2 G3|2 86.0 cM // 228775 /// ENSMUST00000099213 // Trib3 // tribbles homolog 3 (Drosophila) // 2 G3|2 86.0 cM // 228775	NM_175093 // RefSeq // Mus musculus tribbles homolog 3 (Drosophila) (Trib3), mRNA. // chr2 // 100 // 100 // 29 // 29 // 0 /// ENSMUST00000040312 // ENSEMBL // Tribbles homolog 3 gene:ENSMUSG00000032715 // chr2 // 100 // 97 // 28 // 28 // 0 /// AF358868 // GenBank // Mus musculus TRB-3 mRNA, complete cds. // chr2 // 96 // 83 // 23 // 24 // 0 /// ENSMUST00000099213 // ENSEMBL // Putative uncharacte…	Trib3	8.79068e-06	3.70357	6.37079	0.0850181	82.864	4.89982	8.24406	0.256637	306.893	56.62	6.41762	6.46697	6.29657	6.30199	8.18513	8.22458	8.59202	7.97451	85.4864	88.4608	78.6064	78.9022	291.051	299.12	385.883	251.516
NM_177420 // Psat1 // phosphoserine aminotransferase 1 // 19 A|19 32.5 cM // 107272 /// ENSMUST00000025542 // Psat1 // phosphoserine aminotransferase 1 // 19 A|19 32.5 cM // 107272 /// BC004827 // Psat1 // phosphoserine aminotransferase 1 // 19 A|19 32.5 cM // 107272	NM_177420 // RefSeq // Mus musculus phosphoserine aminotransferase 1 (Psat1), mRNA. // chr19 // 100 // 83 // 29 // 29 // 0 /// ENSMUST00000025542 // ENSEMBL // Phosphoserine aminotransferase gene:ENSMUSG00000024640 // chr19 // 100 // 91 // 32 // 32 // 0 /// BC004827 // GenBank // Mus musculus phosphoserine aminotransferase 1, mRNA (cDNA clone MGC:6462 IMAGE:2616298), complete cds. // chr19 // 93 …	Psat1	0.00090583	3.33387	6.82265	0.160619	113.74	13.3353	8.49647	0.527397	379.195	132.234	6.75361	6.75128	6.72304	7.06268	8.18442	7.9158	8.9165	8.96918	107.905	107.73	105.642	133.684	290.908	241.486	483.209	501.178
NM_001011531 // Olfr329-ps // olfactory receptor 329, pseudogene // 11 B1.3|11 // 259148 /// NM_207153 // Olfr325 // olfactory receptor 325 // 11 B1.3|11 // 258261 /// NM_146879 // Olfr330 // olfactory receptor 330 // 11 B1|11 // 258879 /// ENSMUST00000076902 // Olfr325 // olfactory receptor 325 // 11 B1.3|11 // 258261 /// ENSMUST00000062869 // Olfr330 // olfactory receptor 330 // 11 B1|11 // 258…	NM_001011531 // RefSeq // Mus musculus olfactory receptor 329, pseudogene (Olfr329-ps), mRNA. // chr11 // 100 // 100 // 25 // 25 // 0 /// NM_207153 // RefSeq // Mus musculus olfactory receptor 325 (Olfr325), mRNA. // chr11 // 76 // 100 // 19 // 25 // 0 /// NM_146879 // RefSeq // Mus musculus olfactory receptor 330 (Olfr330), mRNA. // chr11 // 76 // 100 // 19 // 25 // 0 /// ENSMUST00000076902 // E…	Olfr329-ps	0.000666826	3.29816	4.18732	0.223183	18.3873	2.96927	5.86887	0.472708	60.6443	17.5639	3.96889	4.49912	4.13221	4.14905	5.19508	5.97276	6.30075	6.00691	15.6587	22.6136	17.5356	17.7414	36.6332	62.8027	78.834	64.3071
NM_146879 // Olfr330 // olfactory receptor 330 // 11 B1|11 // 258879 /// NM_001011861 // Olfr331 // olfactory receptor 331 // 11 B1.3|11 // 258179 /// NM_207153 // Olfr325 // olfactory receptor 325 // 11 B1.3|11 // 258261 /// NM_001011531 // Olfr329-ps // olfactory receptor 329, pseudogene // 11 B1.3|11 // 259148 /// ENSMUST00000062869 // Olfr330 // olfactory receptor 330 // 11 B1|11 // 258879 //…	NM_146879 // RefSeq // Mus musculus olfactory receptor 330 (Olfr330), mRNA. // chr11 // 69 // 100 // 18 // 26 // 0 /// NM_001011861 // RefSeq // Mus musculus olfactory receptor 331 (Olfr331), mRNA. // chr11 // 69 // 100 // 18 // 26 // 0 /// NM_207153 // RefSeq // Mus musculus olfactory receptor 325 (Olfr325), mRNA. // chr11 // 64 // 96 // 16 // 25 // 0 /// NM_001011531 // RefSeq // Mus musculus o…	Olfr330	7.75301e-05	3.18692	5.40036	0.101003	42.3108	2.87255	7.04612	0.331419	134.841	31.691	5.25264	5.47684	5.4219	5.45005	6.73509	6.82425	7.45673	7.1684	38.1242	44.5342	42.8701	43.7147	106.528	113.319	175.67	143.848
NM_007669 // Cdkn1a // cyclin-dependent kinase inhibitor 1A (P21) // 17 A3.3|17 15.23 cM // 12575 /// NM_001111099 // Cdkn1a // cyclin-dependent kinase inhibitor 1A (P21) // 17 A3.3|17 15.23 cM // 12575 /// ENSMUST00000023829 // Cdkn1a // cyclin-dependent kinase inhibitor 1A (P21) // 17 A3.3|17 15.23 cM // 12575 /// ENSMUST00000122348 // Cdkn1a // cyclin-dependent kinase inhibitor 1A (P21) // 17 …	NM_007669 // RefSeq // Mus musculus cyclin-dependent kinase inhibitor 1A (P21) (Cdkn1a), transcript variant 1, mRNA. // chr17 // 100 // 87 // 26 // 26 // 0 /// NM_001111099 // RefSeq // Mus musculus cyclin-dependent kinase inhibitor 1A (P21) (Cdkn1a), transcript variant 2, mRNA. // chr17 // 100 // 77 // 23 // 23 // 0 /// ENSMUST00000023829 // ENSEMBL // Cyclin-dependent kinase inhibitor 1 gene:EN…	Cdkn1a	8.19174e-06	3.06451	6.59471	0.187125	97.2505	12.2548	8.21439	0.135356	298.025	29.2047	6.3434	6.66198	6.78781	6.58565	8.14793	8.12928	8.16404	8.4163	81.1998	101.264	110.493	96.0456	283.642	280	286.827	341.632
NM_016966 // Phgdh // 3-phosphoglycerate dehydrogenase // 3|3 E1 // 236539 /// ENSMUST00000065793 // Phgdh // 3-phosphoglycerate dehydrogenase // 3|3 E1 // 236539 /// BC086668 // Phgdh // 3-phosphoglycerate dehydrogenase // 3|3 E1 // 236539	NM_016966 // RefSeq // Mus musculus 3-phosphoglycerate dehydrogenase (Phgdh), mRNA. // chr3 // 100 // 100 // 8 // 8 // 0 /// ENSMUST00000065793 // ENSEMBL // D-3-phosphoglycerate dehydrogenase gene:ENSMUSG00000053398 // chr3 // 100 // 100 // 8 // 8 // 0 /// BC086668 // GenBank // Mus musculus 3-phosphoglycerate dehydrogenase, mRNA (cDNA clone MGC:113796 IMAGE:30633243), complete cds. // chr3 // 1…	Phgdh	0.00337043	2.95698	6.56178	0.21545	95.2836	14.7862	8.05367	0.599006	281.752	101.263	6.37948	6.58736	6.85588	6.42439	7.22119	8.03427	8.58005	8.37917	83.2557	96.1594	115.831	85.8884	149.209	262.153	382.695	332.952
NM_153543 // Aldh1l2 // aldehyde dehydrogenase 1 family, member L2 // 10 C1|10 // 216188 /// ENSMUST00000020497 // Aldh1l2 // aldehyde dehydrogenase 1 family, member L2 // 10 C1|10 // 216188 /// BC034531 // Aldh1l2 // aldehyde dehydrogenase 1 family, member L2 // 10 C1|10 // 216188	NM_153543 // RefSeq // Mus musculus aldehyde dehydrogenase 1 family, member L2 (Aldh1l2), nuclear gene encoding mitochondrial protein, mRNA. // chr10 // 100 // 100 // 46 // 46 // 0 /// ENSMUST00000020497 // ENSEMBL // Probable 10-formyltetrahydrofolate dehydrogenase ALDH1L2 gene:ENSMUSG00000020256 // chr10 // 100 // 100 // 46 // 46 // 0 /// BC034531 // GenBank // Mus musculus aldehyde dehydrogena…	Aldh1l2	0.000258515	2.89367	7.82424	0.265155	229.567	43.0766	9.35341	0.298432	664.291	129.585	7.57189	7.91685	7.6532	8.15501	9.31896	8.94862	9.62626	9.51983	190.268	241.663	201.299	285.038	638.683	494.085	790.3	734.097
NM_022018 // Fam129a // family with sequence similarity 129, member A // 1 G2|1 // 63913 /// ENSMUST00000148810 // Fam129a // family with sequence similarity 129, member A // 1 G2|1 // 63913 /// AB049355 // Fam129a // family with sequence similarity 129, member A // 1 G2|1 // 63913 /// ENSMUST00000097541 // Fam129a // family with sequence similarity 129, member A // 1 G2|1 // 63913 /// ENSMUST000…	NM_022018 // RefSeq // Mus musculus family with sequence similarity 129, member A (Fam129a), mRNA. // chr1 // 100 // 100 // 30 // 30 // 0 /// ENSMUST00000148810 // ENSEMBL // Protein Niban gene:ENSMUSG00000026483 // chr1 // 100 // 100 // 30 // 30 // 0 /// AB049355 // GenBank // Mus musculus Niban mRNA, complete cds. // chr1 // 100 // 87 // 26 // 26 // 0 /// ENSMUST00000097541 // ENSEMBL // Putati…	Fam129a	0.000996884	2.87645	6.26793	0.240845	77.8696	12.9645	7.76126	0.439216	223.988	59.9505	6.1314	6.39765	6.00816	6.53452	7.84915	7.12676	8.13213	7.93698	70.1025	84.3109	64.3631	92.7016	230.584	139.756	280.554	245.058
NM_145953 // Cth // cystathionase (cystathionine gamma-lyase) // 3 H4|3 // 107869 /// ENSMUST00000118539 // Cth // cystathionase (cystathionine gamma-lyase) // 3 H4|3 // 107869 /// ENSMUST00000029830 // Cth // cystathionase (cystathionine gamma-lyase) // 3 H4|3 // 107869 /// BC019483 // Cth // cystathionase (cystathionine gamma-lyase) // 3 H4|3 // 107869	NM_145953 // RefSeq // Mus musculus cystathionase (cystathionine gamma-lyase) (Cth), mRNA. // chr3 // 100 // 100 // 24 // 24 // 0 /// ENSMUST00000118539 // ENSEMBL // Cystathionine gamma-lyase gene:ENSMUSG00000028179 // chr3 // 100 // 100 // 24 // 24 // 0 /// ENSMUST00000029830 // ENSEMBL // Cystathionine gamma-lyase gene:ENSMUSG00000028179 // chr3 // 100 // 92 // 22 // 22 // 0 /// BC019483 // Ge…	Cth	0.00155361	2.85796	4.33049	0.186204	20.2474	2.68634	5.78995	0.499776	57.8664	19.8564	4.36771	4.1667	4.57788	4.20966	5.31079	5.42642	6.33881	6.08379	20.6448	17.9598	23.8825	18.5026	39.6924	43.0047	80.9414	67.827
NM_182928 // Adm2 // adrenomedullin 2 // 15 E3|15 // 223780 /// ENSMUST00000066991 // Adm2 // adrenomedullin 2 // 15 E3|15 // 223780 /// AB121035 // Adm2 // adrenomedullin 2 // 15 E3|15 // 223780	NM_182928 // RefSeq // Mus musculus adrenomedullin 2 (Adm2), mRNA. // chr15 // 100 // 100 // 26 // 26 // 0 /// ENSMUST00000066991 // ENSEMBL // ADM2 gene:ENSMUSG00000054136 // chr15 // 100 // 100 // 26 // 26 // 0 /// AB121035 // GenBank // Mus musculus ADM2 mRNA for adrenomedullin 2, complete cds. // chr15 // 100 // 100 // 26 // 26 // 0	Adm2	0.000280478	2.77098	5.71003	0.349536	53.5506	13.6366	7.20393	0.185736	148.388	20.1567	5.34465	5.67328	5.63649	6.1857	7.07685	7.16488	7.47676	7.09723	40.635	51.0304	49.7453	72.7917	135.004	143.497	178.126	136.924
NM_001024468 // Bcat1 // branched chain aminotransferase 1, cytosolic // 6 G3|6 73.9 cM // 12035 /// NM_007532 // Bcat1 // branched chain aminotransferase 1, cytosolic // 6 G3|6 73.9 cM // 12035 /// ENSMUST00000111742 // Bcat1 // branched chain aminotransferase 1, cytosolic // 6 G3|6 73.9 cM // 12035 /// ENSMUST00000032402 // Bcat1 // branched chain aminotransferase 1, cytosolic // 6 G3|6 73.9 cM…	NM_001024468 // RefSeq // Mus musculus branched chain aminotransferase 1, cytosolic (Bcat1), transcript variant 1, mRNA. // chr6 // 100 // 88 // 36 // 36 // 0 /// NM_007532 // RefSeq // Mus musculus branched chain aminotransferase 1, cytosolic (Bcat1), transcript variant 2, mRNA. // chr6 // 100 // 88 // 36 // 36 // 0 /// ENSMUST00000111742 // ENSEMBL // Branched-chain-amino-acid aminotransferase,…	Bcat1	0.00722391	2.73342	4.66467	0.163297	25.4838	2.82865	6.01127	0.655433	69.658	31.0959	4.81608	4.45934	4.77366	4.6096	5.46786	5.44519	6.73565	6.39638	28.1699	21.9986	27.3535	24.4133	44.2579	43.5678	106.57	84.2369
NM_026929 // Chac1 // ChaC, cation transport regulator-like 1 (E. coli) // 2 E5|2 // 69065 /// ENSMUST00000028780 // Chac1 // ChaC, cation transport regulator-like 1 (E. coli) // 2 E5|2 // 69065 /// BC025169 // Chac1 // ChaC, cation transport regulator-like 1 (E. coli) // 2 E5|2 // 69065	NM_026929 // RefSeq // Mus musculus ChaC, cation transport regulator-like 1 (E. coli) (Chac1), mRNA. // chr2 // 100 // 100 // 26 // 26 // 0 /// ENSMUST00000028780 // ENSEMBL // cation transport regulator-like protein 1 gene:ENSMUSG00000027313 // chr2 // 100 // 100 // 26 // 26 // 0 /// BC025169 // GenBank // Mus musculus ChaC, cation transport regulator-like 1 (E. coli), mRNA (cDNA clone MGC:36866…	Chac1	1.07599e-05	2.64455	7.34157	0.15398	162.877	16.9853	8.74545	0.142428	430.737	41.8229	7.37851	7.50432	7.34976	7.1337	8.89034	8.71077	8.81798	8.56269	166.4	181.562	163.117	140.429	474.525	418.991	451.313	378.118
NM_016966 // Phgdh // 3-phosphoglycerate dehydrogenase // 3|3 E1 // 236539 /// NM_016966 // Phgdh // 3-phosphoglycerate dehydrogenase // 3|3 E1 // 236539 /// ENSMUST00000065793 // Phgdh // 3-phosphoglycerate dehydrogenase // 3|3 E1 // 236539 /// BC086668 // Phgdh // 3-phosphoglycerate dehydrogenase // 3|3 E1 // 236539 /// BC086668 // Phgdh // 3-phosphoglycerate dehydrogenase // 3|3 E1 // 236539	NM_016966 // RefSeq // Mus musculus 3-phosphoglycerate dehydrogenase (Phgdh), mRNA. // chr7 // 79 // 89 // 19 // 24 // 0 /// ENSMUST00000065793 // ENSEMBL // D-3-phosphoglycerate dehydrogenase gene:ENSMUSG00000053398 // chr7 // 79 // 89 // 19 // 24 // 0 /// BC086668 // GenBank // Mus musculus 3-phosphoglycerate dehydrogenase, mRNA (cDNA clone MGC:113796 IMAGE:30633243), complete cds. // chr7 // 7…	Phgdh	0.000514211	2.54689	6.89058	0.132367	119.028	11.0194	8.20796	0.367014	303.152	80.1299	6.87371	6.73827	6.88924	7.0611	7.86992	7.97361	8.68269	8.30563	117.272	106.763	118.54	133.538	233.927	251.36	410.912	316.406
NM_009027 // Rasgrf2 // RAS protein-specific guanine nucleotide-releasing factor 2 // 13 C3-D1|13 52.0 cM // 19418 /// ENSMUST00000151408 // Rasgrf2 // RAS protein-specific guanine nucleotide-releasing factor 2 // 13 C3-D1|13 52.0 cM // 19418 /// U67326 // Rasgrf2 // RAS protein-specific guanine nucleotide-releasing factor 2 // 13 C3-D1|13 52.0 cM // 19418 /// ENSMUST00000146492 // Rasgrf2 // RAS…	NM_009027 // RefSeq // Mus musculus RAS protein-specific guanine nucleotide-releasing factor 2 (Rasgrf2), mRNA. // chr13 // 100 // 96 // 43 // 43 // 0 /// ENSMUST00000151408 // ENSEMBL // Ras-specific guanine nucleotide-releasing factor 2 gene:ENSMUSG00000021708 // chr13 // 100 // 64 // 29 // 29 // 0 /// U67326 // GenBank // Mus musculus guanine nucleotide release/exchange factor Ras-GRF2 mRNA, c…	Rasgrf2	0.00499475	2.37297	6.37319	0.366239	84.7971	19.6171	7.60556	0.437858	201.221	56.1564	5.85226	6.45447	6.47518	6.71086	7.55943	7.01353	7.82742	8.02187	57.7706	87.6981	88.9662	104.754	188.632	129.206	227.137	259.91
---	ENSMUST00000082039 // ENSEMBL // cdna:novel chromosome:NCBIM37:19:44925777:44926469:1 gene:ENSMUSG00000058350 // chr19 // 100 // 100 // 14 // 14 // 0 /// GENSCAN00000031951 // ENSEMBL // cdna:Genscan chromosome:NCBIM37:19:44925783:45005826:1 // chr19 // 100 // 86 // 12 // 12 // 0		0.00138547	2.32779	5.81494	0.18676	56.6426	7.10307	7.00418	0.381772	131.852	35.9198	5.56722	5.98268	5.9322	5.77766	6.59671	6.84447	7.08179	7.49376	47.4135	63.2361	61.0618	54.8592	96.785	114.919	135.467	180.238
NM_057173 // Lmo1 // LIM domain only 1 // 7 E3|7 51.5 cM // 109594 /// ENSMUST00000036992 // Lmo1 // LIM domain only 1 // 7 E3|7 51.5 cM // 109594 /// BC053074 // Lmo1 // LIM domain only 1 // 7 E3|7 51.5 cM // 109594	NM_057173 // RefSeq // Mus musculus LIM domain only 1 (Lmo1), mRNA. // chr7 // 100 // 86 // 24 // 24 // 0 /// ENSMUST00000036992 // ENSEMBL // Rhombotin-1 gene:ENSMUSG00000036111 // chr7 // 100 // 100 // 28 // 28 // 0 /// BC053074 // GenBank // Mus musculus LIM domain only 1, mRNA (cDNA clone MGC:62435 IMAGE:5693266), complete cds. // chr7 // 100 // 86 // 24 // 24 // 0	Lmo1	0.00785041	2.24556	5.16696	0.220297	36.24	5.50067	6.27557	0.521797	81.3789	29.5915	5.14714	4.89337	5.1968	5.43051	5.71318	6.01096	6.47863	6.8995	35.4359	29.7202	36.677	43.1267	52.4614	64.4883	89.1787	119.387
NM_011858 // Odz4 // odd Oz/ten-m homolog 4 (Drosophila) // 7 E1|7 47.7 cM // 23966 /// ENSMUST00000107169 // Odz4 // odd Oz/ten-m homolog 4 (Drosophila) // 7 E1|7 47.7 cM // 23966 /// AF059485 // Odz4 // odd Oz/ten-m homolog 4 (Drosophila) // 7 E1|7 47.7 cM // 23966 /// AB025413 // Odz4 // odd Oz/ten-m homolog 4 (Drosophila) // 7 E1|7 47.7 cM // 23966 /// ENSMUST00000107162 // Odz4 // odd Oz/ten…	NM_011858 // RefSeq // Mus musculus odd Oz/ten-m homolog 4 (Drosophila) (Odz4), mRNA. // chr7 // 100 // 92 // 34 // 34 // 0 /// ENSMUST00000107169 // ENSEMBL // Isoform 4 of Teneurin-4 gene:ENSMUSG00000048078 // chr7 // 100 // 92 // 34 // 34 // 0 /// AF059485 // GenBank // Mus musculus DOC4 (Doc4) mRNA, complete cds. // chr7 // 100 // 89 // 33 // 33 // 0 /// AB025413 // GenBank // Mus musculus mR…	Odz4	0.000161075	2.24165	5.56826	0.180799	47.7392	6.34299	6.73005	0.211846	107.015	15.5948	5.47081	5.46936	5.49394	5.83893	6.51375	6.58349	6.89511	6.92786	44.3484	44.304	45.0651	57.2393	91.3766	95.902	119.024	121.757
NM_178737 // AW551984 // expressed sequence AW551984 // 9 A5.1|9 // 244810 /// ENSMUST00000042485 // AW551984 // expressed sequence AW551984 // 9 A5.1|9 // 244810 /// ENSMUST00000119722 // AW551984 // expressed sequence AW551984 // 9 A5.1|9 // 244810 /// BC061211 // AW551984 // expressed sequence AW551984 // 9 A5.1|9 // 244810 /// ENSMUST00000086047 // AW551984 // expressed sequence AW551984 // 9…	NM_178737 // RefSeq // Mus musculus expressed sequence AW551984 (AW551984), mRNA. // chr9 // 100 // 94 // 45 // 45 // 0 /// ENSMUST00000042485 // ENSEMBL // Putative uncharacterized protein gene:ENSMUSG00000038112 // chr9 // 100 // 94 // 45 // 45 // 0 /// ENSMUST00000119722 // ENSEMBL // Putative uncharacterized protein gene:ENSMUSG00000038112 // chr9 // 100 // 92 // 44 // 44 // 0 /// BC061211 //…	AW551984	2.7401e-05	2.20619	5.67317	0.0958258	51.1093	3.3046	6.80925	0.174889	112.757	13.3402	5.74546	5.68315	5.53498	5.72908	6.75421	6.58602	6.93883	6.95793	53.6483	51.3806	46.3655	53.0426	107.949	96.0702	122.686	124.321
NM_001146217 // Smoc1 // SPARC related modular calcium binding 1 // 12 D1|12 // 64075 /// NM_022316 // Smoc1 // SPARC related modular calcium binding 1 // 12 D1|12 // 64075 /// ENSMUST00000110347 // Smoc1 // SPARC related modular calcium binding 1 // 12 D1|12 // 64075 /// ENSMUST00000021564 // Smoc1 // SPARC related modular calcium binding 1 // 12 D1|12 // 64075 /// BC031804 // Smoc1 // SPARC rel…	NM_001146217 // RefSeq // Mus musculus SPARC related modular calcium binding 1 (Smoc1), transcript variant 1, mRNA. // chr12 // 100 // 100 // 26 // 26 // 0 /// NM_022316 // RefSeq // Mus musculus SPARC related modular calcium binding 1 (Smoc1), transcript variant 2, mRNA. // chr12 // 100 // 100 // 26 // 26 // 0 /// ENSMUST00000110347 // ENSEMBL // Isoform 1 of SPARC-related modular calcium-bindin…	Smoc1	0.000101096	2.19225	5.7113	0.123628	52.5374	4.50581	6.83563	0.215064	115.175	17.2251	5.56139	5.72152	5.69893	5.86335	6.71256	6.60844	6.9378	7.08374	47.222	52.7655	51.9457	58.2164	104.877	97.575	122.599	135.649
NM_175562 // Rab39 // RAB39, member RAS oncogene family // 9 A5.3|9 // 270160 /// ENSMUST00000068449 // Rab39 // RAB39, member RAS oncogene family // 9 A5.3|9 // 270160 /// BC049787 // Rab39 // RAB39, member RAS oncogene family // 9 A5.3|9 // 270160	NM_175562 // RefSeq // Mus musculus RAB39, member RAS oncogene family (Rab39), mRNA. // chr9 // 100 // 100 // 26 // 26 // 0 /// ENSMUST00000068449 // ENSEMBL // Ras-related protein Rab-39A gene:ENSMUSG00000055069 // chr9 // 100 // 100 // 26 // 26 // 0 /// BC049787 // GenBank // Mus musculus RAB39, member RAS oncogene family, mRNA (cDNA clone MGC:59389 IMAGE:6511404), complete cds. // chr9 // 100 …	Rab39	0.000203906	2.17557	5.48982	0.231398	45.3731	7.29093	6.61835	0.161605	98.7123	11.0971	5.63134	5.30254	5.28413	5.74127	6.8087	6.68545	6.53693	6.44233	49.5682	39.4661	38.9656	53.4926	112.105	102.925	92.8566	86.9629
NM_028325 // Zcchc12 // zinc finger, CCHC domain containing 12 // X A3.3|X // 72693 /// ENSMUST00000115258 // Zcchc12 // zinc finger, CCHC domain containing 12 // X A3.3|X // 72693 /// ENSMUST00000115256 // Zcchc12 // zinc finger, CCHC domain containing 12 // X A3.3|X // 72693 /// ENSMUST00000048067 // Zcchc12 // zinc finger, CCHC domain containing 12 // X A3.3|X // 72693 /// ENSMUST00000115257 /…	NM_028325 // RefSeq // Mus musculus zinc finger, CCHC domain containing 12 (Zcchc12), mRNA. // chrX // 100 // 100 // 25 // 25 // 0 /// ENSMUST00000115258 // ENSEMBL // Zinc finger CCHC domain-containing protein 12 gene:ENSMUSG00000036699 // chrX // 100 // 100 // 25 // 25 // 0 /// ENSMUST00000115256 // ENSEMBL // Zinc finger CCHC domain-containing protein 12 gene:ENSMUSG00000036699 // chrX // 100 …	Zcchc12	0.00374487	2.16362	5.63347	0.132022	49.8	4.673	6.70255	0.447104	107.748	30.6644	5.50403	5.81682	5.59132	5.6217	6.84386	6.08864	7.15237	6.72532	45.3813	56.3687	48.2119	49.2379	114.87	68.0556	142.258	105.809
NM_009513 // Nrsn1 // neurensin 1 // 13 A3.1|13 // 22360 /// ENSMUST00000057866 // Nrsn1 // neurensin 1 // 13 A3.1|13 // 22360 /// D83206 // Nrsn1 // neurensin 1 // 13 A3.1|13 // 22360	NM_009513 // RefSeq // Mus musculus neurensin 1 (Nrsn1), mRNA. // chr13 // 100 // 100 // 25 // 25 // 0 /// ENSMUST00000057866 // ENSEMBL // Neurensin-1 gene:ENSMUSG00000048978 // chr13 // 100 // 100 // 25 // 25 // 0 /// D83206 // GenBank // Mus musculus mRNA for P24 protein, complete cds. // chr13 // 100 // 96 // 24 // 24 // 0 /// ENSMUST00000156448 // ENSEMBL // cdna:known chromosome:NCBIM37:13:…	Nrsn1	0.00762955	2.14921	7.44043	0.294205	176.375	34.9424	8.51613	0.460097	379.068	105.108	7.0795	7.61442	7.73596	7.33184	8.55826	7.85264	8.82376	8.82987	135.252	195.961	213.185	161.103	376.959	231.142	453.124	455.046
NM_023794 // Etv5 // ets variant gene 5 // 16 B1|16 // 104156 /// ENSMUST00000079601 // Etv5 // ets variant gene 5 // 16 B1|16 // 104156 /// BC034680 // Etv5 // ets variant gene 5 // 16 B1|16 // 104156 /// ENSMUST00000051229 // Etv5 // ets variant gene 5 // 16 B1|16 // 104156	NM_023794 // RefSeq // Mus musculus ets variant gene 5 (Etv5), mRNA. // chr10 // 86 // 100 // 24 // 28 // 0 /// ENSMUST00000079601 // ENSEMBL // ETS translocation variant 5 gene:ENSMUSG00000013089 // chr10 // 86 // 100 // 24 // 28 // 0 /// BC034680 // GenBank // Mus musculus ets variant gene 5, mRNA (cDNA clone MGC:28414 IMAGE:4036564), complete cds. // chr10 // 86 // 100 // 24 // 28 // 0 /// ENS…	Etv5	0.00416731	2.13372	7.35629	0.196039	165.027	23.344	8.41282	0.428344	352.122	102.242	7.24339	7.6295	7.3629	7.18938	8.12882	7.96897	8.71395	8.83955	151.522	198.02	164.609	145.956	279.909	250.553	419.914	458.109
NM_144795 // Pycr1 // pyrroline-5-carboxylate reductase 1 // 11 E2|11 // 209027 /// ENSMUST00000026133 // Pycr1 // pyrroline-5-carboxylate reductase 1 // 11 E2|11 // 209027 /// BC006727 // Pycr1 // pyrroline-5-carboxylate reductase 1 // 11 E2|11 // 209027 /// ENSMUST00000141254 // Pycr1 // pyrroline-5-carboxylate reductase 1 // 11 E2|11 // 209027 /// ENSMUST00000139706 // Pycr1 // pyrroline-5-car…	NM_144795 // RefSeq // Mus musculus pyrroline-5-carboxylate reductase 1 (Pycr1), mRNA. // chr11 // 100 // 90 // 27 // 27 // 0 /// ENSMUST00000026133 // ENSEMBL // Pyrroline-5-carboxylate reductase 1, mitochondrial gene:ENSMUSG00000025140 // chr11 // 100 // 80 // 24 // 24 // 0 /// BC006727 // GenBank // Mus musculus pyrroline-5-carboxylate reductase 1, mRNA (cDNA clone MGC:11688 IMAGE:3962093), co…	Pycr1	0.00017955	2.09268	8.21618	0.183697	299.255	39.9351	9.28193	0.184721	626.246	77.2486	8.08153	8.10222	8.20045	8.48051	9.26234	9.02982	9.44523	9.39035	270.884	274.797	294.158	357.18	614.103	522.692	697.104	671.083
NM_010113 // Egf // epidermal growth factor // 3 G3|3 65.2 cM // 13645 /// ENSMUST00000029653 // Egf // epidermal growth factor // 3 G3|3 65.2 cM // 13645 /// BC092277 // Egf // epidermal growth factor // 3 G3|3 65.2 cM // 13645	NM_010113 // RefSeq // Mus musculus epidermal growth factor (Egf), mRNA. // chr3 // 100 // 100 // 25 // 25 // 0 /// ENSMUST00000029653 // ENSEMBL // pro-epidermal growth factor precursor gene:ENSMUSG00000028017 // chr3 // 100 // 100 // 25 // 25 // 0 /// BC092277 // GenBank // Mus musculus epidermal growth factor, mRNA (cDNA clone MGC:102520 IMAGE:4240429), complete cds. // chr3 // 100 // 92 // 23…	Egf	0.00237786	2.04785	7.5709	0.278996	192.838	37.6539	8.60176	0.30016	394.902	83.1723	7.2465	7.5025	7.6149	7.91971	8.49042	8.26513	8.67703	8.97446	151.85	181.333	196.026	242.142	359.642	307.647	409.303	503.017
NM_008135 // Slc6a9 // solute carrier family 6 (neurotransmitter transporter, glycine), member 9 // 4 D2.1|4 52.0 cM // 14664 /// ENSMUST00000063857 // Slc6a9 // solute carrier family 6 (neurotransmitter transporter, glycine), member 9 // 4 D2.1|4 52.0 cM // 14664 /// ENSMUST00000030269 // Slc6a9 // solute carrier family 6 (neurotransmitter transporter, glycine), member 9 // 4 D2.1|4 52.0 cM // 1…	NM_008135 // RefSeq // Mus musculus solute carrier family 6 (neurotransmitter transporter, glycine), member 9 (Slc6a9), mRNA. // chr4 // 100 // 82 // 27 // 27 // 0 /// ENSMUST00000063857 // ENSEMBL // Isoform GlyT-1A of Sodium- and chloride-dependent glycine transporter 1 gene:ENSMUSG00000028542 // chr4 // 100 // 85 // 28 // 28 // 0 /// ENSMUST00000030269 // ENSEMBL // Isoform GlyT-1A of Sodium- …	Slc6a9	0.00284399	2.0032	6.62813	0.313467	100.555	19.5099	7.6349	0.271866	201.433	38.0317	6.73777	6.81359	6.16056	6.8006	7.38299	7.42746	7.93436	7.7948	106.726	112.485	71.534	111.477	166.917	172.142	244.613	222.059
NM_008055 // Fzd4 // frizzled homolog 4 (Drosophila) // 7 E1|7 44.5 cM // 14366 /// ENSMUST00000058755 // Fzd4 // frizzled homolog 4 (Drosophila) // 7 E1|7 44.5 cM // 14366 /// BC015256 // Fzd4 // frizzled homolog 4 (Drosophila) // 7 E1|7 44.5 cM // 14366	NM_008055 // RefSeq // Mus musculus frizzled homolog 4 (Drosophila) (Fzd4), mRNA. // chr7 // 100 // 93 // 25 // 25 // 0 /// ENSMUST00000058755 // ENSEMBL // Frizzled-4 gene:ENSMUSG00000049791 // chr7 // 100 // 63 // 17 // 17 // 0 /// BC015256 // GenBank // Mus musculus frizzled homolog 4 (Drosophila), mRNA (cDNA clone MGC:18403 IMAGE:4238940), complete cds. // chr7 // 94 // 63 // 16 // 17 // 0	Fzd4	0.000246792	1.95718	5.85202	0.19112	58.1368	7.5346	6.82342	0.163436	113.784	12.2997	5.77773	6.01759	5.61601	5.99675	6.86556	6.58644	6.96094	6.88075	54.862	64.7851	49.0441	63.8559	116.611	96.0984	124.581	117.846
NM_007918 // Eif4ebp1 // eukaryotic translation initiation factor 4E binding protein 1 // 8 A4-B1|8 8.0 cM // 13685 /// ENSMUST00000033880 // Eif4ebp1 // eukaryotic translation initiation factor 4E binding protein 1 // 8 A4-B1|8 8.0 cM // 13685 /// U28656 // Eif4ebp1 // eukaryotic translation initiation factor 4E binding protein 1 // 8 A4-B1|8 8.0 cM // 13685	NM_007918 // RefSeq // Mus musculus eukaryotic translation initiation factor 4E binding protein 1 (Eif4ebp1), mRNA. // chr8 // 100 // 65 // 17 // 17 // 0 /// ENSMUST00000033880 // ENSEMBL // Eukaryotic translation initiation factor 4E-binding protein 1 gene:ENSMUSG00000031490 // chr8 // 100 // 65 // 17 // 17 // 0 /// U28656 // GenBank // Mus musculus insulin-stimulated eIF-4E binding protein PHAS…	Eif4ebp1	0.000249596	1.94869	6.87447	0.0819494	117.476	6.6982	7.82472	0.232478	228.924	36.672	6.83903	6.97472	6.78401	6.90012	7.63019	7.61726	8.01059	8.04083	114.486	125.777	110.202	119.438	198.114	196.346	257.886	263.35
NM_018887 // Cyp39a1 // cytochrome P450, family 39, subfamily a, polypeptide 1 // 17 B3|17 // 56050 /// ENSMUST00000024760 // Cyp39a1 // cytochrome P450, family 39, subfamily a, polypeptide 1 // 17 B3|17 // 56050 /// AF237981 // Cyp39a1 // cytochrome P450, family 39, subfamily a, polypeptide 1 // 17 B3|17 // 56050 /// ENSMUST00000055172 // Cyp39a1 // cytochrome P450, family 39, subfamily a, polyp…	NM_018887 // RefSeq // Mus musculus cytochrome P450, family 39, subfamily a, polypeptide 1 (Cyp39a1), mRNA. // chr17 // 100 // 100 // 27 // 27 // 0 /// ENSMUST00000024760 // ENSEMBL // 24-hydroxycholesterol 7-alpha-hydroxylase gene:ENSMUSG00000023963 // chr17 // 100 // 89 // 24 // 24 // 0 /// AF237981 // GenBank // Mus musculus oxysterol 7alpha-hydroxylase (Cyp39A1) mRNA, complete cds. // chr17 /…	Cyp39a1	0.00411227	1.93976	6.67257	0.210556	102.847	15.5139	7.60753	0.358443	199.499	47.9413	6.53876	6.70841	6.4881	6.95503	7.19311	7.42281	7.91435	7.89983	92.9742	104.576	89.7661	124.071	146.333	171.589	241.244	238.829
NM_173866 // Gpt2 // glutamic pyruvate transaminase (alanine aminotransferase) 2 // 8 C3|8 // 108682 /// ENSMUST00000034136 // Gpt2 // glutamic pyruvate transaminase (alanine aminotransferase) 2 // 8 C3|8 // 108682 /// BC034219 // Gpt2 // glutamic pyruvate transaminase (alanine aminotransferase) 2 // 8 C3|8 // 108682 /// ENSMUST00000132932 // Gpt2 // glutamic pyruvate transaminase (alanine aminot…	NM_173866 // RefSeq // Mus musculus glutamic pyruvate transaminase (alanine aminotransferase) 2 (Gpt2), mRNA. // chr8 // 100 // 100 // 30 // 30 // 0 /// ENSMUST00000034136 // ENSEMBL // Alanine aminotransferase 2 gene:ENSMUSG00000031700 // chr8 // 100 // 100 // 30 // 30 // 0 /// BC034219 // GenBank // Mus musculus glutamic pyruvate transaminase (alanine aminotransferase) 2, mRNA (cDNA clone MGC:3…	Gpt2	0.00337676	1.9324	6.20426	0.265689	74.6574	13.3034	7.1482	0.302914	144.268	31.335	6.12668	6.35815	5.86681	6.46542	6.93379	6.88586	7.53959	7.23358	69.8737	82.0341	58.3562	88.3657	122.258	118.263	186.055	150.496
NM_178915 // Tmem179 // transmembrane protein 179 // 12 F1|12 // 104885 /// ENSMUST00000066791 // Tmem179 // transmembrane protein 179 // 12 F1|12 // 104885 /// BC046482 // Tmem179 // transmembrane protein 179 // 12 F1|12 // 104885	NM_178915 // RefSeq // Mus musculus transmembrane protein 179 (Tmem179), mRNA. // chr12 // 100 // 100 // 25 // 25 // 0 /// ENSMUST00000066791 // ENSEMBL // Transmembrane protein 179 gene:ENSMUSG00000054013 // chr12 // 100 // 100 // 25 // 25 // 0 /// BC046482 // GenBank // Mus musculus transmembrane protein 179, mRNA (cDNA clone MGC:51719 IMAGE:5357484), complete cds. // chr12 // 100 // 100 // 25 …	Tmem179	0.00291322	1.91157	6.20536	0.262185	74.7404	14.2515	7.13733	0.283276	142.872	28.8878	6.03343	6.23202	5.99042	6.56557	7.07059	6.82718	7.5116	7.13993	65.5001	75.1667	63.5765	94.7183	134.419	113.549	182.481	141.037
NM_011404 // Slc7a5 // solute carrier family 7 (cationic amino acid transporter, y+ system), member 5 // 8 E1|8 65.0 cM // 20539 /// ENSMUST00000045557 // Slc7a5 // solute carrier family 7 (cationic amino acid transporter, y+ system), member 5 // 8 E1|8 65.0 cM // 20539 /// BC026131 // Slc7a5 // solute carrier family 7 (cationic amino acid transporter, y+ system), member 5 // 8 E1|8 65.0 cM // 20…	NM_011404 // RefSeq // Mus musculus solute carrier family 7 (cationic amino acid transporter, y+ system), member 5 (Slc7a5), mRNA. // chr8 // 100 // 100 // 33 // 33 // 0 /// ENSMUST00000045557 // ENSEMBL // large neutral amino acids transporter small subunit 1 gene:ENSMUSG00000040010 // chr8 // 100 // 100 // 33 // 33 // 0 /// BC026131 // GenBank // Mus musculus solute carrier family 7 (cationic a…	Slc7a5	0.000496407	1.90122	9.45358	0.16526	704.58	79.7132	10.3755	0.21511	1339.56	199.552	9.25066	9.39802	9.53663	9.62901	10.2562	10.1429	10.6168	10.4861	609.155	674.661	742.695	791.808	1223.04	1130.6	1570.31	1434.3
NM_018861 // Slc1a4 // solute carrier family 1 (glutamate/neutral amino acid transporter), member 4 // 11 A3.1|11 10.92 cM // 55963 /// ENSMUST00000004634 // Slc1a4 // solute carrier family 1 (glutamate/neutral amino acid transporter), member 4 // 11 A3.1|11 10.92 cM // 55963 /// ENSMUST00000109594 // Slc1a4 // solute carrier family 1 (glutamate/neutral amino acid transporter), member 4 // 11 A3.…	NM_018861 // RefSeq // Mus musculus solute carrier family 1 (glutamate/neutral amino acid transporter), member 4 (Slc1a4), mRNA. // chr11 // 100 // 100 // 33 // 33 // 0 /// ENSMUST00000004634 // ENSEMBL // Neutral amino acid transporter A gene:ENSMUSG00000020142 // chr11 // 100 // 100 // 33 // 33 // 0 /// ENSMUST00000109594 // ENSEMBL // Neutral amino acid transporter A gene:ENSMUSG00000020142 //…	Slc1a4	0.00831847	1.8872	6.92436	0.202101	122.342	16.6646	7.80811	0.410292	230.884	63.5683	7.01271	7.13173	6.65818	6.89481	7.57311	7.35158	8.12033	8.18744	129.133	140.238	100.998	118.999	190.429	163.322	278.267	291.517
NM_144907 // Sesn2 // sestrin 2 // 4 D2.3|4 // 230784 /// ENSMUST00000030724 // Sesn2 // sestrin 2 // 4 D2.3|4 // 230784 /// BC005672 // Sesn2 // sestrin 2 // 4 D2.3|4 // 230784	NM_144907 // RefSeq // Mus musculus sestrin 2 (Sesn2), mRNA. // chr4 // 100 // 100 // 30 // 30 // 0 /// ENSMUST00000030724 // ENSEMBL // Sestrin-2 gene:ENSMUSG00000028893 // chr4 // 100 // 100 // 30 // 30 // 0 /// BC005672 // GenBank // Mus musculus sestrin 2, mRNA (cDNA clone MGC:11758 IMAGE:3153129), complete cds. // chr4 // 100 // 100 // 30 // 30 // 0	Sesn2	0.000503567	1.88474	7.65489	0.185972	202.831	27.2496	8.56828	0.194996	382.284	54.3247	7.63458	7.48634	7.58035	7.91829	8.49393	8.40346	8.85031	8.52543	198.718	179.314	191.387	241.904	360.518	338.604	461.538	368.477
NM_172632 // Mapk4 // mitogen-activated protein kinase 4 // 18 E2|18 // 225724 /// ENSMUST00000091851 // Mapk4 // mitogen-activated protein kinase 4 // 18 E2|18 // 225724 /// BC058942 // Mapk4 // mitogen-activated protein kinase 4 // 18 E2|18 // 225724 /// ENSMUST00000025442 // Mapk4 // mitogen-activated protein kinase 4 // 18 E2|18 // 225724 /// ENSMUST00000162863 // Mapk4 // mitogen-activated p…	NM_172632 // RefSeq // Mus musculus mitogen-activated protein kinase 4 (Mapk4), mRNA. // chr18 // 100 // 100 // 27 // 27 // 0 /// ENSMUST00000091851 // ENSEMBL // Mitogen-activated protein kinase 4 gene:ENSMUSG00000024558 // chr18 // 100 // 100 // 27 // 27 // 0 /// BC058942 // GenBank // Mus musculus mitogen-activated protein kinase 4, mRNA (cDNA clone MGC:66565 IMAGE:6821544), complete cds. // c…	Mapk4	0.00167065	1.87279	5.99124	0.291303	64.5682	12.5456	6.90989	0.176323	120.923	14.6986	5.62639	6.24481	5.88725	6.20652	6.70923	6.82419	7.00478	7.10135	49.3984	75.8358	59.1885	73.8499	104.635	113.315	128.425	137.315
NM_144906 // Sgip1 // SH3-domain GRB2-like (endophilin) interacting protein 1 // 4 C6|4 // 73094 /// ENSMUST00000080728 // Sgip1 // SH3-domain GRB2-like (endophilin) interacting protein 1 // 4 C6|4 // 73094 /// BC017596 // Sgip1 // SH3-domain GRB2-like (endophilin) interacting protein 1 // 4 C6|4 // 73094 /// AB262964 // Sgip1 // SH3-domain GRB2-like (endophilin) interacting protein 1 // 4 C6|4 /…	NM_144906 // RefSeq // Mus musculus SH3-domain GRB2-like (endophilin) interacting protein 1 (Sgip1), mRNA. // chr4 // 100 // 89 // 42 // 42 // 0 /// ENSMUST00000080728 // ENSEMBL // Isoform 1 of SH3-containing GRB2-like protein 3-interacting protein 1 gene:ENSMUSG00000028524 // chr4 // 100 // 89 // 42 // 42 // 0 /// BC017596 // GenBank // Mus musculus SH3-domain GRB2-like (endophilin) interacting…	Sgip1	0.00196153	1.85042	4.88643	0.118117	29.6502	2.34055	5.75228	0.309479	54.8653	12.2414	4.93099	4.71315	4.97872	4.92284	5.78683	5.43869	6.16462	5.61897	30.5054	26.2301	31.5316	30.3336	55.2089	43.3718	71.7357	49.1448
NM_013657 // Sema3c // sema domain, immunoglobulin domain (Ig), short basic domain, secreted, (semaphorin) 3C // 5 A3|5 // 20348 /// ENSMUST00000030568 // Sema3c // sema domain, immunoglobulin domain (Ig), short basic domain, secreted, (semaphorin) 3C // 5 A3|5 // 20348 /// BC066852 // Sema3c // sema domain, immunoglobulin domain (Ig), short basic domain, secreted, (semaphorin) 3C // 5 A3|5 // 20…	NM_013657 // RefSeq // Mus musculus sema domain, immunoglobulin domain (Ig), short basic domain, secreted, (semaphorin) 3C (Sema3c), mRNA. // chr5 // 100 // 100 // 35 // 35 // 0 /// ENSMUST00000030568 // ENSEMBL // Sema domain, immunoglobulin domain (Ig), short basic domain, secreted, (Semaphorin) 3C, isoform CRA_b gene:ENSMUSG00000028780 // chr5 // 100 // 100 // 35 // 35 // 0 /// BC066852 // Gen…	Sema3c	0.00248228	1.79042	4.67384	0.166089	25.6521	2.95063	5.50065	0.286926	45.9279	8.67357	4.48231	4.60678	4.86695	4.73931	5.57221	5.10722	5.79439	5.52877	22.3517	24.3658	29.1809	26.7101	47.5775	34.4688	55.4989	46.1665
NM_133655 // Cd81 // CD81 antigen // 7 F5|7 69.3 cM // 12520 /// ENSMUST00000037941 // Cd81 // CD81 antigen // 7 F5|7 69.3 cM // 12520 /// BC011433 // Cd81 // CD81 antigen // 7 F5|7 69.3 cM // 12520	NM_133655 // RefSeq // Mus musculus CD81 antigen (Cd81), mRNA. // chr7 // 100 // 100 // 32 // 32 // 0 /// ENSMUST00000037941 // ENSEMBL // CD81 antigen gene:ENSMUSG00000037706 // chr7 // 100 // 100 // 32 // 32 // 0 /// BC011433 // GenBank // Mus musculus CD81 antigen, mRNA (cDNA clone MGC:6316 IMAGE:2811801), complete cds. // chr7 // 100 // 100 // 32 // 32 // 0 /// ENSMUST00000141954 // ENSEMBL /…	Cd81	0.000177802	1.77815	9.81575	0.151839	905.009	96.3586	10.6473	0.134613	1609.24	155.349	9.66835	9.87183	10.003	9.71977	10.6091	10.5295	10.8412	10.6096	813.698	936.95	1026.17	843.221	1561.9	1478.03	1834.54	1562.5
NM_139140 // Spats2 // spermatogenesis associated, serine-rich 2 // 15 F1|15 // 72572 /// ENSMUST00000063517 // Spats2 // spermatogenesis associated, serine-rich 2 // 15 F1|15 // 72572 /// BC072579 // Spats2 // spermatogenesis associated, serine-rich 2 // 15 F1|15 // 72572	NM_139140 // RefSeq // Mus musculus spermatogenesis associated, serine-rich 2 (Spats2), mRNA. // chr15 // 100 // 92 // 36 // 36 // 0 /// ENSMUST00000063517 // ENSEMBL // Isoform 1 of Spermatogenesis-associated serine-rich protein 2 gene:ENSMUSG00000051934 // chr15 // 100 // 100 // 39 // 39 // 0 /// BC072579 // GenBank // Mus musculus spermatogenesis associated, serine-rich 2, mRNA (cDNA clone IMA…	Spats2	0.00539965	1.75126	6.52253	0.193132	92.5594	12.544	7.31469	0.319184	162.096	34.9844	6.31303	6.57249	6.43986	6.76476	7.24994	6.91218	7.67134	7.42528	79.508	95.1736	86.814	108.742	152.212	120.441	203.847	171.883
NM_008638 // Mthfd2 // methylenetetrahydrofolate dehydrogenase (NAD+ dependent), methenyltetrahydrofolate cyclohydrolase // 6 C3|6 35.15 cM // 17768 /// ENSMUST00000005810 // Mthfd2 // methylenetetrahydrofolate dehydrogenase (NAD+ dependent), methenyltetrahydrofolate cyclohydrolase // 6 C3|6 35.15 cM // 17768 /// BC019511 // Mthfd2 // methylenetetrahydrofolate dehydrogenase (NAD+ dependent), meth…	NM_008638 // RefSeq // Mus musculus methylenetetrahydrofolate dehydrogenase (NAD+ dependent), methenyltetrahydrofolate cyclohydrolase (Mthfd2), nuclear gene encoding mitochondrial protein, mRNA. // chr6 // 100 // 100 // 26 // 26 // 0 /// ENSMUST00000005810 // ENSEMBL // Bifunctional methylenetetrahydrofolate dehydrogenase/cyclohydrolase, mitochondrial gene:ENSMUSG00000005667 // chr6 // 100 // 100…	Mthfd2	0.0096249	1.73128	7.97511	0.156489	252.745	27.8406	8.7367	0.376026	437.572	113.483	7.81036	7.9078	8.00494	8.17735	8.35293	8.4926	9.15118	8.95007	224.466	240.15	256.878	289.486	326.95	360.187	568.565	494.584
NM_010849 // Myc // myelocytomatosis oncogene // 15 D2-D3|15 32.0 cM // 17869 /// NM_001177352 // Myc // myelocytomatosis oncogene // 15 D2-D3|15 32.0 cM // 17869 /// NM_001177353 // Myc // myelocytomatosis oncogene // 15 D2-D3|15 32.0 cM // 17869 /// NM_001177354 // Myc // myelocytomatosis oncogene // 15 D2-D3|15 32.0 cM // 17869 /// ENSMUST00000161976 // Myc // myelocytomatosis oncogene // 15 D…	NM_010849 // RefSeq // Mus musculus myelocytomatosis oncogene (Myc), transcript variant 1, mRNA. // chr15 // 100 // 100 // 25 // 25 // 0 /// NM_001177352 // RefSeq // Mus musculus myelocytomatosis oncogene (Myc), transcript variant 1, mRNA. // chr15 // 100 // 100 // 25 // 25 // 0 /// NM_001177353 // RefSeq // Mus musculus myelocytomatosis oncogene (Myc), transcript variant 2, mRNA. // chr15 // 10…	Myc	0.00316524	1.72187	5.92114	0.129188	60.7751	5.3055	6.68572	0.295016	104.647	22.8635	5.91437	6.04215	5.98415	5.74391	7.10443	6.67852	6.50297	6.45696	60.3118	65.8974	63.3005	53.5907	137.609	102.432	90.6959	87.8493
NM_145154 // Angptl6 // angiopoietin-like 6 // 9 A3|9 // 70726 /// NM_175687 // A230050P20Rik // RIKEN cDNA A230050P20 gene // 9 A3|9 // 319278 /// ENSMUST00000043726 // Angptl6 // angiopoietin-like 6 // 9 A3|9 // 70726 /// ENSMUST00000043911 // A230050P20Rik // RIKEN cDNA A230050P20 gene // 9 A3|9 // 319278 /// BC025904 // Angptl6 // angiopoietin-like 6 // 9 A3|9 // 70726 /// BC031510 // A230050…	NM_145154 // RefSeq // Mus musculus angiopoietin-like 6 (Angptl6), mRNA. // chr9 // 100 // 100 // 28 // 28 // 0 /// NM_175687 // RefSeq // Mus musculus RIKEN cDNA A230050P20 gene (A230050P20Rik), mRNA. // chr9 // 100 // 18 // 5 // 5 // 0 /// ENSMUST00000043726 // ENSEMBL // Angiopoietin-related protein 6 gene:ENSMUSG00000038742 // chr9 // 100 // 100 // 28 // 28 // 0 /// ENSMUST00000043911 // ENSE…	Angptl6	0.00135584	1.71722	6.14949	0.0933854	71.0981	4.55051	6.91475	0.255827	122.091	21.7326	6.20905	6.12077	6.23731	6.03084	6.70748	7.06262	7.19916	6.68974	73.9792	69.588	75.4426	65.3827	104.508	133.678	146.947	103.232
NM_001080943 // Zdhhc22 // zinc finger, DHHC-type containing 22 // 12 D2|12 // 238331 /// ENSMUST00000095521 // Zdhhc22 // zinc finger, DHHC-type containing 22 // 12 D2|12 // 238331 /// BC128021 // Zdhhc22 // zinc finger, DHHC-type containing 22 // 12 D2|12 // 238331 /// ENSMUST00000057205 // Zdhhc22 // zinc finger, DHHC-type containing 22 // 12 D2|12 // 238331	NM_001080943 // RefSeq // Mus musculus zinc finger, DHHC-type containing 22 (Zdhhc22), mRNA. // chr12 // 100 // 40 // 10 // 10 // 0 /// ENSMUST00000095521 // ENSEMBL // Putative palmitoyltransferase ZDHHC22 gene:ENSMUSG00000048483 // chr12 // 100 // 40 // 10 // 10 // 0 /// BC128021 // GenBank // Mus musculus zinc finger, DHHC-type containing 22, mRNA (cDNA clone MGC:157624 IMAGE:40136338), comple…	Zdhhc22	0.00792219	1.69294	7.04149	0.282264	133.711	27.6235	7.80458	0.270072	226.365	38.9173	7.43414	6.8952	7.04696	6.78967	7.90514	8.01793	7.40897	7.88629	172.941	119.031	132.235	110.635	239.709	259.202	169.95	236.598
NM_001177841 // Otub2 // OTU domain, ubiquitin aldehyde binding 2 // 12 E|12 // 68149 /// NM_026580 // Otub2 // OTU domain, ubiquitin aldehyde binding 2 // 12 E|12 // 68149 /// NR_033587 // Otub2 // OTU domain, ubiquitin aldehyde binding 2 // 12 E|12 // 68149 /// ENSMUST00000021620 // Otub2 // OTU domain, ubiquitin aldehyde binding 2 // 12 E|12 // 68149 /// BC049551 // Otub2 // OTU domain, ubiqui…	NM_001177841 // RefSeq // Mus musculus OTU domain, ubiquitin aldehyde binding 2 (Otub2), transcript variant 1, mRNA. // chr12 // 100 // 100 // 30 // 30 // 0 /// NM_026580 // RefSeq // Mus musculus OTU domain, ubiquitin aldehyde binding 2 (Otub2), transcript variant 2, mRNA. // chr12 // 100 // 100 // 30 // 30 // 0 /// NR_033587 // RefSeq // Mus musculus OTU domain, ubiquitin aldehyde binding 2 (Ot…	Otub2	0.00114625	1.68008	6.38066	0.144437	83.6394	8.43786	7.12277	0.21097	140.521	21.3727	6.45036	6.55048	6.25075	6.27105	6.99937	6.939	7.41302	7.13967	87.4483	93.7325	76.149	77.2278	127.944	122.701	170.428	141.012
NM_177780 // Dock5 // dedicator of cytokinesis 5 // 14 D1|14 // 68813 /// ENSMUST00000039135 // Dock5 // dedicator of cytokinesis 5 // 14 D1|14 // 68813 /// BC158046 // Dock5 // dedicator of cytokinesis 5 // 14 D1|14 // 68813	NM_177780 // RefSeq // Mus musculus dedicator of cytokinesis 5 (Dock5), mRNA. // chr14 // 100 // 98 // 52 // 52 // 0 /// ENSMUST00000039135 // ENSEMBL // Dedicator of cytokinesis protein 5 gene:ENSMUSG00000044447 // chr14 // 100 // 98 // 52 // 52 // 0 /// BC158046 // GenBank // Mus musculus dedicator of cytokinesis 5, mRNA (cDNA clone MGC:189851 IMAGE:9007351), complete cds. // chr14 // 100 // 92…	Dock5	7.52309e-05	1.67144	6.07851	0.0958702	67.6908	4.46959	6.81807	0.121628	113.141	9.79023	5.96509	6.03519	6.14026	6.17349	6.81079	6.70648	6.98888	6.76612	62.4701	65.5804	70.5345	72.178	112.267	104.436	127.017	108.844
NM_172768 // Gramd1b // GRAM domain containing 1B // 9|9 B // 235283 /// ENSMUST00000045682 // Gramd1b // GRAM domain containing 1B // 9|9 B // 235283 /// BC070451 // Gramd1b // GRAM domain containing 1B // 9|9 B // 235283 /// ENSMUST00000121357 // Gramd1b // GRAM domain containing 1B // 9|9 B // 235283 /// ENSMUST00000118159 // Gramd1b // GRAM domain containing 1B // 9|9 B // 235283 /// ENSMUST0…	NM_172768 // RefSeq // Mus musculus GRAM domain containing 1B (Gramd1b), mRNA. // chr9 // 100 // 90 // 38 // 38 // 0 /// ENSMUST00000045682 // ENSEMBL // Isoform 4 of GRAM domain-containing protein 1B gene:ENSMUSG00000040111 // chr9 // 100 // 90 // 38 // 38 // 0 /// BC070451 // GenBank // Mus musculus GRAM domain containing 1B, mRNA (cDNA clone MGC:99432 IMAGE:30616509), complete cds. // chr9 // …	Gramd1b	7.25382e-05	1.66513	6.4615	0.131416	88.3932	7.71594	7.19984	0.0795642	147.186	8.21721	6.495	6.26764	6.53052	6.55283	7.15506	7.12531	7.21307	7.30593	90.1968	77.0454	92.445	93.8854	142.524	139.615	148.371	158.236
NM_007471 // App // amyloid beta (A4) precursor protein // 16 C3-qter|16 56.0 cM // 11820 /// ENSMUST00000005406 // App // amyloid beta (A4) precursor protein // 16 C3-qter|16 56.0 cM // 11820 /// BC070409 // App // amyloid beta (A4) precursor protein // 16 C3-qter|16 56.0 cM // 11820 /// ENSMUST00000074271 // App // amyloid beta (A4) precursor protein // 16 C3-qter|16 56.0 cM // 11820 /// ENSMUS…	NM_007471 // RefSeq // Mus musculus amyloid beta (A4) precursor protein (App), mRNA. // chr16 // 100 // 90 // 37 // 37 // 0 /// ENSMUST00000005406 // ENSEMBL // Isoform APP695 of Amyloid beta A4 protein (Fragment) gene:ENSMUSG00000022892 // chr16 // 100 // 90 // 37 // 37 // 0 /// BC070409 // GenBank // Mus musculus amyloid beta (A4) precursor protein, mRNA (cDNA clone MGC:95575 IMAGE:5708093), co…	App	0.000383629	1.65389	10.7119	0.152065	1684.15	175.037	11.4389	0.135975	2785.4	257.046	10.5143	10.7458	10.7049	10.8825	11.437	11.2556	11.58	11.4831	1462.53	1717.14	1669.11	1887.83	2772.61	2444.93	3061.39	2862.66
NM_023377 // Stard5 // StAR-related lipid transfer (START) domain containing 5 // 7 D3|7 41.2 cM // 170460 /// ENSMUST00000075418 // Stard5 // StAR-related lipid transfer (START) domain containing 5 // 7 D3|7 41.2 cM // 170460 /// BC058226 // Stard5 // StAR-related lipid transfer (START) domain containing 5 // 7 D3|7 41.2 cM // 170460	NM_023377 // RefSeq // Mus musculus StAR-related lipid transfer (START) domain containing 5 (Stard5), mRNA. // chr7 // 100 // 100 // 28 // 28 // 0 /// ENSMUST00000075418 // ENSEMBL // StAR-related lipid transfer protein 5 gene:ENSMUSG00000046027 // chr7 // 100 // 100 // 28 // 28 // 0 /// BC058226 // GenBank // Mus musculus StAR-related lipid transfer (START) domain containing 5, mRNA (cDNA clone …	Stard5	0.000960346	1.65264	8.07322	0.0918335	269.73	16.6262	8.78763	0.219503	445.766	67.6211	8.11241	7.93581	8.12773	8.11694	8.60762	8.59029	8.94472	9.0079	276.745	244.86	279.699	277.615	390.078	385.421	492.752	514.812
NM_019581 // Gtpbp2 // GTP binding protein 2 // 17|17 C-D // 56055 /// NM_001145979 // Gtpbp2 // GTP binding protein 2 // 17|17 C-D // 56055 /// ENSMUST00000024748 // Gtpbp2 // GTP binding protein 2 // 17|17 C-D // 56055 /// BC049089 // Gtpbp2 // GTP binding protein 2 // 17|17 C-D // 56055	NM_019581 // RefSeq // Mus musculus GTP binding protein 2 (Gtpbp2), transcript variant 1, mRNA. // chr17 // 100 // 96 // 26 // 26 // 0 /// NM_001145979 // RefSeq // Mus musculus GTP binding protein 2 (Gtpbp2), transcript variant 2, mRNA. // chr17 // 100 // 96 // 26 // 26 // 0 /// ENSMUST00000024748 // ENSEMBL // GTP-binding protein 2 gene:ENSMUSG00000023952 // chr17 // 100 // 96 // 26 // 26 // 0 …	Gtpbp2	8.915e-05	1.64629	7.87103	0.0498594	234.213	8.08776	8.58552	0.145884	385.583	37.3656	7.8734	7.87018	7.80925	7.93132	8.63704	8.62521	8.70644	8.3734	234.492	233.97	224.294	244.098	398.114	394.863	417.734	331.622
NM_024250 // Phf10 // PHD finger protein 10 // 17|17 A2 // 72057 /// NM_001083881 // 1600012H06Rik // RIKEN cDNA 1600012H06 gene // 17 A2|17 // 67912 /// NM_026451 // 1600012H06Rik // RIKEN cDNA 1600012H06 gene // 17 A2|17 // 67912 /// NM_001083880 // 1600012H06Rik // RIKEN cDNA 1600012H06 gene // 17 A2|17 // 67912 /// NM_001083882 // 1600012H06Rik // RIKEN cDNA 1600012H06 gene // 17 A2|17 // 679…	NM_024250 // RefSeq // Mus musculus PHD finger protein 10 (Phf10), mRNA. // chr17 // 100 // 100 // 33 // 33 // 0 /// NM_001083881 // RefSeq // Mus musculus RIKEN cDNA 1600012H06 gene (1600012H06Rik), transcript variant 1, mRNA. // chr17 // 100 // 9 // 3 // 3 // 0 /// NM_026451 // RefSeq // Mus musculus RIKEN cDNA 1600012H06 gene (1600012H06Rik), transcript variant 2, mRNA. // chr17 // 100 // 9 //…	Phf10	0.00343394	1.63996	6.72689	0.102373	106.128	7.74348	7.42302	0.280048	174.046	33.6321	6.68499	6.8755	6.7044	6.64267	7.33386	7.09082	7.75245	7.51495	102.892	117.418	104.286	99.9179	161.329	136.317	215.635	182.904
NM_007837 // Ddit3 // DNA-damage inducible transcript 3 // 10 D3|10 // 13198 /// NM_001171582 // Mars // methionine-tRNA synthetase // 10 D3|10 // 216443 /// NM_001003913 // Mars // methionine-tRNA synthetase // 10 D3|10 // 216443 /// ENSMUST00000026475 // Ddit3 // DNA-damage inducible transcript 3 // 10 D3|10 // 13198 /// ENSMUST00000037290 // Mars // methionine-tRNA synthetase // 10 D3|10 // 21…	NM_007837 // RefSeq // Mus musculus DNA-damage inducible transcript 3 (Ddit3), mRNA. // chr10 // 100 // 100 // 25 // 25 // 0 /// NM_001171582 // RefSeq // Mus musculus methionine-tRNA synthetase (Mars), transcript variant 1, mRNA. // chr10 // 100 // 12 // 3 // 3 // 0 /// NM_001003913 // RefSeq // Mus musculus methionine-tRNA synthetase (Mars), transcript variant 2, mRNA. // chr10 // 100 // 12 // …	Ddit3	0.000587587	1.63989	6.29596	0.201391	79.1381	10.7296	7.01792	0.0865124	129.778	8.00954	6.40838	6.49089	6.25141	6.03317	6.96653	6.98054	7.14738	6.97723	84.9402	89.9398	76.1838	65.4887	125.064	126.285	141.767	125.996
NM_001018013 // Izumo1 // izumo sperm-egg fusion 1 // 7 B4|7 // 73456 /// AB195681 // Izumo1 // izumo sperm-egg fusion 1 // 7 B4|7 // 73456 /// ENSMUST00000033100 // Izumo1 // izumo sperm-egg fusion 1 // 7 B4|7 // 73456	NM_001018013 // RefSeq // Mus musculus izumo sperm-egg fusion 1 (Izumo1), mRNA. // chr7 // 100 // 90 // 27 // 27 // 0 /// AB195681 // GenBank // Mus musculus mRNA for Izumo, complete cds. // chr7 // 100 // 90 // 27 // 27 // 0 /// ENSMUST00000033100 // ENSEMBL // Izumo sperm-egg fusion protein 1 gene:ENSMUSG00000064158 // chr7 // 100 // 90 // 27 // 27 // 0 /// ENSMUST00000130327 // ENSEMBL // cdna…	Izumo1	0.00231006	1.63513	3.96521	0.108524	15.6522	1.18868	4.66069	0.252545	25.5934	4.65724	3.90348	3.8566	3.99933	4.10145	4.54089	4.41616	4.68344	5.00226	14.9646	14.4861	15.9925	17.1656	23.2778	21.3499	25.6955	32.0502
NM_173867 // Rcc2 // regulator of chromosome condensation 2 // 4 D3|4 // 108911 /// ENSMUST00000071169 // Rcc2 // regulator of chromosome condensation 2 // 4 D3|4 // 108911 /// ENSMUST00000038893 // Rcc2 // regulator of chromosome condensation 2 // 4 D3|4 // 108911 /// BC086666 // Rcc2 // regulator of chromosome condensation 2 // 4 D3|4 // 108911 /// ENSMUST00000138808 // Rcc2 // regulator of chr…	NM_173867 // RefSeq // Mus musculus regulator of chromosome condensation 2 (Rcc2), mRNA. // chr4 // 100 // 88 // 30 // 30 // 0 /// ENSMUST00000071169 // ENSEMBL // Protein RCC2 gene:ENSMUSG00000040945 // chr4 // 100 // 100 // 34 // 34 // 0 /// ENSMUST00000038893 // ENSEMBL // Protein RCC2 gene:ENSMUSG00000040945 // chr4 // 100 // 82 // 28 // 28 // 0 /// BC086666 // GenBank // Mus musculus regulat…	Rcc2	0.000768628	1.63468	9.1317	0.109149	562.157	43.1344	9.83412	0.195923	918.944	119.816	9.0217	9.14909	9.08042	9.27561	9.82963	9.56362	10.0172	9.92605	519.76	567.74	541.351	619.778	909.944	756.722	1036.27	972.837
NM_001170912 // Trim66 // tripartite motif-containing 66 // 7 E3|7 51.54 cM // 330627 /// NM_181853 // Trim66 // tripartite motif-containing 66 // 7 E3|7 51.54 cM // 330627 /// NM_001170913 // Trim66 // tripartite motif-containing 66 // 7 E3|7 51.54 cM // 330627 /// ENSMUST00000033339 // Trim66 // tripartite motif-containing 66 // 7 E3|7 51.54 cM // 330627 /// AY572454 // Trim66 // tripartite mot…	NM_001170912 // RefSeq // Mus musculus tripartite motif-containing 66 (Trim66), transcript variant 1, mRNA. // chr7 // 100 // 96 // 44 // 44 // 0 /// NM_181853 // RefSeq // Mus musculus tripartite motif-containing 66 (Trim66), transcript variant 2, mRNA. // chr7 // 100 // 91 // 42 // 42 // 0 /// NM_001170913 // RefSeq // Mus musculus tripartite motif-containing 66 (Trim66), transcript variant 3, …	Trim66	0.000279326	1.62963	5.22729	0.115146	37.5496	2.98699	5.92955	0.145986	61.192	6.49264	5.20204	5.08615	5.36232	5.25864	5.84228	5.87104	6.14782	5.85707	36.8104	33.969	41.1358	38.2832	57.3721	58.5273	70.9053	57.9635
NM_177343 // Camk1d // calcium/calmodulin-dependent protein kinase ID // 2 A1|2 // 227541 /// ENSMUST00000044009 // Camk1d // calcium/calmodulin-dependent protein kinase ID // 2 A1|2 // 227541 /// BC141413 // Camk1d // calcium/calmodulin-dependent protein kinase ID // 2 A1|2 // 227541 /// ENSMUST00000114987 // Camk1d // calcium/calmodulin-dependent protein kinase ID // 2 A1|2 // 227541 /// ENSMUS…	NM_177343 // RefSeq // Mus musculus calcium/calmodulin-dependent protein kinase ID (Camk1d), mRNA. // chr2 // 100 // 94 // 30 // 30 // 0 /// ENSMUST00000044009 // ENSEMBL // Isoform 1 of Calcium/calmodulin-dependent protein kinase type 1D gene:ENSMUSG00000039145 // chr2 // 100 // 94 // 30 // 30 // 0 /// BC141413 // GenBank // Mus musculus calcium/calmodulin-dependent protein kinase ID, mRNA (cDNA…	Camk1d	0.00866852	1.62675	5.35517	0.139503	41.0755	3.93768	6.03448	0.326241	66.8194	15.121	5.28968	5.44384	5.49518	5.19199	5.79445	5.72506	6.3958	6.22261	39.1159	43.5271	45.104	36.5548	55.5014	52.8952	84.2031	74.6781
NM_001024617 // Inpp4b // inositol polyphosphate-4-phosphatase, type II // 8 C2|8 38.0 cM // 234515 /// ENSMUST00000042529 // Inpp4b // inositol polyphosphate-4-phosphatase, type II // 8 C2|8 38.0 cM // 234515 /// ENSMUST00000109851 // Inpp4b // inositol polyphosphate-4-phosphatase, type II // 8 C2|8 38.0 cM // 234515 /// DQ296613 // Inpp4b // inositol polyphosphate-4-phosphatase, type II // 8 C2…	NM_001024617 // RefSeq // Mus musculus inositol polyphosphate-4-phosphatase, type II (Inpp4b), mRNA. // chr8 // 100 // 92 // 46 // 46 // 0 /// ENSMUST00000042529 // ENSEMBL // Type II inositol-3,4-bisphosphate 4-phosphatase gene:ENSMUSG00000037940 // chr8 // 100 // 92 // 46 // 46 // 0 /// ENSMUST00000109851 // ENSEMBL // Type II inositol-3,4-bisphosphate 4-phosphatase gene:ENSMUSG00000037940 // c…	Inpp4b	0.00705979	1.62267	4.57112	0.216568	23.9743	3.64489	5.26281	0.268832	38.9025	7.35509	4.37637	4.66736	4.40982	4.83092	5.37729	5.00886	5.587	5.0781	20.7691	25.4107	21.2564	28.4612	41.5648	32.1971	48.0678	33.7801
NM_013666 // St8sia5 // ST8 alpha-N-acetyl-neuraminide alpha-2,8-sialyltransferase 5 // 18 E3|18 // 225742 /// NM_153124 // St8sia5 // ST8 alpha-N-acetyl-neuraminide alpha-2,8-sialyltransferase 5 // 18 E3|18 // 225742 /// ENSMUST00000079618 // St8sia5 // ST8 alpha-N-acetyl-neuraminide alpha-2,8-sialyltransferase 5 // 18 E3|18 // 225742 /// BC034855 // St8sia5 // ST8 alpha-N-acetyl-neuraminide alp…	NM_013666 // RefSeq // Mus musculus ST8 alpha-N-acetyl-neuraminide alpha-2,8-sialyltransferase 5 (St8sia5), transcript variant 1, mRNA. // chr18 // 100 // 100 // 32 // 32 // 0 /// NM_153124 // RefSeq // Mus musculus ST8 alpha-N-acetyl-neuraminide alpha-2,8-sialyltransferase 5 (St8sia5), transcript variant 2, mRNA. // chr18 // 100 // 91 // 29 // 29 // 0 /// ENSMUST00000079618 // ENSEMBL // alpha-2…	St8sia5	0.00483646	1.61894	7.45096	0.173069	175.944	22.02	8.13696	0.263907	284.842	47.5882	7.43797	7.3119	7.35554	7.69844	8.24012	7.74552	8.32303	8.23918	173.401	158.892	163.771	207.712	302.36	214.602	320.245	302.162
NM_007392 // Acta2 // actin, alpha 2, smooth muscle, aorta // 19|19 C3 // 11475 /// ENSMUST00000039631 // Acta2 // actin, alpha 2, smooth muscle, aorta // 19|19 C3 // 11475 /// BC064800 // Acta2 // actin, alpha 2, smooth muscle, aorta // 19|19 C3 // 11475	NM_007392 // RefSeq // Mus musculus actin, alpha 2, smooth muscle, aorta (Acta2), mRNA. // chr19 // 100 // 100 // 27 // 27 // 0 /// ENSMUST00000039631 // ENSEMBL // Actin, aortic smooth muscle gene:ENSMUSG00000035783 // chr19 // 100 // 89 // 24 // 24 // 0 /// BC064800 // GenBank // Mus musculus actin, alpha 2, smooth muscle, aorta, mRNA (cDNA clone MGC:76776 IMAGE:30054569), complete cds. // chr1…	Acta2	0.00126163	1.60445	7.0399	0.173033	132.326	16.6857	7.72287	0.165867	212.31	24.4348	7.2943	6.98825	6.96919	6.90786	7.63839	7.54055	7.91357	7.79898	156.965	126.961	125.296	120.081	199.244	186.179	241.113	222.704
NM_007904 // Ednrb // endothelin receptor type B // 14 E2.3|14 51.0 cM // 13618 /// NM_001136061 // Ednrb // endothelin receptor type B // 14 E2.3|14 51.0 cM // 13618 /// ENSMUST00000022718 // Ednrb // endothelin receptor type B // 14 E2.3|14 51.0 cM // 13618 /// BC026553 // Ednrb // endothelin receptor type B // 14 E2.3|14 51.0 cM // 13618 /// ENSMUST00000088530 // Ednrb // endothelin receptor t…	NM_007904 // RefSeq // Mus musculus endothelin receptor type B (Ednrb), transcript variant 1, mRNA. // chr14 // 100 // 87 // 26 // 26 // 0 /// NM_001136061 // RefSeq // Mus musculus endothelin receptor type B (Ednrb), transcript variant 2, mRNA. // chr14 // 100 // 83 // 25 // 25 // 0 /// ENSMUST00000022718 // ENSEMBL // Endothelin B receptor gene:ENSMUSG00000022122 // chr14 // 100 // 83 // 25 // …	Ednrb	0.00553378	1.60147	6.18213	0.263679	73.5107	13.073	6.86992	0.191049	117.725	15.2771	6.08748	6.44323	5.85643	6.3414	6.63715	6.7902	7.01766	7.03465	68.0009	87.0174	57.9376	81.0868	99.5364	110.676	129.576	131.112
NM_001110222 // Dcx // doublecortin // X F2|X // 13193 /// NM_001110223 // Dcx // doublecortin // X F2|X // 13193 /// NM_001110224 // Dcx // doublecortin // X F2|X // 13193 /// NM_010025 // Dcx // doublecortin // X F2|X // 13193 /// ENSMUST00000033642 // Dcx // doublecortin // X F2|X // 13193 /// ENSMUST00000087313 // Dcx // doublecortin // X F2|X // 13193 /// AB011678 // Dcx // doublecortin // X…	NM_001110222 // RefSeq // Mus musculus doublecortin (Dcx), transcript variant 1, mRNA. // chrX // 100 // 85 // 29 // 29 // 0 /// NM_001110223 // RefSeq // Mus musculus doublecortin (Dcx), transcript variant 2, mRNA. // chrX // 100 // 82 // 28 // 28 // 0 /// NM_001110224 // RefSeq // Mus musculus doublecortin (Dcx), transcript variant 3, mRNA. // chrX // 100 // 82 // 28 // 28 // 0 /// NM_010025 //…	Dcx	0.00617337	1.59608	6.45945	0.0740639	88.0872	4.46933	7.11205	0.307529	140.594	27.7522	6.46325	6.47901	6.35892	6.5366	7.39038	6.67639	7.14553	7.23588	88.2335	89.2022	82.0777	92.8355	167.775	102.281	141.586	150.736
NM_199022 // Shc4 // SHC (Src homology 2 domain containing) family, member 4 // 2 F1|2 // 271849 /// ENSMUST00000042246 // Shc4 // SHC (Src homology 2 domain containing) family, member 4 // 2 F1|2 // 271849 /// AY464564 // Shc4 // SHC (Src homology 2 domain containing) family, member 4 // 2 F1|2 // 271849 /// ENSMUST00000110480 // Shc4 // SHC (Src homology 2 domain containing) family, member 4 //…	NM_199022 // RefSeq // Mus musculus SHC (Src homology 2 domain containing) family, member 4 (Shc4), mRNA. // chr2 // 100 // 100 // 28 // 28 // 0 /// ENSMUST00000042246 // ENSEMBL // SHC-transforming protein 4 gene:ENSMUSG00000035109 // chr2 // 100 // 93 // 26 // 26 // 0 /// AY464564 // GenBank // Mus musculus rai-like protein RaLP mRNA, complete cds. // chr2 // 100 // 86 // 24 // 24 // 0 /// ENSM…	Shc4	0.00489988	1.59436	5.42443	0.0732237	42.9875	2.22679	6.07694	0.291975	68.5378	13.6259	5.53102	5.36414	5.39843	5.40414	5.98791	5.71981	6.19818	6.40187	46.2386	41.1877	42.1782	42.3456	63.4658	52.703	73.4242	84.5581
NM_012055 // Asns // asparagine synthetase // 6 A1|6 // 27053 /// ENSMUST00000031766 // Asns // asparagine synthetase // 6 A1|6 // 27053 /// ENSMUST00000115542 // Asns // asparagine synthetase // 6 A1|6 // 27053 /// U38940 // Asns // asparagine synthetase // 6 A1|6 // 27053	NM_012055 // RefSeq // Mus musculus asparagine synthetase (Asns), mRNA. // chr6 // 100 // 100 // 35 // 35 // 0 /// ENSMUST00000031766 // ENSEMBL // Asparagine synthetase [glutamine-hydrolyzing] gene:ENSMUSG00000029752 // chr6 // 100 // 100 // 35 // 35 // 0 /// ENSMUST00000115542 // ENSEMBL // Asparagine synthetase [glutamine-hydrolyzing] gene:ENSMUSG00000029752 // chr6 // 100 // 94 // 33 // 33 //…	Asns	0.00487301	1.59406	10.8165	0.0888111	1805.93	112.144	11.4699	0.287701	2878.75	565.814	10.7308	10.8448	10.9284	10.7619	11.3216	11.1443	11.6434	11.7703	1699.33	1839.17	1948.84	1736.38	2559.44	2263.48	3199.1	3493
NM_001146350 // Eng // endoglin // 2 B|2 21.4 cM // 13805 /// NM_007932 // Eng // endoglin // 2 B|2 21.4 cM // 13805 /// NM_001146348 // Eng // endoglin // 2 B|2 21.4 cM // 13805 /// ENSMUST00000009705 // Eng // endoglin // 2 B|2 21.4 cM // 13805 /// ENSMUST00000113272 // Eng // endoglin // 2 B|2 21.4 cM // 13805 /// BC029080 // Eng // endoglin // 2 B|2 21.4 cM // 13805 /// ENSMUST00000156306 // …	NM_001146350 // RefSeq // Mus musculus endoglin (Eng), transcript variant 2, mRNA. // chr2 // 100 // 100 // 31 // 31 // 0 /// NM_007932 // RefSeq // Mus musculus endoglin (Eng), transcript variant 1, mRNA. // chr2 // 100 // 94 // 29 // 29 // 0 /// NM_001146348 // RefSeq // Mus musculus endoglin (Eng), transcript variant 3, mRNA. // chr2 // 100 // 94 // 29 // 29 // 0 /// ENSMUST00000009705 // ENSE…	Eng	0.000253504	1.5928	7.86036	0.142164	233.204	21.9436	8.53423	0.102565	371.448	27.1198	7.93336	7.96022	7.65066	7.89719	8.52535	8.45579	8.68161	8.47418	244.443	249.037	200.945	238.392	368.457	351.113	410.606	355.616
NM_028994 // Pck2 // phosphoenolpyruvate carboxykinase 2 (mitochondrial) // 14 C1|14 21.0 cM // 74551 /// ENSMUST00000048781 // Pck2 // phosphoenolpyruvate carboxykinase 2 (mitochondrial) // 14 C1|14 21.0 cM // 74551 /// BC010318 // Pck2 // phosphoenolpyruvate carboxykinase 2 (mitochondrial) // 14 C1|14 21.0 cM // 74551	NM_028994 // RefSeq // Mus musculus phosphoenolpyruvate carboxykinase 2 (mitochondrial) (Pck2), nuclear gene encoding mitochondrial protein, mRNA. // chr14 // 100 // 95 // 36 // 36 // 0 /// ENSMUST00000048781 // ENSEMBL // phosphoenolpyruvate carboxykinase [GTP], mitochondrial gene:ENSMUSG00000040618 // chr14 // 100 // 95 // 36 // 36 // 0 /// BC010318 // GenBank // Mus musculus phosphoenolpyruvat…	Pck2	0.000472454	1.59026	8.67852	0.0510332	409.917	14.3255	9.33944	0.185808	651.873	84.5025	8.70825	8.67849	8.60671	8.72062	9.26255	9.1321	9.56605	9.39705	418.257	409.719	389.832	421.861	614.193	561.094	757.998	674.208
NM_001081056 // Xpot // exportin, tRNA (nuclear export receptor for tRNAs) // 10|10 D3 // 73192 /// ENSMUST00000039810 // Xpot // exportin, tRNA (nuclear export receptor for tRNAs) // 10|10 D3 // 73192	NM_001081056 // RefSeq // Mus musculus exportin, tRNA (nuclear export receptor for tRNAs) (Xpot), mRNA. // chr10 // 100 // 100 // 21 // 21 // 0 /// ENSMUST00000039810 // ENSEMBL // Exportin-T gene:ENSMUSG00000034667 // chr10 // 100 // 100 // 21 // 21 // 0	Xpot	0.000891031	1.58219	8.63789	0.0782986	398.798	22.2249	9.29134	0.199758	630.974	83.9598	8.59802	8.59846	8.59976	8.75534	9.26969	9.01922	9.47021	9.40622	387.49	387.61	387.958	432.134	617.243	518.867	709.282	678.505
NM_173750 // 2700007P21Rik // RIKEN cDNA 2700007P21 gene // 2 E3|2 // 212772 /// NM_001025102 // 2700007P21Rik // RIKEN cDNA 2700007P21 gene // 2 E3|2 // 212772 /// ENSMUST00000028536 // 2700007P21Rik // RIKEN cDNA 2700007P21 gene // 2 E3|2 // 212772 /// ENSMUST00000093883 // 2700007P21Rik // RIKEN cDNA 2700007P21 gene // 2 E3|2 // 212772 /// BC054106 // 2700007P21Rik // RIKEN cDNA 2700007P21 gen…	NM_173750 // RefSeq // Mus musculus RIKEN cDNA 2700007P21 gene (2700007P21Rik), transcript variant 2, mRNA. // chr2 // 100 // 96 // 26 // 26 // 0 /// NM_001025102 // RefSeq // Mus musculus RIKEN cDNA 2700007P21 gene (2700007P21Rik), transcript variant 1, mRNA. // chr2 // 100 // 93 // 25 // 25 // 0 /// ENSMUST00000028536 // ENSEMBL // Isoform 1 of Uncharacterized protein C11orf46 homolog gene:ENSM…	2700007P21Rik	0.00208363	1.57995	6.53661	0.111164	93.0378	6.90406	7.18641	0.225703	146.995	22.8873	6.59599	6.57187	6.37134	6.60725	7.01169	6.9731	7.40795	7.3529	96.7363	95.1327	82.7876	97.4947	129.041	125.636	169.83	163.472
NM_001039089 // Sel1l // sel-1 suppressor of lin-12-like (C. elegans) // 12|12 E // 20338 /// NM_011344 // Sel1l // sel-1 suppressor of lin-12-like (C. elegans) // 12|12 E // 20338 /// ENSMUST00000021347 // Sel1l // sel-1 suppressor of lin-12-like (C. elegans) // 12|12 E // 20338 /// AF063095 // Sel1l // sel-1 suppressor of lin-12-like (C. elegans) // 12|12 E // 20338	NM_001039089 // RefSeq // Mus musculus sel-1 suppressor of lin-12-like (C. elegans) (Sel1l), transcript variant 1, mRNA. // chr12 // 100 // 100 // 46 // 46 // 0 /// NM_011344 // RefSeq // Mus musculus sel-1 suppressor of lin-12-like (C. elegans) (Sel1l), transcript variant 2, mRNA. // chr12 // 100 // 96 // 44 // 44 // 0 /// ENSMUST00000021347 // ENSEMBL // Isoform 1 of Protein sel-1 homolog 1 gen…	Sel1l	0.00455472	1.56896	9.82304	0.0942044	907.223	58.1599	10.4566	0.271929	1423.4	254.587	9.69354	9.91243	9.82008	9.86609	10.4061	10.0921	10.6492	10.6788	828.03	963.693	903.937	933.233	1356.92	1091.53	1605.97	1639.17
NM_178890 // Abtb2 // ankyrin repeat and BTB (POZ) domain containing 2 // 2 E2|2 // 99382 /// ENSMUST00000076212 // Abtb2 // ankyrin repeat and BTB (POZ) domain containing 2 // 2 E2|2 // 99382 /// BC054399 // Abtb2 // ankyrin repeat and BTB (POZ) domain containing 2 // 2 E2|2 // 99382	NM_178890 // RefSeq // Mus musculus ankyrin repeat and BTB (POZ) domain containing 2 (Abtb2), mRNA. // chr2 // 100 // 100 // 34 // 34 // 0 /// ENSMUST00000076212 // ENSEMBL // Ankyrin repeat and BTB/POZ domain-containing protein 2 gene:ENSMUSG00000032724 // chr2 // 100 // 100 // 34 // 34 // 0 /// BC054399 // GenBank // Mus musculus ankyrin repeat and BTB (POZ) domain containing 2, mRNA (cDNA clon…	Abtb2	0.000252477	1.56397	4.89033	0.0965016	29.7065	1.93326	5.53308	0.136393	46.4603	4.40414	4.90446	4.75068	4.9397	4.96648	5.37783	5.47943	5.57835	5.69672	29.9495	26.9214	30.6902	31.2651	41.5804	44.6141	47.7804	51.8663
NM_029210 // Sv2c // synaptic vesicle glycoprotein 2c // 13 D1|13 // 75209 /// ENSMUST00000161263 // Sv2c // synaptic vesicle glycoprotein 2c // 13 D1|13 // 75209 /// ENSMUST00000055677 // Sv2c // synaptic vesicle glycoprotein 2c // 13 D1|13 // 75209 /// BC132111 // Sv2c // synaptic vesicle glycoprotein 2c // 13 D1|13 // 75209	NM_029210 // RefSeq // Mus musculus synaptic vesicle glycoprotein 2c (Sv2c), mRNA. // chr13 // 100 // 100 // 36 // 36 // 0 /// ENSMUST00000161263 // ENSEMBL // Synaptic vesicle glycoprotein 2C gene:ENSMUSG00000051111 // chr13 // 100 // 100 // 36 // 36 // 0 /// ENSMUST00000055677 // ENSEMBL // Synaptic vesicle glycoprotein 2C gene:ENSMUSG00000051111 // chr13 // 100 // 97 // 35 // 35 // 0 /// BC132…	Sv2c	0.000196	1.54508	4.85225	0.144693	28.9954	2.95833	5.48447	0.0609178	44.8002	1.90427	4.72307	4.89414	4.75349	5.03829	5.43526	5.4356	5.56102	5.50599	26.4111	29.7359	26.9738	32.8608	43.2689	43.279	47.2099	45.4431
NM_008137 // Gna14 // guanine nucleotide binding protein, alpha 14 // 19 A-B|19 9.0 cM // 14675 /// ENSMUST00000025602 // Gna14 // guanine nucleotide binding protein, alpha 14 // 19 A-B|19 9.0 cM // 14675 /// BC027015 // Gna14 // guanine nucleotide binding protein, alpha 14 // 19 A-B|19 9.0 cM // 14675	NM_008137 // RefSeq // Mus musculus guanine nucleotide binding protein, alpha 14 (Gna14), mRNA. // chr19 // 100 // 100 // 30 // 30 // 0 /// ENSMUST00000025602 // ENSEMBL // guanine nucleotide-binding protein subunit alpha-14 gene:ENSMUSG00000024697 // chr19 // 100 // 100 // 30 // 30 // 0 /// BC027015 // GenBank // Mus musculus guanine nucleotide binding protein, alpha 14, mRNA (cDNA clone MGC:361…	Gna14	0.00309268	1.53872	4.90608	0.221928	30.246	4.53948	5.53503	0.14239	46.5401	4.72903	4.86562	4.99675	4.6196	5.14236	5.50295	5.39723	5.50513	5.73481	29.154	31.9281	24.5832	35.3186	45.3476	42.1433	45.4159	53.2537
NM_010097 // Sparcl1 // SPARC-like 1 // 5 E4|5 55.0 cM // 13602 /// ENSMUST00000031249 // Sparcl1 // SPARC-like 1 // 5 E4|5 55.0 cM // 13602 /// U77330 // Sparcl1 // SPARC-like 1 // 5 E4|5 55.0 cM // 13602	NM_010097 // RefSeq // Mus musculus SPARC-like 1 (Sparcl1), mRNA. // chr5 // 100 // 97 // 32 // 32 // 0 /// ENSMUST00000031249 // ENSEMBL // SPARC-like protein 1 gene:ENSMUSG00000029309 // chr5 // 100 // 97 // 32 // 32 // 0 /// U77330 // GenBank // Mus musculus extracellular matrix protein precursor SC1 mRNA, complete cds. // chr5 // 100 // 97 // 32 // 32 // 0	Sparcl1	0.00166494	1.534	7.60608	0.194445	196.114	24.9971	8.22879	0.124082	300.839	26.4111	7.71112	7.62972	7.32546	7.75802	8.20172	8.21335	8.3989	8.10119	209.546	198.049	160.392	216.469	294.418	296.801	337.536	274.601
NM_029735 // Eprs // glutamyl-prolyl-tRNA synthetase // 1|1 H4-H6 // 107508 /// ENSMUST00000046514 // Eprs // glutamyl-prolyl-tRNA synthetase // 1|1 H4-H6 // 107508 /// BC141049 // Eprs // glutamyl-prolyl-tRNA synthetase // 1|1 H4-H6 // 107508	NM_029735 // RefSeq // Mus musculus glutamyl-prolyl-tRNA synthetase (Eprs), mRNA. // chr1 // 100 // 97 // 32 // 32 // 0 /// ENSMUST00000046514 // ENSEMBL // Bifunctional aminoacyl-tRNA synthetase gene:ENSMUSG00000026615 // chr1 // 100 // 97 // 32 // 32 // 0 /// BC141049 // GenBank // Mus musculus glutamyl-prolyl-tRNA synthetase, mRNA (cDNA clone MGC:176010 IMAGE:9055661), complete cds. // chr1 //…	Eprs	0.000302983	1.53243	9.39255	0.0829238	672.957	39.6221	10.0049	0.142114	1031.26	103.105	9.37077	9.3577	9.32777	9.51398	9.94857	9.85428	10.19	10.0267	662.037	656.067	642.598	731.125	988.142	925.622	1168.13	1043.13
NM_011340 // Serpinf1 // serine (or cysteine) peptidase inhibitor, clade F, member 1 // 11 B5|11 // 20317 /// ENSMUST00000000769 // Serpinf1 // serine (or cysteine) peptidase inhibitor, clade F, member 1 // 11 B5|11 // 20317 /// AF036164 // Serpinf1 // serine (or cysteine) peptidase inhibitor, clade F, member 1 // 11 B5|11 // 20317 /// ENSMUST00000094022 // Serpinf1 // serine (or cysteine) peptid…	NM_011340 // RefSeq // Mus musculus serine (or cysteine) peptidase inhibitor, clade F, member 1 (Serpinf1), mRNA. // chr11 // 100 // 91 // 29 // 29 // 0 /// ENSMUST00000000769 // ENSEMBL // Pigment epithelium-derived factor gene:ENSMUSG00000000753 // chr11 // 100 // 91 // 29 // 29 // 0 /// AF036164 // GenBank // Mus musculus pigment epithelium-derived factor (PEDF) mRNA, complete cds. // chr11 //…	Serpinf1	0.0064277	1.52863	5.44209	0.121801	43.5887	3.58523	6.03974	0.265638	66.6307	12.3144	5.27463	5.52719	5.42928	5.53726	5.7402	5.92842	6.13297	6.35736	38.7099	46.1159	43.0901	46.4388	53.4529	60.902	70.1793	81.9888
NM_008981 // Ptprg // protein tyrosine phosphatase, receptor type, G // 14 A2|14 2.0 cM // 19270 /// ENSMUST00000022264 // Ptprg // protein tyrosine phosphatase, receptor type, G // 14 A2|14 2.0 cM // 19270 /// L09562 // Ptprg // protein tyrosine phosphatase, receptor type, G // 14 A2|14 2.0 cM // 19270 /// ENSMUST00000142917 // Ptprg // protein tyrosine phosphatase, receptor type, G // 14 A2|14 …	NM_008981 // RefSeq // Mus musculus protein tyrosine phosphatase, receptor type, G (Ptprg), mRNA. // chr14 // 100 // 100 // 31 // 31 // 0 /// ENSMUST00000022264 // ENSEMBL // Receptor-type tyrosine-protein phosphatase gamma gene:ENSMUSG00000021745 // chr14 // 100 // 100 // 31 // 31 // 0 /// L09562 // GenBank // Mouse receptor-type protein tyrosine phosphatase gamma homolog mRNA, complete cds. // …	Ptprg	0.00883537	1.51881	6.24909	0.16811	76.4424	8.67058	6.84147	0.261338	116.102	21.1169	6.22246	6.41168	6.02555	6.33666	6.82432	6.52676	7.16629	6.8485	74.6702	85.1349	65.1435	80.8209	113.325	92.2041	143.637	115.24
NM_030693 // Atf5 // activating transcription factor 5 // 7 B4|7 // 107503 /// NR_033136 // Atf5 // activating transcription factor 5 // 7 B4|7 // 107503 /// ENSMUST00000107893 // Atf5 // activating transcription factor 5 // 7 B4|7 // 107503 /// ENSMUST00000047356 // Atf5 // activating transcription factor 5 // 7 B4|7 // 107503 /// AF375476 // Atf5 // activating transcription factor 5 // 7 B4|7 /…	NM_030693 // RefSeq // Mus musculus activating transcription factor 5 (Atf5), transcript variant 1, mRNA. // chr7 // 100 // 93 // 28 // 28 // 0 /// NR_033136 // RefSeq // Mus musculus activating transcription factor 5 (Atf5), transcript variant 2, non-coding RNA. // chr7 // 100 // 87 // 26 // 26 // 0 /// ENSMUST00000107893 // ENSEMBL // Cyclic AMP-dependent transcription factor ATF-5 gene:ENSMUSG…	Atf5	0.00469988	1.5164	8.62407	0.245499	398.66	63.1554	9.23504	0.133355	604.529	55.9169	8.2692	8.65947	8.74787	8.81976	9.08421	9.28978	9.17588	9.3903	308.515	404.352	429.904	451.868	542.774	625.898	578.384	671.059
NM_145575 // Cald1 // caldesmon 1 // 6 B1|6 11.5 cM // 109624 /// BC019435 // Cald1 // caldesmon 1 // 6 B1|6 11.5 cM // 109624 /// ENSMUST00000045191 // Cald1 // caldesmon 1 // 6 B1|6 11.5 cM // 109624	NM_145575 // RefSeq // Mus musculus caldesmon 1 (Cald1), mRNA. // chr6 // 100 // 70 // 26 // 26 // 0 /// BC019435 // GenBank // Mus musculus caldesmon 1, mRNA (cDNA clone MGC:30319 IMAGE:5148205), complete cds. // chr6 // 100 // 70 // 26 // 26 // 0 /// ENSMUST00000045191 // ENSEMBL // 89 kDa protein gene:ENSMUSG00000029761 // chr6 // 100 // 81 // 30 // 30 // 0 /// ENSMUST00000149009 // ENSEMBL //…	Cald1	0.000410985	1.50803	6.25798	0.0992474	76.666	5.19898	6.84831	0.135227	115.614	11.2161	6.35646	6.30712	6.12698	6.24135	6.81167	6.73045	6.80792	7.04323	81.938	79.1831	69.8884	75.6545	112.335	106.186	112.044	131.893
NM_009201 // Slc1a5 // solute carrier family 1 (neutral amino acid transporter), member 5 // 7 A2|7 // 20514 /// ENSMUST00000108496 // Slc1a5 // solute carrier family 1 (neutral amino acid transporter), member 5 // 7 A2|7 // 20514 /// L42115 // Slc1a5 // solute carrier family 1 (neutral amino acid transporter), member 5 // 7 A2|7 // 20514 /// ENSMUST00000065232 // Slc1a5 // solute carrier family …	NM_009201 // RefSeq // Mus musculus solute carrier family 1 (neutral amino acid transporter), member 5 (Slc1a5), mRNA. // chr7 // 100 // 100 // 34 // 34 // 0 /// ENSMUST00000108496 // ENSEMBL // Solute carrier family 1 (Neutral amino acid transporter), member 5 gene:ENSMUSG00000001918 // chr7 // 100 // 100 // 34 // 34 // 0 /// L42115 // GenBank // Mus musculus insulin-activated amino acid transpo…	Slc1a5	0.000652912	1.50641	5.89407	0.178532	59.7999	7.0211	6.49255	0.0496789	90.0832	3.07875	5.63447	6.04063	5.93716	5.96402	6.54504	6.42525	6.50212	6.49777	49.6758	65.8282	61.2721	62.4235	93.3801	85.9395	90.643	90.3701
NM_010599 // Kcnab3 // potassium voltage-gated channel, shaker-related subfamily, beta member 3 // 11|11 B4 // 16499 /// ENSMUST00000018614 // Kcnab3 // potassium voltage-gated channel, shaker-related subfamily, beta member 3 // 11|11 B4 // 16499 /// BC017518 // Kcnab3 // potassium voltage-gated channel, shaker-related subfamily, beta member 3 // 11|11 B4 // 16499	NM_010599 // RefSeq // Mus musculus potassium voltage-gated channel, shaker-related subfamily, beta member 3 (Kcnab3), mRNA. // chr11 // 100 // 94 // 32 // 32 // 0 /// ENSMUST00000018614 // ENSEMBL // voltage-gated potassium channel subunit beta-3 gene:ENSMUSG00000018470 // chr11 // 100 // 94 // 32 // 32 // 0 /// BC017518 // GenBank // Mus musculus potassium voltage-gated channel, shaker-related …	Kcnab3	0.00685934	1.50182	6.83101	0.22081	114.868	17.904	7.42108	0.192049	172.511	22.5579	6.70151	6.61279	6.90135	7.10838	7.4752	7.40144	7.17282	7.63486	104.078	97.8699	119.54	137.986	177.935	169.065	144.289	198.756
NM_178675 // Slc35f1 // solute carrier family 35, member F1 // 10 B3|10 // 215085 /// ENSMUST00000105473 // Slc35f1 // solute carrier family 35, member F1 // 10 B3|10 // 215085 /// BC059075 // Slc35f1 // solute carrier family 35, member F1 // 10 B3|10 // 215085 /// ENSMUST00000047026 // Slc35f1 // solute carrier family 35, member F1 // 10 B3|10 // 215085 /// ENSMUST00000105472 // Slc35f1 // solut…	NM_178675 // RefSeq // Mus musculus solute carrier family 35, member F1 (Slc35f1), mRNA. // chr10 // 100 // 100 // 29 // 29 // 0 /// ENSMUST00000105473 // ENSEMBL // Solute carrier family 35 member F1 gene:ENSMUSG00000038602 // chr10 // 100 // 100 // 29 // 29 // 0 /// BC059075 // GenBank // Mus musculus solute carrier family 35, member F1, mRNA (cDNA clone MGC:69930 IMAGE:6826829), complete cds. …	Slc35f1	0.00932017	1.50159	5.87391	0.0693064	58.6944	2.79396	6.44018	0.292542	88.1352	16.952	5.86504	5.94572	5.78247	5.90242	6.56877	6.04375	6.72769	6.42052	58.2843	61.6367	55.0422	59.8144	94.9286	65.9705	105.983	85.6582
NM_001039385 // Vgf // VGF nerve growth factor inducible // 5 G2|5 79.0 cM // 381677 /// ENSMUST00000041543 // Vgf // VGF nerve growth factor inducible // 5 G2|5 79.0 cM // 381677 /// BC085134 // Vgf // VGF nerve growth factor inducible // 5 G2|5 79.0 cM // 381677	NM_001039385 // RefSeq // Mus musculus VGF nerve growth factor inducible (Vgf), mRNA. // chr5 // 100 // 74 // 25 // 25 // 0 /// ENSMUST00000041543 // ENSEMBL // VGF nerve growth factor inducible gene:ENSMUSG00000037428 // chr5 // 100 // 74 // 25 // 25 // 0 /// BC085134 // GenBank // Mus musculus VGF nerve growth factor inducible, mRNA (cDNA clone MGC:115754 IMAGE:6734388), complete cds. // chr5 /…	Vgf	0.00152837	1.49915	6.31759	0.0687409	79.8274	3.78979	6.89301	0.198013	119.673	15.8514	6.24001	6.27961	6.37969	6.37105	7.09368	6.95462	6.62193	6.90179	75.5838	77.6873	83.2678	82.7708	136.587	124.037	98.4915	119.577
NM_013757 // Sytl4 // synaptotagmin-like 4 // X E3|X // 27359 /// ENSMUST00000033608 // Sytl4 // synaptotagmin-like 4 // X E3|X // 27359 /// AB025258 // Sytl4 // synaptotagmin-like 4 // X E3|X // 27359	NM_013757 // RefSeq // Mus musculus synaptotagmin-like 4 (Sytl4), mRNA. // chrX // 100 // 95 // 38 // 38 // 0 /// ENSMUST00000033608 // ENSEMBL // Isoform 1 of Synaptotagmin-like protein 4 gene:ENSMUSG00000031255 // chrX // 100 // 95 // 38 // 38 // 0 /// AB025258 // GenBank // Mus musculus mRNA for granuphilin-a, complete cds. // chrX // 100 // 95 // 38 // 38 // 0	Sytl4	0.00309149	0.659867	10.0404	0.217295	1062.35	167.557	9.44967	0.118759	701.009	56.5883	10.3464	9.84264	10.025	9.94741	9.51839	9.56007	9.42851	9.29171	1301.93	918.185	1041.93	987.347	733.369	754.862	689.073	626.733
NM_008077 // Gad1 // glutamic acid decarboxylase 1 // 2 D|2 43.0 cM // 14415 /// ENSMUST00000094934 // Gad1 // glutamic acid decarboxylase 1 // 2 D|2 43.0 cM // 14415 /// BC027059 // Gad1 // glutamic acid decarboxylase 1 // 2 D|2 43.0 cM // 14415 /// ENSMUST00000130604 // Gad1 // glutamic acid decarboxylase 1 // 2 D|2 43.0 cM // 14415 /// ENSMUST00000123330 // Gad1 // glutamic acid decarboxylase …	NM_008077 // RefSeq // Mus musculus glutamic acid decarboxylase 1 (Gad1), mRNA. // chr2 // 100 // 93 // 28 // 28 // 0 /// ENSMUST00000094934 // ENSEMBL // Glutamate decarboxylase 1 gene:ENSMUSG00000070880 // chr2 // 100 // 93 // 28 // 28 // 0 /// BC027059 // GenBank // Mus musculus glutamic acid decarboxylase 1, mRNA (cDNA clone MGC:38759 IMAGE:5358787), complete cds. // chr2 // 100 // 93 // 28 /…	Gad1	0.00402432	0.658036	9.66064	0.196006	815.135	115.191	9.05866	0.180504	536.388	67.1274	9.93461	9.58018	9.47729	9.65049	9.17489	9.24971	8.92117	8.88886	978.626	765.457	712.77	803.685	577.987	608.751	484.773	474.04
NM_026887 // Ap1s2 // adaptor-related protein complex 1, sigma 2 subunit // X F5|X // 108012 /// ENSMUST00000112294 // Ap1s2 // adaptor-related protein complex 1, sigma 2 subunit // X F5|X // 108012 /// BC046964 // Ap1s2 // adaptor-related protein complex 1, sigma 2 subunit // X F5|X // 108012 /// ENSMUST00000069041 // Ap1s2 // adaptor-related protein complex 1, sigma 2 subunit // X F5|X // 10801…	NM_026887 // RefSeq // Mus musculus adaptor-related protein complex 1, sigma 2 subunit (Ap1s2), mRNA. // chrX // 100 // 96 // 26 // 26 // 0 /// ENSMUST00000112294 // ENSEMBL // Putative uncharacterized protein gene:ENSMUSG00000031367 // chrX // 100 // 96 // 26 // 26 // 0 /// BC046964 // GenBank // Mus musculus adaptor-related protein complex 1, sigma 2 subunit, mRNA (cDNA clone MGC:54976 IMAGE:64…	Ap1s2	0.00459922	0.654393	9.7302	0.201084	855.51	117.984	9.1196	0.191876	559.84	71.0465	9.90362	9.60567	9.89879	9.51271	9.28575	8.84912	9.21782	9.1257	957.825	779.104	954.625	730.487	624.15	461.158	595.442	558.61
NM_177819 // Fam135b // family with sequence similarity 135, member B // 15 D3|15 // 70363 /// ENSMUST00000022953 // Fam135b // family with sequence similarity 135, member B // 15 D3|15 // 70363	NM_177819 // RefSeq // Mus musculus family with sequence similarity 135, member B (Fam135b), mRNA. // chr15 // 100 // 100 // 25 // 25 // 0 /// ENSMUST00000022953 // ENSEMBL // Protein FAM135B gene:ENSMUSG00000036800 // chr15 // 100 // 100 // 25 // 25 // 0	Fam135b	0.00483455	0.652254	5.92367	0.242035	61.3431	10.2104	5.31748	0.13849	40.0113	3.69785	6.11063	6.15257	5.7467	5.68477	5.33068	5.11869	5.39254	5.42799	69.1008	71.1392	53.6943	51.4383	40.2434	34.744	42.0065	43.0515
NM_028784 // F13a1 // coagulation factor XIII, A1 subunit // 13 A3.3|13 // 74145 /// NM_001166391 // F13a1 // coagulation factor XIII, A1 subunit // 13 A3.3|13 // 74145 /// ENSMUST00000037491 // F13a1 // coagulation factor XIII, A1 subunit // 13 A3.3|13 // 74145 /// BC040274 // F13a1 // coagulation factor XIII, A1 subunit // 13 A3.3|13 // 74145 /// ENSMUST00000095869 // F13a1 // coagulation facto…	NM_028784 // RefSeq // Mus musculus coagulation factor XIII, A1 subunit (F13a1), transcript variant 1, mRNA. // chr13 // 100 // 100 // 29 // 29 // 0 /// NM_001166391 // RefSeq // Mus musculus coagulation factor XIII, A1 subunit (F13a1), transcript variant 2, mRNA. // chr13 // 100 // 97 // 28 // 28 // 0 /// ENSMUST00000037491 // ENSEMBL // Coagulation factor XIII A chain gene:ENSMUSG00000039109 //…	F13a1	0.00964103	0.650699	5.24378	0.271074	38.3717	6.70103	4.6332	0.182268	24.9684	3.26085	5.47913	4.85557	5.28373	5.35669	4.53684	4.64565	4.46696	4.88338	44.6048	28.9515	38.9549	40.9755	23.2126	25.031	22.1151	29.515
NM_024469 // Bhlhe41 // basic helix-loop-helix family, member e41 // 6 G2-G3|6 74.5 cM // 79362 /// ENSMUST00000032386 // Bhlhe41 // basic helix-loop-helix family, member e41 // 6 G2-G3|6 74.5 cM // 79362 /// AB044090 // Bhlhe41 // basic helix-loop-helix family, member e41 // 6 G2-G3|6 74.5 cM // 79362	NM_024469 // RefSeq // Mus musculus basic helix-loop-helix family, member e41 (Bhlhe41), mRNA. // chr6 // 100 // 100 // 26 // 26 // 0 /// ENSMUST00000032386 // ENSEMBL // Class E basic helix-loop-helix protein 41 gene:ENSMUSG00000030256 // chr6 // 100 // 100 // 26 // 26 // 0 /// AB044090 // GenBank // Mus musculus mRNA for bHLH protein DEC2, complete cds. // chr6 // 100 // 100 // 26 // 26 // 0	Bhlhe41	0.00216511	0.649627	8.26246	0.0987774	307.621	21.2001	7.62982	0.226201	199.839	29.8317	8.26002	8.38955	8.14844	8.25185	7.83384	7.31694	7.74773	7.62078	306.558	335.355	283.742	304.827	228.15	159.448	214.931	196.826
NM_178879 // B3gnt9-ps // UDP-GlcNAc:betaGal beta-1,3-N-acetylglucosaminyltransferase 9, pseudogene // 8 D3|8 // 97440 /// ENSMUST00000161745 // B3gnt9-ps // UDP-GlcNAc:betaGal beta-1,3-N-acetylglucosaminyltransferase 9, pseudogene // 8 D3|8 // 97440 /// BC108347 // B3gnt9-ps // UDP-GlcNAc:betaGal beta-1,3-N-acetylglucosaminyltransferase 9, pseudogene // 8 D3|8 // 97440	NM_178879 // RefSeq // Mus musculus UDP-GlcNAc:betaGal beta-1,3-N-acetylglucosaminyltransferase 9, pseudogene (B3gnt9-ps), mRNA. // chr8 // 100 // 86 // 25 // 25 // 0 /// ENSMUST00000161745 // ENSEMBL // UDP-GlcNAc:betaGal beta-1,3-N-acetylglucosaminyltransferase 9 gene:ENSMUSG00000089858 // chr8 // 100 // 62 // 18 // 18 // 0 /// BC108347 // GenBank // Mus musculus UDP-GlcNAc:betaGal beta-1,3-N-a…	B3gnt9-ps	0.000979655	0.646485	7.19015	0.0991539	146.295	10.2669	6.55449	0.187968	94.5777	11.8409	7.18247	7.09721	7.15176	7.32916	6.55109	6.29431	6.72844	6.6441	145.257	136.922	142.198	160.804	93.7723	78.483	106.038	100.017
NM_177387 // Ust // uronyl-2-sulfotransferase // 10 A1|10 // 338362 /// ENSMUST00000061601 // Ust // uronyl-2-sulfotransferase // 10 A1|10 // 338362 /// BC138155 // Ust // uronyl-2-sulfotransferase // 10 A1|10 // 338362	NM_177387 // RefSeq // Mus musculus uronyl-2-sulfotransferase (Ust), mRNA. // chr10 // 100 // 100 // 27 // 27 // 0 /// ENSMUST00000061601 // ENSEMBL // uronyl 2-sulfotransferase gene:ENSMUSG00000047712 // chr10 // 100 // 100 // 27 // 27 // 0 /// BC138155 // GenBank // Mus musculus uronyl-2-sulfotransferase, mRNA (cDNA clone MGC:169779 IMAGE:8861174), complete cds. // chr10 // 100 // 89 // 24 // 2…	Ust	0.000792219	0.645992	6.90742	0.0859256	120.203	7.08459	6.27012	0.185736	77.6502	9.72155	6.8992	6.99908	6.79429	6.93712	6.46658	6.31536	6.27897	6.01957	119.362	127.918	110.99	122.541	88.437	79.6366	77.653	64.8742
NM_001037938 // Dhrs4 // dehydrogenase/reductase (SDR family) member 4 // 14 C3|14 28.0 cM // 28200 /// NM_030686 // Dhrs4 // dehydrogenase/reductase (SDR family) member 4 // 14 C3|14 28.0 cM // 28200 /// ENSMUST00000022821 // Dhrs4 // dehydrogenase/reductase (SDR family) member 4 // 14 C3|14 28.0 cM // 28200 /// BC054361 // Dhrs4 // dehydrogenase/reductase (SDR family) member 4 // 14 C3|14 28.0 …	NM_001037938 // RefSeq // Mus musculus dehydrogenase/reductase (SDR family) member 4 (Dhrs4), transcript variant 1, mRNA. // chr14 // 100 // 88 // 35 // 35 // 0 /// NM_030686 // RefSeq // Mus musculus dehydrogenase/reductase (SDR family) member 4 (Dhrs4), transcript variant 2, mRNA. // chr14 // 100 // 80 // 32 // 32 // 0 /// ENSMUST00000022821 // ENSEMBL // Dehydrogenase/reductase SDR family memb…	Dhrs4	0.00730368	0.643171	8.28423	0.285121	316.452	64.6923	7.66517	0.124903	203.533	16.9274	8.65886	8.0034	8.13665	8.33803	7.70306	7.71931	7.75736	7.48095	404.181	256.605	281.433	323.591	208.378	210.739	216.37	178.645
NM_178739 // Dcaf12l1 // DDB1 and CUL4 associated factor 12-like 1 // X A4|X // 245404 /// NM_001190718 // Dcaf12l1 // DDB1 and CUL4 associated factor 12-like 1 // X A4|X // 245404 /// ENSMUST00000060481 // Dcaf12l1 // DDB1 and CUL4 associated factor 12-like 1 // X A4|X // 245404 /// ENSMUST00000115056 // Dcaf12l1 // DDB1 and CUL4 associated factor 12-like 1 // X A4|X // 245404 /// BC068319 // Dc…	NM_178739 // RefSeq // Mus musculus DDB1 and CUL4 associated factor 12-like 1 (Dcaf12l1), transcript variant A, mRNA. // chrX // 100 // 100 // 26 // 26 // 0 /// NM_001190718 // RefSeq // Mus musculus DDB1 and CUL4 associated factor 12-like 1 (Dcaf12l1), transcript variant B, mRNA. // chrX // 100 // 100 // 26 // 26 // 0 /// ENSMUST00000060481 // ENSEMBL // DDB1- and CUL4-associated factor 12-like …	Dcaf12l1	1.27477e-05	0.642954	8.29943	0.0934008	315.552	20.9289	7.66431	0.0286452	202.886	4.04938	8.25661	8.43386	8.22146	8.28578	7.6642	7.70364	7.6532	7.63619	305.834	345.817	298.474	312.083	202.84	208.463	201.3	198.939
NM_207228 // Tsga10 // testis specific 10 // 1 B|1 // 211484 /// ENSMUST00000041815 // Tsga10 // testis specific 10 // 1 B|1 // 211484 /// BC066782 // Tsga10 // testis specific 10 // 1 B|1 // 211484 /// ENSMUST00000114903 // Tsga10 // testis specific 10 // 1 B|1 // 211484 /// ENSMUST00000151735 // Tsga10 // testis specific 10 // 1 B|1 // 211484 /// ENSMUST00000114901 // Tsga10 // testis specific …	NM_207228 // RefSeq // Mus musculus testis specific 10 (Tsga10), mRNA. // chr1 // 100 // 91 // 39 // 39 // 0 /// ENSMUST00000041815 // ENSEMBL // Isoform 1 of Testis-specific gene 10 protein gene:ENSMUSG00000060771 // chr1 // 100 // 91 // 39 // 39 // 0 /// BC066782 // GenBank // Mus musculus testis specific 10, mRNA (cDNA clone MGC:74389 IMAGE:6705127), complete cds. // chr1 // 100 // 91 // 39 //…	Tsga10	5.26428e-05	0.635031	5.91825	0.0551625	60.5076	2.30748	5.26038	0.117044	38.4242	3.12466	5.98309	5.84842	5.92497	5.91654	5.18728	5.3929	5.32128	5.14004	63.2543	57.6169	60.7567	60.4025	36.4358	42.0171	39.9821	35.2618
NM_011769 // Zim1 // zinc finger, imprinted 1 // 7 A1|7 6.5 cM // 22776 /// ENSMUST00000002336 // Zim1 // zinc finger, imprinted 1 // 7 A1|7 6.5 cM // 22776 /// ENSMUST00000122432 // Zim1 // zinc finger, imprinted 1 // 7 A1|7 6.5 cM // 22776 /// BC066196 // Zim1 // zinc finger, imprinted 1 // 7 A1|7 6.5 cM // 22776	NM_011769 // RefSeq // Mus musculus zinc finger, imprinted 1 (Zim1), mRNA. // chr7 // 100 // 100 // 26 // 26 // 0 /// ENSMUST00000002336 // ENSEMBL // zinc finger, imprinted 1 gene:ENSMUSG00000002266 // chr7 // 100 // 100 // 26 // 26 // 0 /// ENSMUST00000122432 // ENSEMBL // zinc finger, imprinted 1 gene:ENSMUSG00000002266 // chr7 // 100 // 96 // 25 // 25 // 0 /// BC066196 // GenBank // Mus muscu…	Zim1	0.00870322	0.630946	8.49961	0.243339	365.788	60.7819	7.83472	0.248213	230.792	38.6291	8.72514	8.22977	8.68453	8.359	8.05197	7.73215	8.02288	7.53189	423.185	300.199	411.437	328.331	265.39	212.622	260.092	185.065
NM_145942 // Hmgcs1 // 3-hydroxy-3-methylglutaryl-Coenzyme A synthase 1 // 13 66.0 cM|13 // 208715 /// BC029693 // Hmgcs1 // 3-hydroxy-3-methylglutaryl-Coenzyme A synthase 1 // 13 66.0 cM|13 // 208715	NM_145942 // RefSeq // Mus musculus 3-hydroxy-3-methylglutaryl-Coenzyme A synthase 1 (Hmgcs1), mRNA. // chr13_random // 100 // 86 // 24 // 24 // 0 /// BC029693 // GenBank // Mus musculus 3-hydroxy-3-methylglutaryl-Coenzyme A synthase 1, mRNA (cDNA clone MGC:36525 IMAGE:5375374), complete cds. // chr13_random // 100 // 79 // 22 // 22 // 0 /// ENSMUST00000100285 // ENSEMBL // cdna:known supercontig…	Hmgcs1	0.00070302	0.629625	8.46904	0.13996	355.613	34.8505	7.80046	0.156444	223.903	23.7524	8.38416	8.52043	8.64128	8.33028	7.88434	7.59615	7.95394	7.76741	334.107	367.201	399.287	321.857	236.277	193.495	247.956	217.883
NM_007572 // C1qa // complement component 1, q subcomponent, alpha polypeptide // 4 D3|4 66.1 cM // 12259 /// ENSMUST00000046285 // C1qa // complement component 1, q subcomponent, alpha polypeptide // 4 D3|4 66.1 cM // 12259 /// BC002086 // C1qa // complement component 1, q subcomponent, alpha polypeptide // 4 D3|4 66.1 cM // 12259	NM_007572 // RefSeq // Mus musculus complement component 1, q subcomponent, alpha polypeptide (C1qa), mRNA. // chr4 // 100 // 100 // 26 // 26 // 0 /// ENSMUST00000046285 // ENSEMBL // complement C1q subcomponent subunit A precursor gene:ENSMUSG00000036887 // chr4 // 100 // 100 // 26 // 26 // 0 /// BC002086 // GenBank // Mus musculus complement component 1, q subcomponent, alpha polypeptide, mRNA …	C1qa	0.00135048	0.620927	8.62945	0.205409	399.063	57.2462	7.9486	0.128161	247.789	22.7283	8.87613	8.52259	8.41032	8.70876	8.13267	7.92497	7.89975	7.83703	469.874	367.753	340.218	418.405	280.658	243.027	238.815	228.655
NM_053247 // Lyve1 // lymphatic vessel endothelial hyaluronan receptor 1 // 7|7 F2 // 114332 /// ENSMUST00000033050 // Lyve1 // lymphatic vessel endothelial hyaluronan receptor 1 // 7|7 F2 // 114332 /// BC038653 // Lyve1 // lymphatic vessel endothelial hyaluronan receptor 1 // 7|7 F2 // 114332	NM_053247 // RefSeq // Mus musculus lymphatic vessel endothelial hyaluronan receptor 1 (Lyve1), mRNA. // chr7 // 100 // 97 // 28 // 28 // 0 /// ENSMUST00000033050 // ENSEMBL // Lymphatic vessel endothelial hyaluronic acid receptor 1 gene:ENSMUSG00000030787 // chr7 // 100 // 97 // 28 // 28 // 0 /// BC038653 // GenBank // Mus musculus lymphatic vessel endothelial hyaluronan receptor 1, mRNA (cDNA c…	Lyve1	0.00230893	0.62069	7.29316	0.238051	158.44	25.8417	6.61586	0.122384	98.3421	8.28762	7.15283	7.5271	7.03282	7.45991	6.75526	6.58921	6.65549	6.46348	142.304	184.452	130.945	176.059	108.028	96.2829	100.81	88.2473
NM_010141 // Epha7 // Eph receptor A7 // 4 A4|4 1.9 cM // 13841 /// NM_001122889 // Epha7 // Eph receptor A7 // 4 A4|4 1.9 cM // 13841 /// ENSMUST00000029964 // Epha7 // Eph receptor A7 // 4 A4|4 1.9 cM // 13841 /// ENSMUST00000080934 // Epha7 // Eph receptor A7 // 4 A4|4 1.9 cM // 13841 /// BC026153 // Epha7 // Eph receptor A7 // 4 A4|4 1.9 cM // 13841 /// ENSMUST00000108191 // Epha7 // Eph rece…	NM_010141 // RefSeq // Mus musculus Eph receptor A7 (Epha7), transcript variant 1, mRNA. // chr4 // 100 // 95 // 37 // 37 // 0 /// NM_001122889 // RefSeq // Mus musculus Eph receptor A7 (Epha7), transcript variant 2, mRNA. // chr4 // 100 // 54 // 21 // 21 // 0 /// ENSMUST00000029964 // ENSEMBL // ephrin type-A receptor 7 isoform 1 gene:ENSMUSG00000028289 // chr4 // 100 // 95 // 37 // 37 // 0 /// …	Epha7	0.00129977	0.619926	6.29706	0.109861	78.8064	6.13141	5.59777	0.221037	48.8541	7.43419	6.44872	6.19843	6.30274	6.23834	5.67291	5.33096	5.53336	5.85387	87.3492	73.437	78.9429	75.4966	51.0171	40.2511	46.3134	57.835
NM_199317 // Phf16 // PHD finger protein 16 // X A1.3|X // 382207 /// ENSMUST00000043693 // Phf16 // PHD finger protein 16 // X A1.3|X // 382207 /// ENSMUST00000115384 // Phf16 // PHD finger protein 16 // X A1.3|X // 382207 /// BC065070 // Phf16 // PHD finger protein 16 // X A1.3|X // 382207	NM_199317 // RefSeq // Mus musculus PHD finger protein 16 (Phf16), mRNA. // chrX // 100 // 80 // 28 // 28 // 0 /// ENSMUST00000043693 // ENSEMBL // Protein Jade-3 gene:ENSMUSG00000037315 // chrX // 100 // 100 // 35 // 35 // 0 /// ENSMUST00000115384 // ENSEMBL // PHD finger protein 16 gene:ENSMUSG00000037315 // chrX // 100 // 100 // 35 // 35 // 0 /// BC065070 // GenBank // Mus musculus PHD finger …	Phf16	0.000715638	0.610943	8.70389	0.0915297	417.622	26.1719	7.98391	0.207524	255.143	36.9973	8.78943	8.67933	8.76103	8.58579	8.22548	7.8338	8.08671	7.78963	442.468	409.956	433.843	384.22	299.306	228.144	271.858	221.265
NM_175291 // Dock10 // dedicator of cytokinesis 10 // 1 C4|1 // 210293 /// ENSMUST00000077946 // Dock10 // dedicator of cytokinesis 10 // 1 C4|1 // 210293 /// BC150753 // Dock10 // dedicator of cytokinesis 10 // 1 C4|1 // 210293 /// ENSMUST00000097681 // Dock10 // dedicator of cytokinesis 10 // 1 C4|1 // 210293 /// ENSMUST00000057520 // Dock10 // dedicator of cytokinesis 10 // 1 C4|1 // 210293	NM_175291 // RefSeq // Mus musculus dedicator of cytokinesis 10 (Dock10), mRNA. // chr1 // 100 // 93 // 57 // 57 // 0 /// ENSMUST00000077946 // ENSEMBL // dedicator of cytokinesis protein 10 gene:ENSMUSG00000038608 // chr1 // 100 // 93 // 57 // 57 // 0 /// BC150753 // GenBank // Mus musculus dedicator of cytokinesis 10, mRNA (cDNA clone MGC:183664 IMAGE:9087664), complete cds. // chr1 // 100 // 8…	Dock10	0.000690252	0.607786	6.62988	0.173345	99.5855	12.3612	5.91429	0.141717	60.5267	5.92519	6.86795	6.64559	6.52562	6.48037	5.99464	5.75617	6.06668	5.83966	116.804	100.12	92.1316	89.2864	63.7628	54.0481	67.0276	57.2683
NM_031197 // Slc2a2 // solute carrier family 2 (facilitated glucose transporter), member 2 // 3 A3|3 14.4 cM // 20526 /// ENSMUST00000029240 // Slc2a2 // solute carrier family 2 (facilitated glucose transporter), member 2 // 3 A3|3 14.4 cM // 20526 /// BC034675 // Slc2a2 // solute carrier family 2 (facilitated glucose transporter), member 2 // 3 A3|3 14.4 cM // 20526	NM_031197 // RefSeq // Mus musculus solute carrier family 2 (facilitated glucose transporter), member 2 (Slc2a2), mRNA. // chr3 // 100 // 100 // 30 // 30 // 0 /// ENSMUST00000029240 // ENSEMBL // Solute carrier family 2, facilitated glucose transporter member 2 gene:ENSMUSG00000027690 // chr3 // 100 // 100 // 30 // 30 // 0 /// BC034675 // GenBank // Mus musculus solute carrier family 2 (facilitat…	Slc2a2	0.00146703	0.602624	12.3935	0.230587	5431.38	848.324	11.6726	0.121206	3273.08	274.501	12.6192	12.1105	12.538	12.3063	11.8037	11.7415	11.5398	11.6054	6291.46	4421.96	5947.14	5064.94	3574.98	3424.01	2977.38	3115.94
NM_027671 // Sntg1 // syntrophin, gamma 1 // 1 A1-A2|1 // 71096 /// ENSMUST00000132064 // Sntg1 // syntrophin, gamma 1 // 1 A1-A2|1 // 71096 /// ENSMUST00000115488 // Sntg1 // syntrophin, gamma 1 // 1 A1-A2|1 // 71096 /// AF367759 // Sntg1 // syntrophin, gamma 1 // 1 A1-A2|1 // 71096 /// ENSMUST00000140302 // Sntg1 // syntrophin, gamma 1 // 1 A1-A2|1 // 71096 /// ENSMUST00000027042 // Sntg1 // sy…	NM_027671 // RefSeq // Mus musculus syntrophin, gamma 1 (Sntg1), mRNA. // chr1 // 100 // 100 // 41 // 41 // 0 /// ENSMUST00000132064 // ENSEMBL // gamma-1-syntrophin gene:ENSMUSG00000025909 // chr1 // 100 // 98 // 40 // 40 // 0 /// ENSMUST00000115488 // ENSEMBL // gamma-1-syntrophin gene:ENSMUSG00000025909 // chr1 // 100 // 88 // 36 // 36 // 0 /// AF367759 // GenBank // Mus musculus gamma-1 syntr…	Sntg1	0.00143904	0.593603	6.97104	0.155863	126.002	13.435	6.21214	0.224397	74.7951	11.1613	6.78092	6.91184	7.12847	7.06295	6.19725	5.90708	6.31472	6.42952	109.967	120.412	139.921	133.708	73.3766	60.0079	79.6015	86.1946
NM_177175 // Tmem215 // transmembrane protein 215 // 4 A5|4 // 320500 /// NM_001166009 // Tmem215 // transmembrane protein 215 // 4 A5|4 // 320500 /// ENSMUST00000049655 // Tmem215 // transmembrane protein 215 // 4 A5|4 // 320500 /// BC144984 // Tmem215 // transmembrane protein 215 // 4 A5|4 // 320500	NM_177175 // RefSeq // Mus musculus transmembrane protein 215 (Tmem215), transcript variant 1, mRNA. // chr4 // 100 // 100 // 25 // 25 // 0 /// NM_001166009 // RefSeq // Mus musculus transmembrane protein 215 (Tmem215), transcript variant 2, mRNA. // chr4 // 100 // 88 // 22 // 22 // 0 /// ENSMUST00000049655 // ENSEMBL // Transmembrane protein 215 gene:ENSMUSG00000046593 // chr4 // 100 // 100 // 2…	Tmem215	7.28107e-05	0.589472	10.3795	0.130104	1336.19	120.546	9.61926	0.0901571	787.65	50.5058	10.5377	10.223	10.4035	10.3538	9.75087	9.55096	9.57355	9.60167	1486.53	1195.13	1354.5	1308.63	861.596	750.109	761.949	776.946
NM_173414 // Lancl3 // LanC lantibiotic synthetase component C-like 3 (bacterial) // X A1.1|X // 236285 /// ENSMUST00000069763 // Lancl3 // LanC lantibiotic synthetase component C-like 3 (bacterial) // X A1.1|X // 236285 /// BC115944 // Lancl3 // LanC lantibiotic synthetase component C-like 3 (bacterial) // X A1.1|X // 236285 /// ENSMUST00000054724 // Lancl3 // LanC lantibiotic synthetase compone…	NM_173414 // RefSeq // Mus musculus LanC lantibiotic synthetase component C-like 3 (bacterial) (Lancl3), mRNA. // chrX // 100 // 90 // 27 // 27 // 0 /// ENSMUST00000069763 // ENSEMBL // Isoform 1 of LanC-like protein 3 gene:ENSMUSG00000047344 // chrX // 100 // 90 // 27 // 27 // 0 /// BC115944 // GenBank // Mus musculus LanC lantibiotic synthetase component C-like 3 (bacterial), mRNA (cDNA clone I…	Lancl3	0.000179618	0.58446	6.57618	0.121634	95.6755	8.21915	5.79987	0.145667	55.9184	5.43593	6.74052	6.58301	6.45398	6.52723	5.92921	5.59135	5.827	5.85195	106.93	95.87	87.6679	92.2341	60.9353	48.213	56.7676	57.758
NM_030004 // Cryl1 // crystallin, lambda 1 // 14 C3|14 20.0 cM // 68631 /// ENSMUST00000022517 // Cryl1 // crystallin, lambda 1 // 14 C3|14 20.0 cM // 68631 /// AF351609 // Cryl1 // crystallin, lambda 1 // 14 C3|14 20.0 cM // 68631 /// ENSMUST00000089502 // Cryl1 // crystallin, lambda 1 // 14 C3|14 20.0 cM // 68631	NM_030004 // RefSeq // Mus musculus crystallin, lambda 1 (Cryl1), mRNA. // chr14 // 100 // 89 // 32 // 32 // 0 /// ENSMUST00000022517 // ENSEMBL // Lambda-crystallin homolog gene:ENSMUSG00000021947 // chr14 // 100 // 89 // 32 // 32 // 0 /// AF351609 // GenBank // Mus musculus CRY (Cry) mRNA, complete cds. // chr14 // 97 // 89 // 31 // 32 // 0 /// ENSMUST00000089502 // ENSEMBL // Putative uncharac…	Cryl1	0.000783137	0.573579	8.29246	0.188808	315.54	40.9373	7.49209	0.173553	180.987	21.0439	8.48933	8.07686	8.40558	8.19807	7.46321	7.62343	7.62392	7.25778	359.371	270.009	339.104	293.674	176.462	197.188	197.256	153.042
NM_023115 // Pcdh15 // protocadherin 15 // 10 B5.3|10 40.2 cM // 11994 /// NM_001142735 // Pcdh15 // protocadherin 15 // 10 B5.3|10 40.2 cM // 11994 /// NM_001142736 // Pcdh15 // protocadherin 15 // 10 B5.3|10 40.2 cM // 11994 /// NM_001142740 // Pcdh15 // protocadherin 15 // 10 B5.3|10 40.2 cM // 11994 /// NM_001142738 // Pcdh15 // protocadherin 15 // 10 B5.3|10 40.2 cM // 11994 /// NM_001142739…	NM_023115 // RefSeq // Mus musculus protocadherin 15 (Pcdh15), transcript variant A, mRNA. // chr10 // 100 // 90 // 36 // 36 // 0 /// NM_001142735 // RefSeq // Mus musculus protocadherin 15 (Pcdh15), transcript variant B, mRNA. // chr10 // 100 // 90 // 36 // 36 // 0 /// NM_001142736 // RefSeq // Mus musculus protocadherin 15 (Pcdh15), transcript variant C, mRNA. // chr10 // 100 // 90 // 36 // 36 …	Pcdh15	0.00064506	0.567346	6.85855	0.229955	117.182	19.3385	6.05253	0.0955479	66.483	4.44163	6.87414	6.63043	6.76015	7.16947	6.02734	5.94644	6.17683	6.0595	117.307	99.0737	108.395	143.955	65.2245	61.6675	72.3453	66.6945
ENSMUST00000098469 // Gm10632 // predicted gene 10632 // --- // 100038583	ENSMUST00000098469 // ENSEMBL // Putative uncharacterized protein gene:ENSMUSG00000074134 // chr8 // 100 // 100 // 19 // 19 // 0	Gm10632	0.00859309	0.563574	6.77342	0.30035	111.188	23.0961	5.94398	0.311041	62.6628	13.8273	6.95811	6.4836	6.55488	7.09709	6.32923	5.71053	5.6734	6.06276	124.337	89.4864	94.0191	136.911	80.4062	52.365	51.0345	66.8455
NM_018869 // Grk5 // G protein-coupled receptor kinase 5 // 19 D3|19 55.0 cM // 14773 /// ENSMUST00000003313 // Grk5 // G protein-coupled receptor kinase 5 // 19 D3|19 55.0 cM // 14773 /// AF040746 // Grk5 // G protein-coupled receptor kinase 5 // 19 D3|19 55.0 cM // 14773	NM_018869 // RefSeq // Mus musculus G protein-coupled receptor kinase 5 (Grk5), mRNA. // chr19 // 100 // 100 // 33 // 33 // 0 /// ENSMUST00000003313 // ENSEMBL // G protein-coupled receptor kinase 5 gene:ENSMUSG00000003228 // chr19 // 100 // 100 // 33 // 33 // 0 /// AF040746 // GenBank // Mus musculus G protein-coupled receptor kinase 5 (GRK5) mRNA, complete cds. // chr19 // 100 // 94 // 31 // 31…	Grk5	2.42117e-05	0.563457	8.68928	0.129248	414.006	35.6845	7.86501	0.057885	233.275	9.34261	8.77759	8.77095	8.50133	8.70723	7.91616	7.8277	7.80356	7.91263	438.852	436.837	362.374	417.962	241.547	227.182	223.412	240.957
NM_175499 // Slitrk6 // SLIT and NTRK-like family, member 6 // 14 E3|14 // 239250 /// ENSMUST00000078386 // Slitrk6 // SLIT and NTRK-like family, member 6 // 14 E3|14 // 239250 /// BC138664 // Slitrk6 // SLIT and NTRK-like family, member 6 // 14 E3|14 // 239250	NM_175499 // RefSeq // Mus musculus SLIT and NTRK-like family, member 6 (Slitrk6), mRNA. // chr14 // 100 // 100 // 25 // 25 // 0 /// ENSMUST00000078386 // ENSEMBL // SLIT and NTRK-like protein 6 gene:ENSMUSG00000045871 // chr14 // 100 // 100 // 25 // 25 // 0 /// BC138664 // GenBank // Mus musculus SLIT and NTRK-like family, member 6, mRNA (cDNA clone MGC:170290 IMAGE:8861685), complete cds. // ch…	Slitrk6	0.00679349	0.551143	8.13631	0.279057	285.386	56.1195	7.27021	0.325349	157.288	34.6934	8.48285	7.84371	8.22435	7.99433	7.30107	6.85293	7.27929	7.64757	357.761	229.716	299.071	254.995	157.704	115.595	155.34	200.515
NM_016771 // Sult1d1 // sulfotransferase family 1D, member 1 // 5 E1|5 // 53315 /// ENSMUST00000113314 // Sult1d1 // sulfotransferase family 1D, member 1 // 5 E1|5 // 53315 /// BC066190 // Sult1d1 // sulfotransferase family 1D, member 1 // 5 E1|5 // 53315 /// ENSMUST00000076439 // Sult1d1 // sulfotransferase family 1D, member 1 // 5 E1|5 // 53315	NM_016771 // RefSeq // Mus musculus sulfotransferase family 1D, member 1 (Sult1d1), mRNA. // chr5 // 100 // 100 // 28 // 28 // 0 /// ENSMUST00000113314 // ENSEMBL // sulfotransferase family 1D, member 1 gene:ENSMUSG00000029273 // chr5 // 100 // 100 // 28 // 28 // 0 /// BC066190 // GenBank // Mus musculus sulfotransferase family 1D, member 1, mRNA (cDNA clone MGC:76663 IMAGE:30472198), complete cd…	Sult1d1	0.00747352	0.532971	7.37152	0.397148	170.04	42.1242	6.49115	0.200557	90.6265	13.0566	7.57044	7.39763	7.71045	6.80756	6.50175	6.39266	6.7664	6.30381	190.077	168.62	209.449	112.016	90.6195	84.0198	108.865	79.0018
NM_020277 // Trpm5 // transient receptor potential cation channel, subfamily M, member 5 // 7 F5|7 // 56843 /// ENSMUST00000009390 // Trpm5 // transient receptor potential cation channel, subfamily M, member 5 // 7 F5|7 // 56843 /// AB039952 // Trpm5 // transient receptor potential cation channel, subfamily M, member 5 // 7 F5|7 // 56843 /// ENSMUST00000150867 // Trpm5 // transient receptor poten…	NM_020277 // RefSeq // Mus musculus transient receptor potential cation channel, subfamily M, member 5 (Trpm5), mRNA. // chr7 // 100 // 97 // 28 // 28 // 0 /// ENSMUST00000009390 // ENSEMBL // Isoform 1 of Transient receptor potential cation channel subfamily M member 5 gene:ENSMUSG00000009246 // chr7 // 100 // 93 // 27 // 27 // 0 /// AB039952 // GenBank // Mus musculus Mtr1 mRNA for MLSN1- and T…	Trpm5	0.000553941	0.5302	7.04729	0.152097	132.817	13.9798	6.12385	0.231859	70.4197	11.4115	7.20646	6.8913	6.94639	7.14501	6.23944	5.90713	5.95551	6.39331	147.693	118.71	123.331	141.535	75.5542	60.01	62.0565	84.0579
NM_001081215 // Ddx60 // DEAD (Asp-Glu-Ala-Asp) box polypeptide 60 // 8 B3.1|8 // 234311 /// ENSMUST00000070631 // Ddx60 // DEAD (Asp-Glu-Ala-Asp) box polypeptide 60 // 8 B3.1|8 // 234311 /// BC013672 // Ddx60 // DEAD (Asp-Glu-Ala-Asp) box polypeptide 60 // 8 B3.1|8 // 234311 /// ENSMUST00000093485 // Ddx60 // DEAD (Asp-Glu-Ala-Asp) box polypeptide 60 // 8 B3.1|8 // 234311 /// ENSMUST00000154398 …	NM_001081215 // RefSeq // Mus musculus DEAD (Asp-Glu-Ala-Asp) box polypeptide 60 (Ddx60), mRNA. // chr8 // 100 // 100 // 39 // 39 // 0 /// ENSMUST00000070631 // ENSEMBL // DEAD (Asp-Glu-Ala-Asp) box polypeptide 60 gene:ENSMUSG00000037921 // chr8 // 100 // 100 // 39 // 39 // 0 /// BC013672 // GenBank // Mus musculus DEAD (Asp-Glu-Ala-Asp) box polypeptide 60, mRNA (cDNA clone IMAGE:4037887), comple…	Ddx60	0.000769136	0.52545	5.73337	0.241049	53.7812	9.48328	4.81339	0.167928	28.2593	3.24739	6.07388	5.73441	5.55823	5.56695	4.97795	4.61392	4.92336	4.73832	67.3626	53.2389	47.1189	47.4043	31.5147	24.4865	30.3443	26.6917
NM_173739 // Galntl4 // UDP-N-acetyl-alpha-D-galactosamine:polypeptide N-acetylgalactosaminyltransferase-like 4 // 7 F1|7 // 233733 /// ENSMUST00000049430 // Galntl4 // UDP-N-acetyl-alpha-D-galactosamine:polypeptide N-acetylgalactosaminyltransferase-like 4 // 7 F1|7 // 233733 /// BC024988 // Galntl4 // UDP-N-acetyl-alpha-D-galactosamine:polypeptide N-acetylgalactosaminyltransferase-like 4 // 7 F1…	NM_173739 // RefSeq // Mus musculus UDP-N-acetyl-alpha-D-galactosamine:polypeptide N-acetylgalactosaminyltransferase-like 4 (Galntl4), mRNA. // chr7 // 100 // 100 // 28 // 28 // 0 /// ENSMUST00000049430 // ENSEMBL // Putative polypeptide N-acetylgalactosaminyltransferase-like protein 4 gene:ENSMUSG00000038296 // chr7 // 100 // 100 // 28 // 28 // 0 /// BC024988 // GenBank // Mus musculus UDP-N-ace…	Galntl4	0.0006382	0.519101	7.58179	0.279877	194.467	41.113	6.65668	0.0550214	100.948	3.86541	7.46755	7.99975	7.40618	7.45367	6.72773	6.65552	6.64994	6.59354	176.994	255.955	169.621	175.299	105.986	100.812	100.423	96.5723
NM_009112 // S100a10 // S100 calcium binding protein A10 (calpactin) // 3 F1-F2|3 41.7 cM // 20194 /// ENSMUST00000045756 // S100a10 // S100 calcium binding protein A10 (calpactin) // 3 F1-F2|3 41.7 cM // 20194 /// BC025044 // S100a10 // S100 calcium binding protein A10 (calpactin) // 3 F1-F2|3 41.7 cM // 20194	NM_009112 // RefSeq // Mus musculus S100 calcium binding protein A10 (calpactin) (S100a10), mRNA. // chr3 // 100 // 100 // 25 // 25 // 0 /// ENSMUST00000045756 // ENSEMBL // Protein S100-A10 gene:ENSMUSG00000041959 // chr3 // 100 // 100 // 25 // 25 // 0 /// BC025044 // GenBank // Mus musculus S100 calcium binding protein A10 (calpactin), mRNA (cDNA clone MGC:36182 IMAGE:4949465), complete cds. //…	S100a10	0.00208804	0.511862	9.1161	0.300061	563.9	115.895	8.16085	0.216511	288.639	43.7771	9.46347	9.03817	9.21276	8.75	8.41617	7.99327	8.26447	7.96947	705.972	525.728	593.359	430.539	341.601	254.809	307.506	250.64
NM_012038 // Vsnl1 // visinin-like 1 // 12|12 A2 // 26950 /// ENSMUST00000072299 // Vsnl1 // visinin-like 1 // 12|12 A2 // 26950 /// AY101375 // Vsnl1 // visinin-like 1 // 12|12 A2 // 26950	NM_012038 // RefSeq // Mus musculus visinin-like 1 (Vsnl1), mRNA. // chr12 // 100 // 100 // 25 // 25 // 0 /// ENSMUST00000072299 // ENSEMBL // Visinin-like protein 1 gene:ENSMUSG00000054459 // chr12 // 100 // 96 // 24 // 24 // 0 /// AY101375 // GenBank // Mus musculus visinin-like protein 1 mRNA, complete cds. // chr12 // 100 // 88 // 22 // 22 // 0	Vsnl1	0.00019467	0.509286	7.49869	0.143775	181.54	18.4912	6.52105	0.195248	92.4556	12.0038	7.6943	7.48295	7.34823	7.46929	6.66744	6.49646	6.6662	6.2541	207.116	178.892	162.944	177.206	101.648	90.2882	101.561	76.3256
NM_010274 // Gpd2 // glycerol phosphate dehydrogenase 2, mitochondrial // 2 C1.1|2 33.0 cM // 14571 /// NM_001145820 // Gpd2 // glycerol phosphate dehydrogenase 2, mitochondrial // 2 C1.1|2 33.0 cM // 14571 /// ENSMUST00000028167 // Gpd2 // glycerol phosphate dehydrogenase 2, mitochondrial // 2 C1.1|2 33.0 cM // 14571 /// U60987 // Gpd2 // glycerol phosphate dehydrogenase 2, mitochondrial // 2 C1…	NM_010274 // RefSeq // Mus musculus glycerol phosphate dehydrogenase 2, mitochondrial (Gpd2), nuclear gene encoding mitochondrial protein, transcript variant 2, mRNA. // chr2 // 100 // 100 // 36 // 36 // 0 /// NM_001145820 // RefSeq // Mus musculus glycerol phosphate dehydrogenase 2, mitochondrial (Gpd2), nuclear gene encoding mitochondrial protein, transcript variant 1, mRNA. // chr2 // 100 // 9…	Gpd2	0.000520964	0.490993	9.35863	0.184019	660.387	80.4168	8.32534	0.245438	324.246	54.9782	9.46598	9.0987	9.36123	9.50862	8.62177	8.02475	8.36266	8.29217	707.203	548.255	657.675	728.416	393.923	260.429	329.164	313.466
NM_010923 // Nnat // neuronatin // 2 H1|2 88.0 cM // 18111 /// NM_180960 // Nnat // neuronatin // 2 H1|2 88.0 cM // 18111 /// ENSMUST00000109526 // Nnat // neuronatin // 2 H1|2 88.0 cM // 18111 /// ENSMUST00000088484 // Nnat // neuronatin // 2 H1|2 88.0 cM // 18111 /// AB004048 // Nnat // neuronatin // 2 H1|2 88.0 cM // 18111	NM_010923 // RefSeq // Mus musculus neuronatin (Nnat), transcript variant 1, mRNA. // chr2 // 100 // 82 // 32 // 32 // 0 /// NM_180960 // RefSeq // Mus musculus neuronatin (Nnat), transcript variant 2, mRNA. // chr2 // 100 // 64 // 25 // 25 // 0 /// ENSMUST00000109526 // ENSEMBL // Isoform 1 of Neuronatin gene:ENSMUSG00000067786 // chr2 // 100 // 82 // 32 // 32 // 0 /// ENSMUST00000088484 // ENSE…	Nnat	0.000231281	0.478851	7.15152	0.121738	142.549	11.7476	6.07748	0.246358	68.2598	11.3479	7.19043	7.16033	6.98322	7.27211	6.34487	6.16238	6.04506	5.7576	146.061	143.045	126.52	154.57	81.2822	71.6245	66.0306	54.1017
NM_153512 // Kcng3 // potassium voltage-gated channel, subfamily G, member 3 // 17 E4|17 // 225030 /// ENSMUST00000051482 // Kcng3 // potassium voltage-gated channel, subfamily G, member 3 // 17 E4|17 // 225030 /// AF454552 // Kcng3 // potassium voltage-gated channel, subfamily G, member 3 // 17 E4|17 // 225030	NM_153512 // RefSeq // Mus musculus potassium voltage-gated channel, subfamily G, member 3 (Kcng3), mRNA. // chr17 // 100 // 100 // 25 // 25 // 0 /// ENSMUST00000051482 // ENSEMBL // Isoform 1 of Potassium voltage-gated channel subfamily G member 3 gene:ENSMUSG00000045053 // chr17 // 100 // 100 // 25 // 25 // 0 /// AF454552 // GenBank // Mus musculus voltage-gated potassium channel subunit Kv10.1…	Kcng3	0.000253115	0.473992	7.86066	0.0498993	232.535	8.01452	6.76401	0.2808	110.22	21.0451	7.80138	7.90836	7.89484	7.83804	7.0701	6.89351	6.67115	6.42128	223.074	240.245	238.004	228.816	134.373	118.892	101.91	85.7035
NM_025590 // Acot11 // acyl-CoA thioesterase 11 // 4 C7|4 // 329910 /// ENSMUST00000102762 // Acot11 // acyl-CoA thioesterase 11 // 4 C7|4 // 329910 /// BC024426 // Fam151a // family with sequence simliarity 151, member A // 4 C7|4 // 230579 /// BC042492 // Acot11 // acyl-CoA thioesterase 11 // 4 C7|4 // 329910 /// ENSMUST00000047620 // Fam151a // family with sequence simliarity 151, member A // …	NM_025590 // RefSeq // Mus musculus acyl-CoA thioesterase 11 (Acot11), mRNA. // chr4 // 100 // 50 // 16 // 16 // 0 /// ENSMUST00000102762 // ENSEMBL // Acyl-coenzyme A thioesterase 11 gene:ENSMUSG00000034853 // chr4 // 100 // 50 // 16 // 16 // 0 /// BC024426 // GenBank // Mus musculus family with sequence simliarity 151, member A, mRNA (cDNA clone MGC:37208 IMAGE:4971419), complete cds. // chr4 /…	Acot11	0.000191288	0.468925	10.1044	0.210419	1109.84	167.174	9.01615	0.167669	520.433	61.8615	10.3914	9.88548	10.06	10.0807	9.05686	8.90401	9.23565	8.86807	1343.15	945.859	1067.48	1082.88	532.583	479.043	602.847	467.257

## Sheet: Supp Table 2
Table S2
Ingenuity enrichment analysis for disease and functions, based on the microarray dataset
© 2000-2017 QIAGEN. All rights reserved.
Categories	Diseases or Functions Annotation	p-Value	Predicted Activation State	Activation z-score	Flags	Molecules	# Molecules
Amino Acid Metabolism, Small Molecule Biochemistry	synthesis of amino acids	1.01e-08		0.277		ASNS,BCAT1,CTH,EGF,GAD1,MYC,PHGDH,PYCR1	8
Amino Acid Metabolism, Small Molecule Biochemistry	metabolism of amino acids	8.38e-08		0.391	bias	AASS,ASNS,BCAT1,CTH,EGF,GAD1,MYC,PHGDH,PYCR1,SLC7A5	10
Amino Acid Metabolism, Molecular Transport, Small Molecule Biochemistry	uptake of alpha-amino acid	8.66e-08		1.58	bias	APP,SERPINF1,SLC1A5,SLC6A9,SLC7A11,SLC7A5	6
Amino Acid Metabolism, Molecular Transport, Small Molecule Biochemistry	transport of amino acids	1.1e-07	Increased	2.084	bias	APP,MYC,SERPINF1,SLC1A4,SLC1A5,SLC6A9,SLC7A11,SLC7A3,SLC7A5	9
Amino Acid Metabolism, Small Molecule Biochemistry	synthesis of alpha-amino acid	1.54e-07				ASNS,BCAT1,CTH,MYC,PHGDH,PYCR1	6
Amino Acid Metabolism	quantity of amino acids	2.91e-07		0.214		APP,BCAT1,CTH,EGF,GAD1,GPD2,PHGDH,SLC6A9,SLC7A11,VGF	10
Amino Acid Metabolism, Small Molecule Biochemistry	synthesis of L-amino acid	2.15e-06				BCAT1,CTH,MYC,PHGDH,PYCR1	5
Amino Acid Metabolism, Molecular Transport, Small Molecule Biochemistry	uptake of L-amino acid	2.15e-06		1.284	bias	APP,SERPINF1,SLC1A5,SLC7A11,SLC7A5	5
Carbohydrate Metabolism, Molecular Transport	quantity of lactic acid	2.77e-06		1.067		APP,EDNRB,EGF,MYC,PCK2	5
Amino Acid Metabolism, Molecular Transport, Small Molecule Biochemistry	transport of neutral amino acid	8.06e-06				SLC1A4,SLC1A5,SLC6A9,SLC7A5	4
Cell Morphology, Cellular Assembly and Organization, Cellular Function and Maintenance	formation of cellular protrusions	8.41e-06		-0.136		APP,AREG,CAMK1D,CD81,CDKN1A,DCX,DOCK10,EGF,EIF4EBP1,ENG,EPHA7,GRK5,MYC,PCDH15,PHGDH,SERPINF1,SLITRK6,TENM4,TSGA10,UST,VGF	21
Cellular Compromise	stress response of tumor cell lines	1.11e-05		0		APP,CDKN1A,DDIT3,EIF4EBP1,NNAT	5
Cancer, Cell Morphology, Cellular Function and Maintenance, Organismal Injury and Abnormalities	autophagy of cancer cells	1.28e-05				DDIT3,NUPR1,TRIB3	3
Behavior	behavior	1.3e-05		-0.504		ADM2,ALDH1A3,AP1S2,APP,C1QA,CD81,CDKN1A,DHRS4,EGF,GAD1,GPD2,PCDH15,PTPRG,S100A10,SERPINF1,SLC1A4,SLC6A9,SLC7A11,SLITRK6,SYTL4,TRPM5,VGF	22
Cell Death and Survival	apoptosis of gonadal cell lines	1.32e-05		0.391		CDKN1A,DDIT3,EGF,MYC,S100A10	5
Amino Acid Metabolism, Post-Translational Modification, Small Molecule Biochemistry	modification of acidic amino acid	1.82e-05				ASNS,GAD1,PYCR1	3
Cellular Assembly and Organization, Cellular Function and Maintenance	microtubule dynamics	1.89e-05		1.192		APP,AREG,C1QA,CAMK1D,CD81,CDKN1A,DCX,DOCK10,DOCK5,EGF,EIF4EBP1,ENG,EPHA7,F13A1,GRK5,MYC,PCDH15,PHGDH,SERPINF1,SLITRK6,TENM4,TSGA10,UST,VGF	24
Developmental Disorder, Hereditary Disorder, Organismal Injury and Abnormalities	Neu-Laxova syndrome	2.92e-05				PHGDH,PSAT1	2
Cancer, Cellular Movement, Organismal Injury and Abnormalities	invasion of RPE cells	2.92e-05				EGF,MYC	2
Cellular Growth and Proliferation	cytostasis of prostate cancer cell lines	3.31e-05				CDKN1A,CTH,EGF	3
Amino Acid Metabolism, Molecular Transport, Small Molecule Biochemistry	transport of alpha-amino acid	3.95e-05	Increased	2.195	bias	SLC1A4,SLC1A5,SLC6A9,SLC7A3,SLC7A5	5
Cancer, Organismal Injury and Abnormalities, Respiratory Disease	growth of lung tumor	4.23e-05		-1.172		DDIT3,EGF,EIF4EBP1,MYC,S100A10	5
Amino Acid Metabolism, Molecular Transport, Small Molecule Biochemistry	concentration of neutral amino acid	4.29e-05				BCAT1,EGF,SLC6A9	3
Amino Acid Metabolism, Lipid Metabolism, Small Molecule Biochemistry	metabolism of GABA	4.29e-05				EGF,GAD1,PHGDH	3
Cancer, Organismal Injury and Abnormalities, Reproductive System Disease	uterine tumor	5.04e-05				AASS,AP1S2,APP,BCAT1,CTH,DCX,DDX60,DOCK10,DOCK5,EDNRB,EGF,EIF4EBP1,ENG,EPHA7,EPRS,ETV5,F13A1,FUT1,GRK5,GTPBP2,INPP4B,MAPK4,MTHFD2,MYC,PCDH15,RASGRF2,SEL1L,SEMA3C,SESN2,SGIP1,SLC2A2,SLC35F1,SLC7A3,SLC7A5,SLITRK6,SPARCL1,SPATS2,ST8SIA5,STARD5,SV2C,TMEM215,TRPM5,ZCCHC12	43
Cancer, Organismal Injury and Abnormalities, Reproductive System Disease	endometrial carcinoma	5.08e-05				AASS,AP1S2,APP,BCAT1,CTH,DDX60,DOCK10,DOCK5,EGF,ENG,EPHA7,EPRS,ETV5,F13A1,FUT1,GRK5,GTPBP2,INPP4B,MAPK4,MTHFD2,PCDH15,RASGRF2,SEL1L,SEMA3C,SESN2,SGIP1,SLC2A2,SLC35F1,SLITRK6,SPARCL1,SPATS2,ST8SIA5,STARD5,SV2C,TMEM215,TRPM5,ZCCHC12	37
Cancer, Organismal Injury and Abnormalities, Reproductive System Disease	endometrial cancer	5.45e-05				AASS,AP1S2,APP,BCAT1,CTH,DDX60,DOCK10,DOCK5,EDNRB,EGF,ENG,EPHA7,EPRS,ETV5,F13A1,FUT1,GRK5,GTPBP2,INPP4B,MAPK4,MTHFD2,PCDH15,RASGRF2,SEL1L,SEMA3C,SESN2,SGIP1,SLC2A2,SLC35F1,SLC7A5,SLITRK6,SPARCL1,SPATS2,ST8SIA5,STARD5,SV2C,TMEM215,TRPM5,ZCCHC12	39
Cancer, Organismal Injury and Abnormalities, Reproductive System Disease	endometrioid endometrial adenocarcinoma	6.24e-05				AASS,AP1S2,APP,BCAT1,CTH,DDX60,DOCK10,DOCK5,EGF,ENG,EPHA7,EPRS,F13A1,FUT1,GRK5,GTPBP2,INPP4B,MAPK4,MTHFD2,PCDH15,RASGRF2,SEL1L,SEMA3C,SESN2,SGIP1,SLC2A2,SLC35F1,SLITRK6,SPARCL1,SPATS2,ST8SIA5,STARD5,SV2C,TMEM215,TRPM5,ZCCHC12	36
Cellular Development, Cellular Growth and Proliferation	cell proliferation of hepatoma cell lines	6.92e-05		0.01		AREG,ASNS,ATF5,CD81,CDKN1A,EGF,ENG,TRIB3	8
Carbohydrate Metabolism	utilization of carbohydrate	8.64e-05				APP,CTH,MYC,SLC2A2	4
Immunological Disease, Inflammatory Disease, Inflammatory Response, Organismal Injury and Abnormalities, Renal and Urological Disease, Respiratory Disease	Goodpasture syndrome	8.74e-05				ASNS,DDIT3	2
Cellular Compromise	stress response of rhabdomyosarcoma cell lines	8.74e-05				CDKN1A,EIF4EBP1	2
Cellular Movement	migration of tumor cell lines	9.24e-05		1.93		ACTA2,APP,AREG,ASNS,CD81,CDKN1A,EGF,ENG,ETV5,LYVE1,MYC,S100A10,SERPINF1,SHC4,SPARCL1,VGF,VSNL1	17
Cell Cycle	interphase of breast cell lines	0.0001				CDKN1A,EGF,MYC	3
Cellular Assembly and Organization, Cellular Function and Maintenance, Organ Morphology, Skeletal and Muscular System Development and Function, Tissue Morphology	quantity of smooth muscle cells	0.000103		1		APP,C1QA,CDKN1A,ENG	4
Cancer, Cellular Development, Cellular Growth and Proliferation, Organismal Injury and Abnormalities, Respiratory Disease, Tumor Morphology	proliferation of lung cancer cells	0.000113		-0.686		DDIT3,EGF,EIF4EBP1,MYC	4
Cancer, Organismal Injury and Abnormalities	breast or colorectal cancer	0.000115				AASS,ACTA2,ADM2,ALDH1A3,ALDH1L2,APP,AREG,ARL14EP,B3GNT9,BCAT1,CAMK1D,CDKN1A,CHAC1,CRYL1,DCX,DDIT3,DDX60,DHRS4,DOCK10,DOCK5,EDNRB,EGF,EIF4EBP1,ENG,EPRS,ETV5,F13A1,FAM135B,FAM151A,FZD4,GAD1,GRK5,HMGCS1,INPP4B,JADE3,KCNG3,LMO1,LYVE1,MAPK4,MYC,OR2T4,PCDH15,PSAT1,PTPRG,RASGRF2,RCC2,SEL1L,SEMA3C,SERPINF1,SLC1A4,SLC2A2,SLC35F1,SLC6A9,SLC7A11,SLC7A3,SLC7A5,SLITRK6,SNTG1,SPARCL1,SV2C,TRIB3,TRPM5,TSGA10,US…	66
Cellular Development, Cellular Growth and Proliferation, Embryonic Development, Organismal Development	proliferation of embryonic stem cells	0.000133		1.033	bias	APP,CDKN1A,MYC,SERPINF1	4
Cellular Growth and Proliferation, Organ Development, Reproductive System Development and Function	proliferation of ovarian cells	0.000133		1.154		AREG,CDKN1A,EGF,MYC	4
Cell Death and Survival	cell death of macrophages	0.000136		1.264		APP,C1QA,CDKN1A,DDIT3,SERPINF1,SLC7A11	6
Cellular Growth and Proliferation, Organ Development, Reproductive System Development and Function	proliferation of gonadal cells	0.000139		1.165		AREG,CDKN1A,EGF,ETV5,MYC	5
Cell Death and Survival	cell death of hepatoma cell lines	0.000147		-0.157		AREG,CDKN1A,DDIT3,EGF,MYC,SERPINF1,SLC7A11	7
Cancer, Organismal Injury and Abnormalities	malignant solid tumor	0.000153		-1.04		AASS,ABTB2,ACTA2,ADM2,ALDH1A3,ALDH1L2,AP1S2,APP,AREG,ARL14EP,ASNS,ATF5,B3GNT9,BCAT1,C1QA,CAMK1D,CD81,CDKN1A,CHAC1,CRYL1,CTH,CYP39A1,DCX,DDIT3,DDX60,DHRS4,DOCK10,DOCK5,EDNRB,EGF,EIF4EBP1,ENG,EPHA7,EPRS,ETV5,F13A1,FAM129A,FAM135B,FAM151A,FUT1,FZD4,GAD1,GNA14,GPD2,GPT2,GRAMD1B,GRK5,GTPBP2,HMGCS1,INPP4B,IZUMO1,JADE3,KCNAB3,KCNG3,LANCL3,LMO1,LYVE1,MAPK4,MTHFD2,MYC,NNAT,NRSN1,NUPR1,OR2T4,PCDH15,PCK2,PH…	108
Connective Tissue Development and Function, Tissue Morphology	quantity of white adipose tissue	0.000154		0.277		CDKN1A,EIF4EBP1,GPD2,MYC,VGF	5
Amino Acid Metabolism, Molecular Transport, Small Molecule Biochemistry	transport of serine family amino acid	0.000166				SLC1A4,SLC1A5,SLC6A9	3
Hereditary Disorder, Organismal Injury and Abnormalities	autosomal recessive disease	0.000169				AASS,ALDH1A3,APP,ARL14EP,ASNS,C1QA,EGF,F13A1,GAD1,GPT2,MYC,NNAT,PCDH15,PHGDH,PSAT1,PYCR1,SERPINF1,SLC1A4,SLC7A11,SLITRK6,SMOC1	21
Cancer, Organismal Injury and Abnormalities	genitourinary tumor	0.000169				AASS,ADM2,AP1S2,APP,ASNS,BCAT1,CDKN1A,CHAC1,CTH,DCX,DDIT3,DDX60,DOCK10,DOCK5,EDNRB,EGF,EIF4EBP1,ENG,EPHA7,EPRS,ETV5,F13A1,FAM135B,FUT1,FZD4,GNA14,GPD2,GRAMD1B,GRK5,GTPBP2,INPP4B,KCNAB3,LYVE1,MAPK4,MTHFD2,MYC,NNAT,OR2T4,PCDH15,PCK2,PSAT1,PTPRG,RASGRF2,RCC2,SEL1L,SEMA3C,SESN2,SGIP1,SHC4,SLC1A4,SLC2A2,SLC35F1,SLC6A9,SLC7A3,SLC7A5,SLITRK6,SNTG1,SPARCL1,SPATS2,ST8SIA5,STARD5,SV2C,SYTL4,TMEM215,TRIB3,T…	71
Cancer, Organismal Injury and Abnormalities, Reproductive System Disease	uterine cancer	0.00017				AASS,AP1S2,APP,BCAT1,CTH,DDX60,DOCK10,DOCK5,EDNRB,EGF,ENG,EPHA7,EPRS,ETV5,F13A1,FUT1,GRK5,GTPBP2,INPP4B,MAPK4,MTHFD2,MYC,PCDH15,RASGRF2,SEL1L,SEMA3C,SESN2,SGIP1,SLC2A2,SLC35F1,SLC7A5,SLITRK6,SPARCL1,SPATS2,ST8SIA5,STARD5,SV2C,TMEM215,TRPM5,ZCCHC12	40
Metabolic Disease, Neurological Disease, Organismal Injury and Abnormalities, Psychological Disorders	advanced Alzheimer disease	0.000174				APP,DCX	2
Cellular Growth and Proliferation	clonogenicity of lung cancer cell lines	0.000174				ACTA2,ALDH1A3	2
Cancer, Hematological Disease, Immunological Disease, Organismal Injury and Abnormalities	delay in tumorigenesis of lymphoma	0.000174				CDKN1A,MYC	2
Cell-To-Cell Signaling and Interaction	detachment of fibroblast cell lines	0.000174				EGF,MYC	2
Cell Cycle	premature senescence of carcinoma cell lines	0.000174				CDKN1A,EIF4EBP1	2
Cell Cycle	premature senescence of lung cancer cell lines	0.000174				CDKN1A,EIF4EBP1	2
Cell Death and Survival, Cellular Development, Cellular Function and Maintenance	self-renewal of brain cancer cell lines	0.000174				FZD4,SEL1L	2
Cell Morphology, Hematological System Development and Function	size of B-lymphocyte derived cell lines	0.000174				EIF4EBP1,MYC	2
Amino Acid Metabolism, Molecular Transport, Small Molecule Biochemistry	transport of L-glutamine	0.000174				SLC1A4,SLC1A5	2
Amino Acid Metabolism, Molecular Transport, Small Molecule Biochemistry	uptake of L-tryptophan	0.000174				SLC1A5,SLC7A5	2
Cancer, Organismal Injury and Abnormalities	tumorigenesis of tissue	0.000194		-0.313		AASS,ABTB2,ACTA2,ADM2,ALDH1A3,ALDH1L2,AP1S2,APP,AREG,ARL14EP,ASNS,ATF5,B3GNT9,BCAT1,CAMK1D,CD81,CDKN1A,CHAC1,CTH,CYP39A1,DCX,DDIT3,DDX60,DHRS4,DOCK10,DOCK5,EDNRB,EGF,EIF4EBP1,ENG,EPHA7,EPRS,ETV5,F13A1,FAM129A,FAM135B,FAM151A,FUT1,FZD4,GAD1,GNA14,GPD2,GPT2,GRAMD1B,GRK5,GTPBP2,HMGCS1,INPP4B,IZUMO1,KCNAB3,KCNG3,LANCL3,LMO1,LYVE1,MAPK4,MTHFD2,MYC,NRSN1,NUPR1,OR2T4,PCDH15,PCK2,PHGDH,PSAT1,PTPRG,RASGRF…	103
Cell Morphology, Cellular Assembly and Organization, Cellular Development, Cellular Function and Maintenance, Cellular Growth and Proliferation, Nervous System Development and Function, Organismal Development, Tissue Development	neuritogenesis	0.0002		-0.209		APP,AREG,CAMK1D,CDKN1A,DCX,DOCK10,EIF4EBP1,EPHA7,PHGDH,SERPINF1,SLITRK6,TENM4,UST,VGF	14
Cellular Compromise	stress response of cells	0.000211		0.292		APP,CDKN1A,DDIT3,EIF4EBP1,MYC,NNAT	6
Carbohydrate Metabolism, Molecular Transport, Small Molecule Biochemistry	accumulation of inositol phosphate	0.000212				APP,EDNRB,GNA14,GRK5	4
Cell Death and Survival	quantity of apoptotic cells	0.000216		1.982		APP,CDKN1A,DDIT3,EGF,MYC	5
Carbohydrate Metabolism, Small Molecule Biochemistry	consumption of D-glucose	0.000223				CTH,MYC,SLC2A2	3
Cell Cycle	interphase of hepatoma cell lines	0.000223				ATF5,CDKN1A,DDIT3	3
Organ Development, Reproductive System Development and Function	growth of ovarian follicle	0.000227		1.195	bias	AREG,CDKN1A,EGF,MYC	4
Cancer, Gastrointestinal Disease, Organismal Injury and Abnormalities	gastroesophageal adenocarcinoma	0.000235				DOCK10,DOCK5,EDNRB,ENG,EPHA7,F13A1,FAM135B,GAD1,GPD2,INPP4B,KCNAB3,MYC,OR2T4,PCDH15,PHGDH,PTPRG,RASGRF2,SEL1L,SGIP1,SHC4,SLC1A5,SLITRK6,SNTG1,VGF,XPOT	25
Connective Tissue Development and Function, Tissue Morphology	quantity of connective tissue cells	0.000236		-1.4		Cald1,CD81,CDKN1A,EGF,EIF4EBP1,F13A1,INPP4B,MYC	8
Amino Acid Metabolism, Small Molecule Biochemistry	metabolism of amino acid analogs	0.000244				EGF,GAD1,MTHFD2,PHGDH	4
Cardiovascular System Development and Function, Cell Death and Survival	cell viability of endothelial cell lines	0.000255				CTH,EGF,MYC	3
Cellular Development	epithelial-mesenchymal transition of colorectal cancer cell lines	0.000255				EGF,MYC,SPARCL1	3
Organ Morphology, Tissue Morphology	quantity of dermal cells	0.000255				CDKN1A,EGF,MYC	3
Cancer, Gastrointestinal Disease, Organismal Injury and Abnormalities	gastroesophageal cancer	0.000256				ATF5,CDKN1A,DOCK10,DOCK5,EDNRB,ENG,EPHA7,F13A1,FAM135B,FZD4,GAD1,GPD2,INPP4B,KCNAB3,MYC,OR2T4,PCDH15,PHGDH,PTPRG,RASGRF2,SEL1L,SGIP1,SHC4,SLC1A5,SLITRK6,SNTG1,VGF,XPOT	28
Organismal Development	formation of vessel	0.000271		0		APP,C1QA,CTH,EGF,ENG,INPP4B,SERPINF1	7
Cancer, Gastrointestinal Disease, Organismal Injury and Abnormalities	digestive system cancer	0.000272				AASS,ABTB2,ACTA2,ADM2,ALDH1A3,ALDH1L2,AP1S2,APP,AREG,ARL14EP,ATF5,B3GNT9,BCAT1,CAMK1D,CDKN1A,CHAC1,CRYL1,CTH,CYP39A1,DCX,DDIT3,DDX60,DOCK10,DOCK5,EDNRB,EGF,EIF4EBP1,ENG,EPHA7,EPRS,ETV5,F13A1,FAM129A,FAM135B,FAM151A,FUT1,FZD4,GAD1,GPD2,GPT2,GRAMD1B,GRK5,GTPBP2,HMGCS1,INPP4B,IZUMO1,JADE3,KCNAB3,KCNG3,LANCL3,LMO1,LYVE1,MAPK4,MYC,NRSN1,NUPR1,OR2T4,PCDH15,PCK2,PHGDH,PSAT1,PTPRG,RASGRF2,RCC2,SEL1L,SEMA…	95
Digestive System Development and Function, Gastrointestinal Disease, Organ Morphology, Organismal Development, Organismal Injury and Abnormalities	abnormal morphology of crypt of lieberkuhn	0.000279				AREG,CDKN1A,EDNRB,EGF	4
Cell Cycle	arrest in G2/M phase transition	0.000279				ATF5,CDKN1A,EGF,MYC	4
Cancer, Gastrointestinal Disease, Organismal Injury and Abnormalities	gastrointestinal tract cancer	0.000284				AASS,ABTB2,ACTA2,ADM2,ALDH1A3,ALDH1L2,APP,AREG,ARL14EP,ATF5,B3GNT9,BCAT1,CAMK1D,CDKN1A,CHAC1,CRYL1,DCX,DDIT3,DDX60,DOCK10,DOCK5,EDNRB,EGF,EIF4EBP1,ENG,EPHA7,EPRS,ETV5,F13A1,FAM129A,FAM135B,FAM151A,FUT1,FZD4,GAD1,GPD2,GPT2,GRAMD1B,GRK5,GTPBP2,HMGCS1,INPP4B,IZUMO1,JADE3,KCNAB3,KCNG3,LANCL3,MAPK4,MYC,NRSN1,OR2T4,PCDH15,PHGDH,PSAT1,PTPRG,RASGRF2,RCC2,SEL1L,SEMA3C,SESN2,SGIP1,SHC4,SLC1A4,SLC1A5,SLC2A2…	86
Cancer, Organismal Injury and Abnormalities	neoplasia of epithelial tissue	0.000287		-0.313		AASS,ABTB2,ACTA2,ADM2,ALDH1A3,ALDH1L2,AP1S2,APP,AREG,ARL14EP,ASNS,ATF5,B3GNT9,BCAT1,CAMK1D,CD81,CDKN1A,CHAC1,CTH,CYP39A1,DCX,DDIT3,DDX60,DHRS4,DOCK10,DOCK5,EDNRB,EGF,EIF4EBP1,ENG,EPHA7,EPRS,ETV5,F13A1,FAM129A,FAM135B,FAM151A,FUT1,FZD4,GAD1,GNA14,GPD2,GPT2,GRAMD1B,GRK5,GTPBP2,HMGCS1,INPP4B,IZUMO1,KCNAB3,KCNG3,LANCL3,LMO1,LYVE1,MAPK4,MTHFD2,MYC,NRSN1,NUPR1,OR2T4,PCDH15,PCK2,PHGDH,PSAT1,PTPRG,RASGRF…	102
Cell Cycle, Reproductive System Development and Function	G1/S phase transition of breast cell lines	0.000289				EGF,MYC	2
Cell Death and Survival, Connective Tissue Development and Function	cell survival of fibroblasts	0.000289				ATF5,CDKN1A	2
Cellular Growth and Proliferation	clonogenicity of carcinoma cell lines	0.000289				ACTA2,ALDH1A3	2
Cell Cycle, Cell-To-Cell Signaling and Interaction, Cellular Growth and Proliferation	contact growth inhibition of prostate cancer cell lines	0.000289				CDKN1A,CTH	2
Cellular Development	epithelial-mesenchymal transition of endometrial cancer cell lines	0.000289				ETV5,MYC	2
Cellular Movement	invasion of bone marrow cell lines	0.000289				EGF,SLC7A11	2
Amino Acid Metabolism	quantity of D-serine	0.000289				APP,PHGDH	2
Drug Metabolism, Molecular Transport	depletion of glutathione	0.00029				APP,CHAC1,MYC	3
DNA Replication, Recombination, and Repair	synthesis of genomic DNA	0.00029				CDKN1A,EGF,MYC	3
Cancer, Organismal Injury and Abnormalities	urogenital cancer	0.000326				AASS,ADM2,AP1S2,APP,ASNS,BCAT1,CDKN1A,CHAC1,CTH,DDIT3,DDX60,DOCK10,DOCK5,EDNRB,EGF,EIF4EBP1,ENG,EPHA7,EPRS,ETV5,F13A1,FAM135B,FUT1,FZD4,GNA14,GPD2,GRAMD1B,GRK5,GTPBP2,INPP4B,KCNAB3,LYVE1,MAPK4,MTHFD2,MYC,NNAT,OR2T4,PCDH15,PCK2,PSAT1,PTPRG,RASGRF2,RCC2,SEL1L,SEMA3C,SESN2,SGIP1,SHC4,SLC1A4,SLC2A2,SLC35F1,SLC6A9,SLC7A5,SLITRK6,SNTG1,SPARCL1,SPATS2,ST8SIA5,STARD5,SV2C,SYTL4,TMEM215,TRIB3,TRPM5,TSGA10…	69
Cancer, Organismal Injury and Abnormalities, Reproductive System Disease	tumorigenesis of reproductive tract	0.000329				AASS,AP1S2,APP,BCAT1,CDKN1A,CTH,DCX,DDX60,DOCK10,DOCK5,EDNRB,EGF,EIF4EBP1,ENG,EPHA7,EPRS,ETV5,F13A1,FUT1,GRK5,GTPBP2,INPP4B,MAPK4,MTHFD2,MYC,PCDH15,PCK2,PSAT1,PTPRG,RASGRF2,SEL1L,SEMA3C,SESN2,SGIP1,SLC2A2,SLC35F1,SLC7A3,SLC7A5,SLITRK6,SNTG1,SPARCL1,SPATS2,ST8SIA5,STARD5,SV2C,TMEM215,TRIB3,TRPM5,ZCCHC12	49
Cancer, Organismal Injury and Abnormalities, Reproductive System Disease	female genital neoplasm	0.000336				AASS,AP1S2,APP,BCAT1,CDKN1A,CTH,DCX,DDX60,DOCK10,DOCK5,EDNRB,EGF,EIF4EBP1,ENG,EPHA7,EPRS,ETV5,F13A1,FUT1,GRK5,GTPBP2,INPP4B,MAPK4,MTHFD2,MYC,PCDH15,PCK2,PSAT1,PTPRG,RASGRF2,SEL1L,SEMA3C,SESN2,SGIP1,SLC2A2,SLC35F1,SLC7A3,SLC7A5,SLITRK6,SNTG1,SPARCL1,SPATS2,ST8SIA5,STARD5,SV2C,TMEM215,TRIB3,TRPM5,ZCCHC12	49
Amino Acid Metabolism, Molecular Transport, Small Molecule Biochemistry	transport of L-amino acid	0.000339		1.969	bias	SLC1A4,SLC1A5,SLC7A3,SLC7A5	4
Cellular Development, Skeletal and Muscular System Development and Function, Tissue Development	differentiation of muscle cells	0.000344		1.664		AREG,AW551984,Bhlhe41,CD81,CDKN1A,DDIT3,ENG,MYC,NUPR1	9
Cancer, Organismal Injury and Abnormalities	tumorigenesis of epithelial neoplasm	0.000346		0.449		AASS,ACTA2,ADM2,ALDH1A3,ALDH1L2,AP1S2,APP,ARL14EP,B3GNT9,BCAT1,CAMK1D,CDKN1A,CHAC1,CTH,DCX,DDIT3,DDX60,DOCK10,DOCK5,EDNRB,EGF,EIF4EBP1,ENG,EPHA7,EPRS,ETV5,F13A1,FAM135B,FAM151A,FUT1,GAD1,GPD2,GRAMD1B,GRK5,GTPBP2,INPP4B,KCNAB3,KCNG3,MAPK4,MTHFD2,MYC,OR2T4,PCDH15,PHGDH,PSAT1,PTPRG,RASGRF2,RCC2,SEL1L,SEMA3C,SESN2,SGIP1,SLC1A4,SLC1A5,SLC2A2,SLC35F1,SLC6A9,SLC7A11,SLC7A3,SLC7A5,SLITRK6,SNTG1,SPARCL1,S…	75
Cancer, Gastrointestinal Disease, Organismal Injury and Abnormalities	malignant neoplasm of large intestine	0.000348				AASS,ABTB2,ACTA2,ADM2,ALDH1A3,ALDH1L2,APP,AREG,ARL14EP,ATF5,B3GNT9,BCAT1,CAMK1D,CDKN1A,CHAC1,CRYL1,DCX,DDIT3,DDX60,DOCK10,DOCK5,EDNRB,EGF,EIF4EBP1,ENG,EPHA7,EPRS,ETV5,F13A1,FAM129A,FAM135B,FAM151A,FUT1,FZD4,GAD1,GPD2,GPT2,GRAMD1B,GRK5,GTPBP2,HMGCS1,INPP4B,IZUMO1,JADE3,KCNG3,LANCL3,MAPK4,MYC,NRSN1,OR2T4,PCDH15,PSAT1,PTPRG,RASGRF2,RCC2,SEL1L,SEMA3C,SESN2,SGIP1,SHC4,SLC1A4,SLC2A2,SLC35F1,SLC6A9,SLC7…	83
Cell Death and Survival	apoptosis of macrophages	0.000351		1.206		APP,C1QA,CDKN1A,DDIT3,SERPINF1	5
Cellular Movement	cell movement of tumor cell lines	0.000353	Increased	2.121		ACTA2,APP,AREG,ASNS,CD81,CDKN1A,EDNRB,EGF,ENG,ETV5,LYVE1,MYC,S100A10,SERPINF1,SHC4,SPARCL1,VGF,VSNL1	18
Cancer, Organismal Injury and Abnormalities, Respiratory Disease	growth of lung carcinoma	0.00037				DDIT3,EGF,S100A10	3
Cellular Assembly and Organization, Cellular Function and Maintenance	organization of cytoplasm	0.000391		1.254		APP,AREG,C1QA,CAMK1D,CD81,CDKN1A,DCX,DOCK10,DOCK5,EGF,EIF4EBP1,ENG,EPHA7,F13A1,GRK5,MYC,PCDH15,PHGDH,SERPINF1,SESN2,SLITRK6,TENM4,TSGA10,UST,VGF	25
Amino Acid Metabolism, Small Molecule Biochemistry	synthesis of glutamine family amino acid	0.000415				BCAT1,MYC,PYCR1	3
Cancer, Gastrointestinal Disease, Organismal Injury and Abnormalities	gastro-esophageal carcinoma	0.000417				ATF5,DOCK10,DOCK5,EDNRB,ENG,EPHA7,F13A1,FAM135B,GAD1,GPD2,INPP4B,KCNAB3,MYC,OR2T4,PCDH15,PHGDH,PTPRG,RASGRF2,SEL1L,SGIP1,SHC4,SLC1A5,SLITRK6,SNTG1,VGF,XPOT	26
Cellular Assembly and Organization, Cellular Function and Maintenance	formation of hemidesmosomes	0.000432				EGF,MYC	2
DNA Replication, Recombination, and Repair, Energy Production, Nucleic Acid Metabolism, Small Molecule Biochemistry	oxidation of NADH	0.000432				PCK2,PYCR1	2
Cell Cycle	ploidy of chromosomes	0.000432				APP,MYC	2
Cell Cycle, Connective Tissue Development and Function	re-entry into S phase of fibroblasts	0.000432				CDKN1A,MYC	2
Cell Cycle	termination of cell cycle progression	0.000432				CDKN1A,MYC	2
Cancer, Organismal Injury and Abnormalities	transformation of T lymphocytes	0.000432				MYC,RASGRF2	2
Amino Acid Metabolism, Molecular Transport, Small Molecule Biochemistry	transport of L-lysine	0.000432				SLC7A3,SLC7A5	2
Amino Acid Metabolism, Molecular Transport, Small Molecule Biochemistry	transport of cystine	0.000432				SLC1A4,SLC7A11	2
Cell Death and Survival	apoptosis of hepatoma cell lines	0.000454		0.09		AREG,CDKN1A,DDIT3,EGF,MYC,SERPINF1	6
Nervous System Development and Function, Organ Morphology, Organismal Development	mass of brain	0.000459				APP,CD81,CDKN1A,DDIT3	4
Cellular Development, Cellular Growth and Proliferation	cell proliferation of tumor cell lines	0.000462		0.122		APP,AREG,ASNS,ATF5,CD81,CDKN1A,DCX,DDIT3,EGF,EIF4EBP1,ENG,GRK5,INPP4B,LMO1,MYC,NNAT,PCK2,PHGDH,PTPRG,S100A10,SEL1L,SERPINF1,SLC7A11,SLC7A5,SPARCL1,TRIB3	26
Cellular Function and Maintenance	endocytosis by kidney cell lines	0.000463				APP,EGF,SGIP1	3
Cell Cycle	exit from interphase	0.000463				CDKN1A,EGF,MYC	3
Cell Cycle	G2/M phase transition	0.000464				ATF5,Cald1,CDKN1A,EGF,MYC	5
Cellular Development, Cellular Growth and Proliferation, Nervous System Development and Function, Tissue Development	development of neurons	0.000466		0.705		APP,AREG,CAMK1D,CDKN1A,DCX,DOCK10,EGF,EIF4EBP1,EPHA7,PHGDH,SERPINF1,SLITRK6,SPARCL1,TENM4,UST,VGF	16
Carbohydrate Metabolism, Molecular Transport	transport of monosaccharide	0.000481		-0.884		APP,EGF,MYC,SESN2,SLC2A2,TRIB3	6
Cancer, Organismal Injury and Abnormalities	fibrosarcoma	0.000486				CDKN1A,MYC,S100A10,SLC7A11	4
Cellular Development, Cellular Growth and Proliferation	cell proliferation of brain cancer cell lines	0.000514		-0.311		CDKN1A,DCX,EGF,MYC,NNAT,SEL1L,SLC7A11	7
Cancer, Organismal Injury and Abnormalities	abdominal cancer	0.000522				AASS,ABTB2,ACTA2,ADM2,ALDH1A3,ALDH1L2,AP1S2,APP,AREG,ARL14EP,ASNS,ATF5,B3GNT9,BCAT1,CAMK1D,CDKN1A,CHAC1,CRYL1,CTH,CYP39A1,DCX,DDIT3,DDX60,DOCK10,DOCK5,EDNRB,EGF,EIF4EBP1,ENG,EPHA7,EPRS,ETV5,F13A1,FAM129A,FAM135B,FAM151A,FUT1,FZD4,GAD1,GNA14,GPD2,GPT2,GRAMD1B,GRK5,GTPBP2,HMGCS1,INPP4B,IZUMO1,JADE3,KCNAB3,KCNG3,LANCL3,LMO1,LYVE1,MAPK4,MTHFD2,MYC,NNAT,NRSN1,NUPR1,OR2T4,PCDH15,PCK2,PHGDH,PSAT1,PTPRG,…	100
Cellular Growth and Proliferation	arrest in proliferation of cells	0.000526				CDKN1A,DDIT3,EGF,ENG,MYC,NUPR1,SLC7A5	7
Cancer, Organismal Injury and Abnormalities	tumorigenesis of malignant tumor	0.00056				AASS,ACTA2,ADM2,ALDH1A3,ALDH1L2,AP1S2,APP,ARL14EP,B3GNT9,BCAT1,CAMK1D,CDKN1A,CHAC1,CTH,DCX,DDIT3,DDX60,DOCK10,DOCK5,EDNRB,EGF,ENG,EPHA7,EPRS,ETV5,F13A1,FAM135B,FAM151A,FUT1,GAD1,GPD2,GRAMD1B,GRK5,GTPBP2,INPP4B,KCNAB3,KCNG3,LMO1,MAPK4,MTHFD2,MYC,OR2T4,PCDH15,PHGDH,PTPRG,RASGRF2,RCC2,SEL1L,SEMA3C,SESN2,SGIP1,SLC1A4,SLC1A5,SLC2A2,SLC35F1,SLC6A9,SLC7A11,SLC7A3,SLC7A5,SLITRK6,SNTG1,SPARCL1,SPATS2,ST8S…	74
Cancer, Organismal Injury and Abnormalities	genitourinary carcinoma	0.000577				AASS,ADM2,AP1S2,APP,ASNS,BCAT1,CDKN1A,CTH,DDIT3,DDX60,DOCK10,DOCK5,EDNRB,EGF,ENG,EPHA7,EPRS,ETV5,F13A1,FAM135B,FUT1,FZD4,GNA14,GPD2,GRAMD1B,GRK5,GTPBP2,INPP4B,KCNAB3,LYVE1,MAPK4,MTHFD2,MYC,OR2T4,PCDH15,PCK2,PTPRG,RASGRF2,RCC2,SEL1L,SEMA3C,SESN2,SGIP1,SHC4,SLC1A4,SLC2A2,SLC35F1,SLC6A9,SLITRK6,SNTG1,SPARCL1,SPATS2,ST8SIA5,STARD5,SV2C,SYTL4,TMEM215,TRIB3,TRPM5,TSGA10,UST,VGF,XPOT,ZCCHC12	64
Cellular Movement	migration of cells	0.000585		1.895		ACTA2,APP,AREG,ASNS,BCAT1,CAMK1D,CD81,CDKN1A,DCX,DOCK10,DOCK5,EDNRB,EGF,EIF4EBP1,ENG,ETV5,F13A1,FZD4,GAD1,LYVE1,MYC,RCC2,S100A10,SEMA3C,SERPINF1,SHC4,SPARCL1,VGF,VSNL1	29
Cell Morphology, Cellular Function and Maintenance	transmembrane potential of mitochondria	0.000603		-0.77		APP,CDKN1A,DDIT3,EGF,GPD2,MYC,PYCR1	7
Tissue Morphology	density of macrophages	0.000603				APP,S100A10	2
Amino Acid Metabolism, Molecular Transport, Small Molecule Biochemistry	efflux of L-amino acid	0.000603				SLC1A5,SLC7A5	2
Amino Acid Metabolism, Post-Translational Modification, Small Molecule Biochemistry	modification of L-glutamic acid	0.000603				GAD1,PYCR1	2
Carbohydrate Metabolism	modulation of carbohydrate	0.000603				EGF,SLC2A2	2
Lipid Metabolism, Molecular Transport, Small Molecule Biochemistry	quantity of ganglioside GD3	0.000603				APP,PHGDH	2
Amino Acid Metabolism, Molecular Transport, Small Molecule Biochemistry	quantity of leucine	0.000603				BCAT1,EGF	2
Amino Acid Metabolism, Small Molecule Biochemistry	catabolism of amino acids	0.000606				AASS,BCAT1,GAD1,MYC	4
Cancer, Organismal Injury and Abnormalities	pelvic cancer	0.000615				AASS,ADM2,AP1S2,APP,ASNS,BCAT1,CDKN1A,CHAC1,CTH,DDIT3,DDX60,DOCK10,DOCK5,EDNRB,EGF,EIF4EBP1,ENG,EPHA7,EPRS,ETV5,F13A1,FAM135B,FUT1,FZD4,GNA14,GPD2,GRK5,GTPBP2,INPP4B,LYVE1,MAPK4,MTHFD2,MYC,OR2T4,PCDH15,PCK2,PSAT1,PTPRG,RASGRF2,RCC2,SEL1L,SEMA3C,SESN2,SGIP1,SHC4,SLC1A4,SLC2A2,SLC35F1,SLC6A9,SLC7A5,SLITRK6,SNTG1,SPARCL1,SPATS2,ST8SIA5,STARD5,SV2C,SYTL4,TMEM215,TRIB3,TRPM5,TSGA10,UST,VGF,XPOT,ZCCHC12	66
Cell Death and Survival	cell death of myeloid cells	0.000616		1.099		APP,C1QA,CDKN1A,DDIT3,MYC,SERPINF1,SLC7A11	7
Cellular Compromise, Cellular Function and Maintenance	endoplasmic reticulum stress response	0.000637				CTH,DDIT3,FAM129A,NNAT,SEL1L,TRIB3	6
Cell Death and Survival	apoptosis of fibroblasts	0.000659	Increased	2.39		APP,CDKN1A,DDIT3,EGF,ENG,MYC,NUPR1	7
Amino Acid Metabolism, Small Molecule Biochemistry	metabolism of L-amino acid	0.000673				AASS,CTH,GAD1,PHGDH	4
Cell Cycle	arrest in G2/M phase transition of tumor cell lines	0.000689				ATF5,CDKN1A,EGF	3
Cell Morphology, Cellular Function and Maintenance, Nervous System Development and Function, Tissue Morphology	length of dendrites	0.000689				APP,DCX,EPHA7	3
Cancer, Organismal Injury and Abnormalities	tumorigenesis of carcinoma	0.000707				AASS,ACTA2,ADM2,ALDH1A3,ALDH1L2,AP1S2,APP,ARL14EP,B3GNT9,BCAT1,CAMK1D,CDKN1A,CHAC1,CTH,DCX,DDIT3,DDX60,DOCK10,DOCK5,EDNRB,EGF,ENG,EPHA7,EPRS,ETV5,F13A1,FAM135B,FAM151A,FUT1,GAD1,GPD2,GRAMD1B,GRK5,GTPBP2,INPP4B,KCNAB3,KCNG3,MAPK4,MTHFD2,MYC,OR2T4,PCDH15,PHGDH,PTPRG,RASGRF2,RCC2,SEL1L,SEMA3C,SESN2,SGIP1,SLC1A4,SLC1A5,SLC2A2,SLC35F1,SLC6A9,SLC7A11,SLC7A3,SLC7A5,SLITRK6,SNTG1,SPARCL1,SPATS2,ST8SIA5,S…	73
Cancer, Organismal Injury and Abnormalities, Reproductive System Disease	tumorigenesis of genital organ	0.000714				AASS,AP1S2,APP,ASNS,BCAT1,CDKN1A,CHAC1,CTH,DCX,DDIT3,DDX60,DOCK10,DOCK5,EDNRB,EGF,EIF4EBP1,ENG,EPHA7,EPRS,ETV5,F13A1,FAM135B,FUT1,FZD4,GNA14,GPD2,GRK5,GTPBP2,INPP4B,LYVE1,MAPK4,MTHFD2,MYC,OR2T4,PCDH15,PCK2,PSAT1,PTPRG,RASGRF2,RCC2,SEL1L,SEMA3C,SESN2,SGIP1,SHC4,SLC1A4,SLC2A2,SLC35F1,SLC6A9,SLC7A3,SLC7A5,SLITRK6,SNTG1,SPARCL1,SPATS2,ST8SIA5,STARD5,SV2C,SYTL4,TMEM215,TRIB3,TRPM5,TSGA10,UST,ZCCHC12	65
Cancer, Organismal Injury and Abnormalities, Reproductive System Disease	genital tumor	0.000722				AASS,AP1S2,APP,ASNS,BCAT1,CDKN1A,CHAC1,CTH,DCX,DDIT3,DDX60,DOCK10,DOCK5,EDNRB,EGF,EIF4EBP1,ENG,EPHA7,EPRS,ETV5,F13A1,FAM135B,FUT1,FZD4,GNA14,GPD2,GRK5,GTPBP2,INPP4B,LYVE1,MAPK4,MTHFD2,MYC,OR2T4,PCDH15,PCK2,PSAT1,PTPRG,RASGRF2,RCC2,SEL1L,SEMA3C,SESN2,SGIP1,SHC4,SLC1A4,SLC2A2,SLC35F1,SLC6A9,SLC7A3,SLC7A5,SLITRK6,SNTG1,SPARCL1,SPATS2,ST8SIA5,STARD5,SV2C,SYTL4,TMEM215,TRIB3,TRPM5,TSGA10,UST,ZCCHC12	65
Cancer, Cell Death and Survival, Organismal Injury and Abnormalities, Tumor Morphology	apoptosis of mammary tumor cells	0.000755				DDIT3,EGF,MYC	3
Cell Cycle	arrest in interphase of brain cancer cell lines	0.000755				CDKN1A,DCX,MYC	3
Cancer, Organismal Injury and Abnormalities	non-melanoma solid tumor	0.000783		-0.217		AASS,ABTB2,ACTA2,ADM2,ALDH1A3,ALDH1L2,AP1S2,APP,AREG,ARL14EP,ASNS,ATF5,B3GNT9,BCAT1,CAMK1D,CD81,CDKN1A,CHAC1,CTH,CYP39A1,DCX,DDIT3,DDX60,DHRS4,DOCK10,DOCK5,EDNRB,EGF,EIF4EBP1,ENG,EPHA7,EPRS,ETV5,F13A1,FAM129A,FAM135B,FAM151A,FUT1,FZD4,GAD1,GNA14,GPD2,GPT2,GRAMD1B,GRK5,GTPBP2,HMGCS1,INPP4B,IZUMO1,KCNAB3,KCNG3,LANCL3,LMO1,LYVE1,MAPK4,MTHFD2,MYC,NRSN1,NUPR1,OR2T4,PCDH15,PCK2,PHGDH,PSAT1,PTPRG,RASGRF…	102
Cellular Development, Cellular Growth and Proliferation	arrest in growth of colorectal cancer cell lines	0.000801				CDKN1A,SLC7A5	2
Cellular Movement	cell movement of RPE cells	0.000801				EGF,MYC	2
Carbohydrate Metabolism	gluconeogenesis of hepatocytes	0.000801				CTH,PCK2	2
Hematological Disease	hyperhomocysteinemia	0.000801				APP,CTH	2
Connective Tissue Development and Function, Tissue Morphology	mass of parametrial fat pad	0.000801				CDKN1A,GPD2	2
Cardiovascular System Development and Function, Cell Morphology, Cellular Development, Organismal Development, Tissue Development	tubulation of endothelial cells	0.000856		0.762		APP,EDNRB,EGF,ENG,SERPINF1	5
Cancer, Organismal Injury and Abnormalities, Reproductive System Disease	female genital tract adenocarcinoma	0.000881				AASS,AP1S2,APP,BCAT1,CDKN1A,CTH,DDX60,DOCK10,DOCK5,EDNRB,EGF,ENG,EPHA7,EPRS,F13A1,FUT1,GRK5,GTPBP2,INPP4B,MAPK4,MTHFD2,PCDH15,PTPRG,RASGRF2,SEL1L,SEMA3C,SESN2,SGIP1,SLC2A2,SLC35F1,SLC7A5,SLITRK6,SNTG1,SPARCL1,SPATS2,ST8SIA5,STARD5,SV2C,TMEM215,TRIB3,TRPM5,ZCCHC12	42
Cellular Development, Nervous System Development and Function, Tissue Development	differentiation of neurons	0.000884		1.851		APP,AREG,ATF5,EGF,ETV5,MYC,PCDH15,PHGDH,SERPINF1,VGF	10
Cellular Movement, Hair and Skin Development and Function	migration of skin cell lines	0.000899				EGF,LYVE1,SERPINF1	3
Amino Acid Metabolism, Molecular Transport, Small Molecule Biochemistry	uptake of acidic amino acid	0.000899				APP,SERPINF1,SLC7A11	3
Nervous System Development and Function, Tissue Morphology	morphology of nervous tissue	0.00092				APP,C1QA,CD81,DCX,DOCK10,EPHA7,GAD1,MYC,PCDH15,SLITRK6,SPARCL1,TENM4	12
Cell Morphology, Cellular Function and Maintenance	autophagy of cells	0.000939		1.751		APP,CDKN1A,DDIT3,ENG,MYC,NUPR1,SESN2,TRIB3	8
Organismal Development	size of animal	0.000943		1.633	bias	CDKN1A,EIF4EBP1,F13A1,MTHFD2,MYC,PHGDH	6
Cellular Movement	cell movement	0.000946		1.534		ACTA2,APP,AREG,ASNS,BCAT1,Cald1,CAMK1D,CD81,CDKN1A,DCX,DOCK10,DOCK5,EDNRB,EGF,EIF4EBP1,ENG,ETV5,F13A1,FZD4,GAD1,LYVE1,MYC,PTPRG,RCC2,S100A10,SEMA3C,SERPINF1,SHC4,SPARCL1,VGF,VSNL1	31
Cell Death and Survival	apoptosis of connective tissue cells	0.000972		1.534		APP,ATF5,CDKN1A,DDIT3,EGF,ENG,MYC,NUPR1	8
Amino Acid Metabolism, Small Molecule Biochemistry	incorporation of amino acids	0.000977				CDKN1A,EGF,SLC7A3	3
Cell Cycle	re-entry into S phase	0.000977				CDKN1A,EGF,MYC	3
Carbohydrate Metabolism, Small Molecule Biochemistry	utilization of D-glucose	0.000977				APP,CTH,MYC	3
Cancer, Gastrointestinal Disease, Hepatic System Disease, Organismal Injury and Abnormalities	liver carcinoma	0.000978				AASS,ALDH1A3,AP1S2,AREG,ATF5,BCAT1,CAMK1D,CDKN1A,CYP39A1,DCX,DDIT3,DOCK10,EDNRB,EGF,ENG,EPHA7,EPRS,ETV5,GPD2,GPT2,GRAMD1B,HMGCS1,INPP4B,LANCL3,LMO1,LYVE1,MAPK4,MYC,NUPR1,PCDH15,PCK2,PTPRG,SEL1L,SEMA3C,SGIP1,SHC4,SLC1A4,SLC1A5,SLC2A2,SLC7A3,SLC7A5,SLITRK6,SMOC1,SNTG1,SPARCL1,STARD5,TMEM179,TRIM66,TRPM5,ZCCHC12	50
Cancer, Organismal Injury and Abnormalities, Reproductive System Disease	female genital tract cancer	0.000987				AASS,AP1S2,APP,BCAT1,CDKN1A,CTH,DDX60,DOCK10,DOCK5,EDNRB,EGF,ENG,EPHA7,EPRS,ETV5,F13A1,FUT1,GRK5,GTPBP2,INPP4B,MAPK4,MTHFD2,MYC,PCDH15,PCK2,PSAT1,PTPRG,RASGRF2,SEL1L,SEMA3C,SESN2,SGIP1,SLC2A2,SLC35F1,SLC7A5,SLITRK6,SNTG1,SPARCL1,SPATS2,ST8SIA5,STARD5,SV2C,TMEM215,TRIB3,TRPM5,ZCCHC12	46
Cancer, Organismal Injury and Abnormalities, Reproductive System Disease	HER2 negative hormone receptor negative breast cancer	0.00102				AREG,CDKN1A,EGF,LMO1,MYC,PTPRG	6
Cancer, Organismal Injury and Abnormalities, Reproductive System Disease	tumorigenesis of genital tumor	0.00102				AASS,AP1S2,APP,BCAT1,CDKN1A,CTH,DDX60,DOCK10,DOCK5,EGF,ENG,EPHA7,EPRS,ETV5,F13A1,FUT1,GRK5,GTPBP2,INPP4B,MAPK4,MTHFD2,PCDH15,PTPRG,RASGRF2,SEL1L,SEMA3C,SESN2,SGIP1,SLC2A2,SLC35F1,SLITRK6,SNTG1,SPARCL1,SPATS2,ST8SIA5,STARD5,SV2C,TMEM215,TRIB3,TRPM5,ZCCHC12	41
Cellular Development, Cellular Growth and Proliferation	cell proliferation of colorectal cancer cell lines	0.00102		1.519		APP,AREG,CDKN1A,EGF,GRK5,MYC,SLC7A5,SPARCL1	8
Cell Cycle	arrest in G2 phase of epithelial cells	0.00103				CDKN1A,MYC	2
Nervous System Development and Function	gliogenesis	0.00103				APP,EGF	2
Cellular Compromise, Neurological Disease, Organismal Injury and Abnormalities, Psychological Disorders	injury of cerebral cortex cells	0.00103				APP,DDIT3	2
Hair and Skin Development and Function, Organ Morphology	quantity of hair	0.00103				CDKN1A,MYC	2
Nervous System Development and Function	regeneration of central nervous system	0.00103				EGF,SERPINF1	2
Amino Acid Metabolism, Small Molecule Biochemistry	synthesis of L-proline	0.00103				MYC,PYCR1	2
Amino Acid Metabolism, Molecular Transport, Small Molecule Biochemistry	transport of L-serine	0.00103				SLC1A4,SLC1A5	2
Cancer, Organismal Injury and Abnormalities	tumorigenesis of fibrosarcoma	0.00103				CDKN1A,SLC7A11	2
Auditory and Vestibular System Development and Function, Embryonic Development, Organ Development, Organismal Development, Tissue Development	development of ear	0.00104				ALDH1A3,AP1S2,FZD4,MYC,PCDH15,SLITRK6	6
Cancer, Organismal Injury and Abnormalities	adenocarcinoma	0.00107				AASS,ABTB2,ACTA2,ADM2,ALDH1A3,ALDH1L2,AP1S2,APP,AREG,ARL14EP,ASNS,ATF5,B3GNT9,BCAT1,CAMK1D,CDKN1A,CHAC1,CTH,DCX,DDIT3,DDX60,DOCK10,DOCK5,EDNRB,EGF,ENG,EPHA7,EPRS,ETV5,F13A1,FAM129A,FAM135B,FAM151A,FUT1,FZD4,GAD1,GNA14,GPD2,GPT2,GRAMD1B,GRK5,GTPBP2,HMGCS1,INPP4B,IZUMO1,KCNAB3,KCNG3,LANCL3,LYVE1,MAPK4,MTHFD2,MYC,NRSN1,OR2T4,PCDH15,PCK2,PHGDH,PTPRG,RASGRF2,RCC2,SEL1L,SEMA3C,SERPINF1,SESN2,SGIP1,SHC4…	93
Gastrointestinal Disease, Hepatic System Disease, Organismal Injury and Abnormalities	liver lesion	0.00113		-0.062		AASS,ACTA2,ALDH1A3,AP1S2,AREG,ATF5,BCAT1,CAMK1D,CDKN1A,CTH,CYP39A1,DCX,DDIT3,DOCK10,EDNRB,EGF,ENG,EPHA7,EPRS,ETV5,GPD2,GPT2,GRAMD1B,HMGCS1,INPP4B,LANCL3,LMO1,LYVE1,MAPK4,MYC,NUPR1,PCDH15,PCK2,PHGDH,PTPRG,SEL1L,SEMA3C,SGIP1,SHC4,SLC1A4,SLC1A5,SLC2A2,SLC7A11,SLC7A3,SLC7A5,SLITRK6,SMOC1,SNTG1,SPARCL1,STARD5,TMEM179,TRIM66,TRPM5,ZCCHC12	54
Cell Morphology, Cellular Function and Maintenance, Nervous System Development and Function, Tissue Morphology	length of neurites	0.00114				APP,DCX,EPHA7,TENM4	4
Cancer, Organismal Injury and Abnormalities	metastatic potential	0.00114		-0.069		ACTA2,CD81,CDKN1A,ENG	4
Cellular Development	differentiation of exocrine cells	0.00115				CDKN1A,EGF,MYC	3
Embryonic Development, Organ Development, Organismal Development, Tissue Development	development of sensory organ	0.00115				ALDH1A3,AP1S2,AREG,CDKN1A,EGF,FZD4,LYVE1,MYC,PCDH15,SERPINF1,SLITRK6,SMOC1	12
Cancer, Gastrointestinal Disease, Organismal Injury and Abnormalities	upper gastrointestinal tract cancer	0.0012				ATF5,CDKN1A,DOCK10,DOCK5,EDNRB,ENG,EPHA7,F13A1,FAM135B,FZD4,GAD1,GPD2,INPP4B,KCNAB3,MYC,OR2T4,PCDH15,PHGDH,PTPRG,RASGRF2,SEL1L,SGIP1,SHC4,SLC1A5,SLITRK6,SNTG1,SV2C,VGF,XPOT	29
Cancer, Organismal Injury and Abnormalities	carcinoma	0.00123		-0.656		AASS,ABTB2,ACTA2,ADM2,ALDH1A3,ALDH1L2,AP1S2,APP,AREG,ARL14EP,ASNS,ATF5,B3GNT9,BCAT1,CAMK1D,CD81,CDKN1A,CHAC1,CTH,CYP39A1,DCX,DDIT3,DDX60,DHRS4,DOCK10,DOCK5,EDNRB,EGF,ENG,EPHA7,EPRS,ETV5,F13A1,FAM129A,FAM135B,FAM151A,FUT1,FZD4,GAD1,GNA14,GPD2,GPT2,GRAMD1B,GRK5,GTPBP2,HMGCS1,INPP4B,IZUMO1,KCNAB3,KCNG3,LANCL3,LMO1,LYVE1,MAPK4,MTHFD2,MYC,NRSN1,NUPR1,OR2T4,PCDH15,PCK2,PHGDH,PTPRG,RASGRF2,RCC2,S100A10,…	100
Cancer, Gastrointestinal Disease, Hepatic System Disease, Organismal Injury and Abnormalities	liver cancer	0.00126				AASS,ALDH1A3,AP1S2,AREG,ATF5,BCAT1,CAMK1D,CDKN1A,CYP39A1,DCX,DDIT3,DOCK10,EDNRB,EGF,ENG,EPHA7,EPRS,ETV5,GPD2,GPT2,GRAMD1B,HMGCS1,INPP4B,LANCL3,LMO1,LYVE1,MAPK4,MYC,NUPR1,PCDH15,PCK2,PHGDH,PTPRG,SEL1L,SEMA3C,SGIP1,SHC4,SLC1A4,SLC1A5,SLC2A2,SLC7A3,SLC7A5,SLITRK6,SMOC1,SNTG1,SPARCL1,STARD5,TMEM179,TRIM66,TRPM5,ZCCHC12	51
Cellular Development, Connective Tissue Development and Function, Tissue Development	differentiation of osteoprogenitor cells	0.00128				AREG,SERPINF1	2
Cancer, Connective Tissue Disorders, Organismal Injury and Abnormalities, Skeletal and Muscular Disorders	hyperplasia of synovial membrane	0.00128				F13A1,MYC	2
Cell-To-Cell Signaling and Interaction, Cellular Assembly and Organization, Nervous System Development and Function	induction of neurites	0.00128				EGF,SERPINF1	2
Hair and Skin Development and Function, Organ Morphology, Tissue Morphology	quantity of keratinocytes	0.00128				CDKN1A,EGF	2
Molecular Transport	transport of molecule	0.00128		1.492		AP1S2,APP,EGF,FZD4,KCNAB3,KCNG3,MYC,NNAT,SEL1L,SERPINF1,SESN2,SLC1A4,SLC1A5,SLC2A2,SLC6A9,SLC7A11,SLC7A3,SLC7A5,STARD5,SYTL4,TRIB3,TRPM5,VSNL1,XPOT	24
Cell Death and Survival	cell death of ovarian cancer cell lines	0.00129		0.068		CDKN1A,DDIT3,ENG,MYC,SLC7A11	5
Cell Morphology, Tissue Morphology	morphology of epithelial cells	0.00129				APP,AREG,CDKN1A,EDNRB,EGF,MYC,RASGRF2	7
Amino Acid Metabolism, Small Molecule Biochemistry	metabolism of glutamine family amino acid	0.00133				GAD1,MYC,PHGDH	3
Cellular Development	differentiation of nervous system	0.00134		1.741		APP,AREG,ATF5,EGF,ETV5,MYC,PCDH15,PHGDH,SERPINF1,TENM4,VGF	11
Cancer, Organismal Injury and Abnormalities, Reproductive System Disease	genital tract cancer	0.00135				AASS,AP1S2,APP,ASNS,BCAT1,CDKN1A,CHAC1,CTH,DDIT3,DDX60,DOCK10,DOCK5,EDNRB,EGF,EIF4EBP1,ENG,EPHA7,EPRS,ETV5,F13A1,FAM135B,FUT1,FZD4,GNA14,GPD2,GRK5,GTPBP2,INPP4B,LYVE1,MAPK4,MTHFD2,MYC,OR2T4,PCDH15,PCK2,PSAT1,PTPRG,RASGRF2,RCC2,SEL1L,SEMA3C,SESN2,SGIP1,SHC4,SLC1A4,SLC2A2,SLC35F1,SLC6A9,SLC7A5,SLITRK6,SNTG1,SPARCL1,SPATS2,ST8SIA5,STARD5,SV2C,SYTL4,TMEM215,TRIB3,TRPM5,TSGA10,UST,ZCCHC12	63
Cell Cycle, Connective Tissue Development and Function	cell cycle progression of fibroblast cell lines	0.00135				APP,CDKN1A,EGF,MYC	4
Cancer, Organismal Injury and Abnormalities	abdominal adenocarcinoma	0.00136				AASS,ABTB2,ADM2,ALDH1A3,ALDH1L2,AP1S2,APP,AREG,ARL14EP,B3GNT9,BCAT1,CAMK1D,CDKN1A,CHAC1,CTH,DCX,DDIT3,DDX60,DOCK10,DOCK5,EDNRB,EGF,ENG,EPHA7,EPRS,ETV5,F13A1,FAM135B,FAM151A,FUT1,GAD1,GPD2,GRAMD1B,GRK5,GTPBP2,HMGCS1,INPP4B,KCNAB3,KCNG3,MAPK4,MTHFD2,MYC,OR2T4,PCDH15,PHGDH,PTPRG,RASGRF2,RCC2,SEL1L,SEMA3C,SESN2,SGIP1,SLC1A4,SLC1A5,SLC2A2,SLC35F1,SLC6A9,SLC7A11,SLC7A3,SLC7A5,SLITRK6,SNTG1,SPARCL1,SPAT…	75
Cell Death and Survival, Organismal Injury and Abnormalities	apoptosis of endothelial cells	0.00138		1.963		APP,CDKN1A,DDIT3,EGF,MYC,SERPINF1	6
Amino Acid Metabolism, Molecular Transport, Small Molecule Biochemistry	uptake of glutamine family amino acid	0.00143				SERPINF1,SLC1A5,SLC7A11	3
Cell Death and Survival	apoptosis of myeloid cells	0.00145		1.072		APP,C1QA,CDKN1A,DDIT3,MYC,SERPINF1	6
Drug Metabolism, Molecular Transport, Small Molecule Biochemistry	concentration of glutathione	0.00147		-0.803		APP,CD81,DDIT3,MYC	4
Cancer, Hematological Disease, Organismal Injury and Abnormalities	B-cell malignant tumor	0.00151				ALDH1L2,APP,CDKN1A,EGF,EIF4EBP1,GPD2,GTPBP2,KCNAB3,MYC,PCDH15,S100A10,SMOC1,STARD5	13
Tissue Morphology	quantity of stem cells	0.00153				APP,CDKN1A,EDNRB,MYC	4
Cell Cycle, Connective Tissue Development and Function	arrest in G1 phase of fibroblast cell lines	0.00153				CDKN1A,EGF,MYC	3
Cellular Development	differentiation of central nervous system cells	0.00154		0.832		APP,ATF5,EGF,ETV5,SERPINF1	5
Cell Cycle	G1 phase of hepatoma cell lines	0.00156				CDKN1A,DDIT3	2
Cell Cycle, Renal and Urological System Development and Function	S phase of kidney cell lines	0.00156				EGF,MYC	2
Cell Cycle	cell cycle progression of ovarian cancer cell lines	0.00156				EGF,MYC	2
Amino Acid Metabolism, Molecular Transport, Small Molecule Biochemistry	concentration of creatine	0.00156				APP,EGF	2
Cardiovascular System Development and Function, Tissue Morphology	contraction of aorta	0.00156				EDNRB,EGF	2
Cardiovascular Disease, Organismal Injury and Abnormalities	degeneration of vasculature	0.00156				APP,MYC	2
Cellular Function and Maintenance	endocytosis by fibroblast cell lines	0.00156				EGF,SGIP1	2
Cellular Development, Cellular Growth and Proliferation, Organ Development, Reproductive System Development and Function, Tissue Development, Tissue Morphology	expansion of cumulus cells	0.00156				AREG,EGF	2
Cell Cycle	interphase of skin cell lines	0.00156				EGF,MYC	2
Cardiovascular System Development and Function, Tissue Morphology	quantity of endothelial cell lines	0.00156				EGF,MYC	2
Organ Morphology, Renal and Urological System Development and Function, Tissue Morphology	quantity of glomerular cells	0.00156				CDKN1A,EGF	2
Cell Death and Survival, Visual System Development and Function	survival of photoreceptors	0.00156				EGF,SERPINF1	2
Amino Acid Metabolism, Lipid Metabolism, Small Molecule Biochemistry	synthesis of GABA	0.00156				EGF,GAD1	2
Cardiovascular System Development and Function, Organismal Development, Tissue Morphology	vasodilation of aortic ring tissue	0.00156				APP,CTH	2
Cardiovascular System Development and Function	development of vasculature	0.00163		0.982		ACTA2,ADM2,AP1S2,APP,AREG,C1QA,CD81,CDKN1A,CTH,DDIT3,EDNRB,EGF,ENG,FZD4,INPP4B,MYC,SEMA3C,SERPINF1	18
Cancer, Cellular Development, Organismal Injury and Abnormalities, Tumor Morphology	differentiation of tumor cells	0.00166				CDKN1A,EGF,MYC,SERPINF1	4
Behavior, Nervous System Development and Function	startle response	0.00173				EGF,PCDH15,PTPRG,SLITRK6	4
Post-Translational Modification	phosphorylation of protein	0.00173		1.094		ADM2,APP,AREG,CD81,CDKN1A,EDNRB,EGF,ENG,EPHA7,FAM129A,GRK5,MAPK4,SESN2	13
Cancer, Cell-To-Cell Signaling and Interaction, Inflammatory Response	cytotoxic reaction of tumor cell lines	0.00176				CDKN1A,EIF4EBP1,MYC	3
Cellular Growth and Proliferation, Connective Tissue Development and Function, Tissue Development	proliferation of synovial cells	0.00176				AREG,CDKN1A,MYC	3
Cancer, Organismal Injury and Abnormalities	endometrioid carcinoma	0.00176				AASS,AP1S2,APP,BCAT1,CTH,DDX60,DOCK10,DOCK5,EGF,ENG,EPHA7,EPRS,F13A1,FUT1,GRK5,GTPBP2,INPP4B,MAPK4,MTHFD2,PCDH15,PTPRG,RASGRF2,SEL1L,SEMA3C,SESN2,SGIP1,SLC2A2,SLC35F1,SLITRK6,SPARCL1,SPATS2,ST8SIA5,STARD5,SV2C,TMEM215,TRIB3,TRPM5,ZCCHC12	38
Post-Translational Modification, Protein Synthesis, Protein Trafficking	tetramerization of protein	0.00177				AASS,ALDH1A3,CTH,DHRS4,S100A10	5
Cell Death and Survival, Organismal Injury and Abnormalities	apoptosis of dermal cells	0.0018		-0.277		CDKN1A,EGF,ENG,MYC	4
Cell Cycle	arrest in interphase of hepatoma cell lines	0.00186				ATF5,DDIT3	2
Neurological Disease, Organismal Injury and Abnormalities	astrocytosis of hippocampus	0.00186				APP,GRK5	2
Cellular Development	differentiation of colorectal cancer cell lines	0.00186				CDKN1A,SPARCL1	2
Nervous System Development and Function	protection of cortical neurons	0.00186				APP,DDIT3	2
Cellular Development, Cellular Growth and Proliferation, Embryonic Development, Nervous System Development and Function, Organismal Development, Tissue Morphology	quantity of neuroblasts	0.00186				APP,SERPINF1	2
Cell-To-Cell Signaling and Interaction, Cellular Growth and Proliferation, Connective Tissue Development and Function	stimulation of fibroblast cell lines	0.00186				EGF,MYC	2
Amino Acid Metabolism, Molecular Transport, Small Molecule Biochemistry	uptake of neutral amino acid	0.00186				SLC6A9,SLC7A5	2
Hematological Disease, Metabolic Disease	dysglycemia	0.00187		1.254	bias	DDIT3,EIF4EBP1,GPD2,MYC,SEL1L,SLC2A2,TRIB3	7
Carbohydrate Metabolism, Cellular Function and Maintenance, Molecular Transport, Small Molecule Biochemistry	transport of D-glucose	0.00187				EGF,MYC,SESN2,SLC2A2,TRIB3	5
Nervous System Development and Function	morphology of nervous system	0.00191				APP,C1QA,CD81,CDKN1A,DCX,DDIT3,DOCK10,EPHA7,GAD1,MYC,PCDH15,PHGDH,SLITRK6,SPARCL1,SYTL4,TENM4	16
Cellular Assembly and Organization	formation of cytoskeleton	0.00192		-0.555		APP,Cald1,CDKN1A,DCX,DOCK5,EGF,MYC,S100A10,SERPINF1	9
Organismal Development	morphology of head	0.00192				ALDH1A3,APP,AREG,C1QA,CD81,CDKN1A,DCX,DDIT3,EDNRB,EGF,EPHA7,GAD1,PCDH15,PHGDH,SLITRK6,SPARCL1,SYTL4	17
Cellular Movement	invasion of pancreatic cancer cell lines	0.002				AREG,EGF,SEL1L	3
Cellular Movement	migration of carcinoma cell lines	0.00205		1.095		ACTA2,AREG,ASNS,EGF,S100A10,VSNL1	6
Cellular Movement	invasion of cells	0.00205		0.686		ACTA2,APP,AREG,BCAT1,CD81,CDKN1A,EDNRB,EGF,ENG,ETV5,MYC,RASGRF2,S100A10,SEL1L,SLC7A11,SPARCL1	16
Cellular Assembly and Organization, Cellular Function and Maintenance, Tissue Development	formation of microtubules	0.00209		0.305		APP,DCX,DOCK5,SERPINF1	4
Developmental Disorder, Ophthalmic Disease, Organismal Injury and Abnormalities	microphthalmia	0.00209				ALDH1A3,AREG,EGF,SMOC1	4
Cellular Development, Connective Tissue Development and Function, Tissue Development	differentiation of adipocytes	0.00211				AP1S2,ATF5,DDIT3,GRK5,MYC,SERPINF1,TRIB3	7
Cancer, Organismal Injury and Abnormalities	growth of carcinoma	0.00214		0.057		AREG,DDIT3,EGF,MYC,S100A10	5
Cellular Development, Cellular Growth and Proliferation, Tissue Development	development of stem cells	0.00217		1.975		APP,EGF,ENG,MYC	4
Embryonic Development, Organismal Development	development of head	0.00218		0.577		ALDH1A3,AP1S2,APP,AREG,CDKN1A,DCX,EGF,EPHA7,FZD4,GAD1,LYVE1,MYC,PCDH15,PHGDH,SERPINF1,SLITRK6,SMOC1	17
Behavior	active avoidance response	0.00219				APP,EGF	2
Cell Cycle	entry into S phase of muscle cells	0.00219				CDKN1A,MYC	2
Carbohydrate Metabolism	glycogenolysis	0.00219				CTH,EGF	2
Amino Acid Metabolism, Small Molecule Biochemistry	synthesis of serine family amino acid	0.00219				CTH,PHGDH	2
Cell Morphology	contraction of cells	0.00225		1.067		ACTA2,Cald1,EDNRB,EGF	4
Cardiovascular System Development and Function, Organismal Development	growth of blood vessel	0.00225				EDNRB,EGF,MYC,SERPINF1	4
Cellular Movement, Hematological System Development and Function, Immune Cell Trafficking, Inflammatory Response	migration of macrophages	0.00225				APP,EGF,ENG,S100A10	4
Carbohydrate Metabolism	accumulation of carbohydrate	0.00225				APP,EDNRB,EGF,GNA14,GRK5	5
Nervous System Development and Function	activation of brain	0.00226				APP,CDKN1A,SLC6A9	3
Cellular Development	differentiation of stem cells	0.0023	Increased	2.183		APP,CDKN1A,EGF,ENG,MYC,SERPINF1,SHC4	7
Cell Signaling, Molecular Transport, Vitamin and Mineral Metabolism	quantity of Ca2+	0.0023		1.563		APP,EDNRB,EGF,GNA14,GRK5,MYC,NNAT,TRPM5,VGF	9
Cellular Movement, Connective Tissue Development and Function	migration of fibroblasts	0.00237		0.063		CDKN1A,EGF,ENG,MYC,SERPINF1	5
Cellular Movement	transmigration of tumor cell lines	0.0024				ACTA2,APP,ENG	3
Organismal Development	size of body	0.0024		1.753	bias	APP,AREG,CD81,CDKN1A,EDNRB,EGF,EIF4EBP1,ETV5,GPD2,MYC,SLC2A2,SLC6A9,SLITRK6,SYTL4,VGF	15
Cell Morphology, Nervous System Development and Function, Tissue Morphology	morphology of neurons	0.00242				APP,C1QA,CD81,DCX,DOCK10,EPHA7,GAD1,PCDH15,SLITRK6,SPARCL1,TENM4	11
Cardiovascular System Development and Function, Organismal Development	vasculogenesis	0.00247		0.335		AP1S2,APP,C1QA,CDKN1A,CTH,DDIT3,EDNRB,EGF,ENG,FZD4,INPP4B,MYC,SEMA3C,SERPINF1	14
Developmental Disorder, Ophthalmic Disease, Organismal Injury and Abnormalities	congenital anomaly of eye	0.00251				ACTA2,ALDH1A3,AREG,EGF,FZD4,SMOC1	6
Cellular Movement	migration of cerebral cortex cells	0.00254				APP,DCX,EGF	3
Cell Cycle	arrest in G2 phase of brain cancer cell lines	0.00255				CDKN1A,DCX	2
Cell Death and Survival, Organismal Injury and Abnormalities	cell death of melanocytes	0.00255				APP,CDKN1A	2
Cellular Movement	cell movement of prostate cell lines	0.00255				EGF,ENG	2
Cell Cycle	exit from G1 phase	0.00255				EGF,MYC	2
Cancer, Organismal Injury and Abnormalities	growth of fibrosarcoma	0.00255				MYC,S100A10	2
Cancer, Endocrine System Disorders, Organismal Injury and Abnormalities	growth of neuroendocrine tumor	0.00255				EGF,ENG	2
Embryonic Development, Tissue Morphology	quantity of neural stem cells	0.00255				APP,EDNRB	2
Amino Acid Metabolism, Molecular Transport, Small Molecule Biochemistry	transport of sulfur amino acid	0.00255				SLC1A4,SLC6A9	2
Protein Trafficking	interaction of protein	0.00258				AASS,ALDH1A3,CTH,DHRS4,EGF,MYC,S100A10	7
Cardiovascular System Development and Function, Organismal Development	angiogenesis	0.00264		0.982		ADM2,AP1S2,APP,AREG,C1QA,CDKN1A,CTH,DDIT3,EDNRB,EGF,ENG,FZD4,INPP4B,MYC,SEMA3C,SERPINF1	16
Amino Acid Metabolism, Molecular Transport, Small Molecule Biochemistry	transport of glutamine family amino acid	0.00269				SLC1A4,SLC1A5,SLC7A3	3
Cellular Development, Cellular Growth and Proliferation	proliferation of stem cells	0.00271		1.443		APP,CDKN1A,EGF,MYC,SEL1L,SERPINF1	6
Cell Death and Survival	killing of tumor cell lines	0.00277				CDKN1A,EGF,MYC,SERPINF1	4
Embryonic Development, Nervous System Development and Function, Organ Development, Organismal Development, Tissue Development, Visual System Development and Function	development of cornea	0.00284				ALDH1A3,EGF,LYVE1	3
Cancer, Organismal Injury and Abnormalities	melanoma	0.00291				ABTB2,ALDH1L2,APP,AREG,ARL14EP,ASNS,ATF5,BCAT1,C1QA,CAMK1D,CD81,CHAC1,CYP39A1,DCX,DDX60,DOCK10,DOCK5,EDNRB,EGF,EIF4EBP1,ENG,EPHA7,EPRS,F13A1,FAM129A,FAM135B,FAM151A,FUT1,FZD4,GAD1,GNA14,GRAMD1B,GRK5,GTPBP2,INPP4B,IZUMO1,KCNG3,MAPK4,MYC,NRSN1,OR2T4,PCDH15,PHGDH,PTPRG,PYCR1,RASGRF2,SEL1L,SEMA3C,SERPINF1,SESN2,SGIP1,SHC4,SLC1A4,SLC1A5,SLC2A2,SLC35F1,SLC6A9,SLC7A11,SLC7A3,SLC7A5,SLITRK6,SMOC1,SNTG1,S…	73
Amino Acid Metabolism, Small Molecule Biochemistry	accumulation of amino acids	0.00293				MYC,SLC6A9	2
Amino Acid Metabolism, Small Molecule Biochemistry	catabolism of glutamine family amino acid	0.00293				GAD1,MYC	2
Amino Acid Metabolism, Post-Translational Modification, Small Molecule Biochemistry	conversion of L-amino acid	0.00293				ASNS,PYCR1	2
Cell Cycle	delay in initiation of G2 phase	0.00293				Cald1,CDKN1A	2
Amino Acid Metabolism, Small Molecule Biochemistry	incorporation of leucine	0.00293				CDKN1A,EGF	2
Visual System Development and Function	metabolism by retina	0.00293				ALDH1A3,DHRS4	2
Cardiovascular Disease, Hereditary Disorder, Organismal Injury and Abnormalities, Respiratory Disease	primary pulmonary hypertension 1	0.00293				EDNRB,ENG	2
Cellular Development, Cellular Growth and Proliferation	proliferation of germ cell tumor cell lines	0.00293				CDKN1A,MYC	2
Cancer, Cell Cycle, Organismal Injury and Abnormalities, Tumor Morphology	senescence of tumor cells	0.00293				CDKN1A,MYC	2
Behavior	locomotion	0.00298				ALDH1A3,APP,EGF,ETV5,FZD4,PCDH15,SLITRK6,VGF	8
Cell Death and Survival	cell death of lung cancer cell lines	0.00312		0.939		AREG,CDKN1A,DDIT3,EGF,MYC,SERPINF1,SLC7A11	7
Amino Acid Metabolism	quantity of L-amino acid	0.00316				APP,PHGDH,SLC7A11	3
Inflammatory Response	cytotoxic reaction of cells	0.00327		-0.52		APP,CDKN1A,EIF4EBP1,MYC	4
Cell Cycle	G1/S phase transition	0.00328				BCAT1,CDKN1A,DDIT3,EGF,EIF4EBP1,MYC	6
Cell Death and Survival, Skeletal and Muscular Disorders	apoptosis of smooth muscle cell lines	0.00334				CDKN1A,MYC	2
Cell Cycle	arrest in G1 phase of lymphoma cell lines	0.00334				CDKN1A,MYC	2
Cell Morphology	morphology of lymphoma cell lines	0.00334				CDKN1A,MYC	2
Cellular Movement	transmigration of leukemia cell lines	0.00334				APP,ENG	2
Cellular Function and Maintenance	vesiculation	0.00334				CDKN1A,EGF	2
Cell Death and Survival, Hair and Skin Development and Function	cell viability of epithelial cell lines	0.00337		-1.131		APP,DDIT3,EGF,MYC	4
Cellular Movement, Reproductive System Development and Function	cell movement of breast cell lines	0.00348		0.191		APP,EGF,EIF4EBP1,PTPRG	4
Cellular Movement	invasion of tumor cell lines	0.00348		0.764		ACTA2,APP,AREG,CD81,CDKN1A,EGF,ETV5,MYC,RASGRF2,S100A10,SEL1L,SLC7A11,SPARCL1	13
Cancer, Gastrointestinal Disease, Organismal Injury and Abnormalities	gastrointestinal adenocarcinoma	0.0035				AASS,ADM2,ALDH1A3,ALDH1L2,ARL14EP,B3GNT9,CAMK1D,CHAC1,DCX,DDIT3,DDX60,DOCK10,DOCK5,EDNRB,EGF,ENG,EPHA7,ETV5,F13A1,FAM135B,FAM151A,GAD1,GPD2,GRK5,INPP4B,KCNAB3,KCNG3,MAPK4,MYC,OR2T4,PCDH15,PHGDH,PTPRG,RASGRF2,RCC2,SEL1L,SGIP1,SHC4,SLC1A4,SLC1A5,SLC2A2,SLC35F1,SLC6A9,SLC7A11,SLC7A3,SLC7A5,SLITRK6,SNTG1,SPARCL1,SV2C,TSGA10,UST,VGF,XPOT	54
Cellular Development, Cellular Growth and Proliferation, Hair and Skin Development and Function	proliferation of skin cell lines	0.00351				AREG,EGF,ENG	3
Cancer, Gastrointestinal Disease, Organismal Injury and Abnormalities	esophageal cancer	0.00354				ATF5,CDKN1A,ENG,EPHA7,FZD4,INPP4B,MYC,OR2T4,PTPRG,SGIP1,SHC4	11
Cell Death and Survival, Gastrointestinal Disease, Hepatic System Disease, Organismal Injury and Abnormalities	cell death of hepatocytes	0.00365		-0.356		CDKN1A,CTH,DDIT3,EGF,MYC	5
Metabolic Disease	glucose metabolism disorder	0.00366		0.159		ACTA2,APP,C1QA,CDKN1A,CTH,DDIT3,DDX60,EDNRB,EIF4EBP1,GPD2,KCNAB3,MYC,NRSN1,PCDH15,S100A10,SEL1L,SERPINF1,SLC2A2,SLC7A11,TRIB3	20
Cell Cycle	re-entry into cell cycle progression	0.00369				APP,CDKN1A,MYC	3
Organismal Development	growth of multicellular organism	0.0037				ATF5,GPD2,PCDH15,SLITRK6	4
Cell Death and Survival, Organismal Injury and Abnormalities	cell death of epithelial cells	0.00371		0.713		APP,CDKN1A,CTH,DDIT3,EGF,ENG,MYC,SEL1L,SERPINF1,TRIB3	10
Cellular Assembly and Organization	activation of mitochondria	0.00377				APP,MYC	2
Cell Death and Survival	apoptosis of eye cell lines	0.00377				DDIT3,SERPINF1	2
Cell Cycle, Connective Tissue Development and Function	arrest in G2 phase of fibroblasts	0.00377				CDKN1A,MYC	2
Cardiovascular Disease, Metabolic Disease, Neurological Disease, Organismal Injury and Abnormalities, Psychological Disorders	cerebral amyloid angiopathy	0.00377				ACTA2,APP	2
Cell Death and Survival	condensation of cells	0.00377				APP,EPHA7	2
Cellular Development, Cellular Growth and Proliferation, Embryonic Development, Organismal Development, Tissue Development	development of neural stem cells	0.00377				APP,EGF	2
Cellular Assembly and Organization, Cellular Compromise, Cellular Function and Maintenance	disruption of microtubules	0.00377				APP,EGF	2
Cancer, Organismal Injury and Abnormalities, Tissue Morphology, Tumor Morphology	mass of tumor	0.00377				ENG,MYC	2
Nervous System Development and Function	morphology of central nervous system	0.00379				APP,C1QA,CD81,CDKN1A,DCX,DDIT3,EPHA7,MYC,PHGDH,SPARCL1,SYTL4	11
Auditory Disease, Neurological Disease	hearing loss	0.00379				EDNRB,FZD4,PCDH15,SERPINF1,SLC7A11,SLITRK6	6
Organismal Functions	hypoactivity of mice	0.00382				APP,CD81,GRK5,SLITRK6,SV2C	5
Inflammatory Response	inflammatory response of cells	0.00387				APP,ENG,SLC1A5	3
Cellular Development, Connective Tissue Development and Function, Tissue Development	differentiation of connective tissue cells	0.00389		0.038		AP1S2,AREG,ATF5,CDKN1A,DDIT3,GRK5,INPP4B,MYC,SERPINF1,SLC1A5,SMOC1,TRIB3	12
Cancer, Gastrointestinal Disease, Organismal Injury and Abnormalities	gastrointestinal carcinoma	0.00391				AASS,ABTB2,ACTA2,ADM2,ALDH1A3,ALDH1L2,APP,ARL14EP,ATF5,B3GNT9,BCAT1,CAMK1D,CHAC1,DCX,DDIT3,DDX60,DOCK10,DOCK5,EDNRB,EGF,ENG,EPHA7,EPRS,ETV5,F13A1,FAM129A,FAM135B,FAM151A,FUT1,FZD4,GAD1,GPD2,GPT2,GRAMD1B,GRK5,GTPBP2,HMGCS1,INPP4B,IZUMO1,KCNAB3,KCNG3,LANCL3,MAPK4,MYC,NRSN1,OR2T4,PCDH15,PHGDH,PTPRG,RASGRF2,RCC2,SEL1L,SEMA3C,SESN2,SGIP1,SHC4,SLC1A4,SLC1A5,SLC2A2,SLC35F1,SLC6A9,SLC7A11,SLC7A3,SLC7A5,S…	79
Amino Acid Metabolism	abnormal quantity of amino acids	0.00406				CTH,GPD2,SLC7A11	3
Cell-To-Cell Signaling and Interaction, Renal and Urological System Development and Function	response of kidney cell lines	0.00406				C1QA,OTUB2,TRIM66	3
Cancer, Gastrointestinal Disease, Organismal Injury and Abnormalities	upper gastrointestinal tract tumor	0.00409				ATF5,CDKN1A,DOCK10,DOCK5,EDNRB,ENG,EPHA7,F13A1,FAM135B,FAM151A,FZD4,GAD1,GPD2,GRK5,INPP4B,KCNAB3,MYC,OR2T4,PCDH15,PHGDH,PTPRG,RASGRF2,SEL1L,SGIP1,SHC4,SLC1A5,SLC6A9,SLC7A11,SLITRK6,SNTG1,SV2C,TRIM66,VGF,XPOT	34
Cancer, Dermatological Diseases and Conditions, Organismal Injury and Abnormalities	skin cancer	0.0042				ABTB2,ALDH1L2,APP,AREG,BCAT1,C1QA,CD81,CDKN1A,CHAC1,DCX,DDX60,DHRS4,DOCK10,DOCK5,EDNRB,EGF,ENG,EPHA7,EPRS,F13A1,FAM129A,FAM135B,FAM151A,FZD4,GAD1,GNA14,GRAMD1B,GRK5,GTPBP2,IZUMO1,KCNAB3,MAPK4,MYC,NRSN1,OR2T4,PCDH15,PHGDH,PTPRG,PYCR1,RASGRF2,SEL1L,SEMA3C,SESN2,SGIP1,SLC1A4,SLC1A5,SLC35F1,SLC35F2,SLC6A9,SLC7A11,SLC7A3,SLC7A5,SLITRK6,SMOC1,SNTG1,SPATS2,ST8SIA5,SV2C,SYTL4,TMEM215,TRIM66,TRPM5,TSGA10,…	66
Lipid Metabolism, Molecular Transport, Small Molecule Biochemistry	accumulation of ceramide	0.00422				APP,PHGDH	2
DNA Replication, Recombination, and Repair, Energy Production, Molecular Transport, Nucleic Acid Metabolism, Small Molecule Biochemistry	depletion of ATP	0.00422				DDIT3,MYC	2
Cellular Development	immortalization of fibroblast cell lines	0.00422				CDKN1A,MYC	2
Cell-To-Cell Signaling and Interaction, Humoral Immune Response, Inflammatory Response	immune response of lymphoma cell lines	0.00422				ENG,MYC	2
Amino Acid Metabolism, Small Molecule Biochemistry	metabolism of glutamine	0.00422				MYC,PHGDH	2
Cellular Development, Cellular Growth and Proliferation, Connective Tissue Development and Function, Tissue Development	proliferation of synovial fibroblasts	0.00422				CDKN1A,MYC	2
Cell-To-Cell Signaling and Interaction, Connective Tissue Development and Function	response of fibroblast cell lines	0.00422				EGF,EIF4EBP1	2
Tissue Morphology	thickening of epithelial tissue	0.00422				APP,ENG	2
Cell Morphology, Cellular Function and Maintenance	autophagy	0.00424		0.626		APP,CDKN1A,DDIT3,EIF4EBP1,ENG,MYC,NUPR1,SESN2,TRIB3	9
Cell Cycle	cell cycle progression of breast cancer cell lines	0.00426				CDKN1A,EGF,MYC	3
Cancer, Cellular Development, Organismal Injury and Abnormalities, Tumor Morphology	differentiation of cancer cells	0.00426				CDKN1A,MYC,SERPINF1	3
Cell Death and Survival	apoptosis of central nervous system cells	0.00435		-0.194		APP,CDKN1A,DDIT3,SEL1L,SERPINF1	5
Connective Tissue Development and Function, Skeletal and Muscular System Development and Function, Tissue Morphology	quantity of bone cells	0.00435		-1.553		Cald1,CD81,EGF,F13A1,INPP4B	5
Cell Death and Survival, Organismal Injury and Abnormalities	apoptosis of epithelial cell lines	0.00436		0.572		APP,DDIT3,EGF,MYC,SERPINF1,TRIB3	6
Neurological Disease, Organismal Injury and Abnormalities	abnormality of corpus callosum	0.00446				APP,CD81,SLC1A4	3
Cell Cycle	entry into cell cycle progression	0.00446				APP,CDKN1A,MYC	3
Cellular Compromise	oxidative stress response of cells	0.00446				APP,DDIT3,MYC	3
Cellular Growth and Proliferation, Organ Development	proliferation of intestinal cells	0.00446				CDKN1A,EGF,MYC	3
Cellular Growth and Proliferation	colony formation of cells	0.00455		-0.061		AREG,CDKN1A,DDIT3,EGF,EIF4EBP1,MYC,NUPR1,PTPRG,S100A10,SEL1L	10
Cell Death and Survival	apoptosis of kidney	0.00456		0.577		C1QA,CDKN1A,DDIT3,EGF	4
Cancer, Gastrointestinal Disease, Organismal Injury and Abnormalities	large intestine adenocarcinoma	0.00463				AASS,ABTB2,ACTA2,ADM2,ALDH1A3,ALDH1L2,APP,ARL14EP,ATF5,B3GNT9,BCAT1,CAMK1D,CHAC1,DCX,DDIT3,DDX60,DOCK10,DOCK5,EDNRB,EGF,ENG,EPHA7,EPRS,ETV5,F13A1,FAM129A,FAM135B,FAM151A,FUT1,FZD4,GPD2,GPT2,GRAMD1B,GRK5,GTPBP2,HMGCS1,INPP4B,IZUMO1,KCNG3,LANCL3,MAPK4,MYC,NRSN1,OR2T4,PCDH15,PTPRG,RASGRF2,RCC2,SEL1L,SEMA3C,SESN2,SGIP1,SHC4,SLC1A4,SLC2A2,SLC35F1,SLC6A9,SLC7A11,SLC7A3,SLC7A5,SLITRK6,SMOC1,SNTG1,SPARCL…	75
Cell Death and Survival	apoptosis of skin cancer cell lines	0.0047				EGF,MYC	2
Cellular Growth and Proliferation, Embryonic Development	colony formation of embryonic cell lines	0.0047				EGF,PTPRG	2
Cardiovascular Disease	fatty lesion	0.0047				APP,C1QA	2
Cellular Movement	migration of neural precursor cells	0.0047				APP,DCX	2
Lipid Metabolism, Small Molecule Biochemistry, Vitamin and Mineral Metabolism	modification of retinaldehyde	0.0047				ALDH1A3,DHRS4	2
Embryonic Development, Organ Development, Organ Morphology, Organismal Development, Reproductive System Development and Function, Tissue Development	morphology of mammary alveolus	0.0047				AREG,EGF	2
Organismal Injury and Abnormalities, Reproductive System Disease	benign pelvic disease	0.00473				ACTA2,ALDH1A3,BCAT1,DCX,EDNRB,EIF4EBP1,MAPK4,MTHFD2,MYC,SLC1A4,SLC7A3	11
Energy Production	consumption of oxygen	0.00474		-0.762		APP,EGF,EIF4EBP1,GPD2,VGF	5
Nervous System Development and Function	righting reflex	0.00489				ALDH1A3,APP,PCDH15	3
Neurological Disease	Movement Disorders	0.00489		0.651	bias	AP1S2,APP,DDIT3,ETV5,FZD4,GAD1,GRK5,MYC,PSAT1,S100A10,SLC1A4,SLC6A9,SPARCL1,SYTL4,TENM4,TRIB3,VSNL1	17
Cell Morphology, Nervous System Development and Function, Organ Morphology, Organismal Development	morphology of brain cells	0.00497				C1QA,CD81,SPARCL1,SYTL4	4
Cancer, Gastrointestinal Disease, Organismal Injury and Abnormalities	colorectal cancer	0.00502				AASS,ACTA2,ADM2,ALDH1A3,ALDH1L2,AREG,ARL14EP,B3GNT9,CAMK1D,CDKN1A,CHAC1,CRYL1,DCX,DDIT3,DDX60,DOCK10,DOCK5,EDNRB,EGF,EIF4EBP1,ETV5,F13A1,FAM135B,FAM151A,FZD4,GAD1,GRK5,INPP4B,JADE3,KCNG3,MAPK4,MYC,OR2T4,PCDH15,PSAT1,RASGRF2,RCC2,SEL1L,SLC1A4,SLC2A2,SLC35F1,SLC6A9,SLC7A11,SLC7A3,SLC7A5,SLITRK6,SNTG1,SPARCL1,SV2C,TRIB3,TSGA10,UST,VGF,XPOT	54
Cardiovascular System Development and Function, Organismal Development	formation of blood vessel	0.00505		-1		APP,C1QA,CTH,INPP4B,SERPINF1	5
Cellular Movement, Hematological System Development and Function, Immune Cell Trafficking	migration of antigen presenting cells	0.00505		1.154		APP,CD81,EGF,ENG,S100A10	5
Cancer, Organismal Injury and Abnormalities	connective or soft tissue tumor	0.00505		-0.339		ACTA2,ALDH1A3,CDKN1A,DCX,DDIT3,DHRS4,EDNRB,EGF,EIF4EBP1,ENG,MTHFD2,MYC,PCDH15,S100A10,SLC7A11,SLC7A3,XPOT	17
Cardiovascular System Development and Function, Tissue Development	development of cardiovascular tissue	0.00506		1.109		APP,CDKN1A,CTH,EDNRB,EGF,ENG,MYC,SERPINF1	8
Developmental Disorder, Gastrointestinal Disease	congenital anomaly of digestive system	0.00508				ALDH1A3,Cald1,CDKN1A,EDNRB,EGF,GAD1,SLC2A2	7
Cellular Development, Cellular Growth and Proliferation, Embryonic Development, Organismal Development, Tissue Development	proliferation of neural stem cells	0.00511				APP,EGF,SEL1L	3
Behavior	sexual behavior	0.00511				APP,EGF,SYTL4	3
Cell-To-Cell Signaling and Interaction	adhesion of muscle cells	0.00521				ACTA2,APP	2
Cell Cycle	arrest in interphase of melanoma cell lines	0.00521				CDKN1A,MYC	2
Cellular Compromise	destabilization of filaments	0.00521				APP,F13A1	2
Cell Morphology	morphology of brain cancer cell lines	0.00521				CDKN1A,MYC	2
Cellular Assembly and Organization, Nervous System Development and Function	remodeling of neurites	0.00521				APP,CDKN1A	2
Behavior, Digestive System Development and Function	feeding	0.00523				ADM2,APP,CDKN1A,GAD1,GPD2,SLC6A9,TRPM5	7
Auditory Disease, Developmental Disorder, Hereditary Disorder, Metabolic Disease, Neurological Disease, Organismal Injury and Abnormalities	ABCD syndrome	0.00543				EDNRB	1
Cardiovascular Disease, Developmental Disorder, Hereditary Disorder, Metabolic Disease, Neurological Disease, Organismal Injury and Abnormalities, Psychological Disorders	APP-related cerebral amyloid angiopathy	0.00543				APP	1
Developmental Disorder, Hereditary Disorder, Organismal Injury and Abnormalities	Neu-Laxova syndrome type 1	0.00543				PHGDH	1
Developmental Disorder, Hereditary Disorder, Organismal Injury and Abnormalities	Neu-Laxova syndrome type 2	0.00543				PSAT1	1
Developmental Disorder, Hereditary Disorder, Neurological Disease, Organismal Injury and Abnormalities	Pettigrew syndrome	0.00543				AP1S2	1
Developmental Disorder, Hereditary Disorder, Neurological Disease, Organismal Injury and Abnormalities	X-linked lissencephaly type 1	0.00543				DCX	1
Developmental Disorder, Hereditary Disorder, Neurological Disease, Organismal Injury and Abnormalities	X-linked subcortical laminar heterotopia	0.00543				DCX	1
Nervous System Development and Function, Neurological Disease, Organ Morphology, Organismal Development, Organismal Injury and Abnormalities	abnormal morphology of nucleus accumbens	0.00543				CD81	1
Amino Acid Metabolism, Molecular Transport, Small Molecule Biochemistry	accumulation of glycine	0.00543				SLC6A9	1
Hematological System Development and Function, Immune Cell Trafficking, Inflammatory Response, Tissue Development	accumulation of monocytic myeloid derived suppressor cells	0.00543				DDIT3	1
Cell-To-Cell Signaling and Interaction, Nervous System Development and Function	action potential of CA3 neurons	0.00543				SLC6A9	1
Nervous System Development and Function	activation of brainstem	0.00543				SLC6A9	1
Cell-To-Cell Signaling and Interaction	activation of mucosa cells	0.00543				CDKN1A	1
Cell-To-Cell Signaling and Interaction	activation of stomach cancer cell lines	0.00543				EGF	1
Cell-To-Cell Signaling and Interaction, Cellular Compromise, Tumor Morphology	aggregation of retinoblastoma cells	0.00543				SERPINF1	1
Developmental Disorder, Hematological Disease, Hereditary Disorder, Metabolic Disease, Organismal Injury and Abnormalities	alpha-aminoadipic semialdehyde deficiency disease	0.00543				AASS	1
Nutritional Disease, Organismal Injury and Abnormalities, Psychological Disorders	anorexia-cachexia syndrome	0.00543				MYC	1
Cell Cycle, Cellular Growth and Proliferation	antiproliferative response of smooth muscle cells	0.00543				CDKN1A	1
Cell Death and Survival	apoptosis of ASE sensory neurons	0.00543				APP	1
Cancer, Cell Death and Survival, Organismal Injury and Abnormalities, Tumor Morphology	apoptosis of TM4t cells	0.00543				DDIT3	1
Cell Death and Survival	apoptosis of olfactory receptor neurons	0.00543				APP	1
Cell Morphology, Hematological System Development and Function, Inflammatory Response, Nervous System Development and Function	area of microglia	0.00543				APP	1
Cell Cycle, Connective Tissue Development and Function	arrest in G0 phase of fibroblasts	0.00543				CDKN1A	1
Cell Cycle, Reproductive System Development and Function	arrest in G1/S phase transition of breast cell lines	0.00543				MYC	1
Cancer, Cell Cycle, Organismal Injury and Abnormalities	arrest in G1/S phase transition of cancer cells	0.00543				CDKN1A	1
Cardiovascular System Development and Function, Cell Cycle	arrest in G1/S phase transition of endothelial cell lines	0.00543				MYC	1
Cell Cycle	arrest in G2/M phase transition of hepatoma cell lines	0.00543				ATF5	1
Cell Cycle, Connective Tissue Development and Function	arrest in cell cycle progression of synovial fibroblasts	0.00543				CDKN1A	1
Cell Cycle	arrest in germinal vesicle stage of oocytes	0.00543				EGF	1
Cancer, Cell Cycle, Organismal Injury and Abnormalities	arrest in sub-G1 phase of mesothelioma cells	0.00543				CDKN1A	1
Developmental Disorder, Hereditary Disorder, Neurological Disease, Organismal Injury and Abnormalities	asparagine synthetase deficiency	0.00543				ASNS	1
Cell-To-Cell Signaling and Interaction	association of neurons	0.00543				APP	1
Cell Cycle	asymmetric division of stem cells	0.00543				CDKN1A	1
Cell-To-Cell Signaling and Interaction, Reproductive System Development and Function	attachment of prostate cells	0.00543				ENG	1
Connective Tissue Disorders, Dermatological Diseases and Conditions, Developmental Disorder, Hereditary Disorder, Metabolic Disease, Organismal Injury and Abnormalities, Skeletal and Muscular Disorders	autosomal recessive cutis laxa type 2B	0.00543				PYCR1	1
Connective Tissue Disorders, Dermatological Diseases and Conditions, Developmental Disorder, Hereditary Disorder, Metabolic Disease, Neurological Disease, Ophthalmic Disease, Organismal Injury and Abnormalities	autosomal recessive cutis laxa type 3B	0.00543				PYCR1	1
Auditory Disease, Developmental Disorder, Hereditary Disorder, Neurological Disease, Organismal Injury and Abnormalities	autosomal recessive deafness DFNB23	0.00543				PCDH15	1
Developmental Disorder, Hereditary Disorder, Neurological Disease, Organismal Injury and Abnormalities	autosomal recessive mental retardation type 49	0.00543				GPT2	1
Cellular Assembly and Organization, Cellular Function and Maintenance, Cellular Movement, Molecular Transport, Nervous System Development and Function	axonal transport of heavy metal	0.00543				APP	1
Cell-To-Cell Signaling and Interaction	binding of retinoblastoma cell lines	0.00543				SERPINF1	1
Amino Acid Metabolism, Small Molecule Biochemistry	biosynthesis of asparagine	0.00543				ASNS	1
Cell Morphology, Organismal Injury and Abnormalities	blebbing of perikaryon	0.00543				APP	1
Connective Tissue Development and Function, Skeletal and Muscular System Development and Function	bone mineral content of epiphysis	0.00543				SERPINF1	1
Amino Acid Metabolism, Small Molecule Biochemistry	catabolism of L-lysine	0.00543				AASS	1
Cancer, Cell Cycle, Organismal Injury and Abnormalities	cell cycle progression of colon carcinoma cells	0.00543				CDKN1A	1
Cell Death and Survival, Skeletal and Muscular Disorders	cell death of HCSM cells	0.00543				APP	1
Cell Cycle	cell division of lymphoma cell lines	0.00543				MYC	1
Cell Morphology, Cellular Movement	cell spreading of hepatocytes	0.00543				EGF	1
Cancer, Cell Death and Survival, Organismal Injury and Abnormalities, Tumor Morphology	cell viability of neuroblastoma cells	0.00543				APP	1
Cell Death and Survival	cell viability of pericytes	0.00543				APP	1
Cell-To-Cell Signaling and Interaction, Cellular Assembly and Organization, Connective Tissue Development and Function	cell-cell contact of fibroblasts	0.00543				APP	1
Cellular Movement, Connective Tissue Development and Function	chemokinesis of fibroblasts	0.00543				EGF	1
Organismal Functions	circadian locomotor activity	0.00543				APP	1
Cellular Assembly and Organization	clearance of amyloid-beta plaques	0.00543				APP	1
Cellular Growth and Proliferation	cloning of melanoma cell lines	0.00543				MYC	1
Cellular Growth and Proliferation	clonogenicity of adenocarcinoma cell lines	0.00543				ACTA2	1
Cellular Assembly and Organization, Cellular Function and Maintenance	co-localization of lysosome	0.00543				EGF	1
Neurological Disease	cognitive deterioration	0.00543				APP	1
Cancer, Cellular Development, Cellular Growth and Proliferation, Organismal Injury and Abnormalities, Tumor Morphology	colony formation of leukemic blasts	0.00543				EIF4EBP1	1
Cellular Growth and Proliferation	colony formation of skeletal muscle satellite cells	0.00543				AREG	1
Cellular Development	commitment of neural stem cells	0.00543				SEL1L	1
Hereditary Disorder, Immunological Disease, Organismal Injury and Abnormalities	common variable immunodeficiency type 6	0.00543				CD81	1
Nervous System Development and Function	connection of parahippocampal gyrus	0.00543				APP	1
Nervous System Development and Function	connection of prefrontal cortex	0.00543				APP	1
Cell Morphology, Skeletal and Muscular System Development and Function	contractility of myofibroblasts	0.00543				ACTA2	1
Connective Tissue Development and Function, Organismal Injury and Abnormalities	contraction of granulation tissue	0.00543				ACTA2	1
Amino Acid Metabolism, Post-Translational Modification, Small Molecule Biochemistry	conversion of L-aspartic acid	0.00543				ASNS	1
Developmental Disorder, Hereditary Disorder, Metabolic Disease, Organismal Injury and Abnormalities	cystathioninuria	0.00543				CTH	1
Cell Death and Survival, Cellular Compromise	cytotoxicity of brain cancer cell lines	0.00543				EGF	1
Cell Death and Survival, Cellular Compromise, Nervous System Development and Function	cytotoxicity of hippocampal neurons	0.00543				APP	1
Cellular Compromise	damage of lung cell lines	0.00543				EGF	1
Auditory Disease, Hereditary Disorder, Neurological Disease, Ophthalmic Disease, Organismal Injury and Abnormalities	deafness and myopia	0.00543				SLITRK6	1
Amino Acid Metabolism, Post-Translational Modification, Small Molecule Biochemistry	deamination of L-arginine	0.00543				APP	1
Tissue Morphology	deficiency of melanocytes	0.00543				EDNRB	1
Cardiovascular Disease, Organismal Injury and Abnormalities, Tissue Morphology	degeneration of vascular tissue	0.00543				APP	1
Cancer, Cell Cycle, Organismal Injury and Abnormalities	delay in G2 phase of colon carcinoma cells	0.00543				CDKN1A	1
Cell Cycle	delay in cell cycle progression of colorectal cancer cell lines	0.00543				CDKN1A	1
Cell Cycle, Reproductive System Development and Function	delay in initiation of G2/M phase transition of gonadal cell lines	0.00543				Cald1	1
Cell Death and Survival, Tissue Morphology	delay in initiation of loss of photoreceptors	0.00543				SERPINF1	1
Cellular Assembly and Organization, Nervous System Development and Function, Tissue Morphology	density of axon terminals	0.00543				APP	1
Cell Morphology, Cellular Assembly and Organization, Cellular Development, Cellular Function and Maintenance, Cellular Growth and Proliferation, Embryonic Development, Nervous System Development and Function, Organismal Development, Tissue Development, Tissue Morphology	density of mushroom spine	0.00543				APP	1
Cell Morphology, Cellular Function and Maintenance	depolarization of taste receptor cells	0.00543				TRPM5	1
Cellular Assembly and Organization, Cellular Compromise	depolymerization of keratin intermediate filaments	0.00543				EGF	1
Cell-To-Cell Signaling and Interaction	detachment of prostate cell lines	0.00543				ENG	1
Cancer, Hematological Disease, Immunological Disease, Organismal Injury and Abnormalities	development of diffuse large B-cell lymphoma	0.00543				MYC	1
Embryonic Development, Nervous System Development and Function, Organ Development, Organismal Development, Tissue Development	development of nucleus accumbens	0.00543				ALDH1A3	1
Cell Morphology, Cellular Assembly and Organization, Cellular Development, Cellular Function and Maintenance, Cellular Growth and Proliferation, Nervous System Development and Function, Organismal Development, Tissue Development	development of retinocollicular projection	0.00543				EPHA7	1
Embryonic Development, Organismal Development, Skeletal and Muscular System Development and Function	development of wing	0.00543				APP	1
Cellular Development, Nervous System Development and Function, Tissue Development	differentiation of lower motor neuron	0.00543				SERPINF1	1
Cancer, Cellular Development, Organismal Injury and Abnormalities, Tumor Morphology	differentiation of retinoblastoma cells	0.00543				SERPINF1	1
Organismal Development	dilation of common bile duct	0.00543				EGF	1
Lipid Metabolism, Small Molecule Biochemistry	disruption of lipid	0.00543				APP	1
Cellular Assembly and Organization	dissociation of microfilaments	0.00543				Cald1	1
Neurological Disease, Psychological Disorders	duplication 15q11-q13 positive autism spectrum disorder	0.00543				APP	1
Neurological Disease, Organismal Injury and Abnormalities	dysfunction of entorhinal area	0.00543				APP	1
Developmental Disorder, Neurological Disease, Organismal Injury and Abnormalities	dystrophy of cholinergic fibers	0.00543				APP	1
Cardiovascular Disease, Metabolic Disease, Neurological Disease, Organismal Injury and Abnormalities, Psychological Disorders	early-onset Alzheimer disease with cerebral amyloid angiopathy	0.00543				APP	1
Amino Acid Metabolism, Molecular Transport, Small Molecule Biochemistry	efflux of L-lysine	0.00543				SLC7A5	1
Cellular Function and Maintenance	elimination of leukemia cell lines	0.00543				MYC	1
Cell Cycle, Cell Morphology, Cellular Assembly and Organization, Cellular Movement	elongation of amyloid fibrils	0.00543				APP	1
Cell Morphology	elongation of dopaminergic neurons	0.00543				EGF	1
Cell Cycle, Cell Morphology, Cellular Assembly and Organization, Cellular Movement	elongation of protofibrils	0.00543				APP	1
Cell Cycle	endoreduplication of carcinoma cell lines	0.00543				CDKN1A	1
Cell Cycle	endoreduplication of lung cancer cell lines	0.00543				CDKN1A	1
Molecular Transport	entrance of DNA	0.00543				MYC	1
Cell Cycle, Connective Tissue Development and Function	entry into G1 phase of fibroblasts	0.00543				CDKN1A	1
Cell Cycle	entry into cell cycle progression of pheochromocytoma cell lines	0.00543				APP	1
Amino Acid Metabolism, Small Molecule Biochemistry	exchange of L-cystine	0.00543				SLC7A11	1
Cellular Development, Cellular Growth and Proliferation, Nervous System Development and Function, Organ Development, Tissue Development	expansion of mesencephalic neurons	0.00543				EGF	1
Cardiovascular Disease, Hereditary Disorder, Organismal Injury and Abnormalities	familial thoracic aortic aneurysm type 6	0.00543				ACTA2	1
Cell-To-Cell Signaling and Interaction, Nervous System Development and Function	firing of GABAergic neurons	0.00543				APP	1
Cell-To-Cell Signaling and Interaction, Nervous System Development and Function	firing of place cells	0.00543				APP	1
Lymphoid Tissue Structure and Development, Organismal Functions	flow of lymphatic fluid	0.00543				MYC	1
Cell Morphology	fluidity of Golgi membrane	0.00543				APP	1
Cellular Assembly and Organization, DNA Replication, Recombination, and Repair	formation of extrachromosomal cores	0.00543				MYC	1
Cellular Assembly and Organization, DNA Replication, Recombination, and Repair	formation of replication fork	0.00543				MYC	1
Cellular Assembly and Organization	formation of spindle pole bodies	0.00543				EGF	1
Embryonic Development	frequency of hemangioblasts	0.00543				ENG	1
Cellular Function and Maintenance, Nervous System Development and Function, Organ Development	function of brain cells	0.00543				APP	1
Cell Cycle, Hematological System Development and Function	gene amplification of B-lymphocyte derived cell lines	0.00543				MYC	1
Cancer, Cellular Development, Cellular Growth and Proliferation, Organismal Injury and Abnormalities	generation of pancreatic cancer cells	0.00543				MYC	1
Developmental Disorder, Gastrointestinal Disease, Hepatic System Disease, Hereditary Disorder, Metabolic Disease, Organismal Injury and Abnormalities, Renal and Urological Disease	glycogenosis with glucoaminophosphaturia	0.00543				SLC2A2	1
Embryonic Development, Organ Development, Organismal Development, Reproductive System Development and Function, Tissue Development	growth of vagina	0.00543				EGF	1

## Sheet: Supp Table 3
Table S3
Ingenuity upstream regulator analysis, based on the microarray dataset
© 2000-2017 QIAGEN. All rights reserved.
Upstream Regulator	Expr Fold Change	Molecule Type	Predicted Activation State	Activation z-score	p-value of overlap	Target molecules in dataset	Mechanistic Network
ATF4		transcription regulator	Activated	4.659	2.86e-30	AREG,ASNS,ATF5,BCAT1,CDKN1A,CHAC1,CTH,DDIT3,EIF4EBP1,MTHFD2,NUPR1,PCK2,PHGDH,PSAT1,PYCR1,SEL1L,SERPINF1,SLC1A4,SLC1A5,SLC6A9,SLC7A11,SLC7A3,SLC7A5,TRIB3,XPOT
UCP1		transporter	Activated	3.753	7.77e-20	ASNS,ATF5,CTH,DDIT3,EIF4EBP1,FUT1,MTHFD2,MYC,NUPR1,OTUB2,PCK2,PHGDH,PSAT1,PYCR1,SLC6A9,TENM4,TRIB3,XPOT
ALDH2		enzyme	Inhibited	-2.985	2.29e-15	ATF5,CTH,MTHFD2,PHGDH,PSAT1,SLC1A4,SLC7A11,SLC7A3,SLC7A5
TRIB3	3.704	kinase	Inhibited	-2.596	6.98e-11	ASNS,CTH,DDIT3,MTHFD2,PCK2,PSAT1,TRIB3	25 (2)
EIF2AK3		kinase			1.72e-10	ASNS,ATF5,DDIT3,EIF4EBP1,EPRS,MYC,NUPR1,PCK2,SEL1L,SLC1A4	16 (4)
EIF2AK4		kinase	Activated	2.401	9.63e-09	ASNS,CHAC1,DDIT3,PCK2,PHGDH,PSAT1
GNE		kinase	Inhibited	-2	2.85e-08	ASNS,CHAC1,DDIT3,TRIB3
IDO1		enzyme	Activated	2.177	6.28e-08	SLC1A4,SLC1A5,SLC6A9,SLC7A11,SLC7A5
EIF2A		translation regulator			1.56e-07	ATF5,DDIT3,PCK2
TGFB1		growth factor		1.511	1.48e-06	AASS,ACTA2,APP,AREG,ASNS,C1QA,CDKN1A,EDNRB,EGF,ENG,EPRS,F13A1,GAD1,GNA14,LYVE1,MTHFD2,MYC,NUPR1,PHGDH,RASGRF2,S100A10,SERPINF1,SLC7A5,SPARCL1,TENM4,UST	48 (17)
Collagen type I		complex		-0.555	1.56e-06	ACTA2,APP,EIF4EBP1,F13A1,MYC,S100A10	28 (13)
Raf		group			1.56e-06	AREG,CDKN1A,EGF,ETV5,MYC,SEMA3C	38 (16)
IFNG		cytokine		0.829	1.9e-06	ACTA2,ALDH1A3,APP,AREG,ASNS,C1QA,CDKN1A,CHAC1,DDIT3,EDNRB,EGF,GAD1,GNA14,HMGCS1,MYC,NUPR1,PHGDH,S100A10,SLC2A2,SLC7A11,SLC7A5,VSNL1	41 (13)
TDO2		enzyme			5.37e-06	SLC1A4,SLC1A5,SLC7A11
GDF2		growth factor	Activated	2.186	8.47e-06	ENG,LYVE1,MYC,SEMA3C,SERPINF1,SPARCL1	8 (3)
GPD1		enzyme			1.24e-05	APP,ASNS,CYP39A1,FAM129A,GPD2,PSAT1
CREB1		transcription regulator		0.632	1.25e-05	ATF5,CAMK1D,CDKN1A,DCX,GAD1,HMGCS1,LMO1,MYC,NNAT,NRSN1,SV2C,VGF,Zim1
SLC25A13		transporter			1.4e-05	APP,ASNS,CYP39A1,FAM129A,GPD2,PSAT1
DDIT3	1.64	transcription regulator	Activated	2.161	1.71e-05	ATF5,DDIT3,TENM4,TRIB3,XPOT
RB1CC1		other			1.82e-05	ALDH1A3,CDKN1A,MYC	18 (5)
RELN		peptidase			1.82e-05	APP,GAD1,LYVE1
RFWD2		enzyme			1.82e-05	CDKN1A,ETV5,TRIB3
TP53		transcription regulator		1.471	2.05e-05	ACTA2,APP,AREG,ASNS,Cald1,CD81,CDKN1A,DDIT3,EGF,ENG,FUT1,GNA14,HMGCS1,MAPK4,MYC,NUPR1,PHGDH,SEL1L,SEMA3C,SESN2,SLC7A5,TRIB3	37 (14)
ESR2		ligand-dependent nuclear receptor		0.664	2.14e-05	ATF5,BCAT1,CDKN1A,MAPK4,MYC,OTUB2,PSAT1,PYCR1,SMOC1,SYTL4,TENM4	20 (4)
IL5		cytokine		1.808	2.24e-05	AREG,ASNS,CDKN1A,EIF4EBP1,MYC,PSAT1,PYCR1,SLC1A5,SLC7A5	36 (6)
TAS1R3		g-protein coupled receptor			2.49e-05	SLC1A5,SLC7A11,SLC7A3
EZR		other		0.469	2.63e-05	DDIT3,EIF4EBP1,MYC,TRIB3
FGF2		growth factor		0.999	2.72e-05	ACTA2,AREG,CDKN1A,DDIT3,EDNRB,ETV5,LYVE1,MYC,S100A10,VGF	43 (18)
Hdac		group		-0.378	2.83e-05	AREG,CDKN1A,DDIT3,EDNRB,GAD1,MYC,SEMA3C	28 (8)
ANXA2		other		-1.172	2.99e-05	CDKN1A,MYC,S100A10,SESN2	6 (3)
ACVRL1		kinase			3.37e-05	CDKN1A,ENG,LYVE1,MYC	5 (3)
APBB1		transcription regulator			5.43e-05	ACTA2,APP,MYC
EGR1		transcription regulator		-0.38	6.18e-05	ACTA2,AREG,CDKN1A,EIF4EBP1,GAD1,MYC,SV2C	24 (12)
PDGF BB		complex		0.669	6.49e-05	ACTA2,AREG,CDKN1A,CTH,DDIT3,EDNRB,HMGCS1,MYC,TRIB3	38 (16)
PIK3R1		kinase		1.387	6.65e-05	ATF5,DDIT3,ENG,MYC,TRIB3	15 (3)
WNT3A		cytokine		-0.785	6.71e-05	ACTA2,ADM2,ALDH1A3,APP,ENG,ETV5,MYC,TRIB3	32 (8)
IGFBP7		transporter			6.76e-05	ASNS,CDKN1A,MYC	8 (3)
PURA		transcription regulator			6.76e-05	ACTA2,CDKN1A,MYC
SPHK1		kinase		-0.068	7.87e-05	ACTA2,APP,CDKN1A,DDIT3	37 (11)
PDGFRA		kinase			8.29e-05	ACTA2,CDKN1A,MYC	17 (4)
HRAS		enzyme	Activated	2.376	8.44e-05	ALDH1A3,APP,AREG,ASNS,Cald1,CD81,CDKN1A,DDIT3,EIF4EBP1,GNA14,MYC,SLC2A2	49 (11)
ELL		transcription regulator			8.73e-05	CDKN1A,MYC
PURB		transcription regulator			8.73e-05	ACTA2,MYC
MPO		enzyme			8.73e-05	APP,EDNRB
CTH	2.858	enzyme			8.73e-05	CDKN1A,DDIT3
ALB		transporter			9.46e-05	ACTA2,CDKN1A,DDIT3,EDNRB	34 (7)
DLX2		transcription regulator			0.0001	CDKN1A,GAD1,MYC
MXI1		transcription regulator			0.0001	MTHFD2,MYC,SLC1A4
ERBB4		kinase		-0.074	0.000106	ACTA2,CDKN1A,DDIT3,MYC,SPARCL1	30 (10)
S100B		other			0.00012	APP,CDKN1A,MYC	42 (14)
ADRB		group		-0.896	0.000121	ATF5,CDKN1A,DDIT3,HMGCS1,SLC6A9,SLC7A11
NFkB (complex)		complex		1.151	0.000123	ALDH1A3,APP,CDKN1A,DDIT3,EDNRB,GAD1,GRK5,MYC,SLC2A2,SLC7A5,TRIB3,VSNL1	33 (13)
TCF		group			0.000139	F13A1,GAD1,MYC,SEMA3C,SLC1A5	18 (4)
PELP1		other			0.000157	EGF,MAPK4,MYC,PSAT1	19 (3)
DDX5		enzyme			0.000166	ACTA2,CDKN1A,MYC	21 (10)
H2AFB3 (includes others)		other	Activated	2	0.000169	ATF5,CDKN1A,CHAC1,LMO1
ELK1		transcription regulator		1.964	0.000182	CDKN1A,MTHFD2,NUPR1,SLC7A11
HSPA9		other			0.000193	CDKN1A,MYC,SESN2	12 (3)
GNA15		enzyme			0.000196	ACTA2,CTH,DDIT3,MYC,TRIB3	27 (4)
FOXO3		transcription regulator		-0.425	0.000235	CDKN1A,DDIT3,EIF4EBP1,GAD1,MTHFD2,MYC,NUPR1,SLC1A4	23 (8)
TP63		transcription regulator		1.243	0.000236	ALDH1A3,AREG,ARL14EP,CDKN1A,ENG,FUT1,MYC,SERPINF1,SLC7A11
NR1I3		ligand-dependent nuclear receptor		1.069	0.000237	CDKN1A,CYP39A1,EIF4EBP1,MYC,Sult1d1
IL1B		cytokine		0.888	0.000259	ACTA2,APP,ATF5,CDKN1A,DDIT3,ENG,F13A1,FAM129A,GAD1,MYC,S100A10,SLC2A2,SLC7A11,VSNL1	49 (16)
TYMS		enzyme			0.000289	CDKN1A,MYC
GNL2		enzyme			0.000289	CDKN1A,MYC
RHOC		enzyme			0.000289	CDKN1A,DDIT3	16 (4)
PDGF-AA		complex			0.00029	ACTA2,AREG,CDKN1A
MIR17HG		other			0.00029	ACTA2,CDKN1A,FZD4
NR2E1		ligand-dependent nuclear receptor			0.00029	CDKN1A,DCX,MYC	4 (2)
LCAT		enzyme			0.00029	APP,DDIT3,MYC
DKK1		growth factor		0.343	0.000298	ACTA2,APP,CDKN1A,MYC	37 (10)
MMP9		peptidase		1.131	0.000318	ACTA2,CDKN1A,DDIT3,MYC	32 (18)
IGF1		growth factor		0.598	0.000369	ACTA2,APP,C1QA,CDKN1A,DDIT3,EGF,GPD2,MYC,NUPR1	46 (14)
GATA6		transcription regulator		1.706	0.000378	ACTA2,Cald1,CDKN1A,CRYL1,LYVE1,SEMA3C
NFE2L2		transcription regulator		0.563	0.000382	CDKN1A,DDIT3,GNA14,NRSN1,PSAT1,SLC1A4,SLC6A9,SLC7A11,VSNL1
CTSB		peptidase			0.000414	ACTA2,APP,MYC	28 (17)
BICC1		other			0.000432	AREG,EGF
AMER1		other			0.000432	AREG,CDKN1A
AQP11		transporter			0.000432	EGF,MYC
PLSCR1		enzyme			0.000432	CDKN1A,MYC
AATF		transcription regulator			0.000432	APP,CDKN1A	25 (4)
SPP1		cytokine		0	0.00044	CDKN1A,CYP39A1,EGF,MYC,SERPINF1,SPARCL1	48 (12)
HTT		transcription regulator			0.000454	ACTA2,APP,CDKN1A,DDIT3,EDNRB,GAD1,GRK5,HMGCS1,SERPINF1,ST8SIA5,VGF,VSNL1	41 (13)
JAG1		growth factor			0.000462	ACTA2,CDKN1A,MYC	25 (9)
CTCF		transcription regulator		0.883	0.000513	APP,CDKN1A,GAD1,MYC
HOXB13		transcription regulator			0.000514	CDKN1A,EPHA7,MYC
DVL1		other			0.000603	APP,MYC	37 (10)
SETD7		enzyme			0.000603	MYC,SLC2A2	11 (3)
AFF1		transcription regulator			0.000603	EPHA7,MYC
ZNF217		transcription regulator			0.000638	GAD1,MYC,SHC4,VSNL1
WNT1		cytokine		1.982	0.000649	ACTA2,CDKN1A,EIF4EBP1,MYC,SEMA3C	33 (13)
PRKCE		kinase		1.36	0.000672	ACTA2,APP,CDKN1A,MYC	41 (15)
PRKCZ		kinase			0.000689	MYC,PHGDH,PSAT1
IFI16		transcription regulator		1.835	0.000744	AREG,CD81,CDKN1A,MTHFD2
ERBB2		kinase		1.432	0.000756	ACTA2,AREG,CDKN1A,DDIT3,EIF4EBP1,ETV5,FZD4,GPD2,MAPK4,MYC,PCK2,SPARCL1	42 (15)
Cg		complex		1.331	0.000772	ACTA2,AREG,BCAT1,CDKN1A,EPHA7,FZD4,S100A10,TENM4
TBX2		transcription regulator		-1.941	0.000782	ATF5,CDKN1A,DDIT3,TRIB3
MYC	1.722	transcription regulator		0.803	0.000791	APP,ASNS,BCAT1,Cald1,CDKN1A,DDIT3,EIF4EBP1,FAM129A,MYC,PSAT1,PYCR1,S100A10,SLC1A5,SLC2A2,SLC7A5	53 (13)
Cyclin A		group			0.000801	CDKN1A,MYC	27 (5)
SMARCA1		transcription regulator			0.000801	CDKN1A,MYC	15 (4)
SDC2		other			0.000801	ACTA2,CDKN1A
SOAT1		enzyme			0.000801	APP,DDIT3
TRAP1		enzyme			0.000825	ALDH1L2,GPT2,MTHFD2
SETD2		enzyme			0.000825	ENG,SEMA3C,SERPINF1
SREBF1		transcription regulator		-0.211	0.000873	Bhlhe41,CAMK1D,CDKN1A,HMGCS1,PCK2,SLC2A2	27 (8)
LRP1		transmembrane receptor			0.000899	APP,DDIT3,SERPINF1	45 (11)
mir-24		microrna			0.000976	CDKN1A,MYC,TRIB3
TENM1		transmembrane receptor			0.00103	EDNRB,SLC1A4
HUWE1		transcription regulator			0.00103	CDKN1A,MYC	8 (3)
mir-194		microrna			0.00103	ACTA2,SLC7A5
PTGES3		enzyme			0.00103	MYC,NUPR1	8 (3)
ING4		transcription regulator			0.00103	CDKN1A,MYC
KIF3A		enzyme			0.00103	CDKN1A,MYC
SLC30A3		transporter			0.00103	APP,DCX
INS		other			0.00114	CDKN1A,DDIT3,EIF4EBP1,SLC2A2,TRIB3	25 (7)
LRP6		transmembrane receptor			0.00114	ACTA2,APP,MYC	37 (10)
MYOCD		transcription regulator		1.242	0.00119	ACTA2,Cald1,CDKN1A,DDIT3
26s Proteasome		complex		-0.849	0.00121	ATF5,CDKN1A,DDIT3,EGF,MYC	31 (13)
CERS2		transcription regulator			0.00128	CDKN1A,DDIT3
IL9R		transmembrane receptor			0.00128	AREG,MYC
Igkv1-117		other			0.00128	CDKN1A,MYC	23 (8)
FOXO1		transcription regulator		0.234	0.00129	CDKN1A,DCX,EIF4EBP1,GPD2,MYC,PCK2,SLC2A2,TRIB3	27 (7)
ITGB1		transmembrane receptor		-0.218	0.0013	ACTA2,CDKN1A,EIF4EBP1,MYC	43 (17)
FGFR1		kinase		1	0.00135	CDKN1A,EIF4EBP1,MYC,SLC2A2	36 (4)
SBDS		other			0.00135	CHAC1,CTH,DDIT3,TRIB3
Creb		group		1.342	0.00137	AASS,AREG,CDKN1A,CTH,ETV5,PYCR1,SLC7A11
ATF3		transcription regulator			0.00141	ASNS,CDKN1A,CHAC1,DDIT3	34 (7)
SMAD1		transcription regulator			0.00143	ACTA2,CDKN1A,MYC	3 (2)
Laminin		complex			0.00153	ACTA2,APP,ETV5
PPP2CA		phosphatase			0.00153	CDKN1A,EIF4EBP1,MYC	11 (5)
PPARGC1A		transcription regulator	Activated	2.236	0.00154	CDKN1A,PCK2,SESN2,SPARCL1,ST8SIA5,TRIB3	11 (2)
MAFA		transcription regulator			0.00156	DDIT3,SLC2A2
TOP1		enzyme			0.00156	ASNS,CDKN1A
CEBPG		transcription regulator			0.00156	ASNS,DDIT3	23 (3)
NUMBL		other			0.00156	CDKN1A,MYC
DDX17		enzyme			0.00156	CDKN1A,MYC
RPS6KA3		kinase			0.00156	DDIT3,MYC	33 (9)
PNPT1		enzyme			0.00156	CDKN1A,MYC
CD38		enzyme	Activated	2.236	0.00163	ASNS,EIF4EBP1,PSAT1,PYCR1,SLC7A5
CEBPB		transcription regulator		0.762	0.00166	ACTA2,ASNS,CDKN1A,DDIT3,EPHA7,MYC,NUPR1,TRIB3	30 (6)
SKIL		transcription regulator			0.00175	ACTA2,CDKN1A,SLC1A5
BMP6		growth factor			0.00179	ACTA2,CDKN1A,CYP39A1,ETV5	5 (3)
ADCYAP1		other		0.218	0.0018	GRK5,LMO1,MAPK4,MYC,S100A10,SERPINF1
REL		transcription regulator		1.671	0.00184	APP,CDKN1A,ETV5,GPT2,MYC,PHGDH	27 (4)
Ppp2c		group			0.00186	CDKN1A,EIF4EBP1
AURKA		kinase			0.00186	CDKN1A,MYC	24 (11)
EPCAM		other			0.00186	CDKN1A,MYC
Rock		group			0.002	APP,CDKN1A,MYC	48 (15)
YAP1		transcription regulator			0.00201	ACTA2,AREG,CDKN1A,MYC	21 (11)
Hnf3		group			0.00219	PCK2,SLC2A2
GSX2		transcription regulator			0.00219	ALDH1A3,GAD1
PLD1		enzyme			0.00219	APP,MYC	36 (9)
RLN2		other			0.00219	ACTA2,EDNRB
TP73		transcription regulator		1.311	0.00233	ACTA2,CDKN1A,CTH,DDIT3,GRK5,NUPR1,SERPINF1
IL3		cytokine		1.906	0.00241	AREG,ATF5,C1QA,CDKN1A,DDIT3,MYC,PHGDH	42 (12)
Ptprd		phosphatase			0.00255	CDKN1A,MYC
SPHK2		kinase			0.00255	APP,CDKN1A
LAMC1		other			0.00255	ACTA2,ETV5
SMPD1		enzyme			0.00255	ACTA2,SLC2A2
MAP2K1		kinase		1.588	0.00262	ACTA2,AREG,CDKN1A,ETV5,MYC	34 (19)
PDX1		transcription regulator			0.00268	FUT1,GALNT18,MYC,PHGDH,SLC2A2
DGCR8		enzyme			0.00268	ACTA2,MYC,SMOC1
BRCA1		transcription regulator		0.049	0.00275	ALDH1A3,AREG,CDKN1A,DDIT3,MYC	38 (15)
GSK3B		kinase			0.00286	APP,CDKN1A,DDIT3,MYC	42 (13)
AR		ligand-dependent nuclear receptor		1.109	0.0029	CDKN1A,EDNRB,INPP4B,MTHFD2,MYC,NUPR1,SLC7A11,VSNL1	8 (2)
MDK		growth factor			0.00293	ACTA2,Cald1
ZBTB33		other			0.00293	CDKN1A,MYC	2 (2)
CDH2		other			0.00293	ACTA2,CDKN1A
PNN		other			0.00293	CDKN1A,MYC
MAZ		transcription regulator			0.00293	CDKN1A,MYC	16 (4)
CBX3		transcription regulator			0.00293	CDKN1A,MYC
NDN		transcription regulator			0.00293	CDKN1A,MYC	8 (2)
IGF1R		transmembrane receptor		1.71	0.00298	ACTA2,APP,CDKN1A,DDIT3,MYC,SLC2A2	42 (16)
RXRA		ligand-dependent nuclear receptor			0.00304	APP,ASNS,CDKN1A,ENG,PCK2,SLC2A2	11 (2)
PKD1		ion channel		-1	0.0031	BCAT1,CDKN1A,EIF4EBP1,FAM151A,SLC2A2
KLF5		transcription regulator			0.00316	ACTA2,CDKN1A,MYC	31 (8)
PPARA		ligand-dependent nuclear receptor		-0.314	0.00319	APP,ASNS,C1QA,CDKN1A,CTH,GPD2,HMGCS1,MYC	32 (10)
NGF		growth factor	Activated	2.161	0.00333	APP,CDKN1A,ETV5,MYC,VGF	47 (16)
HDAC5		transcription regulator			0.00333	ACTA2,CDKN1A,MYC
RFX3		transcription regulator			0.00334	MYC,SLC2A2
GTF2I		transcription regulator			0.00334	CDKN1A,MYC	6 (2)
CXCR4		g-protein coupled receptor			0.00368	CDKN1A,GAD1,MYC	20 (9)
SERPINF1	1.529	other			0.00368	ACTA2,MYC,SERPINF1	11 (3)
PRKCB		kinase			0.00368	APP,CDKN1A,MYC	42 (15)
Endothelin		group			0.00377	APP,MYC	26 (4)
mir-192		microrna			0.00377	ACTA2,CDKN1A	25 (4)
ARG1		enzyme			0.00377	CDKN1A,DDIT3
HNRNPA1		enzyme			0.00377	APP,MYC
PRL		cytokine		0.625	0.00378	APP,CDKN1A,EGF,LYVE1,MYC,NUPR1	47 (14)
NTRK2		kinase			0.00387	APP,GAD1,MYC
ARNT		transcription regulator			0.00393	AREG,CD81,ENG,PCK2
RNF20		enzyme			0.00422	CDKN1A,MYC
NUMB		other			0.00422	APP,CDKN1A
ATP2A2		transporter			0.00422	APP,DDIT3
GFI1B		transcription regulator			0.00422	CDKN1A,MYC
ADRB1		g-protein coupled receptor			0.00422	APP,DDIT3	26 (4)
ESR1		ligand-dependent nuclear receptor		0.637	0.00439	AASS,AREG,ATF5,BCAT1,CDKN1A,EGF,MYC,OTUB2,PSAT1,PYCR1,SEMA3C,SLC1A4,SLC7A11,SLC7A5,TRIB3	32 (12)
RHO		g-protein coupled receptor			0.00446	APP,C1QA,DDIT3	27 (4)
NRIP1		transcription regulator			0.00446	AREG,CDKN1A,OTUB2	20 (4)
HIC1		transcription regulator			0.00446	ACTA2,CDKN1A,SLC7A11
IRS1		enzyme			0.00456	DDIT3,MYC,SPARCL1,TRIB3
PDGFB		growth factor			0.00467	ACTA2,MYC,SERPINF1	31 (7)
MAPK8IP1		other			0.0047	APP,SLC2A2
CHEK1		kinase			0.0047	CDKN1A,MYC	40 (12)
MPZ		other			0.0047	DDIT3,HMGCS1
SOX6		transcription regulator			0.0047	CDKN1A,MYC	25 (7)
LRPAP1		other			0.0047	APP,DDIT3
MST1R		kinase			0.0047	ACTA2,MYC
PSEN1		peptidase		0.328	0.00494	APP,C1QA,DCX,FZD4,MYC,NUPR1,VSNL1
EPAS1		transcription regulator			0.00494	AREG,C1QA,DDIT3,HMGCS1,SLC7A5
Ras homolog		group			0.00521	CDKN1A,MYC	33 (13)
ERVW-1		other			0.00521	CDKN1A,SLC1A4
GPER1		g-protein coupled receptor			0.00521	CDKN1A,MYC	36 (15)
HFE		transmembrane receptor			0.00521	DDIT3,SLC2A2
RACK1		enzyme			0.00521	CDKN1A,MYC	31 (18)
MAP2K2		kinase			0.00521	CDKN1A,ETV5	7 (2)
FN1		enzyme		0.8	0.00525	ACTA2,APP,BCAT1,CDKN1A,MYC	43 (17)
HGF		growth factor		-0.454	0.00536	ACTA2,ASNS,CDKN1A,DDIT3,GRK5,LYVE1,MYC,SLC2A2	47 (17)
FGFR2		kinase			0.00539	CDKN1A,GPT2,MYC,NNAT
CRB2		other			0.00543	APP
TRIM72		enzyme			0.00543	ACTA2
Ggt		group			0.00543	SLC7A5
Cofilin		group			0.00543	MYC
LINC00475		other			0.00543	CDKN1A
WTIP		transcription regulator			0.00543	AREG
ECE2		peptidase			0.00543	APP
FBXL12		enzyme			0.00543	CDKN1A
ENTPD7		enzyme			0.00543	APP
ARMC10		other			0.00543	CDKN1A
FKBPL		other			0.00543	CDKN1A
ZBTB7C		other			0.00543	CDKN1A
EBF4		transcription regulator			0.00543	CDKN1A
CALHM1		ion channel			0.00543	APP
CXXC1		transcription regulator			0.00543	CDKN1A
GSAP		peptidase			0.00543	APP
ECE		group			0.00543	APP
ZBTB8A		other			0.00543	CDKN1A
SLC2A12		transporter			0.00543	SLC1A5
MAN2C1		enzyme			0.00543	DDIT3
ZDHHC21		enzyme			0.00543	APP
USP36		peptidase			0.00543	MYC
HM13		peptidase			0.00543	APP
PCLAF		other			0.00543	CDKN1A
PON2		enzyme			0.00543	DDIT3
WNT16		other			0.00543	CDKN1A
FBXL2		enzyme			0.00543	APP
Cathepsin		group			0.00543	ACTA2
GLIPR1		other			0.00543	MYC
NSMCE3		other			0.00543	MYC
SORCS1		transporter			0.00543	APP
STMN2		other			0.00543	APP
CAVIN1		transcription regulator			0.00543	MYC
RBMS1		other			0.00543	MYC
MYLPF		other			0.00543	ACTA2
KLC1		other			0.00543	APP
CDT1		other			0.00543	CDKN1A
SLK		kinase			0.00543	DDIT3
CDC45		other			0.00543	MYC
ACVR2B		kinase			0.00543	CDKN1A
FBXL20		enzyme			0.00543	APP
TSTA3		enzyme			0.00543	ACTA2
SYNJ1		phosphatase			0.00543	APP
mir-500		microrna			0.00543	GAD1
RTN1		other			0.00543	APP
ARF3		enzyme			0.00543	APP
RAB22A		enzyme			0.00543	VGF
ZBTB5		other			0.00543	CDKN1A
DHX8		enzyme			0.00543	CDKN1A
HUNK		kinase			0.00543	MYC
APBA2		transporter			0.00543	APP
ITIH5		other			0.00543	ACTA2
DNASE1L3		enzyme			0.00543	CDKN1A
CCNI		other			0.00543	CDKN1A
BACE2		peptidase			0.00543	APP
FXYD1		ion channel			0.00543	CDKN1A
QPCT		enzyme			0.00543	APP
HERPUD1		other			0.00543	DDIT3
Sin3b		transcription regulator			0.00543	MYC
ING3		other			0.00543	CDKN1A
PRDM2		transcription regulator			0.00543	MYC
NECAB3		other			0.00543	APP
JADE1		transcription regulator			0.00543	CDKN1A
ARCN1		other			0.00543	APP
RARRES1		other			0.00543	GRK5
RXFP1		g-protein coupled receptor			0.00543	ACTA2
ITM2C		other			0.00543	APP
UBE2E1		enzyme			0.00543	CDKN1A
PPP2R3A		phosphatase			0.00543	MYC
PAK3		kinase			0.00543	APP
ZBTB14		transcription regulator			0.00543	MYC
RPS20		other			0.00543	MYC
SHC3		kinase			0.00543	APP
CNTNAP1		other			0.00543	APP
RPL21		other			0.00543	MYC
EGFR		kinase		0.942	0.00544	ACTA2,AREG,CDKN1A,DDIT3,EGF,MYC,SLC7A11	37 (15)
LONP1		peptidase			0.00556	ALDH1L2,GPT2,MTHFD2
KLF6		transcription regulator			0.00556	CDKN1A,ENG,MYC
Jnk		group		1.98	0.00558	ACTA2,APP,DDIT3,MYC,SESN2	44 (16)
ERK1/2		group		0.616	0.00559	AREG,CDKN1A,DDIT3,GAD1,GRK5,MYC	29 (10)
ZBTB16		transcription regulator		-0.152	0.00569	CD81,CDKN1A,F13A1,MYC
SMAD7		transcription regulator			0.00569	ACTA2,AREG,CDKN1A,MYC	32 (15)
EBF1		transcription regulator			0.00569	EIF4EBP1,PCK2,RASGRF2,SHC4
Collagen type IV		complex			0.00573	ACTA2,MYC	34 (12)
PYCARD		transcription regulator			0.00573	ACTA2,CDKN1A	11 (7)
mir-19		microrna			0.00573	CDKN1A,FZD4
SIN3B		transcription regulator			0.00573	DDIT3,MYC
PDGFC		growth factor			0.00573	ACTA2,MYC
CTNNB1		transcription regulator		1.475	0.00575	ACTA2,ALDH1A3,APP,CDKN1A,DDIT3,F13A1,GAD1,MYC,SEMA3C,SLC1A5	43 (15)
YBX1		transcription regulator			0.0058	ACTA2,CDKN1A,SV2C	12 (7)
TBP		transcription regulator			0.0058	ASNS,CDKN1A,MYC
HIF1A		transcription regulator	Activated	2.421	0.0059	ACTA2,ASNS,CDKN1A,ENG,MYC,SESN2,TRIM66	37 (11)
TNF		cytokine		1.432	0.00605	ABTB2,ACTA2,ALDH1A3,APP,CDKN1A,DDIT3,EDNRB,ENG,ETV5,GPD2,LYVE1,MYC,PCK2,PHGDH,SEMA3C,SERPINF1,SLC1A4,SLC2A2	49 (15)
Vegf		group		0.563	0.0061	ACTA2,ASNS,DDIT3,ETV5,GRK5,LYVE1,MYC,Sult1d1	49 (18)
ATN1		transcription regulator			0.00616	GAD1,GRK5,ST8SIA5,VSNL1
FGF4		growth factor			0.00629	CDKN1A,HMGCS1
H2AFX		transcription regulator			0.00629	MYC,SLC7A11
SKI		transcription regulator			0.00629	ACTA2,CDKN1A	11 (7)
HEY1		transcription regulator			0.00629	ACTA2,CDKN1A
FGF7		growth factor			0.00629	CDKN1A,ETV5,S100A10
SYVN1		transporter		0.762	0.00649	APP,BCAT1,SLC1A5,SLC7A5
TERT		enzyme			0.00665	ALDH1A3,ASNS,CDKN1A,MYC	19 (5)
NKX2-3		transcription regulator	Activated	2.236	0.00678	ACTA2,ASNS,DDX60,PHGDH,PSAT1
CDKN1A	3.065	kinase		0.688	0.00678	ACTA2,APP,CDKN1A,MYC,PHGDH	39 (13)
E2F5		transcription regulator			0.00686	CDKN1A,MYC
ZBTB7A		transcription regulator			0.00686	CDKN1A,MYC	30 (6)
VAV3		cytokine			0.00686	AREG,EGF
Il3		cytokine			0.00708	ATF5,CDKN1A,MYC	43 (13)
Ins1		other		0.909	0.00717	CDKN1A,DDIT3,EIF4EBP1,HMGCS1,MYC,SLC2A2	42 (13)
SREBF2		transcription regulator			0.00735	CAMK1D,CDKN1A,HMGCS1	6 (2)
GRHL2		transcription regulator			0.00746	MYC,SEMA3C
MTA2		transcription regulator			0.00746	CDKN1A,MYC
VAV2		transcription regulator			0.00746	AREG,EGF	27 (7)
RARA		ligand-dependent nuclear receptor		-1.633	0.00761	AASS,ATF5,CDKN1A,MYC,SLC2A2,SLC7A11	10 (2)
ACOX1		enzyme	Inhibited	-2	0.00791	CDKN1A,DDIT3,NUPR1,TRIB3
calpain		complex			0.00808	APP,DDIT3	37 (7)
Smad		complex			0.00808	CDKN1A,MYC	25 (7)
CDC73		other			0.00808	APP,MYC
CX3CR1		g-protein coupled receptor			0.00808	APP,SLC2A2
SPRY2		other			0.00808	CDKN1A,ETV5
PF4		cytokine			0.00808	ACTA2,CDKN1A	32 (7)
Notch		group			0.00852	ACTA2,CDKN1A,MYC	30 (14)
DNMT1		enzyme			0.00852	CDKN1A,MYC,SLC7A11	27 (12)
DLL4		other			0.00872	ACTA2,LYVE1
NCL		other			0.00872	CDKN1A,MYC	11 (3)
PSMD10		transcription regulator			0.00872	CDKN1A,EIF4EBP1
PROX1		transcription regulator			0.00872	LYVE1,PCK2
SMAD3		transcription regulator		1.347	0.00905	ACTA2,AREG,CDKN1A,ENG,MYC	52 (17)
IFNA2		cytokine		-0.625	0.00905	ATF5,CDKN1A,DDX60,HMGCS1,MYC
FOXA1		transcription regulator			0.00931	ACTA2,DCX,MYC,UST
WT1		transcription regulator		0.768	0.00937	AREG,ASNS,CDKN1A,MYC,PCK2	13 (3)
ACTL6A		other			0.00938	CDKN1A,MYC
miR-26a-5p (and other miRNAs w/seed UCAAGUA)		mature microrna			0.00938	CDKN1A,MYC
USP7		peptidase			0.00938	CDKN1A,SLC2A2
CSF1R		kinase			0.00938	CDKN1A,MYC	20 (7)
NOX4		enzyme			0.00938	CDKN1A,CTH
NR1I2		ligand-dependent nuclear receptor		0	0.00952	CDKN1A,CTH,HMGCS1,Sult1d1
let-7a-5p (and other miRNAs w/seed GAGGUAG)		mature microrna		-1.926	0.00952	ACTA2,DOCK5,MYC,SLC1A4
TGFA		growth factor			0.00978	AREG,CDKN1A,S100A10
miR-92a-3p (and other miRNAs w/seed AUUGCAC)		mature microrna			0.0101	CDKN1A,VSNL1
NF2		other			0.0101	CDKN1A,MYC
PRLR		transmembrane receptor			0.0101	CDKN1A,MYC
MTPN		transcription regulator			0.0101	ENG,MYC,S100A10
AHR		ligand-dependent nuclear receptor		0.172	0.0101	ACTA2,APP,AREG,CDKN1A,MYC,SLC1A4
HNRNPK		transcription regulator			0.0108	CDKN1A,MYC
ARHGEF12		other			0.0108	ACTA2
WDR82		other			0.0108	CDKN1A
Cd33		other			0.0108	APP
USP42		peptidase			0.0108	CDKN1A
SLC5A1		transporter			0.0108	SLC2A2
RBMS3		other			0.0108	MYC
NSA2		other			0.0108	CDKN1A
RER1		other			0.0108	APP
RTN3		other			0.0108	APP
MAGEA2/MAGEA2B		other			0.0108	CDKN1A
SLC9A6		transporter			0.0108	APP
RPRD1B		other			0.0108	MYC
RTN2		other			0.0108	APP
BCAS3		other			0.0108	MYC
GSTK1		enzyme			0.0108	DDIT3
ZBTB49		other			0.0108	CDKN1A
RNF126		enzyme			0.0108	CDKN1A
NAT8		transcription regulator			0.0108	APP
WDR13		other			0.0108	CDKN1A
ZDHHC7		enzyme			0.0108	APP
DHCR24		enzyme			0.0108	APP
NCEH1		enzyme			0.0108	DDIT3
Gm-Csf Receptor		complex			0.0108	MYC
Importin alpha		group			0.0108	CDKN1A
ACER3		enzyme			0.0108	CDKN1A
EIF4F		complex			0.0108	MYC
OMG		g-protein coupled receptor			0.0108	MYC
BACE1-AS		other			0.0108	APP
NOSIP		other			0.0108	MYC
GPC3		other			0.0108	MYC
SPON1		other			0.0108	APP
ACTC1		enzyme			0.0108	ACTA2
CSDE1		enzyme			0.0108	MYC
SLC11A2		transporter			0.0108	APP
LGALS8		other			0.0108	CDKN1A
HPGD		enzyme			0.0108	CDKN1A
Abcb1b		transporter			0.0108	APP
APBA1		transporter			0.0108	APP
PTPA		phosphatase			0.0108	MYC
AMD1		enzyme			0.0108	MYC
ARID5B		transcription regulator			0.0108	ACTA2
CNBP		transcription regulator			0.0108	MYC
STAM		other			0.0108	MYC
miR-185-3p (and other miRNAs w/seed GGGGCUG)		mature microrna			0.0108	MYC
miR-188-3p (miRNAs w/seed UCCCACA)		mature microrna			0.0108	APP
miR-501-3p (and other miRNAs w/seed AUGCACC)		mature microrna			0.0108	GAD1
mir-383		microrna			0.0108	MYC
ELAC2		enzyme			0.0108	CDKN1A
SALL2		transcription regulator			0.0108	CDKN1A
CENPX		other			0.0108	MYC
ECE1		peptidase			0.0108	APP
TOP3A		enzyme			0.0108	CDKN1A
RPL15		other			0.0108	MYC
IDE		peptidase			0.0108	APP
MAGEA4		other			0.0108	CDKN1A
POLDIP3		other			0.0108	CDKN1A
TSPYL2		other			0.0108	CDKN1A
ITM2B		other			0.0108	APP
PEX2		other			0.0108	CDKN1A
NASP		other			0.0108	CDKN1A
CCT5		other			0.0108	CDKN1A
DST		other			0.0108	DDIT3
NME2		kinase			0.0108	MYC
RBM3		other			0.0108	DDIT3
WASHC1		other			0.0108	MYC
IMPACT		other			0.0108	DDIT3
SORL1		transporter			0.0108	APP
ING5		other			0.0108	CDKN1A
KHDRBS2		other			0.0108	CDKN1A
MTHFR		enzyme			0.0108	APP
RPA2		other			0.0108	MYC
BIN1		other			0.0108	APP
GALR2		g-protein coupled receptor			0.0108	CDKN1A
STAM2		other			0.0108	MYC
STAMBP		enzyme			0.0108	MYC
PCBP4		other			0.0108	CDKN1A
ONECUT2		transcription regulator			0.0108	SYTL4
GJD2		transporter			0.0108	DDIT3
CGGBP1		transcription regulator			0.0108	CDKN1A
PICALM		other			0.0108	APP
PPP2R5A		phosphatase			0.0108	MYC
AZIN1		enzyme			0.0108	ACTA2
FAM103A1		other			0.0108	MYC
Cops2		transcription regulator			0.0108	CDKN1A
Usp17la (includes others)		peptidase			0.0108	MYC
NAT8B		enzyme			0.0108	APP
S100A11		other			0.0108	CDKN1A
SNRPA		other			0.0108	APP
DUOX2		enzyme			0.0108	CDKN1A
NGB		transporter			0.0108	APP
ZFYVE16		transporter			0.0108	CDKN1A
AGT		growth factor		0.886	0.0111	ACTA2,CDKN1A,EDNRB,ENG,GRK5,HMGCS1,MYC
FGF19		growth factor			0.0111	AREG,NNAT,SLC2A2
STAT1		transcription regulator		-0.516	0.0113	ALDH1A3,CDKN1A,DDX60,MYC,S100A10,SLC2A2
KMT2A		transcription regulator			0.0115	ABTB2,CDKN1A,MYC
PRKG1		kinase			0.0115	ACTA2,CDKN1A
ARRB2		other			0.0115	GRK5,MYC
CLU		other			0.0115	APP,CDKN1A
PDPK1		kinase			0.0115	CDKN1A,MYC
PLAT		peptidase			0.0115	DDIT3,MYC
EIF2AK2		kinase			0.0119	CDKN1A,DDIT3,MYC
MYOC		other			0.0122	DDIT3,SESN2,SLC7A11
MAX		transcription regulator			0.0122	CDKN1A,DDIT3,MYC
mir-122		microrna			0.0122	MTHFD2,RCC2,SLC1A5
caspase		group			0.0123	APP,CDKN1A
NCF1		enzyme			0.0123	ACTA2,CDKN1A
Secretase gamma		complex			0.0123	APP,MYC
ALOX5		enzyme			0.0123	CDKN1A,MYC
mir-150		microrna			0.0123	ACTA2,FZD4
HOXC8		transcription regulator			0.0123	APP,SERPINF1
IFRD1		other			0.0123	CTH,MYC
VTN		other			0.0123	CDKN1A,S100A10
Hmgn3		other			0.0123	SLC2A2,TRIB3
PSEN2		peptidase			0.0126	APP,C1QA,FZD4
ATF2		transcription regulator			0.0126	ASNS,DDIT3,NUPR1
PPARG		ligand-dependent nuclear receptor		-0.062	0.0128	ACTA2,APP,CDKN1A,EIF4EBP1,PCK2,SLC2A2,TRIB3
RASSF1		other			0.013	AREG,CDKN1A,MYC
SFRP1		transmembrane receptor			0.013	ACTA2,APP
ZBTB17		transcription regulator			0.013	CDKN1A,DDIT3
IgG		complex		-0.577	0.0131	APP,CDKN1A,DDIT3,MYC
IGF2		growth factor			0.0134	AREG,CDKN1A,DDIT3,MYC
ASCL1		transcription regulator			0.0138	CDKN1A,DCX,GAD1
Rar		group			0.0138	CDKN1A,SERPINF1
HLX		transcription regulator			0.0138	AREG,MYC
FBXW7		transcription regulator			0.0138	APP,MYC
TNC		other			0.0138	CDKN1A,MYC
PTTG1		transcription regulator			0.0138	CDKN1A,MYC
LEPR		transmembrane receptor			0.0139	ACTA2,EIF4EBP1,SLC2A2,VGF
F2		peptidase		1.443	0.014	ACTA2,CDKN1A,DOCK10,EDNRB,MYC
PIAS1		transcription regulator			0.0146	ACTA2,CDKN1A
CDK2		kinase			0.0146	CDKN1A,MYC
IKBKB		kinase		-0.728	0.0151	Cald1,CDKN1A,GRK5,MYC,SEMA3C
TFDP1		transcription regulator			0.0155	CDKN1A,MYC
IGFBP3		other			0.0155	CDKN1A,LYVE1
Insulin		group		0.031	0.0156	APP,CDKN1A,CTH,MYC,SLC2A2,VGF
AKT1		kinase		1.679	0.0158	ACTA2,CDKN1A,HMGCS1,MYC,SERPINF1
SOD2		enzyme			0.0159	CDKN1A,DDIT3,MYC
CEBPD		transcription regulator			0.0159	ASNS,DDIT3,MYC
Calcineurin B		group			0.0162	CDKN1A
Smad1/5/8		group			0.0162	CDKN1A
Beta Secretase		group			0.0162	APP
TFIIH		complex			0.0162	CDKN1A
PLC gamma		group			0.0162	MYC
CCDC88B		enzyme			0.0162	DDIT3
SMPD3		enzyme			0.0162	APP
KDM4D		enzyme			0.0162	CDKN1A
ZNF346		other			0.0162	CDKN1A
CERS5		transcription regulator			0.0162	DDIT3
RFFL		enzyme			0.0162	CDKN1A
TTC5		other			0.0162	CDKN1A
PTPMT1		phosphatase			0.0162	CDKN1A
FAM129B		transcription regulator			0.0162	MYC
HIST1H1D		other			0.0162	MYC
ZNF451		enzyme			0.0162	CDKN1A
EDEM1		enzyme			0.0162	DDIT3
PYHIN1		other			0.0162	CDKN1A
LHX5		transcription regulator			0.0162	GAD1
ZNF300		other			0.0162	MYC
N4BP2L2		transcription regulator			0.0162	CDKN1A
CTBP1-AS2		other			0.0162	CDKN1A
EXOC3L1		other			0.0162	CDKN1A
OLA1		enzyme			0.0162	CDKN1A
XRN2		enzyme			0.0162	MYC
RSPO1		other			0.0162	MYC
CSNK1E		kinase			0.0162	APP
YEATS4		transcription regulator			0.0162	CDKN1A
RNF144B		enzyme			0.0162	CDKN1A
LPXN		transcription regulator			0.0162	ACTA2
PMEPA1		other			0.0162	CDKN1A
ANXA5		transporter			0.0162	CDKN1A
DHPS		enzyme			0.0162	DDIT3
MCRS1		other			0.0162	CDKN1A
U2AF2		other			0.0162	CDKN1A
BPTF		transcription regulator			0.0162	MYC
CUL4A		other			0.0162	CDKN1A
miR-2682-5p (and other miRNAs w/seed AGGCAGU)		mature microrna			0.0162	MYC
RPS14		translation regulator			0.0162	MYC
ASS1		enzyme			0.0162	MYC
FOXO6		transcription regulator			0.0162	MYC
MYH11		other			0.0162	ACTA2
NCOA5		other			0.0162	MYC
DOK2		other			0.0162	MYC
MGAT4A		enzyme			0.0162	SLC2A2
LCOR		transcription regulator			0.0162	CDKN1A
HSPA4		other			0.0162	APP
EIF2B1		translation regulator			0.0162	DDIT3
AHNAK		other			0.0162	MYC
SRCAP		transcription regulator			0.0162	CDKN1A
EID2		other			0.0162	CDKN1A
MED26		transcription regulator			0.0162	MYC
STRAP		other			0.0162	MYC
H3F3A/H3F3B		other			0.0162	CDKN1A
TOR2A		other			0.0162	MYC
TRAF7		enzyme			0.0162	MYC
SYF2		other			0.0162	CDKN1A
RGS3		other			0.0162	MYC
KRT5		other			0.0162	SERPINF1
LYPD6		other			0.0162	FZD4
TNKS		enzyme			0.0162	MYC
SPAG9		other			0.0162	CDKN1A
KLF7		transcription regulator			0.0162	CDKN1A
BLM		enzyme			0.0162	CDKN1A
AP2A2		transporter			0.0162	CDKN1A
ELOA		transcription regulator			0.0162	CDKN1A
HES6		transcription regulator			0.0162	CDKN1A
ITGB8		other			0.0162	CDKN1A
VDAC1		ion channel			0.0162	APP
PLK3		kinase			0.0162	CDKN1A
RACGAP1		transporter			0.0162	CDKN1A
BUB3		other			0.0162	CDKN1A
HSPH1		other			0.0162	MYC
TCP1		other			0.0162	CDKN1A
EEF1A1		translation regulator			0.0162	MYC
KLF16		other			0.0162	CDKN1A
TOP2A		enzyme			0.0162	MYC
RPL23A		other			0.0162	MYC
ATAD2		enzyme			0.0162	MYC
BCKDHA		enzyme			0.0162	MYC
UIMC1		other			0.0162	CDKN1A
SNRNP70		other			0.0162	APP
WTAP		other			0.0162	AREG
GTF2B		transcription regulator			0.0163	ASNS,CDKN1A
MMP2		peptidase			0.0163	CDKN1A,MYC
STUB1		enzyme			0.0163	ACTA2,CDKN1A
ELAVL1		other			0.0168	CDKN1A,MYC,SLC7A11
POR		enzyme			0.0168	ASNS,ATF5,CYP39A1,HMGCS1
PLAUR		transmembrane receptor			0.0172	ACTA2,MYC
TSC1		other			0.0172	DDIT3,FAM129A
ABL1		kinase			0.0172	CDKN1A,MYC
DNMT3B		enzyme			0.0172	CDKN1A,MYC,SLC7A11
PGR		ligand-dependent nuclear receptor		1.969	0.0174	ALDH1A3,AREG,CDKN1A,MYC,SLC7A5
DICER1		enzyme			0.0174	CDKN1A,ENG,MYC,SEMA3C,SERPINF1
MET		kinase			0.0177	AREG,CDKN1A,MYC
SMARCA4		transcription regulator		1.841	0.0177	ACTA2,ALDH1A3,AP1S2,AREG,ASNS,CDKN1A,FUT1,MYC
SUMO3		other			0.0181	APP,CTH
Rxr		group			0.0181	CDKN1A,MYC,SERPINF1
Hsp27		group			0.019	CDKN1A,EIF4EBP1
ATP7B		transporter			0.019	APP,HMGCS1
NEUROD1		transcription regulator			0.019	CDKN1A,DCX
CARM1		transcription regulator			0.019	CDKN1A,MYC
ENG	1.593	transmembrane receptor			0.019	ACTA2,MYC
INHA		growth factor			0.0191	ACTA2,AREG,MYC
Mapk		group			0.0196	APP,CDKN1A,MYC
KAT5		transcription regulator			0.0196	CDKN1A,MYC,PCDH15
H2AFY		other			0.0199	ALDH1A3,CDKN1A
IRS2		enzyme			0.0199	MYC,SLC2A2
RUVBL1		transcription regulator			0.0199	SESN2,TRIM66
CREBBP		transcription regulator			0.0199	CDKN1A,DCX,HMGCS1,MYC,SLC7A11,SMOC1
TGFB3		growth factor			0.0201	ACTA2,CDKN1A,ENG
NUPR1	3.837	transcription regulator	Activated	2.449	0.0201	AREG,DDIT3,EPHA7,MYC,NUPR1,SESN2,TRIB3
INHBA		growth factor		1.224	0.0204	ACTA2,CDKN1A,F13A1,SLC2A2
EPO		cytokine		1.969	0.0208	CDKN1A,DDIT3,MYC,NUPR1,RCC2
MYBL2		transcription regulator			0.0209	MYC,SLC1A5
APP	1.654	other		0.091	0.0211	ACTA2,APP,CRYL1,DCX,ENG,MYC,NNAT,SERPINF1,SLC7A11,VSNL1
RORA		ligand-dependent nuclear receptor			0.0211	ASNS,Cald1,CYP39A1,Sult1d1
FOXA2		transcription regulator			0.0211	ACTA2,DCX,SLC2A2,UST
STAT6		transcription regulator			0.0213	AREG,CDKN1A,GNA14,S100A10,SERPINF1
RNASEH2B		enzyme			0.0215	CDKN1A
NPSR1		g-protein coupled receptor			0.0215	MYC
SNX27		other			0.0215	APP
CINP		other			0.0215	CDKN1A
NPAS4		transcription regulator			0.0215	DDIT3
GPR65		g-protein coupled receptor			0.0215	MYC
ATF6B		transcription regulator			0.0215	DDIT3
GNL3L		other			0.0215	CDKN1A
DNAJB4		other			0.0215	CDKN1A
CYP26B1		enzyme			0.0215	ATF5
USE1		other			0.0215	DDIT3
GLIPR2		other			0.0215	ACTA2
USP22		peptidase			0.0215	CDKN1A
MUCL1		other			0.0215	CDKN1A
DACT3		other			0.0215	MYC
APH-1		group			0.0215	APP
K Channel		complex			0.0215	CDKN1A
CDCA2		other			0.0215	CDKN1A
P-TEFb		complex			0.0215	CDKN1A
Nc2		complex			0.0215	MYC
ZFYVE9		peptidase			0.0215	ACTA2
TTR		transporter			0.0215	APP
CDC25B		phosphatase			0.0215	MYC
CELA2A		peptidase			0.0215	CDKN1A
GGA1		transporter			0.0215	APP
G0S2		other			0.0215	MYC
GRPR		g-protein coupled receptor			0.0215	CDKN1A
BCAP31		transporter			0.0215	CD81
TOPORS		enzyme			0.0215	CDKN1A
CALCR		g-protein coupled receptor			0.0215	CDKN1A
SNX17		transporter			0.0215	APP
SYNM		other			0.0215	CDKN1A
LIMK1		kinase			0.0215	MYC
HAS3		enzyme			0.0215	CDKN1A
FLOT1		other			0.0215	CDKN1A
BOP1		other			0.0215	CDKN1A
GGA3		transporter			0.0215	APP
IL17B		cytokine			0.0215	CDKN1A
AP2A1		transporter			0.0215	APP
RTN4R		transmembrane receptor			0.0215	APP
PRKAR2A		kinase			0.0215	CDKN1A
KLK6		peptidase			0.0215	APP
TACC3		other			0.0215	CDKN1A
ATP2A1		transporter			0.0215	DDIT3
SLC37A4		transporter			0.0215	DDIT3
SNRK		kinase			0.0215	MYC
FOXH1		transcription regulator			0.0215	ALDH1A3
MME		peptidase			0.0215	APP
LETMD1		other			0.0215	CDKN1A
DNM1		enzyme			0.0215	APP
PLAC8		other			0.0215	CDKN1A
SLC9A3R2		transporter			0.0215	MYC
VPS26A		transporter			0.0215	APP
ACP1		phosphatase			0.0215	MYC
MYH9		enzyme			0.0215	MYC
NOC2L		transcription regulator			0.0215	CDKN1A
MAD1L1		other			0.0215	MYC
RRM2B		enzyme			0.0215	CDKN1A
PRKAA2		kinase			0.0216	ACTA2,CDKN1A,DDIT3
DMP1		other			0.0218	F13A1,SLC6A9
TFRC		transporter			0.0218	CDKN1A,F13A1
EHMT2		transcription regulator			0.0218	CDKN1A,MYC
RELA		transcription regulator		0.132	0.0225	ACTA2,APP,CDKN1A,DDIT3,GRK5,MYC
EDN1		cytokine		1.973	0.0225	ACTA2,AREG,EDNRB,MYC
LIF		cytokine			0.0225	ACTA2,AREG,CDKN1A,MYC
HES3		other			0.0228	NRSN1,OR2T4
mir-145		microrna			0.0228	ACTA2,MYC
RARG		ligand-dependent nuclear receptor			0.0228	AREG,MYC
PAX3		transcription regulator			0.0229	APP,ASNS,CDKN1A,PHGDH
TSC2		other			0.0232	CDKN1A,DDIT3,FAM129A
ICAM1		transmembrane receptor			0.0238	ACTA2,MYC
GHR		transmembrane receptor			0.0238	CDKN1A,MYC
BMP2		growth factor		1.376	0.0241	ACTA2,CDKN1A,EGF,MYC
CDKN1B		kinase			0.0248	CDKN1A,MYC,TENM4
CD44		other			0.0248	ACTA2,CDKN1A,DDIT3,MYC
Collagen(s)		complex			0.0248	DDIT3,PSAT1
HSPA5		enzyme			0.0248	APP,DDIT3
PPARD		ligand-dependent nuclear receptor		-1.982	0.0252	ACTA2,C1QA,GPD2,SLC2A2
XBP1		transcription regulator			0.0252	APP,DDIT3,MYC,STARD5
PRKCA		kinase			0.0254	APP,CDKN1A,MYC
OSM		cytokine		1.078	0.0258	ACTA2,ASNS,CDKN1A,EIF4EBP1,LMO1,MYC,SEL1L
HNF1B		transcription regulator			0.0265	SEMA3C,SLC2A2,Sult1d1
TPPP2		other			0.0268	CDKN1A
MNK1/2		group			0.0268	MYC
Cpla2		group			0.0268	MYC
DESI2		other			0.0268	CDKN1A
ZMIZ1		other			0.0268	MYC
RASSF6		other			0.0268	CDKN1A
TRIM29		transcription regulator			0.0268	CDKN1A
BCAS2		other			0.0268	CDKN1A
SSBP2		transcription regulator			0.0268	MYC
SGMS1		enzyme			0.0268	APP
ZMIZ2		transcription regulator			0.0268	MYC
G6PC3		phosphatase			0.0268	DDIT3
TRIM71		enzyme			0.0268	MYC
Laminin2		complex			0.0268	ACTA2
PRPF19		enzyme			0.0268	CDKN1A
SULT2B1		enzyme			0.0268	MYC
IgG2b		complex			0.0268	APP
GRAP2		other			0.0268	MYC
FGF13		growth factor			0.0268	CDKN1A
ERN2		kinase			0.0268	DDIT3
PUF60		other			0.0268	MYC
RALB		enzyme			0.0268	CDKN1A
NUP98		transporter			0.0268	CDKN1A
NCK2		kinase			0.0268	DDIT3
RNF34		enzyme			0.0268	CDKN1A
miR-431-3p (miRNAs w/seed AGGUCGU)		mature microrna			0.0268	CD81
PPP1R13B		phosphatase			0.0268	CDKN1A
AMBN		growth factor			0.0268	CDKN1A
APAF1		other			0.0268	DDIT3
RHOH		enzyme			0.0268	CDKN1A
KAT7		enzyme			0.0268	CDKN1A
RBM14		transcription regulator			0.0268	MYC
WFS1		enzyme			0.0268	DDIT3
ALDH3A1		enzyme			0.0268	CDKN1A
PTGIS		enzyme			0.0268	DDIT3
OTUD7B		peptidase			0.0268	ACTA2
BRCA2		transcription regulator			0.0268	CDKN1A
BRF1		transcription regulator			0.0268	CDKN1A
TRIM33		transcription regulator			0.0268	MYC
SH2B2		other			0.0268	MYC
FKBP1A		enzyme			0.0268	CDKN1A
TDG		enzyme			0.0268	MYC
ECT2		other			0.0268	CDKN1A
RAP1A		enzyme			0.0268	CDKN1A
HIVEP2		transcription regulator			0.0268	MYC
SPRY4		other			0.0268	ETV5
RSU1		other			0.0268	CDKN1A
YY2		other			0.0268	MYC
Hist1h1e		other			0.0268	MYC
FOXO4		transcription regulator			0.0269	CDKN1A,HMGCS1
AVP		other			0.0269	ACTA2,EDNRB
SRSF2		transcription regulator			0.0269	APP,DDIT3
Alpha catenin		group			0.0271	AREG,ENG,MYC
IL10RA		transmembrane receptor		0.447	0.0271	CTH,EDNRB,EGF,F13A1,SLC7A11
CHUK		kinase		1.98	0.0273	CDKN1A,EGF,MYC,SEMA3C
Mek		group			0.0273	CDKN1A,ETV5,MYC,SEMA3C
BDNF		growth factor		-0.2	0.0274	APP,CDKN1A,S100A10,VGF,VSNL1
A2M		transporter			0.028	DDIT3,MYC
GPS2		transcription regulator			0.028	CDKN1A,MYC
Pkc(s)		group		-0.602	0.0289	APP,CDKN1A,DDIT3,SLC6A9
AURK		group			0.0291	CDKN1A,SESN2
LGALS1		other			0.0291	ACTA2,CDKN1A
ANLN		other			0.0291	CDKN1A,SESN2
THRA		ligand-dependent nuclear receptor			0.0301	APP,CDKN1A,ENG
PITX2		transcription regulator			0.0301	FZD4,GAD1,MYC
Hedgehog		group			0.0302	MYC,SLC2A2
MSTN		growth factor			0.0313	ACTA2,CDKN1A
LEP		growth factor		-0.212	0.032	ACTA2,APP,CDKN1A,MYC,SLC2A2,VGF
TGFBR		group			0.0321	ACTA2
SERCA		group			0.0321	MYC
CYP3A		group			0.0321	HMGCS1
MRE11		enzyme			0.0321	MYC
PADI4		enzyme			0.0321	CDKN1A
KLF17		transcription regulator			0.0321	CDKN1A
RASSF3		other			0.0321	CDKN1A
CACNA1C		ion channel			0.0321	S100A10
SPTAN1		other			0.0321	CDKN1A
RABGEF1		enzyme			0.0321	VGF
PRKACB		kinase			0.0321	MYC
H6PD		enzyme			0.0321	DDIT3
TCF21		transcription regulator			0.0321	CDKN1A
TFPI		other			0.0321	CDKN1A
CNGB3		ion channel			0.0321	DDIT3
RBBP4		enzyme			0.0321	MYC
CD33		other			0.0321	APP
HIST1H1C		other			0.0321	MYC
BCL2L12		other			0.0321	CDKN1A
SERPINA4		other			0.0321	MYC
ENO1		enzyme			0.0321	MYC
PDE3A		enzyme			0.0321	CDKN1A
EIF5A		translation regulator			0.0321	CDKN1A
MOV10L1		enzyme			0.0321	CDKN1A
ITGA9		other			0.0321	ACTA2
ATP2B2		transporter			0.0321	DDIT3
ERCC1		enzyme			0.0321	CDKN1A
MAGED1		transcription regulator			0.0321	CDKN1A
ETV3		transcription regulator			0.0321	MYC
PEBP4		other			0.0321	CDKN1A
USP11		peptidase			0.0321	CDKN1A
RPL11		other			0.0321	CDKN1A
TADA3		transcription regulator			0.0321	CDKN1A
DYNLL1		other			0.0321	CDKN1A
FSTL3		other			0.0321	CDKN1A
PAX4		transcription regulator			0.0321	MYC
CXXC5		other			0.0321	ACTA2
DDX3X		enzyme			0.0321	CDKN1A
MNX1		transcription regulator			0.0321	SLC2A2
SUPT5H		transcription regulator			0.0321	CDKN1A
ERBIN		other			0.0321	CDKN1A
STX2		transporter			0.0321	MYC
RPL22		other			0.0321	CDKN1A
WRN		enzyme			0.0321	CDKN1A
ITGA11		other			0.0321	ACTA2
FUBP1		transcription regulator			0.0321	MYC
EHMT1		transcription regulator			0.0321	CDKN1A
ERF		transcription regulator			0.0321	MYC
CDH13		other			0.0321	CDKN1A
SF1		transcription regulator			0.0321	ACTA2
Eda		other			0.0321	AREG
EDA		cytokine			0.0321	AREG
PAXIP1		other			0.0321	CDKN1A
ZYX		other			0.0321	Cald1
PTK2		kinase			0.0325	ACTA2,CDKN1A
DCN		other			0.0325	CDKN1A,ENG
mir-223		microrna			0.0326	ACTA2,EGF,HMGCS1
NRG1		growth factor			0.033	CDKN1A,DDIT3,GAD1,MYC
RUNX3		transcription regulator			0.0336	CDKN1A,MYC
SHC1		other			0.0336	CDKN1A,SHC4
CDK9		kinase			0.0336	CDKN1A,MYC
miR-34a-5p (and other miRNAs w/seed GGCAGUG)		mature microrna			0.0336	CDKN1A,MYC
NOTCH3		transcription regulator			0.0336	ACTA2,CDKN1A
PTGES		enzyme			0.0336	CDKN1A,MYC
IL1A		cytokine		1.941	0.0339	ALDH1A3,APP,CDKN1A,MYC
TCF3		transcription regulator		-0.412	0.0345	CDKN1A,EIF4EBP1,EPRS,MYC,SLC7A5
JUN		transcription regulator			0.0355	APP,ASNS,CDKN1A,LMO1,MYC,S100A10
CCND1		transcription regulator		0.728	0.0357	ALDH1A3,AREG,CDKN1A,MYC,NRSN1
PIM1		kinase			0.036	CDKN1A,MYC
SMAD4		transcription regulator			0.0363	AREG,CDKN1A,ENG,MYC
MAP2K7		kinase			0.0372	CDKN1A,MYC
TCF12		transcription regulator			0.0372	CDKN1A,VGF
AKIRIN2		other			0.0374	MYC
ABCA7		transporter			0.0374	APP
MED28		other			0.0374	ACTA2
APC (complex)		complex			0.0374	TRIB3
PDS5B		other			0.0374	MYC
sphingomyelinase		group			0.0374	MYC
PCM1		other			0.0374	CDKN1A
PKD2		ion channel			0.0374	CDKN1A
BAG6		enzyme			0.0374	CDKN1A
REV1		enzyme			0.0374	SESN2
HNRNPC		other			0.0374	MYC
AGR2		other			0.0374	AREG
SERPINA3		other			0.0374	APP
CCNA2		other			0.0374	CDKN1A
miR-494-3p (miRNAs w/seed GAAACAU)		mature microrna			0.0374	VSNL1
mir-204		microrna			0.0374	DDIT3
mir-224		microrna			0.0374	CDKN1A
PRTN3		peptidase			0.0374	CDKN1A
L1RE1		other			0.0374	MYC
DLC1		other			0.0374	S100A10
DUSP6		phosphatase			0.0374	CDKN1A
SLC22A1		transporter			0.0374	SLC2A2
IGFBP4		other			0.0374	ACTA2
MGLL		enzyme			0.0374	APP
TP53INP1		other			0.0374	CDKN1A
CLTC		other			0.0374	CDKN1A
CUL1		enzyme			0.0374	MYC
PPM1A		phosphatase			0.0374	CDKN1A
RAD9A		enzyme			0.0374	CDKN1A
DMTF1		transcription regulator			0.0374	CDKN1A
MLLT3		other			0.0374	MYC
SH2B1		other			0.0374	MYC
ITGB1BP1		transporter			0.0374	CDKN1A
MS4A1		other			0.0374	MYC
SNW1		transcription regulator			0.0374	CDKN1A
SLCO1B3		transporter			0.0374	CDKN1A
RBCK1		transcription regulator			0.0374	MYC
PPP5C		phosphatase			0.0374	CDKN1A
UBR5		enzyme			0.0374	CDKN1A
HIST1H3E		other			0.0374	VGF
CAPN2		peptidase			0.0374	DDIT3
PCBP1		translation regulator			0.0374	MYC
PSENEN		peptidase			0.0374	APP
POLR2A		enzyme			0.0384	CDKN1A,MYC
mir-17		microrna			0.0384	APP,CDKN1A
miR-145-5p (and other miRNAs w/seed UCCAGUU)		mature microrna			0.0384	ACTA2,MYC
Pka		complex			0.0387	AREG,CDKN1A,DDIT3
BMP4		growth factor			0.0394	ACTA2,CDKN1A,MYC
EIF4E		translation regulator			0.0394	CDKN1A,EIF4EBP1,MYC
MITF		transcription regulator			0.0404	EDNRB,INPP4B,SEMA3C,SERPINF1
miR-21-5p (and other miRNAs w/seed AGCUUAU)		mature microrna			0.0409	ACTA2,CDKN1A
MBD2		transcription regulator			0.0409	CDKN1A,NUPR1
ATF6		transcription regulator			0.0409	APP,DDIT3
PIN1		enzyme			0.0409	CDKN1A,MYC
SIN3A		transcription regulator			0.0409	DDIT3,MYC
CHD4		enzyme			0.0409	CDKN1A,SMOC1
RBPJ		transcription regulator			0.0416	CDKN1A,EGF,MYC
Tgf beta		group		1.081	0.0419	ACTA2,CDKN1A,ENG,MYC
TNFRSF8		transmembrane receptor			0.0422	CDKN1A,MYC
LEF1		transcription regulator			0.0422	CDKN1A,MYC
EGLN1		enzyme			0.0422	AREG,MYC
F2RL1		g-protein coupled receptor			0.0422	ACTA2,AREG
MUC1		other			0.0422	MYC,PYCR1
CERS6		transcription regulator			0.0426	DDIT3
MFN2		enzyme			0.0426	DDIT3
LIN9		other			0.0426	CDKN1A
TRPC4AP		transporter			0.0426	APP
DUOXA1		other			0.0426	DCX
ZNF382		transcription regulator			0.0426	MYC
LTBP4		growth factor			0.0426	MYC
Presenilin		group			0.0426	APP
IL-2R		complex			0.0426	PHGDH
Lefty		group			0.0426	CDKN1A
STAG1		transcription regulator			0.0426	MYC
CSNK2B		kinase			0.0426	MYC
FANCA		other			0.0426	CDKN1A
GADD45G		other			0.0426	CDKN1A
GRK5	-1.775	kinase			0.0426	APP
BANP		other			0.0426	CDKN1A
CTNNBIP1		other			0.0426	CDKN1A
CBX1		transcription regulator			0.0426	CDKN1A
CAV3		enzyme			0.0426	CDKN1A
CXCR1		g-protein coupled receptor			0.0426	APP
RGS19		other			0.0426	MYC
NUAK1		kinase			0.0426	CDKN1A
MTBP		other			0.0426	CDKN1A
HBP1		transcription regulator			0.0426	CDKN1A
WNT5B		other			0.0426	ACTA2
HAS2		enzyme			0.0426	ACTA2
KSR1		kinase			0.0426	MYC
BACE1		peptidase			0.0426	APP
ATF7		transcription regulator			0.0426	DDIT3
WNT7B		other			0.0426	MYC
TSG101		transcription regulator			0.0426	CDKN1A
NRP1		transmembrane receptor			0.0426	ACTA2
FBXO2		enzyme			0.0426	APP
PEMT		enzyme			0.0426	DDIT3
TNFAIP6		other			0.0426	ACTA2
ATXN3		peptidase			0.0426	APP
AQP7		transporter			0.0426	MYC
TNRC6A		other			0.0426	CDKN1A
DIABLO		other			0.0426	CDKN1A
ACTG1		other			0.0426	ACTA2
NDP		growth factor			0.0426	SERPINF1
miR-17-5p (and other miRNAs w/seed AAAGUGC)		mature microrna			0.0434	APP,CDKN1A
TFAP2C		transcription regulator			0.0434	CDKN1A,MYC
SIRT1		transcription regulator			0.0436	CDKN1A,MYC,PCK2,SLC7A11
UCHL1		peptidase			0.0447	CDKN1A,DOCK10
NOTCH1		transcription regulator		1.034	0.0458	ACTA2,CDKN1A,LYVE1,MYC
Igm		complex			0.046	CDKN1A,MYC
C3		peptidase			0.0473	ACTA2,APP
HMGA1		transcription regulator			0.0476	ACTA2,DDIT3,MYC
APC/APC2		group			0.0478	CDKN1A
Ck2		complex			0.0478	MYC
APH1A		peptidase			0.0478	APP
MELK		kinase			0.0478	CDKN1A
AFF4		transcription regulator			0.0478	MYC
MEMO1		other			0.0478	MYC
PBRM1		other			0.0478	CDKN1A
TIP60		complex			0.0478	CDKN1A
TRG		other			0.0478	AREG
DCLK1		kinase			0.0478	MYC
PI3		other			0.0478	ACTA2
SHOX		transcription regulator			0.0478	CDKN1A
PLA2G6		enzyme			0.0478	DDIT3
FANCD2		other			0.0478	CDKN1A
Ighg2b		other			0.0478	APP
SLC2A1		transporter			0.0478	SLC1A5
NELFA		other			0.0478	CDKN1A
USP19		peptidase			0.0478	DDIT3
CAMK2G		kinase			0.0478	CDKN1A
PKN1		kinase			0.0478	ACTA2
NPC1L1		transporter			0.0478	HMGCS1
UACA		other			0.0478	DDIT3
YBX3		transcription regulator			0.0478	MYC
TAF6		transcription regulator			0.0478	CDKN1A
MPL		transmembrane receptor			0.0478	MYC
DDB1		other			0.0478	CDKN1A
WNT3		other			0.0478	CDKN1A
RECK		other			0.0478	CDKN1A
SIAH1		enzyme			0.0478	CDKN1A
TLR4		transmembrane receptor			0.048	APP,AREG,EGF,MYC,SLC7A11
YY1		transcription regulator			0.0486	ACTA2,CDKN1A,MYC,NNAT
RABL6		other			0.0487	MYC,SEL1L
ID1		transcription regulator			0.0487	CDKN1A,MYC
TSH		complex			0.0487	CDKN1A,MYC
NEUROG1		transcription regulator			0.0487	DCX,SERPINF1
IL4		cytokine		1.941	0.27	ACTA2,CDKN1A,F13A1,GNA14,MYC,S100A10
IL6		cytokine		1.92	0.355	APP,AREG,CDKN1A,MYC,SLC2A2

## Sheet: Supp Table 4
Table S4
Proteins identified by SILAC
highlighted proteins (p<0.0072)
Protein names	Gene names	bfurKO	control	Linear bfurKO/control	log2 bfurKO/control	t-test	peptides	unique peptides	protein IDs
Bifunctional glutamate/proline--tRNA ligase;Glutamate--tRNA ligase;Proline--tRNA ligase	Eprs	1.00329	0.751431	1.33517	0.417026	1.36198e-07	54	54	Q8CGC7;E9Q1B1
Serine hydroxymethyltransferase	Shmt2	0.321326	0.195069	1.64724	0.720053	5.88098e-07	23	22	Q9CZN7
Mitochondrial 10-formyltetrahydrofolate dehydrogenase	Aldh1l2	1.30421	0.345762	3.77199	1.91532	1.45559e-06	35	31	Q8K009;D3Z6B9
Farnesyl pyrophosphate synthase	Fdps	0.843924	1.1349	0.743611	-0.42738	1.53727e-06	7	7	Q4FJN9;Q920E5
Monofunctional C1-tetrahydrofolate synthase, mitochondrial	Mthfd1l	0.862754	0.596357	1.44671	0.532773	2.94944e-06	17	17	Q3V3R1
Microtubule-associated protein 4;Microtubule-associated protein	Map4;Mtap4	0.831665	0.596725	1.39372	0.478936	8.12026e-06	17	9	P27546;P27546-2;E9QPW8;P27546-3;E9PZ43;E9QKJ8;E9PWC0;P27546-4;F6V4Z1;F6XPV7
Pappalysin 2	Pappa2	1.73097	0.730211	2.37051	1.2452	1.34388e-05	13	13	E9PZ87;F6TFC9
14-3-3 protein eta	Ywhah	0.516667	0.622815	0.829567	-0.269569	2.53834e-05	17	12	P68510;E9Q4V8
Delta-1-pyrroline-5-carboxylate synthase;Glutamate 5-kinase;Gamma-glutamyl phosphate reductase	Aldh18a1	0.965178	0.579424	1.66575	0.736176	2.70265e-05	27	27	Q9Z110;Q9Z110-2;D3Z0B4;H3BLE8;H3BKJ8;H3BKK0
Protein Niban	Fam129a	5.00054	2.46381	2.0296	1.02119	2.80098e-05	5	5	Q3UW53;E9PYV4;D3Z233;D3YYZ9
Phosphoenolpyruvate carboxykinase [GTP], mitochondrial	Pck2	1.15056	0.684315	1.68133	0.749604	3.09115e-05	24	24	Q8BH04;Q3UGF0
Tyrosine--tRNA ligase, cytoplasmic	Yars	0.740715	0.563721	1.31397	0.393937	4.00848e-05	29	29	A2A7S7;Q91WQ3;F6VXZ2
Ras GTPase-activating-like protein IQGAP1	Iqgap1	1.2334	1.16026	1.06304	0.0881926	4.06359e-05	50	48	F6ZJB0;G3UW45;Q9JKF1;Q3UQP1
Glutamate dehydrogenase 1, mitochondrial	Glud1	1.95111	2.22598	0.876517	-0.190146	4.93083e-05	22	22	P26443;F7CFA5
Alanine--tRNA ligase, cytoplasmic	Aars	0.658451	0.437531	1.50492	0.589691	5.99018e-05	22	22	Q8BGQ7
D-3-phosphoglycerate dehydrogenase	Phgdh	0.655859	0.227515	2.88271	1.52742	7.6968e-05	17	17	Q61753;F6ZSB7;E9QAP9
StAR-related lipid transfer protein 5	Stard5	3.06203	1.48925	2.05609	1.0399	9.01675e-05	2	2	Q9EPQ7;D3YU00
Heterogeneous nuclear ribonucleoprotein A3	Hnrnpa3;Gm8991;Gm6793	0.755642	0.669434	1.12878	0.174761	0.000108843	23	2	Q0VG47;Q8BG05-2;E9Q7H5;B2RXM2
Enolase-phosphatase E1	Enoph1	1.26656	1.63157	0.776283	-0.365345	0.000129143	3	3	Q8BGB7;Q8BGB7-2
ATP-binding cassette sub-family F member 1	Abcf1	0.902958	0.747111	1.2086	0.273336	0.000161678	8	8	Q6P542
1,4-alpha-glucan-branching enzyme	Gbe1	1.26948	1.58715	0.799849	-0.322201	0.000164816	7	7	Q9D6Y9;G3UW30;F6ZHD8
Dihydropteridine reductase	Qdpr	0.595545	0.6671	0.892737	-0.163693	0.000165714	10	10	Q8BVI4;D3YWR7;D3Z1A1;D3Z099
Glyceraldehyde-3-phosphate dehydrogenase	Gapdh;Gm2606;Gm10358;Gm10481;Gm4609;Gm3839;Gm3222;Gm5559;Gm10291;Gm10327;Gm10293;Gm3200;Gm7293;Gm10566;Gm6316;Gm5507;Gm5069;Gm10290	0.789421	0.664733	1.18758	0.24802	0.000169879	19	10	D2KHZ9;E9PX42;P16858;E9Q5U3;E9Q9E5;E9Q1S8;E9QAC7;F6ZQM8;E9PX72;D3YUV0;E9PZL2;E9Q0E3;E9PXL6;F8WJL5;D3YYI5;E9PZH9;D3YU05;E9PYX4;D3Z0Z9;D3YV03;E9Q1F8;E9PZP4;F6QXU4;F6UT49;E9PX99;E9QP42;Q64467;F7D6E8;Q8BJ40
Protein FAM151A	Fam151a	1.16513	3.13206	0.372001	-1.42662	0.000172012	5	5	Q8QZW3
GMP reductase 1	Gmpr	0.52187	0.801507	0.651111	-0.619025	0.000185089	8	6	Q9DCZ1;F6VY18
Renin receptor	Atp6ap2	0.432805	0.557193	0.77676	-0.36446	0.000195952	8	8	Q1XID4;Q9CYN9
Pyruvate dehydrogenase E1 component subunit alpha, somatic form, mitochondrial	Pdha1	2.00754	2.44001	0.822759	-0.281458	0.000200152	14	14	P35486;Q3UFJ3
Splicing factor 1	Sf1	0.933518	0.779839	1.19707	0.259502	0.00020786	11	11	Q64213;Q3UI45;Q64213-3;D3YZD0;D3YZC9;E9Q4Q2;Q64213-2;D3YVH4;F8WHF9;D6RDB7
Methionine adenosyltransferase 2 subunit beta	Mat2b	0.89	0.701085	1.26946	0.344216	0.000228355	4	4	Q99LB6-2;Q99LB6;E0CYU5
Leucine--tRNA ligase, cytoplasmic	Lars	0.751083	0.571404	1.31445	0.394461	0.00023531	28	28	F8WH45;Q7TSZ3;Q8BMJ2
Collagen alpha-2(I) chain	Col1a2	0.7873	10.4841	0.0750947	-3.73515	0.000246519	3	3	Q01149;Q3TX57;E9Q6U9
Lamin-B2	Lmnb2	2.43895	2.10692	1.15759	0.211125	0.000279383	27	23	P21619;P21619-2;Q3V159
Voltage-dependent anion-selective channel protein 3	Vdac3	1.051	0.836119	1.257	0.329982	0.000288529	9	9	Q3TX38;Q60931
Adenosine deaminase	Ada	2.35683	1.04723	2.25054	1.17027	0.000288888	3	3	P03958;Q4FK28
Dehydrogenase/reductase SDR family member 4	Dhrs4	0.702698	1.08425	0.648096	-0.625721	0.000297769	7	7	G3X8V7;Q99LB2
Receptor expression-enhancing protein 6	Reep6	1.43569	1.14674	1.25198	0.324206	0.000314898	4	4	Q9JM62;Q9JM62-2;D3Z6V2
Isocitrate dehydrogenase [NADP];Isocitrate dehydrogenase [NADP] cytoplasmic	Idh1	0.990591	1.23458	0.802371	-0.317659	0.000321514	18	17	F8WIY0;O88844;D3YVY3
Protein sel-1 homolog 1	Sel1l	2.70623	1.83256	1.47675	0.562424	0.000325117	6	6	Q9Z2G6;Q6GTY4;Q9Z2G6-2
Splicing factor 3A subunit 3	Sf3a3	0.729773	0.633793	1.15144	0.203436	0.000369845	8	8	Q58E59;Q9D554
Ras-related protein Rab-39B	Rab39b	1.18026	0.971381	1.21503	0.280996	0.000371989	8	7	Q0PD14;Q8BHC1;D3YYJ7;Q8R1M8
Signal recognition particle 68 kDa protein	Srp68	1.26903	1.41244	0.898466	-0.154463	0.000403692	19	19	Q8BMA6;A2AAN2
Asparagine--tRNA ligase, cytoplasmic	Nars	1.59302	0.989661	1.60966	0.686758	0.000406022	16	16	Q8BP47
Heterogeneous nuclear ribonucleoprotein H;Heterogeneous nuclear ribonucleoprotein H, N-terminally processed	Hnrnph1	0.937102	0.800248	1.17101	0.227759	0.000410705	12	6	Q8C2Q7;O35737;Q811L7
Importin-5	Ipo5	0.910949	0.794437	1.14666	0.197437	0.000411358	23	23	Q8BKC5;Q8BKC5-2;E9PVZ5;A3KMD2;Q8BIV3
NADH dehydrogenase [ubiquinone] 1 alpha subcomplex subunit 4	Ndufa4	1.11865	1.30433	0.857643	-0.22155	0.000443588	6	6	Q62425
ADP/ATP translocase 1	Slc25a4	0.817579	0.949313	0.861232	-0.215526	0.000490772	17	10	P48962
Protein RCC2	Rcc2	0.494543	0.292705	1.68956	0.756649	0.000509061	15	15	Q8BK67;A2AWQ2
Zinc transporter 8	Slc30a8	3.34465	5.67504	0.589361	-0.762775	0.000516333	4	4	Q8BGG0
Cell division cycle protein 23 homolog	Cdc23	0.999707	0.815381	1.22606	0.294031	0.000571571	6	6	Q8BGZ4;G3X8W7;Q8BGZ4-2
Lysophospholipase-like protein 1	Lyplal1	2.13802	2.90514	0.735944	-0.442332	0.000597599	7	7	E9QLB2;Q3UFF7
UDP-N-acetylhexosamine pyrophosphorylase-like protein 1	Uap1l1	0.492697	0.428689	1.14931	0.200769	0.000698184	16	15	F7AWB4;Q3TW96;Q3TW96-2
Peptidyl-prolyl cis-trans isomerase E;Peptidyl-prolyl cis-trans isomerase F, mitochondrial	Ppie;Ppif	1.23428	1.02584	1.20319	0.266864	0.000699343	2	2	Q9QZH3;Q99KR7
Histone deacetylase 6	Hdac6	0.500394	0.624478	0.8013	-0.319586	0.000705976	15	15	Q9Z2V5;Q3UG37;B1AUA8
Stress-70 protein, mitochondrial	Hspa9	0.660487	0.525924	1.25586	0.328676	0.000724236	32	32	Q7TSZ0;P38647
Glutamate--cysteine ligase regulatory subunit	Gclm	0.948163	0.78255	1.21163	0.276952	0.000727595	3	3	O09172;Q4FJZ6;H3BJA3;F6VNW5
Annexin A5	Anxa5	2.17047	2.49353	0.870441	-0.200182	0.000729844	22	22	P48036
Sterol O-acyltransferase 1	Soat1	0.953774	0.748945	1.27349	0.348788	0.000782528	3	3	Q61263
UDP-glucose 4-epimerase	Gale	1.14517	1.4248	0.803741	-0.315198	0.000873856	10	10	B1AV55;Q8R059;B1AV54;B1AV53
Vacuolar protein sorting-associated protein 4A	Vps4a	1.50796	1.06634	1.41415	0.499931	0.000885279	4	2	Q8VEJ9;Q8BPY9
Threonine--tRNA ligase, cytoplasmic	Tars	0.884718	0.714407	1.23839	0.308471	0.000913125	23	22	Q9D0R2
Chloride intracellular channel protein 4	Clic4	1.10976	0.816041	1.35993	0.443534	0.000952555	6	6	Q543N5;Q9QYB1
Adenylate kinase isoenzyme 1	Ak1	0.899349	1.10796	0.811716	-0.300953	0.00104105	5	5	Q9R0Y5-2;Q9R0Y5
Amine oxidase [flavin-containing] A	Maoa	0.706495	0.836771	0.844311	-0.244154	0.00105546	12	12	Q64133
EH domain-containing protein 1	Ehd1	1.50018	1.9989	0.750503	-0.414071	0.00107957	11	7	F6YBI4;Q80ZZ0;Q9WVK4;F6Y7R7
Lysosome-associated membrane glycoprotein 2	Lamp2	0.945571	1.11466	0.848304	-0.237346	0.00108768	8	8	P17047;P17047-2;Q8C5K0;P17047-3
ATPase inhibitor, mitochondrial	Atpif1	0.933619	1.10596	0.844171	-0.244393	0.00108863	7	7	O35143;Q9D879;E9PV44
Serine--tRNA ligase, cytoplasmic	Sars	0.964719	0.658498	1.46503	0.55093	0.00110757	20	20	Q8C483;P26638;A2AFS0;A2AFS1
Glutamine synthetase	Glul	1.07356	1.37941	0.778275	-0.361649	0.0011136	14	14	P15105;D3YVK1;D3Z121
T-complex protein 1 subunit alpha	Tcp1	0.826027	0.880589	0.938039	-0.0922799	0.00111468	21	21	P11983;P11983-2;F2Z483
Lon protease homolog;Lon protease homolog, mitochondrial	Lonp1	1.44376	1.17017	1.2338	0.303113	0.00117994	20	20	E9Q120;Q8CGK3
Protein HEXIM1	Hexim1	0.846922	0.740476	1.14375	0.193776	0.00118768	2	2	Q8R409
Isoleucine--tRNA ligase, cytoplasmic	Iars	1.1215	0.828163	1.3542	0.437443	0.00119575	25	25	Q8BU30;E9Q866;F6Q6R1
SWI/SNF-related matrix-associated actin-dependent regulator of chromatin subfamily A member 5	Smarca5	0.666763	0.550154	1.21196	0.277339	0.00121666	19	14	Q91ZW3
Phosphoribosylformylglycinamidine synthase	Pfas	0.819808	0.643381	1.27422	0.349613	0.00124747	15	15	Q5SUR0;F6RUL9;G3UY86;Q14BH5
28S ribosomal protein S36, mitochondrial	Mrps36;Mrps36-ps1	1.19529	1.56866	0.761982	-0.392172	0.00125432	4	4	Q9CQX8;G3UWB2;Q9D6T9
Heterogeneous nuclear ribonucleoprotein A0	Hnrnpa0	1.18135	1.01366	1.16543	0.220863	0.00128855	6	6	Q9CX86
Clathrin heavy chain 1	Cltc	0.987369	0.945072	1.04476	0.0631651	0.00130813	67	67	Q5SXR6;Q68FD5;E9Q434;F6Z1R4
Sarcoplasmic/endoplasmic reticulum calcium ATPase 3	Atp2a3	2.47594	3.56855	0.693822	-0.527362	0.00130828	42	32	Q64518;E9Q559;Q64518-3;B1ATS5;Q64518-2;Q8R0X5;B1ATS4
Heat shock 70 kDa protein 12A	Hspa12a	0.53094	0.725913	0.73141	-0.451248	0.00135111	11	11	Q8K0U4;Q9CZJ2
Single-stranded DNA-binding protein, mitochondrial	Ssbp1	1.39637	1.53029	0.912487	-0.132124	0.00136994	5	5	Q8R2K3;Q9CYR0
Aromatic-L-amino-acid decarboxylase	Ddc	1.33834	1.59296	0.840159	-0.251265	0.00151939	17	17	O88533;Q5SUV8;Q5SUV9
Cold-inducible RNA-binding protein	Cirbp	1.50843	1.24261	1.21392	0.279674	0.00154412	2	2	P60824;D3YU80
1,2-dihydroxy-3-keto-5-methylthiopentene dioxygenase	Adi1	0.842097	0.742966	1.13343	0.18069	0.00157431	8	8	Q99JT9;F7ARY2
Chloride channel CLIC-like protein 1	Clcc1	1.02253	1.33279	0.76721	-0.382306	0.00163031	4	4	A2AEM2;Q99LI2
ADP-ribosylation factor-like protein 8A	Arl8a	1.39272	1.27504	1.0923	0.127363	0.00164305	6	2	Q8VEH3;F6QKK2
Phosphoglucomutase-1	Pgm1;Pgm2	0.972378	0.91214	1.06604	0.092262	0.00165955	22	22	Q9D0F9;A2CEK3;E9Q5E8
NADH dehydrogenase [ubiquinone] iron-sulfur protein 7, mitochondrial	Ndufs7	1.30151	1.50249	0.866235	-0.207169	0.00168962	4	4	Q9DC70
Small ubiquitin-related modifier 2;Small ubiquitin-related modifier 3	Sumo2;Sumo3	0.511747	0.462612	1.10621	0.145628	0.00171597	2	2	P61957;D3Z794;H7BWX9;G3UZA7;Q9Z172;Q9Z172-2;G3UWX9;G3UWI9;G3UZ60;G3UZX6
Thymocyte nuclear protein 1	Thyn1	1.04063	0.790803	1.31592	0.396067	0.00176746	5	5	Q91YJ3;Q8BJZ7
Eukaryotic translation initiation factor 2 subunit 2	Eif2s2	0.805201	0.688777	1.16903	0.225312	0.00189269	9	9	Q3ULL5;Q99L45;E0CXJ3
Progressive ankylosis protein	Ank;Ankh	1.33283	1.9166	0.695414	-0.524056	0.00192633	3	3	Q3UG85;Q9JHZ2
cAMP-dependent protein kinase type I-beta regulatory subunit	Prkar1b	1.01922	1.48985	0.684109	-0.547702	0.0019269	8	3	P12849;D3Z0V6;D3Z068;D3YTM5;D3Z406;D3Z4A5;D3Z7E4
Electron transfer flavoprotein subunit beta	Etfb	1.03976	1.1835	0.878547	-0.186809	0.00196703	15	15	Q9DCW4
Lysosomal alpha-mannosidase	Man2b1	0.613491	0.820285	0.7479	-0.419083	0.00198103	9	9	O09159
RNA-binding protein with serine-rich domain 1	Rnps1	0.876186	0.730865	1.19883	0.261632	0.0019909	5	5	Q99M28;Q99M28-2;E9PVX3
Cytoskeleton-associated protein 4	Ckap4	0.479276	0.591001	0.810956	-0.302304	0.0020303	25	25	Q8BMK4
26S proteasome non-ATPase regulatory subunit 1	Psmd1	0.945111	0.881619	1.07202	0.100328	0.00206391	19	19	Q3TXS7
Geranylgeranyl pyrophosphate synthase	Ggps1	0.759605	0.691234	1.09891	0.136075	0.00208358	3	3	Q3V0T8;Q9WTN0;Q9CZZ6
Isochorismatase domain-containing protein 1	Isoc1	1.10145	1.41469	0.77858	-0.361082	0.00212755	9	9	Q91V64
Heterogeneous nuclear ribonucleoprotein U-like protein 1	Hnrnpul1	0.945804	0.763412	1.23892	0.309079	0.00217901	9	9	Q8VDM6;Q8VDM6-2;Q8VDM6-3
Cysteine and histidine-rich domain-containing protein 1	Chordc1	0.798661	0.58488	1.36551	0.449443	0.00223069	6	6	Q9D1P4
Probable ATP-dependent RNA helicase DDX5	Ddx5	0.935977	0.834139	1.12209	0.166185	0.00224399	25	18	Q8BTS0;Q61656;B1ARB9;B1ARC0;B1ARB8
Coiled-coil-helix-coiled-coil-helix domain-containing protein 2, mitochondrial	2410018M08Rik;Chchd2	2.68122	4.53798	0.59084	-0.759161	0.00229008	3	3	B2RPU8;D3Z5B1;Q9D1L0
Synaptophysin	Syp	1.14895	1.03288	1.11238	0.153643	0.0023369	4	4	B1AVA7;Q62277;F8WGK2;F6VR28
Pyrroline-5-carboxylate reductase;Pyrroline-5-carboxylate reductase 2	Pycr2	1.37525	0.953864	1.44177	0.527838	0.0023877	13	10	Q3TMZ1;Q922Q4
Sarcoplasmic/endoplasmic reticulum calcium ATPase 2	Atp2a2	1.16992	1.61437	0.724691	-0.464561	0.00242505	39	24	F8WI94;O55143;O55143-2
Glutathione S-transferase Mu 2	Gstm2	3.40558	2.57801	1.32101	0.401643	0.00243383	14	9	P15626;D3YX76;Q8R5I6;F6Y363
Probable cationic amino acid transporter	Slc7a14	0.813582	1.12609	0.722484	-0.468962	0.00246451	7	7	Q8BXR1;D3YY38
UPF0577 protein KIAA1324	Kiaa1324	0.758658	1.89941	0.399418	-1.32403	0.00248932	4	4	A2AFS3-2;A2AFS3-3;A2AFS3
Astrocytic phosphoprotein PEA-15	Pea15;Pea15a	1.46592	1.81315	0.808494	-0.306692	0.00253992	2	2	Q62048;Q62048-2;D3Z375
Tropomodulin-2	Tmod2	1.54568	1.30476	1.18465	0.244457	0.0025878	8	7	Q9JKK7;Q9JKK7-2;Q9JKK7-3
DnaJ homolog subfamily C member 3	Dnajc3	2.57151	2.9624	0.86805	-0.204151	0.00264557	19	19	Q3UFV9;Q91YW3
Fucose mutarotase	1810014F10Rik;Le51	0.825733	0.687626	1.20085	0.264051	0.00267251	4	4	F6SJM7;Q8R2K1;D3YWS7;Q8R2K1-2;Q8R2K1-3;Q8R2K1-4;Q8R2K1-5;F6X9P4
Nucleotide exchange factor SIL1	Sil1	1.47795	1.90124	0.777361	-0.363343	0.00267276	3	3	Q9EPK6
Eukaryotic translation initiation factor 3 subunit D	Eif3d	1.05864	0.901663	1.1741	0.231552	0.00279447	11	11	O70194
ATP synthase subunit alpha, mitochondrial;ATP synthase subunit alpha	Atp5a1	1.52586	1.67163	0.912798	-0.131633	0.00279769	26	26	Q03265;D3Z6F5;D6RJ16
28S ribosomal protein S23, mitochondrial	Mrps23	0.674017	0.593308	1.13603	0.184004	0.00280233	4	4	Q5SXC8;Q8VE22;Q3TI14;A7M7Q8;E9Q6N1;F7ARZ1;Q5SXC9
Malectin	Mlec	1.6888	1.88512	0.895858	-0.158658	0.00284682	9	9	Q6ZQI3;D3Z1M3
Nucleolar protein 56	Nop56	0.800473	0.703037	1.13859	0.187252	0.00285036	20	20	A2APD6;Q9D6Z1;E0CXZ0;F7CHQ7;F6USW7;A2APD7;F7CHP9;F6V095;F6U250
WW domain-binding protein 11	Wbp11	1.04277	0.891105	1.1702	0.226754	0.00287866	7	7	Q923D5;H7BWZ5
	Idh3b	0.881261	1.00553	0.876414	-0.190315	0.00292462	16	16	Q91VA7
5-3 exoribonuclease 2	Xrn2	1.40792	1.06724	1.31922	0.399681	0.00297817	3	3	A2ATK1;Q9DBR1;Q9DBR1-2
High mobility group nucleosome-binding domain-containing protein 5	Hmgn5	1.39601	1.20185	1.16155	0.216052	0.00303997	3	3	Q9JL35
Cyclin-G-associated kinase	Gak	1.31637	1.13334	1.1615	0.215984	0.0030662	6	5	Q99KY4;E9QNB4;Q99KY4-2;F6SLK1;F7BG02
Phosphoserine aminotransferase	Psat1	0.260288	0.16567	1.57112	0.651796	0.00307426	13	13	Q543K5;Q99K85;Q3U6K9;E9Q6P1
Endoplasmic reticulum aminopeptidase 1	Erap1	1.25583	1.51253	0.830284	-0.268323	0.00309101	10	10	Q9EQH2;F8WIM4
Lysosomal alpha-glucosidase	Gaa	1.00095	0.815981	1.22668	0.294762	0.00313661	12	12	A2AFL4;P70699;F6R5R5;A2AFL5;A2AFL3;F6VEG4
Atlastin-3	Atl3	1.12003	1.29009	0.86818	-0.203934	0.00314456	5	4	Q91YH5;E9PYT3;Q91YH5-2
Heterogeneous nuclear ribonucleoprotein H2	Hnrnph2	0.63727	0.550051	1.15857	0.212339	0.00327401	10	5	A2BDV8;P70333
Methylcrotonoyl-CoA carboxylase beta chain, mitochondrial	Mccc2	2.91486	2.50669	1.16283	0.217643	0.00332078	13	13	B2RUK5;Q3ULD5;Q6PD20;F6ZNH0;Q8K1L7
Vesicle-associated membrane protein-associated protein B	Vapb	1.30889	1.49483	0.875611	-0.191638	0.0033448	11	10	Q8BH80;Q9QY76
Glycerol-3-phosphate dehydrogenase, mitochondrial	Gpd2	1.16893	1.56374	0.747522	-0.419812	0.00341067	35	35	Q64521;A2AQR0
Negative elongation factor B	Cobra1	0.980895	0.834709	1.17513	0.232825	0.00343123	4	4	A2AHZ8;Q8C4Y3;F6SWS9
Vitamin K epoxide reductase complex subunit 1-like protein 1	Vkorc1l1	1.13736	1.37175	0.829131	-0.270329	0.00347912	4	4	Q6TEK5;Q0VGU5
26S protease regulatory subunit 6B	Psmc4	0.988099	0.932397	1.05974	0.0837112	0.003498	19	19	P54775
Cytochrome c oxidase subunit 2	Mtco2;mt-Co2	1.18828	1.33409	0.890705	-0.166981	0.00350098	4	4	P00405;Q7JCZ1
Eukaryotic initiation factor 4A-III	Eif4a3;Gm8994;Gm5576	0.798021	0.735994	1.08428	0.116733	0.00352882	20	15	Q91VC3;D3YU49;A2AFK7;E9PV04
Prenylcysteine oxidase	Pcyox1	2.78171	3.0356	0.916362	-0.12601	0.00353102	10	10	Q9CQF9;F7CIP8;D3Z275
Dynactin subunit 2	Dctn2	1.09509	1.03738	1.05563	0.078105	0.00354748	15	15	Q3TPZ5;Q99KJ8
Polypyrimidine tract-binding protein 3	Rod1;Ptbp3	1.30793	0.97635	1.33961	0.421815	0.00355844	7	6	G3UXA6;G8JL74;Q8BHD7;Q8BHD7-2;G3UZ01;G3UXZ8;G3UY95
Interferon-stimulated gene 20 kDa protein	Isg20	1.80154	1.19419	1.50859	0.593198	0.00356459	2	2	Q9JL16;Q4FK39;Q9JL16-2
Monoacylglycerol lipase ABHD6	Abhd6	0.48465	0.374567	1.29389	0.371719	0.00359517	4	4	Q8R2Y0;Q8R2Y0-2;Q9D375
Protein MEMO1	Memo1	0.565265	0.686493	0.82341	-0.280318	0.00360853	4	4	Q91VH6
Synaptic vesicle membrane protein VAT-1 homolog	Vat1	6.2568	4.81858	1.29847	0.376817	0.00366792	10	10	Q499X4;Q62465
Isopentenyl-diphosphate Delta-isomerase 1	Idi1	1.2278	1.66831	0.735954	-0.442312	0.00367528	3	3	G3XA48;P58044
Aspartate aminotransferase, cytoplasmic	Got1	0.94127	0.709198	1.32723	0.40842	0.00367841	20	20	P05201;F7ALS6
N-acylneuraminate cytidylyltransferase	Cmas	1.88306	1.64858	1.14223	0.191855	0.00378373	14	14	Q99KK2;Q99KK2-2
Scaffold attachment factor B1	Safb	0.974567	0.784074	1.24295	0.313772	0.00395148	8	6	D3YXK2;E9PZM6
m7GpppX diphosphatase	Dcps	1.46084	1.14884	1.27158	0.34662	0.00395166	8	8	Q9DAR7;Q3TBW9;D6RFQ0
COMM domain-containing protein 3	Commd3	1.02119	0.798952	1.27816	0.354071	0.00400387	5	5	Q63829
Carboxypeptidase E	Cpe	1.51896	1.90438	0.797614	-0.326238	0.0040242	22	22	Q00493;Q543R4
Heterogeneous nuclear ribonucleoprotein D0	Hnrnpd	0.803472	0.69988	1.14801	0.19914	0.0040769	14	13	Q60668;Q60668-3;G3X9W0;Q60668-2;G5E8G0;Q60668-4;F6ZV59;E9Q5B6;F6SHF3;Q9D3U4;F7A465
D-dopachrome decarboxylase	Ddt	1.82833	1.55422	1.17636	0.234336	0.00409025	7	7	O35215;Q3UNI8;G3UZN1;G3UYJ7
Coatomer subunit zeta-2	Copz2	3.26025	2.4822	1.31345	0.393363	0.00409628	5	5	Q9JHH9;F2Z4A2
Secretagogin	Scgn	3.23595	3.94293	0.820697	-0.285079	0.00412658	14	14	Q5NCL7;Q91WD9
Isocitrate dehydrogenase [NAD] subunit gamma 1, mitochondrial	Idh3g	0.620527	0.69716	0.890078	-0.167996	0.00413923	10	10	P70404;Q3TGZ3;Q3TKM5
Small nuclear ribonucleoprotein F	Snrpf;Gm6616	0.642002	0.57184	1.1227	0.166966	0.00414505	3	3	P62307;Q497K3;F6VHB7
N-acetylneuraminate synthase	Nans	1.1554	1.02572	1.12643	0.171755	0.00414744	14	14	Q99J77
Septin-11	2013-09-11	0.929305	0.78458	1.18446	0.244232	0.00419952	12	5	Q8C1B7;Q8C1B7-2;Q8C1B7-3;F8VPR4;F6QE87;F6RM49
RNA-binding protein 39	Rbm39	0.866849	0.760668	1.13959	0.188514	0.00425344	10	10	Q8VH51;Q3U313;Q8VH51-2;Q0VGU9;Q8VH51-3;E9Q8F0;F7AA45;B7ZD61;B7ZD63
ATP synthase subunit b, mitochondrial	Atp5f1	1.38226	1.50373	0.919221	-0.121517	0.00451586	13	13	Q5I0W0;Q9CQQ7
Protein kinase C;Protein kinase C alpha type	Prkca	0.878374	1.34545	0.652848	-0.615182	0.00457004	8	7	Q4VA93;P20444;Q3TQ39;E9QMP2;P63318;Q2NKI4
Mitochondrial carrier homolog 2	Mtch2	1.01302	1.14424	0.885321	-0.175727	0.00457394	10	10	A2AFW7;Q791V5;Q9D050;A2AFW6
Phosphoserine phosphatase	Psph	0.35164	0.17111	2.05505	1.03918	0.00461753	8	8	E9QJS2;Q99LS3;D3Z4T3;D3Z666
Glycine--tRNA ligase	Gars	1.14515	0.930612	1.23053	0.299285	0.00471183	24	24	Q9CZD3
Ubiquitin carboxyl-terminal hydrolase isozyme L3;Ubiquitin carboxyl-terminal hydrolase isozyme L4	Uchl3;Uchl4	0.644234	0.590433	1.09112	0.125811	0.004714	9	9	Q9JKB1;B2RTM4;P58321;E9Q111
Coiled-coil domain-containing protein 47	Ccdc47	0.867133	0.721355	1.20209	0.265544	0.00471607	6	6	Q0VBU4;Q9D024;Q9D024-2;Q9D024-3
Long-chain specific acyl-CoA dehydrogenase, mitochondrial	Acadl	1.41773	1.61921	0.875569	-0.191707	0.00496032	15	15	P51174
E3 ubiquitin-protein ligase UBR4	Ubr4	1.19898	1.03825	1.15481	0.207654	0.00500173	30	30	A2AN08-5;A2AN08;A2AN08-3;A2AN08-2;F6SSP6;A2AN08-4
Probable fructose-2,6-bisphosphatase TIGAR	9630033F20Rik;Tigar	0.716588	0.630197	1.13709	0.185341	0.00503779	2	2	B2RWB7;Q8BZA9
Succinyl-CoA ligase [GDP-forming] subunit beta, mitochondrial	Suclg2	4.56082	5.8226	0.783296	-0.35237	0.00505243	17	17	Q9Z2I8;E9Q2W0;Q9Z2I8-2
Phosphatidylinositide phosphatase SAC1	Sacm1l	1.52646	1.71946	0.887755	-0.171766	0.0051376	21	21	Q9EP69
ADP-ribosylation factor-like protein 1	Arl1	1.46307	1.28684	1.13695	0.185166	0.00514719	3	3	P61211;Q14AC7;F8WIB1;Q4V9U3;E9Q006
Probable ATP-dependent RNA helicase DDX6	Ddx6	1.03221	0.89742	1.1502	0.201881	0.00516404	10	10	P54823
Tyrosine-protein phosphatase non-receptor type 1	Ptpn1	1.08251	1.25801	0.860494	-0.216763	0.00529761	6	6	P35821;Q3TZW9
Dedicator of cytokinesis protein 7	Dock7	1.45278	1.02963	1.41097	0.49669	0.00531435	4	4	Q8R1A4;A2A9M5;Q8R1A4-2;E9PX48;Q8C147;A2A9M4;F6ZJ55;A2AW79
Acetoacetyl-CoA synthetase	Aacs	0.807951	1.06435	0.759103	-0.397633	0.00541178	5	5	Q9D2R0
Eukaryotic peptide chain release factor subunit 1	Etf1	0.707184	0.636821	1.11049	0.151198	0.0054987	11	11	Q8BWY3
Catenin alpha-2	Ctnna2	0.678264	0.949919	0.714023	-0.485958	0.00557224	5	3	E0CXB9;Q61301;Q61301-3;Q61301-2;Q8BS72
1-acyl-sn-glycerol-3-phosphate acyltransferase gamma	Agpat3	1.0887	1.83359	0.593753	-0.752065	0.00558985	4	4	C4B4E7;Q9D517
Secretogranin-3	Scg3	1.60477	1.96977	0.814699	-0.295661	0.00559204	32	32	P47867-2;P47867
Dipeptidyl peptidase 4;Dipeptidyl peptidase 4 membrane form;Dipeptidyl peptidase 4 soluble form	Dpp4	0.959803	1.12677	0.851818	-0.231383	0.00564066	15	15	A2AS84;P28843
Heterogeneous nuclear ribonucleoprotein M	Hnrnpm	0.800633	0.719698	1.11246	0.153749	0.00576488	30	29	B8JK30;Q9D0E1;Q3THB3;Q9D0E1-2;B8JK32;B8JK33;E9Q0P7;F6W322;F7C9U3
Mannose-P-dolichol utilization defect 1 protein	Mpdu1	0.891124	0.84228	1.05799	0.0813263	0.00586962	2	2	Q8R0J2;Q9R0Q9;E9PWT5;F6XX36;Q5F2B1;E9PVP3
Cysteine--tRNA ligase, cytoplasmic	Cars	0.790229	0.622745	1.26894	0.343629	0.00598563	21	21	Q9ER72;Q3U716;Q9ER72-2;F6UYH5
Derlin-1	Derl1	1.45314	1.14768	1.26615	0.340453	0.00612661	3	3	Q99J56
Eukaryotic translation initiation factor 3 subunit K	Eif3k	1.17953	1.04896	1.12448	0.169252	0.00614554	7	7	Q9DBZ5;Q3TY56;Q9DBZ5-2
Vesicle-associated membrane protein 2	Vamp2	2.68694	2.24613	1.19625	0.258523	0.00618415	5	3	B0QZN5;P63044;Q8CHR4;F6Q6A5
Ubiquitin-40S ribosomal protein S27a;Ubiquitin;40S ribosomal protein S27a	Rps27a	0.985328	0.946192	1.04136	0.0584711	0.00635667	9	2	P62983;Q642L7
Alpha-enolase;Enolase	Eno1	0.572563	0.640528	0.893892	-0.161827	0.00643843	27	25	P17182;Q5FW97;Q6PHC1;B0QZL1;B1ARR7;B1ARR6;P21550;Q5SX58;D3Z2S4;Q5SX59;Q5SX60;Q5SX61
Rootletin	Crocc	1.32481	1.03659	1.27805	0.35394	0.00650205	8	8	Q8CJ40;A2AA80;Q8CJ40-2;Q8CJ40-3
Vacuolar ATPase assembly integral membrane protein VMA21	Vma21;Vma21-ps	0.842192	0.965215	0.872543	-0.196701	0.00656024	2	2	Q78T54;F2Z447;F2Z446;E9PUE9;Q78T54-2
Dual specificity mitogen-activated protein kinase kinase 2	Map2k2	0.906773	0.759199	1.19438	0.256263	0.00663865	5	3	Q63932;Q91YS7;Q3UPM3
BAG family molecular chaperone regulator 2	Bag2	2.43849	1.70584	1.4295	0.515506	0.00664202	3	3	Q91YN9
Mitochondrial 2-oxoglutarate/malate carrier protein	Slc25a11	0.972145	1.14728	0.847348	-0.238974	0.00673349	13	13	Q5SX53;Q9CR62;Q5SX46;Q5SX48
39S ribosomal protein L49, mitochondrial	Mrpl49	1.00281	0.823227	1.21815	0.284686	0.00681161	2	2	Q9CQ40;Q8BTB8
Alpha-soluble NSF attachment protein	Napa	1.16609	1.22679	0.950521	-0.0732092	0.00689287	18	15	Q9DB05
Nuclear migration protein nudC	Nudc	0.556927	0.596422	0.93378	-0.0988452	0.00697606	6	6	A2A9F5;O35685
Sortilin	Sort1	2.92093	3.84262	0.76014	-0.395663	0.00714513	4	4	Q6PHU5-2;Q6PHU5;A2AEF0
Transmembrane protein 163	Tmem163	2.05111	3.09013	0.663762	-0.591263	0.00719101	8	8	Q8C996
Lambda-crystallin homolog	Cryl1	1.74642	2.62935	0.664202	-0.590306	0.00725722	8	8	A7VMV2;Q99KP3;Q9D221
cAMP-dependent protein kinase type II-beta regulatory subunit	Prkar2b	1.41624	1.68065	0.842674	-0.246954	0.0072624	9	6	P31324;H3BK84
Cytoskeleton-associated protein 5	Ckap5	0.797335	0.930338	0.857038	-0.222569	0.0072976	27	27	A2AGT5;A2AGT5-3;A2AGT5-2
Tryptophan--tRNA ligase, cytoplasmic;T1-TrpRS;T2-TrpRS	Wars	0.962211	0.872273	1.10311	0.141574	0.0073821	20	20	P32921;P32921-2;Q3U6U7
Eukaryotic initiation factor 4A-I	Eif4a1	0.723581	0.679515	1.06485	0.0906491	0.00742113	25	12	P60843;Q5F2A7;Q3TSJ4
Chloride intracellular channel protein 1	Clic1	0.95965	0.829054	1.15752	0.211042	0.0074626	8	8	Q542F1;Q9Z1Q5
T-complex protein 1 subunit gamma	Cct3	0.732142	0.800801	0.914262	-0.12932	0.00776784	27	27	P80318;Q3U4U6;E9Q133;Q3U0I3;F6Q609;F6ZVG8
28S ribosomal protein S17, mitochondrial	Mrps17	0.684198	0.577058	1.18567	0.245698	0.00781358	2	2	Q9CQE3;D3Z198
Elongator complex protein 2	Elp2	0.938343	1.19768	0.783467	-0.352055	0.00781556	7	7	Q91WG4;Q91WG4-2
Multifunctional protein ADE2;Phosphoribosylaminoimidazole-succinocarboxamide synthase;Phosphoribosylaminoimidazole carboxylase	Paics	0.554453	0.43266	1.2815	0.357831	0.0078251	8	8	Q9DCL9;D6RCU8;D3Z6P1
Utrophin	Utrn	1.10829	1.23022	0.900888	-0.150581	0.0079325	16	16	E9Q6R7;Q61636;E9Q916;Q3TR59
Proteasome subunit beta type-5;Proteasome subunit beta type	Psmb5	0.754875	0.684197	1.1033	0.141826	0.0079539	10	10	O55234;D3Z2T2
Eukaryotic translation initiation factor 4E	Eif4e	0.648351	0.524594	1.23591	0.305574	0.00799613	9	9	P63073;Q3TK95
Transgelin-2	Tagln2	1.2026	1.04678	1.14886	0.200199	0.0080166	14	12	Q9WVA4
C-1-tetrahydrofolate synthase, cytoplasmic;Methylenetetrahydrofolate dehydrogenase;Methenyltetrahydrofolate cyclohydrolase;Formyltetrahydrofolate synthetase	Mthfd1	1.53382	1.70894	0.897527	-0.155973	0.00803563	36	36	F6YW06;Q922D8;Q8BXX7
Secernin-2	Scrn2	1.61057	1.26204	1.27616	0.351814	0.00816789	2	2	A2A712;Q8VCA8;A2A709
Synaptoporin	Synpr	0.718386	1.01068	0.710795	-0.492495	0.00821978	5	5	Q8BGN8-2;Q8BGN8;D3Z5Q8
Leucine-rich repeat-containing protein 16A	Lrrc16a	1.73424	1.60145	1.08292	0.114925	0.00833355	2	2	D3Z024;Q6EDY6;Q6EDY6-3;D3Z030;E9PU95;F7AI27;E9Q3Z9
Tubulin alpha-4A chain	Tuba4a	1.81582	1.35028	1.34477	0.427363	0.0083543	22	4	P68368
26S protease regulatory subunit 7	Psmc2	1.06215	0.950343	1.11765	0.160467	0.00840814	21	21	Q8BVQ9;P46471
Asparagine synthetase [glutamine-hydrolyzing]	Asns	0.486187	0.372756	1.3043	0.38328	0.00857117	15	15	Q61024;D3Z0C2;D3YYR0;D3Z028
Succinate dehydrogenase [ubiquinone] cytochrome b small subunit, mitochondrial	Sdhd	0.858645	1.27436	0.673785	-0.569639	0.00869601	2	2	Q9CXV1
Protein ETHE1, mitochondrial	Ethe1	1.0906	0.948446	1.14988	0.201485	0.00888587	2	2	Q9DCM0
Fatty acid synthase;[Acyl-carrier-protein] S-acetyltransferase;[Acyl-carrier-protein] S-malonyltransferase;3-oxoacyl-[acyl-carrier-protein] synthase;3-oxoacyl-[acyl-carrier-protein] reductase;3-hydroxypalmitoyl-[acyl-carrier-protein] dehydratase;Enoyl-[acyl-carrier-protein] reductase;Oleoyl-[acyl-carrier-protein] hydrolase	Fasn	0.638596	0.679443	0.939882	-0.089449	0.00890882	52	52	P19096
Poly [ADP-ribose] polymerase 1	Parp1	0.62001	0.50393	1.23035	0.299068	0.00899788	27	27	Q921K2;P11103;P11103-2
Spermidine synthase	Srm	0.719088	0.61991	1.15999	0.21411	0.00903982	10	10	Q543H0;Q64674
Adaptin ear-binding coat-associated protein 1	Necap1	0.618804	1.11236	0.556298	-0.846069	0.00906192	3	3	Q0VB06;Q9CR95
NADH dehydrogenase [ubiquinone] 1 alpha subcomplex subunit 5	Ndufa5	1.34526	1.44966	0.927983	-0.10783	0.00936807	7	7	Q9CPP6;D3YTQ8
Calreticulin	Calr	0.947335	1.08655	0.871874	-0.197808	0.00940611	17	17	B2MWM9;P14211
Importin subunit beta-1	Kpnb1	0.784624	0.739611	1.06086	0.0852348	0.00941304	25	25	P70168
Signal transducer and activator of transcription 3	Stat3	1.27874	1.79115	0.713921	-0.486163	0.00943322	9	9	P42227;P42227-3;P42227-2;Q6GU23;B7ZC18
U1 small nuclear ribonucleoprotein C	Snrpc	0.820012	0.679856	1.20616	0.270416	0.00951043	3	3	Q569X3;Q62241
Ribose-5-phosphate isomerase	Rpia	7.74406	12.091	0.640481	-0.642772	0.00958429	2	2	P47968
Mitochondrial inner membrane protein	Immt	1.46499	1.63634	0.895285	-0.159582	0.00959202	30	30	E9QLA0;Q8CAQ8-5;Q8CAQ8;Q8CAQ8-2;E9QAY3;E9Q800;Q8CAQ8-3;E9QAY6;Q3TZK4;E9Q0J9;E9PVS5;Q8CAQ8-4
Nucleoside diphosphate kinase;Nucleoside diphosphate kinase B	Gm20390;Nme2	0.956716	0.854512	1.11961	0.16299	0.00969974	16	6	E9PZF0;Q01768;Q5NC82
Late secretory pathway protein AVL9 homolog	Avl9	1.40662	1.26856	1.10883	0.149041	0.00986961	5	5	Q80U56
Dephospho-CoA kinase domain-containing protein	Dcakd	0.668599	0.611281	1.09377	0.129305	0.00995589	3	3	Q8BHC4;B0QZX9
	Nolc1	1.24558	1.07294	1.1609	0.215248	0.0100452	2	2	E9Q5C9;E9PVC9
Heat shock protein HSP 90-alpha	Hsp90aa1	0.594322	0.646584	0.919172	-0.121593	0.0101988	47	29	P07901;Q80Y52;B7ZC50;B7ZC49;A2A6A2
Protein phosphatase 1 regulatory subunit 12A	Ppp1r12a	0.864452	0.95289	0.90719	-0.140524	0.0102428	9	9	Q9DBR7;Q9DBR7-2
Insulin-1;Insulin-1 B chain;Insulin-1 A chain	Ins1	14.9185	21.0193	0.709752	-0.494612	0.0104011	2	2	P01325;Q545I7
	Trip11	1.35039	1.23564	1.09287	0.128118	0.0104177	11	11	E9Q512;H3BJG4;Q8BVJ9;E9Q4A9;H3BJH8
Aconitate hydratase, mitochondrial	Aco2	1.8775	2.18726	0.85838	-0.220312	0.0104225	38	38	Q99KI0
6-phosphofructokinase, muscle type	Pfkm	0.837138	0.976295	0.857464	-0.221852	0.010517	15	12	P47857
Proteasome subunit beta type;Proteasome subunit beta type-2	Psmb2	1.17779	1.0055	1.17135	0.228169	0.0105509	5	5	A2A882;Q9R1P3
Methyl-CpG-binding protein 2	Mecp2	2.95243	2.51244	1.17512	0.232814	0.0105614	10	10	Q9Z2D6-2;Q9Z2D6;D3Z7U4;D3YY81
Guanine nucleotide-binding protein G(i) subunit alpha-2	Gnai2	1.38649	1.20327	1.15227	0.204477	0.0105655	14	8	P08752;Q8JZT4;A2AE33;B2RVZ3;P50149;Q3V3I2;P20612;A2AE32;F6QPU5;Q8C040;A2AE31;A2A610
Protein DJ-1	Park7	1.34257	1.52134	0.882492	-0.180345	0.010584	10	10	Q99LX0;A2A813;A2A815;A2A816;A2A817
Splicing factor 3B subunit 3	Sf3b3	0.894265	0.793054	1.12762	0.173283	0.0106918	20	20	B2RSV4;Q921M3;F8WHW1;Q921M3-2
Calcyclin-binding protein	Cacybp	0.630079	0.732422	0.860268	-0.217142	0.0108765	13	13	Q9CXW3
Ras-related protein Rap-1b;Ras-related protein Rap-1A	Rap1b;Rap1a	1.83162	1.6152	1.13399	0.181407	0.0108875	9	8	Q52L50;Q99JI6;P62835
Acyl-protein thioesterase 2	Lypla2	1.20334	1.52259	0.790324	-0.339483	0.0110096	3	3	B1AV56;Q9WTL7
Tetratricopeptide repeat protein 39B	Ttc39b	1.22333	1.0818	1.13083	0.17738	0.0110951	4	4	Q8BYY4;Q8BYY4-2;E0CX38;Q8BYY4-3;E0CY48
	Ctrl	9.44408	2.2355	4.22459	2.07881	0.0113734	6	6	Q9ER05
ATP-dependent RNA helicase A	Dhx9	0.664019	0.599707	1.10724	0.146967	0.0113925	34	34	E9QNN1;O70133-2;O70133;O70133-3
Centromere protein V	Cenpv	2.1077	1.64019	1.28503	0.361807	0.0114557	11	11	Q9CXS4;Q9CXS4-2;F6SS03
Glucose-6-phosphate 1-dehydrogenase X;Glucose-6-phosphate 1-dehydrogenase	G6pdx	0.570382	0.48587	1.17394	0.231358	0.0115491	15	15	Q00612;Q790Y8;A3KG36;G3UWD6;P97324;REV__P46662;REV__Q5NCK4;REV__Q3TIW4
Transketolase	Tkt	1.08149	0.984143	1.09892	0.13608	0.0116011	23	23	P40142;E0CY51
Nuclear protein localization protein 4 homolog	Nploc4	1.09486	0.887862	1.23314	0.302339	0.0116737	8	8	P60670;P60670-2
Protein Red	Ik	1.03713	0.845764	1.22626	0.29427	0.011726	7	7	Q9Z1M8
Carnitine O-palmitoyltransferase 2, mitochondrial	Cpt2	2.77069	3.37041	0.822063	-0.282679	0.0117265	12	12	P52825;A2A8E8;A2A8E7;A2A8E9
Protein YIPF3	Yipf3	1.54138	1.38268	1.11478	0.156755	0.0117271	3	3	Q3UDR8;F6YIY0
28S ribosomal protein S9, mitochondrial	Mrps9	0.682414	0.567998	1.20144	0.264761	0.0117647	3	3	Q9D7N3;Q3UMV5;F6QIZ3
Aspartate aminotransferase, mitochondrial	Got2	1.08338	1.1826	0.9161	-0.126423	0.0117742	22	22	P05202
Pyridoxal-dependent decarboxylase domain-containing protein 1	Pdxdc1	1.59386	1.69814	0.938592	-0.0914305	0.0117953	16	16	E9Q8P7;Q99K01-2;Q99K01-4;Q99K01;Q99K01-3;D3YZA7;E9PZ98;Q99K01-5
Transcription elongation factor A protein-like 3;Transcription elongation factor A protein-like 5	Tceal3;Tceal6;Tceal5	3.62376	3.25298	1.11398	0.155725	0.0118054	3	3	Q8R0A5;Q9DB24;A2AEC2;Q14C38;Q8CCT4;A2AEC1
cAMP-dependent protein kinase catalytic subunit beta	Prkacb	1.80412	2.07585	0.869099	-0.202407	0.0118834	15	7	P68181;P68181-4;P68181-3;P68181-2
Superoxide dismutase [Mn], mitochondrial;Superoxide dismutase	Sod2	1.50393	1.77267	0.848398	-0.237187	0.0119322	9	9	P09671;Q4FJX9
Cytochrome c oxidase subunit 6B1	Cox6b1	1.02403	1.07559	0.952064	-0.0708703	0.0122532	5	5	P56391
	Slc24a2	1.15166	1.40078	0.822156	-0.282516	0.0123786	2	2	Q8BUN9;B1AXF2;Q14BI1;B1AXF3;E9Q135;F6RT95
Neuronal migration protein doublecortin	Dcx	0.300171	0.22566	1.33019	0.411634	0.0125675	9	9	O88809;Q6E5A4;Q6PGI2;Q9CXL6;Q9JLM8;Q9JLM7;Q8BRN4;Q80VB6;Q9JLM8-2
UV excision repair protein RAD23 homolog A	Rad23a	1.62984	1.4803	1.10102	0.138841	0.0126812	3	2	P54726;Q8CAP3;Q3TN85;Q8BRA9;F6YL88
Craniofacial development protein 1	Cfdp1	1.4989	0.947948	1.5812	0.661024	0.0128006	2	2	O88271
Proteasomal ubiquitin receptor ADRM1	Adrm1;Gm9774	1.39088	1.26912	1.09594	0.132169	0.0128763	5	5	Q9JKV1;D3YUD8
Nucleolar protein 58	Nop58	0.724981	0.618056	1.173	0.230206	0.0130044	11	11	Q6DFW4
Glutathione S-transferase omega-1	Gsto1	1.38475	0.982579	1.4093	0.49498	0.0131971	5	5	O09131;Q8K2Q2;E9Q299;D3Z1Q9
GDP-L-fucose synthase	Tsta3	0.814189	0.593077	1.37282	0.457144	0.0133052	8	8	P23591;Q5HZI6
Chromogranin-A;Pancreastatin;Beta-granin;WE-14	Chga	1.37825	1.74831	0.788333	-0.343123	0.0135728	20	20	P26339
Cytoplasmic protein NCK1	Nck1	0.873097	0.992773	0.879453	-0.185322	0.0136565	5	5	Q99M51;Q8BH99;O55033
Elongation factor 2	Eef2	0.774459	0.745406	1.03898	0.0551624	0.0138239	40	39	P58252
Amine oxidase [flavin-containing] B	Maob	1.01264	1.30843	0.773935	-0.369715	0.0139024	26	26	Q8BW75;E9Q3X6;E9PVL9
Cytoplasmic dynein 1 heavy chain 1	Dync1h1	0.943115	0.903889	1.0434	0.0612881	0.0139502	145	145	Q9JHU4;F6ZX84
Acylphosphatase;Acylphosphatase-1	Acyp1	0.908669	1.03358	0.879147	-0.185823	0.0142043	5	5	E9QJT5;P56376;Q8BMV3
GRIP1-associated protein 1	Gripap1	0.592401	0.782509	0.757053	-0.401533	0.0142787	10	10	Q8VD04;A2AEW8;A2AEW9;A2AEW5;A2AEW6
Galactocerebrosidase	Galc	1.17099	1.63269	0.717215	-0.479522	0.014339	4	4	P54818;F6PYF7
Phosphatidylserine synthase 1	Ptdss1	0.621859	0.860613	0.722577	-0.468777	0.0143536	2	2	Q99LH2
Alpha-ketoglutarate-dependent dioxygenase FTO	Fto	0.901369	0.688365	1.30943	0.388944	0.0145198	2	2	Q8BGW1;Q8BGW1-2;Q8BGW1-3;Q8BGW1-4;E9Q1E4;D3Z127
	Plcb4	0.919665	1.11543	0.824494	-0.27842	0.0145258	2	2	Q91UZ1;A2AT91
Small nuclear ribonucleoprotein G	Snrpg	0.636429	0.562955	1.13051	0.17698	0.014756	3	3	P62309;Q3V424
Glyoxalase domain-containing protein 4	Glod4	2.00932	2.10877	0.95284	-0.0696944	0.0147574	12	12	Q9CPV4;Q9CPV4-2;E9Q197;Q9CPV4-3;F6ZTG3;F7BB55;E9Q2R6;E9Q055
	Snrnp200	0.78354	0.707758	1.10707	0.146751	0.0147802	38	38	Q6P4T2;E9QAF6
Nucleobindin-1	Nucb1	1.18409	1.31919	0.897589	-0.155874	0.0148539	25	25	Q02819;H3BK79;D3Z7D7;D3Z1N1
Heterogeneous nuclear ribonucleoproteins A2/B1	Hnrnpa2b1	0.820893	0.759259	1.08118	0.112602	0.0150442	24	24	O88569;F6U106;O88569-2;O88569-3
7-dehydrocholesterol reductase	Dhcr7	0.776928	0.970775	0.800317	-0.321356	0.0151105	4	4	O88455;D3Z7G1;D3YXR4
Programmed cell death 6-interacting protein	Pdcd6ip	1.19127	1.29793	0.917823	-0.123712	0.0153748	30	30	B8JJL8;Q9WU78-3;Q9WU78;E9QQ36;Q9WU78-2
ATP synthase subunit O, mitochondrial	Atp5o;Gm5436	1.51899	1.66635	0.911567	-0.133579	0.015475	12	12	Q9DB20;D3Z4J0;F7D3P8;F6XVM5
Serrate RNA effector molecule homolog	Srrt	0.706461	0.641524	1.10122	0.139107	0.0156063	14	14	Q99MR6;Q99MR6-2;Q99MR6-4;Q99MR6-3
Cleavage and polyadenylation specificity factor subunit 6	Cpsf6	0.827101	0.713147	1.15979	0.213864	0.0156942	7	7	H3BJW3;H3BJ30;Q6NVF9;H3BKW0;H3BLM9
Complement component receptor 1-like protein	Cr1l	1.88273	1.45281	1.29592	0.37398	0.0158303	2	2	Q64735;Q64735-2
Putative pre-mRNA-splicing factor ATP-dependent RNA helicase DHX15	Dhx15	0.625613	0.568038	1.10136	0.139283	0.0160033	19	18	O35286;Q3UKJ6;F6ZF21;A2A4P0;A2A4N9
rRNA 2-O-methyltransferase fibrillarin	Fbl	0.818244	0.715912	1.14294	0.192749	0.0161098	8	6	P35550
NADH-cytochrome b5 reductase 3;NADH-cytochrome b5 reductase 3 membrane-bound form;NADH-cytochrome b5 reductase 3 soluble form	Cyb5r3	1.03504	1.28683	0.804333	-0.314135	0.0164942	18	18	F2Z456;E9Q841;Q9DCN2;Q9DCN2-2;F2Z3V0
Calponin-3	Cnn3	2.60833	3.16846	0.823217	-0.280655	0.016501	6	6	Q9DAW9;Q08093;Q543F3;D3Z7R6
Transcription intermediary factor 1-beta	Trim28	0.782389	0.63298	1.23604	0.305726	0.0165524	15	15	Q5EBP9;Q62318;Q62318-2
Peptidyl-prolyl cis-trans isomerase;Peptidyl-prolyl cis-trans isomerase FKBP3	Fkbp3	0.573553	0.658688	0.870751	-0.199668	0.0166246	12	12	Q3UBU9;Q62446
AMP deaminase 2	Ampd2	1.16226	1.01618	1.14375	0.193777	0.0166253	20	20	A2AE27;Q9DBT5;F7ATG4;F7D159;A2AE25;A2AE22;F6WIB6
Integrator complex subunit 1	Ints1	0.804533	0.625497	1.28623	0.363149	0.0169871	3	3	Q6P4S8
SH3 domain-containing kinase-binding protein 1	Sh3kbp1	2.15855	1.3358	1.61592	0.692358	0.0171538	4	4	A2AG61;Q8R550;Q3TA88;Q8R550-2;B1AVE8;Q8R550-3;Q8R550-4;E9Q0C1;E9QND4;Q8R550-5;Q8R550-8;Q8R550-6;B0R0Y8;B1AZ85
Pre-mRNA-processing-splicing factor 8	Prpf8	0.768465	0.692883	1.10908	0.149368	0.0171577	48	48	Q99PV0;B7ZC27;E9Q3K7
Insulin receptor-related protein;Insulin receptor-related protein alpha chain;Insulin receptor-related protein beta chain	Insrr	0.94536	1.22586	0.771181	-0.374858	0.0172592	4	4	Q9WTL4
CCA tRNA nucleotidyltransferase 1, mitochondrial	Trnt1	1.02613	0.915111	1.12132	0.165195	0.0173468	7	7	Q8K1J6;Q8K1J6-2
Cystathionine gamma-lyase	Cth	0.175725	0.281369	0.624536	-0.679144	0.0173776	6	6	Q8VCN5
	Itpkb	1.10571	1.41472	0.781575	-0.355543	0.0173888	6	6	B2RXC2;Q7TS72;D3YYP0;Q8R071
Phosphate carrier protein, mitochondrial	Slc25a3	1.34377	1.44566	0.92952	-0.105442	0.0175489	14	14	G5E902;Q8VEM8
	Akr1c14	0.822509	0.648493	1.26834	0.34294	0.0175776	10	8	Q91WT7;P70694;Q3UEM0;Q91WR5;Q3UXL1;D3YWM3;G3XA14;D3Z3P8;E0CYR9
ATP-binding cassette sub-family F member 2	Abcf2	0.638705	0.555766	1.14923	0.200672	0.0177056	13	13	Q99LE6
Cytochrome b-c1 complex subunit Rieske, mitochondrial;Cytochrome b-c1 complex subunit 11	Uqcrfs1	1.7726	2.27544	0.779014	-0.360279	0.0180181	6	6	Q9CR68
Nidogen-1	Nid1	1.86726	3.19957	0.583597	-0.776955	0.018093	9	8	P10493
Histidine triad nucleotide-binding protein 1	Hint1	0.702919	0.597305	1.17682	0.234891	0.0181581	7	7	B1AZK3;P70349;B0R1E3
Nascent polypeptide-associated complex subunit alpha, muscle-specific form;Nascent polypeptide-associated complex subunit alpha	Naca	0.873418	0.815221	1.07139	0.099481	0.0182184	4	4	P70670;Q60817
Electron transfer flavoprotein-ubiquinone oxidoreductase, mitochondrial	Etfdh	1.70198	2.03684	0.835598	-0.259119	0.0185084	16	16	Q921G7;Q6PF96
ATP-dependent RNA helicase DDX42	Ddx42	1.04454	0.842483	1.23984	0.310148	0.0186569	12	12	Q810A7;Q810A7-2
Exocyst complex component 6B	Exoc6b	1.92101	2.60624	0.737081	-0.440105	0.0189004	3	3	A6H5Z3;A6H5Z3-2;F6Q3Q9;E0CXR2;E9Q1K9;Q9D4R7;E0CY34
V-type proton ATPase 116 kDa subunit a isoform 2	Atp6v0a2	1.0416	0.85637	1.2163	0.282495	0.0189561	5	3	P15920
Lysosomal acid phosphatase	Acp2	1.22711	0.868966	1.41215	0.497893	0.0191902	4	4	A2AGR5;P24638;E9Q9I3;B7ZCF5;B7ZCF4
Lysosome-associated membrane glycoprotein 1	Lamp1	0.794532	0.903824	0.879078	-0.185937	0.0193914	4	4	P11438;Q3TA96
Methylmalonyl-CoA mutase, mitochondrial	Mut	3.40334	2.71434	1.25384	0.32635	0.0194612	8	8	P16332
Flap endonuclease 1	Fen1	0.157655	0.119876	1.31515	0.395228	0.0195456	7	7	E9PYV9;Q91Z50;P39749
Centromere/kinetochore protein zw10 homolog	Zw10	0.94634	0.870897	1.08663	0.119857	0.0196381	8	8	O54692
Procollagen galactosyltransferase 1	Glt25d1	1.14866	1.01863	1.12765	0.173322	0.0199127	3	3	Q8K297
	Srp72	1.20152	1.30094	0.923578	-0.114694	0.0201196	17	17	F8VQC1;E9Q740
Cytidine deaminase	Cda	3.57539	8.04325	0.444521	-1.16968	0.0202759	3	3	A2AM79;P56389
Cytoplasmic aconitate hydratase	Aco1	1.1554	1.29759	0.89042	-0.167442	0.0202876	15	15	Q8VDC3;P28271;Q811J3
Matrin-3	Matr3	0.600328	0.556836	1.07811	0.108498	0.0202913	19	19	Q6ZQ61;Q5BL18;Q8K310
Golgin subfamily A member 4	Golga4	2.01263	2.55048	0.789118	-0.341687	0.0203002	10	10	Q91VW5;E9Q5J7;F6V6W2
Paired amphipathic helix protein Sin3a	Sin3a	0.79637	0.662188	1.20263	0.266198	0.0206006	5	5	F8WJ61;Q60520-1;Q60520
Up-regulated during skeletal muscle growth protein 5	Usmg5	1.37567	1.52107	0.904409	-0.144952	0.0206719	3	3	Q78IK2
DnaJ homolog subfamily C member 7	Dnajc7	0.836444	0.691623	1.20939	0.274283	0.0208449	8	8	A2A5E2;Q9QYI3;F7BTP8;A2A5E1
Vesicle-associated membrane protein 3	Vamp3	2.16482	1.76463	1.22678	0.294881	0.0209464	5	3	A2A895;P63024
DnaJ homolog subfamily A member 4	Dnaja4	5.22158	4.43611	1.17706	0.235191	0.0210078	5	5	Q9JMC3;D3Z1U5
UPF0672 protein C3orf58 homolog	1190002N15Rik	1.13249	0.963142	1.17583	0.233678	0.0210083	2	2	E9QPR3;Q3USZ8;E9Q9E9
Protein asunder homolog	Asun;4933424B01Rik	1.46955	0.775121	1.8959	0.922881	0.0211276	5	5	Q8QZV7;F6W761;F7BP94
Eukaryotic translation initiation factor 5	Eif5	1.0935	0.879299	1.2436	0.314527	0.0211739	8	8	P59325;Q3TQR3;Q8BVV6;Q05CM5;Q05CH7
Steryl-sulfatase	Sts	0.604734	0.52202	1.15845	0.212196	0.0212065	3	3	P50427
Cytochrome c oxidase subunit 5B, mitochondrial	Cox5b	1.59147	1.84511	0.862534	-0.213347	0.0212408	5	5	Q9D881;E9PWM0;P19536
Actin-related protein 2/3 complex subunit 1B	Arpc1b	1.39772	1.14717	1.21841	0.284996	0.0212677	6	6	Q9WV32;F6VVE6;F6THG2
40S ribosomal protein S5;40S ribosomal protein S5, N-terminally processed	Rps5	1.05125	0.959049	1.09614	0.132429	0.0213929	9	9	Q91V55;D3YYM6;P97461
S-adenosylmethionine synthase isoform type-2;S-adenosylmethionine synthase	Mat2a	0.597156	0.497538	1.20022	0.263301	0.0215526	11	9	Q3THS6;Q99J57;E9Q0D0;F8WJ09;Q6PE05
Heterochromatin protein 1-binding protein 3	Hp1bp3	1.32987	1.56451	0.850023	-0.234426	0.0215685	13	13	Q3TEA8;Q3TEA8-2;Q3TEA8-3;A2AM65;A2AM63;A2AM62;A2AM70;A2AM69
Polycomb protein EED	Eed	0.552724	0.320154	1.72643	0.787793	0.0218922	3	3	F6TJE4;Q921E6-2;Q921E6;Q921E6-3
Replication factor C subunit 2	Rfc2	0.534169	0.414422	1.28895	0.366196	0.0222183	5	5	Q4KL82;Q9WUK4
FAS-associated factor 2	Faf2	1.8321	3.13656	0.584111	-0.775685	0.0223671	9	9	Q3TDN2;Q3TDN2-2;D3Z2H4;D3YUP4;D3Z4G9;D6RE51
Coatomer subunit alpha;Xenin;Proxenin	Copa	1.81272	1.67442	1.0826	0.114495	0.0225356	55	55	Q8CIE6;F8WHL2;F6ZWD0;E9PZ47;F6XJN3
Protein disulfide-isomerase A3	Pdia3	1.52656	1.74573	0.874454	-0.193546	0.0227756	41	41	P27773;F6Q404
Serine/threonine-protein phosphatase PP1-gamma catalytic subunit;Serine/threonine-protein phosphatase	Ppp1cc	0.705999	0.937093	0.753393	-0.408526	0.0227871	12	2	P63087-2;P63087;Q6ZWM8
DnaJ homolog subfamily A member 1	Dnaja1	0.925476	1.04301	0.887313	-0.172486	0.0230877	7	7	P63037;Q5NTY0;B1AXY1;B1AXY0;B1AXX9
N(4)-(beta-N-acetylglucosaminyl)-L-asparaginase;Glycosylasparaginase alpha chain;Glycosylasparaginase beta chain	Aga	0.9994	1.18832	0.841019	-0.249789	0.0231734	6	6	A2RSS6;Q64191
AP-1 complex subunit beta-1	Ap1b1	1.18556	1.29928	0.912475	-0.132144	0.0231953	27	8	Q8CC13;O35643;Q5SVG4;Q5SVG5
60 kDa SS-A/Ro ribonucleoprotein	Trove2	1.11441	1.01609	1.09676	0.133252	0.0232258	6	6	O08848;Q3TJ75
Acidic leucine-rich nuclear phosphoprotein 32 family member E	Anp32e	0.518363	0.428003	1.21112	0.276342	0.0232418	3	3	P97822;P97822-2;E9PZF5;E9Q5H2
	Bud31	0.621344	0.490707	1.26622	0.34053	0.0233206	5	5	E0CX20;Q6PGH1
Receptor-type tyrosine-protein phosphatase N2	Ptprn2	2.85726	3.33592	0.856513	-0.223452	0.0234596	25	24	P80560;Q8C8Z6
Desumoylating isopeptidase 1	Pppde2	0.731738	1.10378	0.662938	-0.593054	0.0236903	3	3	Q9CQT7;Q3TCG9;D6RDE8;F8WJJ8;E9Q2Y9
Cleavage and polyadenylation specificity factor subunit 2	Cpsf2	0.949146	0.788242	1.20413	0.267991	0.0238007	6	6	O35218
Septin-9	2013-09-09	2.06891	1.79082	1.15529	0.208251	0.0239409	10	10	Q80UG5;Q80UG5-3;A2A6U3;Q80UG5-2;A2A6U5;A8Y5D3
14-3-3 protein theta	Ywhaq	0.888427	0.843537	1.05322	0.0748019	0.0242829	18	12	F6VW30;F6YY69;A3KML3;P68254;P68254-2
RNA-binding protein 14	Rbm14	0.927644	0.823942	1.12586	0.171028	0.0243198	13	13	Q8C2Q3;E9Q205;Q8C2Q3-2;E9QL13;E9PXP4
Succinyl-CoA:3-ketoacid-coenzyme A transferase 1, mitochondrial	Oxct1	0.553376	0.427895	1.29325	0.371003	0.0244416	12	12	Q9D0K2;Q3UJQ9
116 kDa U5 small nuclear ribonucleoprotein component	Eftud2	0.751263	0.654648	1.14758	0.198599	0.0244889	20	19	A2AH85;O08810;Q543F1;G3UZ34;G3UXK8;G3UZ25
Carboxymethylenebutenolidase homolog	Cmbl	2.40826	2.62126	0.918741	-0.122269	0.0245544	4	4	Q8R1G2;E0CXH4;E0CXT6
Microfibrillar-associated protein 1	Mfap1b;Mfap1	1.01337	0.890981	1.13736	0.185694	0.0246462	2	2	A2ARQ8;Q9CQU1
Host cell factor 1;HCF N-terminal chain 1;HCF N-terminal chain 2;HCF N-terminal chain 3;HCF N-terminal chain 4;HCF N-terminal chain 5;HCF N-terminal chain 6;HCF C-terminal chain 1;HCF C-terminal chain 2;HCF C-terminal chain 3;HCF C-terminal chain 4;HCF C-terminal chain 5;HCF C-terminal chain 6	Hcfc1	0.874786	0.689713	1.26833	0.342934	0.0248582	19	19	B1AUX2;Q61191;F6SJS2
Endoplasmic reticulum resident protein 29	Erp29	1.34566	1.48186	0.908088	-0.139095	0.0248794	10	10	P57759;D6RG87;F8WIM7;F8WJI4
DNA-directed RNA polymerase II subunit RPB2	Polr2b	0.958241	0.911521	1.05125	0.0721126	0.0248914	9	9	Q8CFI7
Hepatoma-derived growth factor-related protein 3	Hdgfrp3	2.62694	1.52452	1.72313	0.785028	0.0249201	5	5	Q9JMG7-2;Q9JMG7
Elongator complex protein 1	Ikbkap	1.02888	1.21251	0.848554	-0.236922	0.0249494	10	10	Q7TT37
6-phosphofructokinase, liver type	Pfkl	0.915689	1.00959	0.906991	-0.14084	0.0249695	16	12	P12382
Protein disulfide-isomerase	P4hb	1.30586	1.38989	0.939542	-0.0899705	0.025004	40	40	P09103;E9Q8G8
Succinyl-CoA ligase [ADP-forming] subunit beta, mitochondrial	Sucla2	1.53304	1.72894	0.886694	-0.173492	0.025004	14	14	Q9Z2I9
Proteasome subunit alpha type-4;Proteasome subunit alpha type	Psma4	0.990586	0.888071	1.11544	0.157607	0.0252639	6	6	Q9R1P0;E9PW69;E9Q0X0
Dihydropyrimidinase-related protein 2	Dpysl2	1.07566	1.16369	0.924353	-0.113485	0.0258333	25	22	O08553
Protein SET	Set	0.680122	0.567746	1.19793	0.260548	0.0259119	5	5	Q3T9S3;Q9EQU5;Q9EQU5-2;A2BE93;A2BE92;Q9EQU5-3
SAM domain and HD domain-containing protein 1	Samhd1	1.37694	1.09272	1.2601	0.333542	0.0259436	10	10	F8WJE0;Q60710;E9Q0K6;F6TVP2;E9PYG9;Q6ZQM3
Eukaryotic translation initiation factor 1;Eukaryotic translation initiation factor 1b	Gm6900;Eif1;Gm16378;Eif1b	0.89395	0.77201	1.15795	0.211575	0.025949	6	6	G3UW42;P48024;Q4V9T8;D3YXK8;Q9CXU9
Rho-associated protein kinase 2	Rock2	1.21731	1.01268	1.20207	0.265518	0.0260585	11	9	E9PYM9;F8VPK5;P70336-2;P70336;E9Q9W8
	Ogdhl	1.54745	1.69918	0.910704	-0.134946	0.026103	27	21	E9Q7L0
Cytochrome c oxidase subunit 6C	Cox6c	0.804331	0.871509	0.922918	-0.115726	0.0263336	6	6	Q9CPQ1;D3Z6E1
	Arfip1	0.872353	0.974109	0.895539	-0.159171	0.0265681	8	8	G5E8V9;E9Q3G5;A2RSX9;E9QAY5
Twisted gastrulation protein homolog 1	Twsg1	1.58238	2.53535	0.624127	-0.680089	0.0268034	2	2	Q9EP52
Ubiquitin-protein ligase E3C	Ube3c	0.715962	0.882223	0.811543	-0.30126	0.0273464	10	10	Q80U95
Thioredoxin domain-containing protein 5	Txndc5	1.07532	1.15194	0.933486	-0.0992995	0.0274107	11	11	Q3TEE8;Q91W90;E9PXX7
Serine/threonine-protein phosphatase;Serine/threonine-protein phosphatase 5	Ppp5c	0.745673	0.8375	0.890356	-0.167546	0.0277364	9	9	G5E819;Q60676;F7BX26
RNA-binding protein Raly	Raly;C130057N11Rik	0.604796	0.489936	1.23444	0.303855	0.0280414	6	6	Q64012;A2AU62;Q3U3F6;Q64012-2;A2AU61;A2AU60
Interferon-induced, double-stranded RNA-activated protein kinase	Eif2ak2	1.23826	0.984961	1.25717	0.330176	0.0280854	2	2	Q03963
Rap1 GTPase-activating protein 2	Rap1gap2	1.288	1.45637	0.884391	-0.177244	0.0287627	11	10	Q5SVL6;Q5SVL6-2;A2ALS3;Q5SUE5
Adenosylhomocysteinase	Ahcy	1.20441	1.10362	1.09133	0.126083	0.0289508	22	22	P50247;Q3TF14;A2ALT5
Calnexin	Canx	1.0936	1.2493	0.87537	-0.192035	0.0289714	35	35	P35564;Q5SUC3
Acyl-CoA-binding protein	Dbi	0.832596	0.920141	0.904857	-0.144238	0.0292813	6	6	P31786;Q548W7;F6ZM12;Q4VWZ5;F6WUQ1;D3Z563
Protein FAM98B	Fam98b	1.02485	0.858961	1.19313	0.254748	0.029487	6	5	Q80VD1
Eukaryotic translation initiation factor 6	Eif6	0.732891	0.58083	1.2618	0.335483	0.029662	3	3	O55135;Q545K4;A6PWZ2;B1AZQ4;D6RJJ3;D6RG53
Transmembrane emp24 domain-containing protein 4	Tmed4	1.31853	1.20281	1.09621	0.132522	0.0298683	9	8	Q8R1V4;Q5SVW9
THO complex subunit 4;RNA and export factor-binding protein 2	Alyref;Alyref2;Refbp2	0.764014	0.66522	1.14851	0.199768	0.0298779	4	4	O08583;G3X9I4;Q9JJW6;Q9JJW6-2;O08583-2
Structural maintenance of chromosomes flexible hinge domain-containing protein 1	Smchd1	0.852963	0.647273	1.31778	0.398109	0.0299385	10	10	Q6P5D8
STE20-like serine/threonine-protein kinase	Slk	1.0924	0.985157	1.10886	0.149076	0.030545	4	4	O54988;A2RRK3;O54988-2
A-kinase anchor protein 8	Akap8	0.608753	0.542501	1.12212	0.166231	0.0306408	2	2	Q059U9;Q9DBR0
Phytanoyl-CoA hydroxylase-interacting protein-like	Phyhipl	0.544342	0.702893	0.774431	-0.368792	0.030829	6	6	Q8BGT8;F7D3N3;F6U6Z2;Q8BGT8-2
Adipocyte plasma membrane-associated protein	Apmap	1.11853	1.01306	1.10411	0.142884	0.0308582	11	11	Q9D7N9
Proteasome subunit beta type;Proteasome subunit beta type-6	Psmb6	1.01395	0.868838	1.16702	0.222827	0.0311028	5	5	A2CFA7;Q60692
DNA-(apurinic or apyrimidinic site) lyase;DNA-(apurinic or apyrimidinic site) lyase, mitochondrial	Apex1	0.793872	0.573991	1.38307	0.467878	0.031204	5	5	P28352;Q544Z7;F6QA74;D3Z124
Short-chain specific acyl-CoA dehydrogenase, mitochondrial	Acads	2.44498	2.94275	0.830849	-0.267342	0.0312651	8	8	Q07417;F6RAZ3
	Tpr	0.695858	0.615544	1.13048	0.176931	0.031304	30	30	E9PZZ3;F6ZDS4;Q7M739;F6RX08
Inosine triphosphate pyrophosphatase	Itpa	1.06322	0.876076	1.21362	0.279312	0.0315457	6	6	Q60I30;Q9D892
Synapse-associated protein 1	Syap1	1.43542	1.34576	1.06662	0.0930518	0.0315798	7	7	A2AMX4;Q9D5V6
Small nuclear ribonucleoprotein Sm D2	Snrpd2;Gm5848;Gm5449;Gm10120	0.709351	0.639428	1.10935	0.149718	0.0316475	8	8	P62317;Q14AF6;E9Q2T1;D3Z5N9;D3Z426
Mitochondrial glutamate carrier 1	Slc25a22	1.12994	1.20248	0.939675	-0.0897667	0.0318632	7	7	Q9D6M3;E9Q6M6;E9PY45;E9PV90;E9Q579;Q9DB41;Q9DB41-2;F6UUQ1;G3UX09;G3UY41
26S proteasome non-ATPase regulatory subunit 3	Psmd3	0.964518	0.930007	1.03711	0.0525666	0.0318662	24	24	P14685;F7B7L8
DNA (cytosine-5)-methyltransferase 1	Dnmt1	0.416006	0.25972	1.60175	0.679647	0.0318977	11	11	P13864;P13864-2
Clusterin;Clusterin beta chain;Clusterin alpha chain;Clusterin	Clu	1.06067	0.941527	1.12654	0.171901	0.0322315	10	10	Q06890;Q549A5;E9Q8Y5;E9PXG5;E9PUU2;E9Q9B8;E9Q2G2
Carbonyl reductase [NADPH] 1	Cbr1	1.78128	1.53868	1.15767	0.211221	0.0323236	10	9	B2RXY7;P48758
Heat shock-related 70 kDa protein 2	Hspa2	2.13236	1.78935	1.1917	0.253015	0.0324571	20	9	P17156
		1.51586	1.78227	0.850522	-0.233579	0.0324721	33	3	P52480-2
U2 small nuclear ribonucleoprotein B	Snrpb2	0.787142	0.708012	1.11176	0.15285	0.0325072	6	5	A2BGM2;Q9CQI7;A2CES4
Acyl-coenzyme A thioesterase 2, mitochondrial;Acyl-coenzyme A thioesterase 1	Acot2;Acot1	3.1109	2.76765	1.12402	0.168671	0.0326798	6	6	Q9QYR9;O55137;H7BX55;Q14DI6;Q8BWN8;B2RTE4;Q32Q92;Q32Q92-2
UPF0568 protein C14orf166 homolog	2700060E02Rik	0.975458	0.813507	1.19908	0.261925	0.0328647	8	8	Q4VA29;Q9CQE8
Probable ATP-dependent RNA helicase DDX17	Ddx17	0.917413	0.847552	1.08243	0.114269	0.0329246	30	23	Q3U741;Q501J6;Q501J6-2
CTP synthase 2	Ctps2	1.41111	1.5111	0.93383	-0.0987687	0.0329276	8	5	A2AEQ7;P70303;A2AEQ8;P70303-2;A2AEQ6;P70303-3
CD63 antigen	Cd63	1.22587	1.02026	1.20153	0.264869	0.0329466	2	2	P41731;Q549D0
Coatomer subunit beta	Copb1	1.83621	1.72962	1.06163	0.086276	0.0329655	31	31	Q9JIF7;E9PYW9
Proteasome activator complex subunit 2	Psme2	1.11145	1.23678	0.898664	-0.154146	0.0334203	8	7	P97372;Q5SVP3;G3X9V0;E0CZ90
40S ribosomal protein S25	Gm4963;Rps25	0.916257	0.822704	1.11371	0.155379	0.033421	5	5	D3YXG3;P62852;Q58EA6
Neuroendocrine convertase 1	Pcsk1	1.01056	1.18068	0.855914	-0.224463	0.0335073	15	15	P63239;Q32MU0
Nuclear RNA export factor 1	Nxf1	1.06754	0.729541	1.4633	0.549229	0.0342074	6	6	Q99JX7
Protein disulfide-isomerase A4	Pdia4	1.77143	2.00568	0.883207	-0.179177	0.0342176	36	36	P08003
AH receptor-interacting protein	Aip	0.975741	0.730914	1.33496	0.416797	0.0342373	6	6	O08915;D3YW40
Brain protein 44	Brp44	1.15552	1.29074	0.895238	-0.159656	0.0343273	6	5	Q9D023;E9Q7J2
	Nt5dc2	0.414299	0.470571	0.880418	-0.18374	0.0343526	10	10	Q91X76
Acetyl-CoA carboxylase 1;Biotin carboxylase	Acaca	0.592216	0.681715	0.868715	-0.203045	0.0344334	15	15	Q5SWU9-2;E9PUB1;Q5SWU9;E9Q4Z2;D3Z0B3
2-oxoisovalerate dehydrogenase subunit beta, mitochondrial	Bckdhb	1.35154	1.18113	1.14428	0.194436	0.0344818	3	3	Q6P3A8;Q6P3A8-2
Nucleolar transcription factor 1	Ubtf	0.728459	0.644692	1.12993	0.176238	0.0346442	15	15	A2AWT5;P25976;A2AWT7;A2AWT6;P25976-2;E9Q4A8;G3UZW9
Syntaxin-16	Stx16	0.940464	0.764354	1.2304	0.299132	0.0348442	3	3	E9QM25;Q8BVI5;Q8C0W8;F7CJY7;B7ZCB8;B7ZCB9
Eukaryotic translation initiation factor 3 subunit E	Eif3e	1.15662	1.0918	1.05937	0.0832064	0.0352476	16	16	P60229;Q3UIG0
Replication protein A 70 kDa DNA-binding subunit	Rpa1	0.238041	0.302408	0.787152	-0.345286	0.0355648	12	12	Q5SWN2;Q8VEE4
RNA-binding protein FUS	Fus	1.01965	0.947072	1.07663	0.106528	0.0356041	10	8	P56959;Q564D0;Q8CFQ9;G3UXT7;Q91VQ2;G3UZD2
Exocyst complex component 4	Exoc4	1.2257	1.40187	0.874332	-0.193747	0.0360612	7	7	Q69ZD1;O35382;Q9CXE1;Q8C391
UDP-glucose 6-dehydrogenase	Ugdh	1.28084	0.333109	3.84511	1.94302	0.0362886	6	6	O70475;Q3TS38;D3Z3F7;D3YXP9;F6ZQT4
H/ACA ribonucleoprotein complex subunit 4	Dkc1	1.38773	1.16425	1.19195	0.253326	0.0363396	7	7	Q9ESX5;B7ZCL7;F6S1S5;F6YUI5;A2AN81
2-oxoglutarate dehydrogenase, mitochondrial	Ogdh	1.5477	1.66424	0.929974	-0.104738	0.036348	32	26	Q60597;Q60597-3;Q60597-4;Q60597-2;E9Q1C6;Q5SVY0;Q5SVY1
BolA-like protein 1	Bola1	1.27264	1.16448	1.09288	0.128139	0.0364519	4	4	Q9D8S9
DNA topoisomerase 1	Top1	0.865295	0.788348	1.09761	0.134359	0.036589	14	14	Q04750;F8WIA2;Q8R4U6
Histone H2A;Histone H2A type 2-A;Histone H2A type 2-C	Hist2h2aa1;Hist2h2ac;Hist1h2al	1.90535	1.64703	1.15684	0.210189	0.0366564	6	2	B2RWH3;Q6GSS7;Q149V4;Q64523;F8WIX8
Coatomer subunit beta	Copb2	1.81461	1.74449	1.0402	0.0568542	0.0367714	35	35	O55029
Carboxypeptidase D	Cpd	0.78649	0.853318	0.921685	-0.117655	0.0368332	20	20	O89001
Protein hid-1 homolog	C630004H02Rik	2.89947	2.49475	1.16223	0.216894	0.0371441	13	13	Q8R1F6;Q3UU20;Q8R1F6-2;F6RGN1
26S protease regulatory subunit 6A	Psmc3	1.03323	0.976971	1.05759	0.0807738	0.0375284	17	17	B7ZCF1;O88685;A2AGN7;F6Q2E3
Extended synaptotagmin-1	Esyt1	0.514039	0.561742	0.91508	-0.12803	0.037839	29	29	Q3U7R1;Q3U7R1-2
Armadillo repeat-containing protein 10	Armc10	1.15567	1.03396	1.11771	0.160549	0.0381478	5	5	Q9D0L7;Q9D0L7-2;D3Z5T2
Fatty acid-binding protein, epidermal	Fabp5	0.49188	0.350157	1.40474	0.490304	0.0382164	5	5	Q05816;Q497I3;E9Q964
Ataxin-10	Atxn10	0.967613	0.912851	1.05999	0.0840508	0.0382657	13	13	P28658;F8WGN7
Peptidyl-prolyl cis-trans isomerase NIMA-interacting 1	Pin1	0.740717	0.636968	1.16288	0.217702	0.0383407	2	2	Q9QUR7
Acyl-CoA:lysophosphatidylglycerol acyltransferase 1	Lpgat1	0.989949	1.10136	0.898842	-0.15386	0.0384255	2	2	F8WHJ5;E9QL80;Q91YX5;D3YVK0
Ubiquinol-cytochrome c reductase complex chaperone CBP3 homolog	Uqcc	1.30686	1.54952	0.843397	-0.245717	0.038523	2	2	Q9CWU6;A6PWX9;F6V305;A6PWX8;A6PWX7;A6PWX5;D6RJ83
NADH dehydrogenase [ubiquinone] 1 beta subcomplex subunit 3	Ndufb3	1.714	1.87747	0.912931	-0.131423	0.0385807	3	3	Q9CQZ6
Nucleolin	Ncl	0.530317	0.453123	1.17036	0.226952	0.0388293	23	23	P09405
Pre-mRNA-processing factor 6	Prpf6	0.8636	0.737565	1.17088	0.227593	0.0389224	14	14	Q91YR7;Q91YR7-2
AP-3 complex subunit sigma-1	Ap3s1;Ap3s1-ps2	0.950043	0.793561	1.19719	0.259652	0.0391471	4	4	Q3U8S0;Q9DCR2;G3XA56
Signal peptidase complex catalytic subunit SEC11A	Sec11a	1.45053	1.55069	0.935409	-0.0963302	0.0392031	7	7	D3YTS1;D3Z569;Q9R0P6;D3YWT0
Heterogeneous nuclear ribonucleoprotein U-like protein 2	Hnrnpul2	1.08696	1.01124	1.07488	0.104173	0.03925	20	20	F8VPM4;Q00PI9
Osteoclast-stimulating factor 1	Ostf1	1.16244	1.00748	1.15381	0.206405	0.0397009	2	2	Q62422
NADH dehydrogenase [ubiquinone] 1 alpha subcomplex subunit 6	Ndufa6	1.5235	1.63611	0.931172	-0.10288	0.0398703	4	4	Q9CQZ5
Myosin light polypeptide 6	Myl6;Gm8894	1.63099	1.47526	1.10556	0.144779	0.0399659	8	8	Q60605;Q60605-2;Q642K0;E9QLM0;Q8CI43
Spliceosome RNA helicase Ddx39b	Ddx39b	0.707177	0.637472	1.10935	0.149709	0.0400175	20	8	Q9Z1N5;G3UXI6
	Tha1	2.42411	4.77866	0.507278	-0.979151	0.040754	5	5	Q6XPS7
PCTP-like protein	Stard10	1.00687	1.14663	0.878112	-0.187523	0.0408235	9	9	E9PVP0;E9PVT5;Q0VG22;Q9JMD3;G3UW37;G3UY87;G3V020;G3UY59;G3UYM0;G3UZB9;G3UYN6
Growth hormone-inducible transmembrane protein	Ghitm	1.64884	1.25607	1.3127	0.392535	0.0409751	3	3	Q91VC9
Exosome complex exonuclease RRP44	Dis3	0.654239	0.544711	1.20108	0.264327	0.0409921	7	7	Q9CSH3;E9Q1E0
Peptidyl-prolyl cis-trans isomerase NIMA-interacting 4	Pin4	0.917791	0.377492	2.43129	1.28172	0.041639	3	3	Q9CWW6
Synaptotagmin-like protein 4	Sytl4	1.45888	1.67855	0.869131	-0.202354	0.0417917	25	24	Q549X6;Q9R0Q1;Q9R0Q1-2;Q9R0Q1-3;G3UYC6;E9QKS6;Q99N50-2;Q99N50-6;Q99N50-8
Heterogeneous nuclear ribonucleoprotein D-like	Hnrpdl	0.804735	0.741103	1.08586	0.11884	0.0418129	9	8	D3YTQ3;F6VQH5;Q9Z130
Hippocalcin-like protein 1	Hpcal1	0.854588	0.787687	1.08493	0.117607	0.0418678	9	6	P62748
Dyslexia-associated protein KIAA0319-like protein	Kiaa0319l	1.21113	1.04213	1.16217	0.216818	0.0419353	2	2	Q8K135-2;Q8K135
Arfaptin-2	Arfip2	1.41036	1.13586	1.24167	0.312278	0.0419575	6	6	Q8K221;D3Z2F3;D6RHM6
Xaa-Pro aminopeptidase 1	Xpnpep1	0.954856	0.884184	1.07993	0.110937	0.042003	6	6	Q3UKF5;Q6P1B1;Q3TL27
RNA-binding protein 25	Rbm25	0.874233	0.786285	1.11185	0.152966	0.0423789	11	11	B2RY56;B2RY56-2;B2RY56-3
Proliferating cell nuclear antigen	Pcna	0.15656	0.137599	1.1378	0.186246	0.0425393	11	11	P17918;Q542J9;E9Q7Z3
Sulfide:quinone oxidoreductase, mitochondrial	Sqrdl	4.59564	5.92182	0.776052	-0.365775	0.0425618	17	17	Q9R112;F6ZKZ3;H3BLH2
Calcium-binding mitochondrial carrier protein SCaMC-2	Slc25a25	1.2784	1.52946	0.835851	-0.258683	0.0430755	3	3	A2ASZ8-3;A2ASZ8-2;A2ASZ8-5;A2ASZ8-4;A2ASZ8
Paraspeckle component 1	Pspc1	0.899375	0.693356	1.29713	0.375326	0.0430894	6	6	Q8R326;Q8R326-2;F7D909
Glycosaminoglycan xylosylkinase	Fam20b	1.03274	1.34355	0.768665	-0.379573	0.0433391	5	5	Q8VCS3
AP-2 complex subunit sigma	Ap2s1	0.686107	0.772825	0.887791	-0.171708	0.0438723	4	4	P62743;Q3UJ76;Q7TT10
CD9 antigen	Cd9	0.962376	1.16453	0.826407	-0.275075	0.0439157	2	2	P40240
	Slc25a1	3.28296	3.79793	0.864408	-0.210216	0.0440697	6	6	Q8JZU2;F6VVY4
GPI inositol-deacylase	Pgap1	0.951848	0.89036	1.06906	0.0963424	0.0442741	17	17	Q3UUQ7
Tumor suppressor p53-binding protein 1	Trp53bp1;Tp53bp1	0.78152	0.609216	1.28283	0.359329	0.0447373	6	6	A2AU91;P70399;A2AU89;E9QL34;P70399-3;P70399-2;A2AU90;F6ZRL3
ATP synthase gamma chain;ATP synthase subunit gamma, mitochondrial	Atp5c1	1.25379	1.33712	0.937679	-0.0928332	0.0449542	11	11	Q3UD06;Q91VR2;Q8C2Q8;A2AKU9;A2AKV3;A2AKV2;A2AKV1;A2AKV0
H-2 class I histocompatibility antigen, D-B alpha chain;H-2 class I histocompatibility antigen, L-D alpha chain	H2-D1;H2-L	2.13382	1.75799	1.21378	0.279512	0.0454978	11	8	E9QQ06;P01899;Q792Z7;P01897;E9PWT4;Q8HWB2;D3Z577;E9Q3M8;P01898;G3UXE9;E9Q0G4;A7VMS6;O19441;P01900;E9PX63;P01895;P01895-2;P14427;P01896;Q4KN81;G3UXN9;G3UY84;E9PV42
Thioredoxin	Txn1;Txn	0.615004	0.653827	0.940622	-0.0883132	0.0459124	7	7	A2AV97;P10639
Voltage-dependent anion-selective channel protein 1	Vdac1	1.32201	1.43395	0.921936	-0.117262	0.0459473	14	14	Q60932;Q60932-2;F2Z471
Serine/threonine-protein phosphatase 2A 55 kDa regulatory subunit B delta isoform	Ppp2r2d	1.64341	1.46678	1.12042	0.16404	0.0460702	4	3	Q925E7;F6RV17;G3UXS9;G3UZP6
Peptidyl-prolyl cis-trans isomerase FKBP5	Fkbp5	1.09608	0.974933	1.12426	0.168978	0.0460914	7	7	Q4FJN2;Q64378;B8JJC2
U2 small nuclear ribonucleoprotein A	Snrpa1	0.889395	0.784668	1.13347	0.180742	0.0460967	6	6	P57784;G5E883
Probable phospholipid-transporting ATPase IA	Atp8a1	1.74525	1.91177	0.912897	-0.131475	0.0462157	13	13	Q8BR88;F6WYQ5;P70704;Q3U9N5;F6Q8P7;E9Q4J5
Sorting nexin-2	Snx2	0.98611	1.06085	0.929547	-0.1054	0.0462434	19	17	Q9CWK8
NADH dehydrogenase [ubiquinone] 1 alpha subcomplex subunit 2	Ndufa2	1.38972	1.59244	0.872699	-0.196445	0.0463191	4	4	Q9CQ75
NHP2-like protein 1	Nhp2l1	0.697921	0.564642	1.23604	0.305727	0.0465715	4	4	Q9D0T1;E9PZS4
Leucine-rich repeat-containing protein 40	Lrrc40	0.794987	0.91636	0.867549	-0.204983	0.0465865	5	5	Q9CRC8;D6RHB1;F6RDA7;F6RGS7
Transforming protein RhoA	Rhoa;Rhoc	1.70813	1.39564	1.2239	0.291491	0.0467014	8	3	Q4VAE6;Q9QUI0;H3BL56;Q9CR99;P62746;Q4FJM5
Proteasome subunit beta type-1;Proteasome subunit beta type	Psmb1	1.17092	1.07607	1.08814	0.121871	0.0467326	5	5	O09061;Q6RI64
Casein kinase I isoform alpha	Csnk1a1	1.22095	1.05511	1.15718	0.210611	0.04705	6	6	E9PWB2;E9Q3W1;E9Q2U6;Q8BK63;E9Q4G7;H7BXB1;Q6PJ87;Q8BK63-2;F6YBC9
Maleylacetoacetate isomerase	Gstz1	2.84568	3.23031	0.880931	-0.182899	0.0471249	9	9	Q9WVL0
Replication factor C subunit 4	Rfc4	0.335174	0.188173	1.7812	0.832851	0.0477507	4	4	Q3UI84;Q99J62;D6RGM1
RING finger protein 114	Rnf114	1.03554	0.939205	1.10257	0.140871	0.0485691	3	3	A2A462;Q9ET26;E9Q233
Serine/threonine-protein kinase VRK1	Vrk1	0.346189	0.266542	1.29882	0.377197	0.0486463	7	7	Q80X41;Q3UWH3;Q80X41-3;Q80X41-5;Q80X41-2
Signal recognition particle receptor subunit alpha	Srpr	1.22107	1.05949	1.15251	0.204776	0.0492187	17	17	Q9DBG7;F6VF36
V-type proton ATPase catalytic subunit A	Atp6v1a	0.737988	0.783511	0.941899	-0.0863562	0.0492289	24	24	P50516;P50516-2;D3Z1B9;D3YWH3;D3YZ23
Ubiquitin-like domain-containing CTD phosphatase 1	Ublcp1	0.794855	0.655802	1.21204	0.277431	0.0493219	4	4	Q8BGR9;Q8BGR9-2
Cytochrome c, somatic	Gm10108;Cycs	0.251365	0.308158	0.815702	-0.293886	0.0499206	6	6	G3UWG1;P62897;Q56A15;G3UW49;CON__P62894
Rab3 GTPase-activating protein non-catalytic subunit	Rab3gap2	1.24961	1.53484	0.814163	-0.29661	0.0499862	15	15	E9QKE4;Q8BMG7;Q8BMG7-2
V-set and transmembrane domain-containing protein 2-like protein	Vstm2l	1.22992	0.835076	1.47282	0.558585	0.0500127	4	4	A2ACD2;Q6PDS0
Nuclease-sensitive element-binding protein 1	Ybx1	0.553428	0.485302	1.14038	0.189513	0.050091	6	3	P62960;Q3UBT1;A2BGG7
Putative RNA-binding protein 3	Rbm3	0.431412	0.356495	1.21015	0.275184	0.0504278	5	5	O89086;Q545K5;Q8BG13;Q5RJV3
Sorting nexin-9	Snx9	1.15641	1.0689	1.08187	0.113526	0.0505871	5	5	Q91VH2;E9QNH3
Eukaryotic translation initiation factor 2 subunit 3, X-linked	Eif2s3x	0.95947	0.911104	1.05309	0.074622	0.0510893	15	4	Q3TML6;Q9Z0N1;A2AAW9
Unconventional myosin-Ic	Myo1c	2.51735	2.09902	1.1993	0.26219	0.0511399	16	16	Q9WTI7;Q9WTI7-3;Q9WTI7-2;Q9WTI7-4;F8WIE8
Transcriptional repressor p66-beta	Gatad2b	1.07375	0.880127	1.21999	0.286875	0.0513925	3	3	Q8VHR5;Q8VHR5-2
CAAX prenyl protease 1 homolog	Zmpste24	0.909641	0.991857	0.917109	-0.124835	0.0513925	12	12	B9EHY2;Q80W54
ERO1-like protein beta	Ero1lb	1.33802	1.61666	0.827645	-0.272917	0.0514648	22	21	Q8R2E9
Vacuolar protein sorting-associated protein 13C	Vps13c	2.17821	1.90622	1.14269	0.192428	0.0515371	30	30	A1ILG8;Q8BX70;Q8BX70-2;E9QLN1;Q8BX70-3;A1ILH0;A1ILH1
Selenoprotein T	Selt	1.34754	1.63858	0.822383	-0.282118	0.0517047	3	3	P62342
Thimet oligopeptidase	Thop1	1.10273	0.969611	1.13729	0.185602	0.0519374	12	12	Q8C1A5
Pre-mRNA-splicing factor CWC22 homolog	Cwc22;OTTMUSG00000013393;Gm13695	0.883397	0.720719	1.22572	0.293625	0.0519948	2	2	B1AYU5;Q8C5N3;B1AYU7;B1AYU6;Q8C5N3-2;A2AK42;A2AK44;B1AYU4
OCIA domain-containing protein 2	Ociad2	3.00012	3.77092	0.795594	-0.329896	0.0523962	6	6	Q9D8W7
S-methyl-5-thioadenosine phosphorylase	Mtap	1.31878	1.6148	0.816683	-0.292152	0.0524481	7	7	A2ANM4;Q9CQ65
E3 SUMO-protein ligase RanBP2;Putative peptidyl-prolyl cis-trans isomerase	Ranbp2	0.706669	0.671997	1.0516	0.0725798	0.0527521	25	25	Q9ERU9
Vacuolar protein sorting-associated protein 45	Vps45	0.94453	0.884928	1.06735	0.0940365	0.05297	6	6	P97390
ATP synthase subunit g, mitochondrial	Atp5l;Atp5l-ps1	3.57386	3.81537	0.936701	-0.0943399	0.0530408	4	4	Q9CPQ8;F2Z452
Protein lin-7 homolog C	Lin7c	0.651919	0.761657	0.855922	-0.224449	0.0530457	6	4	A2ARI2;O88952;O88951
Tyrosine-protein kinase CSK	Csk	2.20803	2.46558	0.895542	-0.159167	0.0534011	3	3	P41241
Casein kinase I isoform epsilon;Casein kinase I isoform delta	Csnk1d;Csnk1e	1.17851	1.04116	1.13192	0.178772	0.053655	2	2	Q3USK2;A8Y308;Q9JMK2;A2ABP1;Q9DC28;Q3UBT6;Q9DC28-2;Q3TYE1;F7A4U8;A8Y2Z9
AFG3-like protein 2	Afg3l2	1.5316	1.79676	0.852423	-0.230358	0.0536908	14	12	Q8JZQ2;Q3UDQ7
DNA topoisomerase 2-beta	Top2b	0.856464	0.785854	1.08985	0.124131	0.0550035	19	12	Q64511;F6U5K2;F6XX57;F6V2E8
UPF0577 protein KIAA1324-like homolog	9330182L06Rik	1.10425	0.943045	1.17094	0.227668	0.0550225	6	6	B9EHI9;Q3UZV7;Q3UZV7-2;Q3UZV7-3;E9PUJ3;Q3UZV7-5
N-alpha-acetyltransferase 38, NatC auxiliary subunit	Naa38	0.687606	0.457239	1.50382	0.588634	0.0550237	3	3	Q6ZWM4
Trafficking protein particle complex subunit 4	Trappc4	1.25843	1.13432	1.10941	0.149797	0.055025	4	4	Q544R8;Q9ES56;Q3V493
Estradiol 17-beta-dehydrogenase 12	Hsd17b12	1.14763	0.953029	1.20419	0.268066	0.0554179	10	10	O70503;Q0VGQ1;O70503-2
Solute carrier family 12 member 9	Slc12a9	0.718172	0.55283	1.29908	0.377493	0.0554421	2	2	Q99MR3
Syntaxin-binding protein 5	Stxbp5	2.5338	1.80267	1.40558	0.491167	0.0554536	6	6	D3Z6W8;Q8K400;D3Z079;D3Z2Q2;Q8K400-2;Q5DQR4;Q5DQR4-3;Q5DQR4-2;Q5DQR4-4;H7BXB0;Q5DQR4-5;F8WHS5;Q5DQR4-6;F6WXQ4
Protein O-glucosyltransferase 1	Poglut1	1.33651	1.60009	0.835272	-0.259682	0.0555367	2	2	Q8BYB9;E9Q3R0
Cell division cycle protein 16 homolog	Cdc16	0.653259	0.748809	0.872397	-0.196943	0.055584	8	8	Q3TI84;Q8R349
CDGSH iron-sulfur domain-containing protein 1	Cisd1	1.2058	1.42114	0.848474	-0.237058	0.055829	5	5	Q91WS0
Insulin-degrading enzyme	Ide	0.798667	0.723258	1.10426	0.143084	0.0561901	13	13	Q9JHR7;F6RPJ9
Ubiquitin-like protein 4A	Ubl4a;Ubl4	0.78665	0.947116	0.830574	-0.267819	0.0562795	6	6	P21126;Q3UK94;F8WHM4
Pyruvate dehydrogenase E1 component subunit beta, mitochondrial	Pdhb	2.52692	2.7058	0.93389	-0.0986752	0.0566383	11	11	Q9D051
Wings apart-like protein homolog	Wapal	1.01815	0.363691	2.79949	1.48516	0.0568971	3	3	Q65Z40;B7ZP47;F6YCH1
28S ribosomal protein S29, mitochondrial	Dap3	0.728869	0.644272	1.13131	0.17799	0.0569521	5	5	G3X9M0;Q9ER88;Q9ER88-2;G3UWZ6;G3UWM7;G3UZC0;G3UWJ4;G3UWR5;G3UYM6;G3UYP3
Zinc finger RNA-binding protein	Zfr	0.724791	0.664904	1.09007	0.124419	0.0571202	10	10	O88532;B2RUG7;F6QJP7;F6V459
Signal peptidase complex catalytic subunit SEC11C	Sec11c	2.09938	2.34957	0.893517	-0.162433	0.0571742	7	7	Q9D8V7;D6RFV4;D3Z5H3
Islet amyloid polypeptide	Iapp	2.47357	3.04096	0.813417	-0.297932	0.0574183	5	5	P12968
Insulin-like growth factor-binding protein 7	Igfbp7	2.34106	4.36155	0.53675	-0.897679	0.057678	4	4	E9Q5D9;F8WH23;Q61581;F8WII5
Serine-threonine kinase receptor-associated protein	Strap	0.9107	0.739152	1.23209	0.301105	0.058031	11	11	B2RUC7;Q9Z1Z2
Ribonuclease inhibitor	Rnh1	1.29851	1.18475	1.09602	0.132274	0.0580938	13	13	Q91VI7
TBC1 domain family member 15	Tbc1d15	1.0545	0.885843	1.19039	0.251436	0.0583042	13	13	Q9CXF4
Protein Noxp20	Fam114a1	1.63189	1.42183	1.14774	0.198795	0.0584386	8	8	Q9D281;D3Z2J2
Eukaryotic translation initiation factor 3 subunit J	Eif3j	1.06001	0.991815	1.06876	0.0959349	0.0586976	4	4	Q66JS6;Q3UGC7
Glypican-4;Secreted glypican-4	Gpc4	1.16429	1.51773	0.767126	-0.382465	0.0595374	6	6	B1AV07;P51655;Q8R3X6;Q3V1C9;Q9R087
Syntaxin-3	Stx3	2.20036	2.42801	0.90624	-0.142035	0.0596129	3	3	Q3TBP0;Q64704;Q8R1B7;Q64704-2;Q64704-3;E9QN34;Q64704-5;Q64704-6;Q64704-4
Stomatin-like protein 2	Stoml2	1.35545	1.2702	1.06712	0.0937162	0.0597916	4	4	A2AG40;Q99JB2;A2AG41;F6WI02;A2AG39
Heterogeneous nuclear ribonucleoprotein K	Hnrnpk;Gm7964	1.3753	1.28351	1.07151	0.0996518	0.0598536	21	21	E9PVM4;E9Q8D6;B2M1R6;P61979-3;H7BXB7;P61979-2;Q5FWJ5;P61979;D3Z5X4;H3BLL4;H3BKD0;D3YWG1;H3BK96;H3BKI8;H3BLP7;Q8BT23;H3BJS9;H3BJ43
Secretogranin-2;Secretoneurin	Scg2	2.68834	2.35729	1.14044	0.189586	0.0601105	24	2	Q03517
Annexin A2;Annexin	Anxa2	4.48192	3.48905	1.28457	0.361283	0.0604171	16	16	P07356;Q542G9;B0V2N7;B0V2N5;B0V2N8
NEDD8-activating enzyme E1 regulatory subunit	Nae1	0.756093	1.06884	0.707396	-0.49941	0.0605717	5	5	Q3UK27;Q8VBW6;E0CZE0;Q3TS59
	Eif2b3	0.952604	0.86046	1.10709	0.146768	0.0607799	6	6	B1AUN2;Q3UKV0;B1AUN3;A4FUS0;Q3T9T4
Glutaminase kidney isoform, mitochondrial	Gls	1.69976	1.20748	1.40769	0.493332	0.0615092	6	6	D3Z7P3;D3Z7P4;D3Z7P3-2;D3Z7P5;F6U529;F7B327
6-phosphogluconolactonase	Pgls	1.30942	1.10299	1.18715	0.247508	0.0616453	7	7	Q9CQ60;Q8CBG6;D3Z4X1;F6X8L5
Valine--tRNA ligase	Vars	0.888559	0.823515	1.07898	0.109673	0.0618401	33	33	Q790I0;Q9Z1Q9;G3UY93;G3UZ22;G3UYW2;G3UX02
Triosephosphate isomerase	Tpi1	0.610665	0.591088	1.03312	0.0470082	0.0618529	15	3	P17751
COMM domain-containing protein 9	Commd9	0.887165	0.822002	1.07927	0.110061	0.0622487	2	2	A2AVJ6;Q8K2Q0
Transducin beta-like protein 2	Tbl2	0.954752	1.14389	0.834654	-0.26075	0.0623677	7	7	Q9R099;D3YZH8;F8WI46
40S ribosomal protein S7	Rps7;Gm9493	0.887014	0.832042	1.06607	0.0923005	0.0627133	10	10	P62082;Q4FZE6;F6SVV1
Nuclear export mediator factor Nemf	Nemf	1.20376	0.980607	1.22757	0.295801	0.0629361	4	4	Q8CCP0;Q8CCP0-2;Q8CCP0-3;Q8CCP0-4
Far upstream element-binding protein 2	Khsrp	0.641721	0.584178	1.0985	0.135538	0.0632033	19	16	Q3U0V1
Fructose-bisphosphate aldolase;Fructose-bisphosphate aldolase A	Aldoa;Aldoart1;Aldoart2	1.06077	1.13178	0.937258	-0.0934817	0.0640074	20	19	A6ZI44;P05064;Q5FWB7;Q9CPQ9;D3YWI1;D3YV98;D3Z510;A6ZI47;Q3UER1;Q91Y97
Redox-regulatory protein FAM213A	5730469M10Rik;Fam213a	1.54355	1.69335	0.911536	-0.133628	0.0645639	7	7	Q3U125;Q9CYH2;D3Z252;D3Z398;D3YYG8;D3Z0A8;D3YWL4;D3Z143
28S ribosomal protein S30, mitochondrial	Mrps30	0.809096	0.593221	1.3639	0.447741	0.0645937	3	3	Q9D0G0
3-ketoacyl-CoA thiolase A, peroxisomal;3-ketoacyl-CoA thiolase B, peroxisomal	Acaa1a;Acaa1b	1.68418	1.56783	1.07421	0.103277	0.0649127	10	10	Q921H8;H3BKL5;H3BJZ9;Q8BLD7;Q3UKM0;Q8VCH0;H3BKA1;H3BJG8;H3BJC1
Trans-2,3-enoyl-CoA reductase	Tecr	0.662758	0.610701	1.08524	0.118016	0.0650624	8	8	Q52L67;Q9CY27;G3UWE1
28S ribosomal protein S22, mitochondrial	Mrps22	0.644765	0.529863	1.21685	0.283154	0.0650969	5	5	Q9CXW2
Fatty acid-binding protein, adipocyte	Fabp4	7.66858	4.62027	1.65977	0.730982	0.0651673	5	5	P04117;Q542H7
FACT complex subunit SPT16	Supt16h	0.426713	0.398507	1.07078	0.098661	0.0653762	15	15	G3X956;Q920B9
Vesicle-associated membrane protein 8	Vamp8	1.61687	1.38151	1.17036	0.226958	0.0656055	3	3	O70404
Contactin-associated protein like 5-3	Cntnap5c	0.616857	0.518739	1.18915	0.249927	0.0656221	2	2	Q0V8T7
Protein LYRIC	Mtdh	1.22899	1.30685	0.940422	-0.0886204	0.0657113	8	8	Q80WJ7;F6QHD1;E9PUX0;F6QFT1;F6ZSG0;F6ZQL0
Thioredoxin domain-containing protein 17	Txndc17	1.46864	1.38563	1.05991	0.0839387	0.0659508	3	3	Q9CQM5
Phosphoribosyl pyrophosphate synthase-associated protein 1	Prpsap1	1.15766	0.988004	1.17172	0.228623	0.0659538	7	6	B1AT82;Q9D0M1;B1AT84;B1AT83
Transferrin receptor protein 1	Tfrc	0.245931	0.283637	0.867062	-0.205792	0.0674466	12	12	Q542D9;Q62351;Q8C872
CDGSH iron-sulfur domain-containing protein 2	Cisd2	0.914609	0.979123	0.93411	-0.098335	0.0674637	4	4	Q9CQB5;D3Z3X4
Sorting and assembly machinery component 50 homolog	Samm50	1.16483	1.48233	0.78581	-0.347747	0.0674885	10	10	Q8BGH2
CUGBP Elav-like family member 1	Celf1	0.740304	0.605137	1.22337	0.290856	0.0676799	6	6	P28659-4;P28659;P28659-3;P28659-2
B-cell receptor-associated protein 29	Bcap29	1.04839	1.47672	0.709945	-0.494221	0.0679516	3	3	Q542A1;Q61334
Ubiquitin carboxyl-terminal hydrolase 5;Ubiquitin carboxyl-terminal hydrolase	Usp5	0.799928	0.842417	0.949563	-0.0746644	0.0679845	17	17	P56399;Q3U4W8;D3YYA5;D3Z4K7
Acidic leucine-rich nuclear phosphoprotein 32 family member A	Anp32a	1.06167	0.954264	1.11255	0.153875	0.0684321	11	9	O35381;D3Z7M9;D3YYE1;F6UFG6;Q64G17;E9Q148
Glutathione peroxidase 3;Glutathione peroxidase	Gpx3	5.00915	6.4681	0.774439	-0.368776	0.0687053	6	6	P46412;D3Z2Y7;D3Z7Y0;F2Z3Y2;E9QK84
T-complex protein 1 subunit zeta	Cct6a	0.75205	0.812738	0.925329	-0.111962	0.0687876	18	13	E9QPA6;P80317
Peptidyl-prolyl cis-trans isomerase FKBP9	Fkbp9	0.966459	1.17708	0.821065	-0.284432	0.0689287	5	5	Q9Z247
AP-2 complex subunit alpha-2	Ap2a2	0.968246	1.04992	0.922209	-0.116834	0.0690256	23	18	P17427;E9PWD0
TP53RK-binding protein	Tprkb	0.796356	0.745889	1.06766	0.0944526	0.0692309	2	2	Q8QZZ7;G3X9K8;D3Z5E8;D3YXX8
Gamma-glutamylaminecyclotransferase	A2ld1	1.77673	2.40876	0.737612	-0.439066	0.0692309	2	2	Q923B0;E0CX39;E0CZ04
Creatine kinase B-type	Ckb	1.8242	1.37912	1.32273	0.403516	0.070283	13	13	Q04447
Rab GDP dissociation inhibitor alpha	Gdi1	0.986105	1.05937	0.930841	-0.103393	0.0704061	23	17	P50396;B7FAU8
60S ribosomal protein L17	Rpl17-ps3;Gm10268;Rpl17;Gm10362	0.976355	0.915416	1.06657	0.0929783	0.0705489	10	10	F8VQL2;D3Z3R2;Q6ZWZ7;Q9CPR4;F6VWT4;B2RY53;F8VQM6;E9PWX3;F6YKV1
Selenide, water dikinase 1	Sephs1	1.16381	1.06572	1.09204	0.127027	0.0706155	5	5	A2AMN4;Q8BH69
Protein canopy homolog 3	Cnpy3	1.31124	1.48478	0.883121	-0.179317	0.0710624	9	9	B0V2V2;Q9DAU1;Q9DAU1-2;B0V2V1
Somatostatin;Antrin;Somatostatin-28;Somatostatin-14	Sst	38.0561	30.8935	1.23185	0.300824	0.0711033	2	2	P60041;Q545V6
Myosin-9	Myh9	1.57102	1.43996	1.09102	0.125673	0.0715583	88	71	Q8VDD5;F7AUR3;E9Q3T2;F2Z494
Cytosol aminopeptidase	Lap3	0.681163	0.643703	1.05819	0.0816049	0.0716952	19	19	Q9CPY7;Q9CPY7-2
Sister chromatid cohesion protein PDS5 homolog B	Pds5b	0.582429	0.496349	1.17343	0.230727	0.0722104	19	17	F8WHU5;Q4VA53-3;Q4VA53;Q4VA53-2
Cullin-associated NEDD8-dissociated protein 1	Cand1	1.23055	1.25894	0.977449	-0.0329062	0.0726073	38	36	Q6ZQ38;D3YWC5
F-actin-capping protein subunit alpha-1	Capza1	1.29548	1.066	1.21527	0.281279	0.0726909	5	2	P47753;Q5RKN9;E9PWZ5
Glyoxylate reductase/hydroxypyruvate reductase	Grhpr	1.60337	1.69827	0.94412	-0.0829585	0.0728987	6	6	Q3T9Z2;Q91Z53;D6REG4;B1AXQ0
Ribonucleoprotein PTB-binding 1	Raver1	0.935286	0.752479	1.24294	0.313756	0.0731156	4	4	Q9CW46;Q9CW46-2
Immunity-related GTPase family Q protein	Irgq	1.78812	1.49261	1.19798	0.260606	0.0734632	3	3	Q8VIM9
RNA binding motif protein, X-linked-like-1;RNA binding motif protein, X-linked-like-1, N-terminally processed	Rbmxl1	0.766428	0.713416	1.07431	0.103407	0.0735394	14	2	Q91VM5;Q9DAE2
PI-PLC X domain-containing protein 3	Plcxd3	0.544598	0.62553	0.870619	-0.199887	0.0737344	3	3	G3X9A7;Q8BLJ3;B2RPW5
Vacuolar protein-sorting-associated protein 36	Vps36	1.63335	1.5074	1.08355	0.115772	0.0738958	4	4	Q3TSR1;Q91XD6
Glutaminyl-peptide cyclotransferase-like protein	Qpctl	2.46116	2.09863	1.17275	0.229891	0.0741652	3	3	Q8BH73;Q8BH73-2
Putative oxidoreductase GLYR1	Glyr1	0.775002	0.688934	1.12493	0.169834	0.0743567	7	7	D3YYT1;Q922P9
60S acidic ribosomal protein P0	Rplp0;Gm8730	1.11081	1.06359	1.0444	0.06267	0.0746225	14	14	P14869;Q5M8R8;E9Q070;D3YVM5
Protein C10	Grcc10	1.19212	1.03448	1.15239	0.204624	0.0748342	3	3	O35127
Cytosolic non-specific dipeptidase	Cndp2	3.82352	4.66121	0.820285	-0.285803	0.0749394	7	7	Q9D1A2;F6XEL6
Synaptosomal-associated protein 47	Snap47	1.477	1.7191	0.85917	-0.218984	0.0749514	5	5	Q8R570;Q8R570-2;B2FDF6
Splicing factor U2AF 65 kDa subunit	U2af2	0.793633	0.75533	1.05071	0.0713649	0.0750914	9	9	P26369;Q3KQM4
Peroxisomal multifunctional enzyme type 2;(3R)-hydroxyacyl-CoA dehydrogenase;Enoyl-CoA hydratase 2	Hsd17b4	0.914081	0.772771	1.18286	0.242281	0.0755005	9	9	P51660
NADH dehydrogenase [ubiquinone] flavoprotein 1, mitochondrial	Ndufv1	1.47891	1.60264	0.922796	-0.115916	0.0757408	17	17	Q91YT0;D3YUM1;D3Z1U9;D3Z0K1;D3YXX5;D6RG60
BTB/POZ domain-containing protein KCTD12	Kctd12	2.5695	2.42243	1.06071	0.0850327	0.0757984	7	5	Q6WVG3
WD repeat-containing protein 44	Wdr44	0.769998	0.958266	0.803533	-0.315571	0.0758089	3	3	B1AXB8;Q6NVE8;Q6NVE8-2
Cullin-4B	Cul4b	0.904033	0.968002	0.933916	-0.0986346	0.0759329	11	5	A2A432;A2A432-2;E9PXY1
Hematological and neurological expressed 1-like protein	Hn1l	1.10847	1.29562	0.855552	-0.225073	0.0759609	7	7	Q3TM10;Q6PGH2;Q6UY53
Protein PML	Pml	0.903318	0.740652	1.21963	0.286438	0.0760186	4	4	Q60953;Q60953-2;D3YXR5;D3Z3A6;F7BTZ2;D3Z2V0
Apoptosis-associated speck-like protein containing a CARD	Pycard	0.729151	0.572537	1.27354	0.348849	0.0773393	3	3	Q54AA2;Q9EPB4
Vinculin	Vcl	1.53293	1.42897	1.07275	0.101316	0.0773713	25	25	Q64727;E9Q9D0
6-phosphofructo-2-kinase/fructose-2,6-bisphosphatase 2;6-phosphofructo-2-kinase;Fructose-2,6-bisphosphatase	Pfkfb2	2.97263	3.77053	0.788385	-0.343027	0.0778502	15	15	P70265;Q6GTL7;B2Z893;B2Z892;B2Z894;B2Z895;A7UAK5;A7UAK8;A2AUP4;A2AUP5;Q7TS91;A2AUP1;A2AUP3;P70266;Q6DTY7;A7UAK4;Q6DTY7-5;A2AFM9;P70266-2;C9VZF2;Q6DTY7-6;Q6DTY7-2
GTP-binding nuclear protein Ran	Ran;1700009N14Rik	0.537392	0.496807	1.08169	0.113289	0.0780926	13	13	P62827;Q14AA6;A6H622;Q61820
Gamma-interferon-inducible lysosomal thiol reductase	Ifi30	0.339719	0.38021	0.893504	-0.162455	0.0781394	2	2	F6YSI1;G3X911;Q9ESY9
Deoxyguanosine kinase, mitochondrial	Dguok	2.19207	2.89604	0.75692	-0.401788	0.0783231	4	4	Q8CBU2;Q9QX60;Q9QX60-2;Q504N4
ATP synthase subunit f, mitochondrial	Atp5j2	1.7168	1.81664	0.945041	-0.0815506	0.0783718	4	4	P56135;F8WHP8
Serum paraoxonase/lactonase 3	Pon3	2.23858	2.01979	1.10832	0.148379	0.0786267	5	5	Q62087;H3BL07
Signal recognition particle 54 kDa protein	Srp54;Srp54c	1.2455	1.20446	1.03407	0.0483385	0.0787916	16	16	P14576;E9PXC0;E9PZR5;H7BX98;P14576-2
Transportin-3	Tnpo3	1.04167	0.922705	1.12893	0.174957	0.0790042	3	3	Q6P2B1-2;Q6P2B1;Q6P2B1-3;E9PWA5;E9Q0H8
Glucosidase 2 subunit beta	Prkcsh	0.830883	0.773286	1.07448	0.103643	0.0792191	15	15	O08795-2;O08795;Q3U518
Galectin-3-binding protein	Lgals3bp	3.73236	4.98378	0.748901	-0.417152	0.0792447	14	12	Q07797;E9Q5X5
Cationic amino acid transporter 3	Slc7a3	0.561319	0.202298	2.77471	1.47234	0.0792921	5	5	P70423
GA-binding protein alpha chain	Gabpa	0.615947	0.557955	1.10394	0.142657	0.0794603	4	4	Q00422;E9Q6K9
Sphingomyelin phosphodiesterase 2	Smpd2	2.40896	2.99786	0.80356	-0.315523	0.0803267	2	2	O70572;D6RGM4
Arf-GAP with GTPase, ANK repeat and PH domain-containing protein 1	Agap1;Agap3	1.00576	0.826836	1.2164	0.282613	0.0807737	4	2	Q8BXK8;E9Q3K3;E9QKY0;Q8VHH5-2
Dihydropyrimidinase-related protein 1	Crmp1	1.08875	0.858148	1.26872	0.343374	0.0809003	12	9	Q6P1J1;P97427;E9Q756
Cytoplasmic dynein 1 light intermediate chain 1	Dync1li1	0.913277	0.985556	0.926662	-0.109885	0.0809506	18	17	Q3TWG5;Q8R1Q8;F6XF11
CCR4-NOT transcription complex subunit 1	Cnot1	0.910972	0.841891	1.08205	0.113773	0.0811148	18	18	Q6ZQ08-4;Q6ZQ08;Q6ZQ08-2;B7ZWL1;Q6ZQ08-3
Tyrosine-protein phosphatase non-receptor type 11	Ptpn11	1.20308	1.33711	0.899761	-0.152386	0.0811521	14	14	P35235;P35235-2
Ubiquitin domain-containing protein UBFD1	Ubfd1	0.747214	0.939966	0.794937	-0.331087	0.0812868	4	4	Q78JW9;E9QB07
Nucleobindin-2	Nucb2	2.26972	2.07156	1.09566	0.131797	0.0813186	24	24	P81117
Estradiol 17-beta-dehydrogenase 11	Hsd17b11	1.89522	1.78905	1.05934	0.0831716	0.0815586	5	3	A8Y5N3;Q9EQ06;A8Y5N2;Q9EQ06-2
F-actin-capping protein subunit alpha-2	Capza2	1.36004	1.23214	1.1038	0.142483	0.0820824	10	7	P47754;Q5DQJ3;D6RCW7
Microtubule-actin cross-linking factor 1	Macf1	1.80173	1.68864	1.06697	0.093521	0.082141	24	23	Q9QXZ0;B1ARU4;E9QA63;E9PVY7;Q9QXZ0-2;E9QNP1;Q9QXZ0-4;E9PVY6;Q9QXZ0-3;B1ART6;B1ARV9;F7ACR9;B1ARU5;F6Q750;B1ARU1;B1ARU6;F6SHS0;B1ARU2;B1ARW0;F6XCT0;E9PVY8;B1ARU0;F7AB76;B1ART9;F6YKN8;F6RCJ3;Q9CYG3
Parafibromin	Cdc73	0.710642	0.654559	1.08568	0.1186	0.0822205	3	3	Q8JZM7
Neuroendocrine convertase 2	Pcsk2	2.47381	2.72618	0.907427	-0.140146	0.082319	18	18	P21661;Q547J8
Histone H1.2	Hist1h1c	0.734447	0.682748	1.07572	0.105305	0.0825487	12	4	P15864;Q5SZA3
Splicing factor 3A subunit 1	Sf3a1	0.697813	0.618871	1.12756	0.173202	0.0826361	14	14	Q8K4Z5
Mitotic checkpoint protein BUB3	Bub3	0.832889	0.699031	1.19149	0.252768	0.0826761	10	10	Q9WVA3
Carboxypeptidase Q	Cpq	4.51982	5.38051	0.840036	-0.251478	0.0827732	7	7	Q9WVJ3;Q9WVJ3-2
Centrin-2;Centrin-1	Cetn2;Cetn1	1.28278	1.36043	0.942922	-0.084789	0.082943	4	4	Q9R1K9;B1AUQ7;P41209
Protein PRRC1	Prrc1	1.76733	1.9487	0.906928	-0.140941	0.0829602	5	5	Q3UPH1
60S ribosomal protein L22	Rpl22	0.873208	0.770134	1.13384	0.181216	0.0835026	2	2	P67984;Q4VAG4
[Pyruvate dehydrogenase [lipoamide]] kinase isozyme 3, mitochondrial	Pdk3	1.40577	2.01461	0.697788	-0.51914	0.0837414	4	4	Q4FJR4;Q922H2;E9QAW7
Alpha-2-macroglobulin receptor-associated protein	Lrpap1	1.3737	1.24774	1.10095	0.13875	0.084095	10	10	F6SY09;P55302;Q52KI7;F6WMD1
Transmembrane emp24 domain-containing protein 9	Tmed9	2.6729	2.40906	1.10952	0.149936	0.084157	10	9	E9PWI2;Q6PDC2;Q99KF1;Q8BLM5
AP-3 complex subunit mu-1	Ap3m1	0.93715	0.877	1.06859	0.0957031	0.0841918	8	8	Q9JKC8;H7BWY2;Q8R2R9;D3YXV9;D3YWU3;D6RI63
Phospholipase D3	Pld3	1.12821	1.02058	1.10546	0.144646	0.0842035	3	3	O35405
Cytochrome c oxidase subunit 7A2, mitochondrial	Cox7a2	0.880108	1.06597	0.82564	-0.276414	0.0842733	2	2	P48771
Leucine-rich repeat-containing protein 47	Lrrc47	1.26985	1.18151	1.07477	0.104026	0.0842888	13	13	E9PV22;B1AX98;Q505F5;F6Z4L9;F6YT33
40S ribosomal protein S19	Rps19-ps4;Rps19;Rps19-ps1	0.948297	0.892107	1.06299	0.0881222	0.0856485	9	9	F8VQH5;Q9CZX8;D3Z722;D3Z5R8;F6Q5Z8;D3YUG3;D3YUT3;F8VQL3
N-alpha-acetyltransferase 15, NatA auxiliary subunit	Naa15	0.686995	0.629622	1.09112	0.125814	0.0858341	15	14	G3X8Y3;Q80UM3
Vacuolar protein sorting-associated protein 26A	Vps26a	0.773249	0.671313	1.15185	0.203947	0.0860835	6	6	P40336-2;P40336;Q6PE78
Probable ubiquitin carboxyl-terminal hydrolase FAF-X;Ubiquitin carboxyl-terminal hydrolase	Usp9x	1.15549	1.04279	1.10808	0.148056	0.0864391	30	22	P70398;Q4FE56;E9PWA9;G3UY52;G3UZS3
Exocyst complex component 1	Exoc1	1.2341	1.39792	0.882812	-0.179822	0.0864769	5	5	Q6P1Y9;Q8R3S6;Q5PPR2
UDP-N-acetylglucosamine--peptide N-acetylglucosaminyltransferase 110 kDa subunit	Ogt	0.790743	0.857948	0.921668	-0.117681	0.0869161	9	9	Q8CGY8;Q8CGY8-2
Constitutive coactivator of PPAR-gamma-like protein 2	Fam120c	1.54162	1.18488	1.30108	0.379706	0.0870984	6	6	Q8C3F2;Q8C3F2-3;Q8C3F2-2
Sorting nexin-5	Snx5	0.887077	0.979539	0.905607	-0.143044	0.0871325	13	13	A2ANA4;Q9D8U8
T-complex protein 1 subunit theta	Cct8	0.764562	0.810851	0.942913	-0.0848033	0.0875629	32	32	P42932;Q3UL22;H3BL49;H3BJB6;H3BKG2;H3BLL1;H3BKR8
NADH dehydrogenase [ubiquinone] 1 subunit C2	Ndufc2	2.04596	2.15388	0.949895	-0.0741599	0.0876839	7	7	Q9CQ54
Macrophage migration inhibitory factor	Mif	0.902435	0.658336	1.37078	0.454999	0.0877142	3	3	P34884;Q545F0
	Srsf6	0.851959	0.769517	1.10713	0.146831	0.0877465	10	6	Q3TWW8
Hyaluronan and proteoglycan link protein 4	Hapln4	1.57447	1.30114	1.21007	0.27509	0.0884097	9	9	Q80WM4
Proliferation-associated protein 2G4	Pa2g4	0.707558	0.650145	1.08831	0.122087	0.0884851	18	18	P50580;Q3TGU7;D3YVH7
Low affinity cationic amino acid transporter 2	Slc7a2	2.08039	1.54446	1.347	0.429752	0.0886237	5	4	E9Q6C4;P18581-2;E9QJY0;E9QPL9;P18581
Lysophospholipid acyltransferase 2	Mboat2	1.27175	1.5737	0.808127	-0.307345	0.0889324	2	2	Q8R3I2;Q8R3I2-2;H7BWX8;Q8R3I2-3
Guanine nucleotide-binding protein subunit alpha-11	Gna11	1.11682	1.07094	1.04284	0.060519	0.0890656	11	7	P21278;Q3UPA1;P27600;Q2NKI3
Neuroendocrine protein 7B2;N-terminal peptide;C-terminal peptide	Scg5	2.29292	2.61034	0.878399	-0.187052	0.0890738	6	6	P12961;Q3TT51
Probable phospholipid-transporting ATPase IIA	Atp9a	2.369	2.69679	0.878452	-0.186965	0.0891292	7	5	A2AQC3;O70228;Q8C288;Q8C4G3
Glucose-6-phosphate isomerase	Gpi;Gm1840	1.01061	0.965654	1.04655	0.0656481	0.0896892	17	17	P06745;F6SAC3;CON__Q3ZBD7
NADH dehydrogenase [ubiquinone] iron-sulfur protein 2, mitochondrial	Ndufs2	1.48627	1.59289	0.933065	-0.0999504	0.0897553	14	14	Q91WD5;D3YXT0;F6RJ83
Solute carrier family 35 member E1	Slc35e1	0.941028	1.20422	0.781442	-0.355789	0.0897553	2	2	Q8CD26
Brain protein 44-like protein	Brp44l;Gm3452	1.08074	1.17617	0.918864	-0.122077	0.0899684	3	3	E9Q0V4;E9PXT1;P63030;Q3UX28;D3Z5S0;D3YWY6;D3Z786
Selenoprotein M	Selm	6.05128	3.59359	1.68391	0.751815	0.0900554	3	3	Q8VHC3
Ufm1-specific protease 2	Ufsp2	1.2698	1.03103	1.23158	0.300515	0.0900741	5	5	Q99K23
Signal peptidase complex subunit 2	Spcs2	1.80642	1.9625	0.920469	-0.119559	0.0905086	14	14	Q9CYN2
Guanine nucleotide-binding protein G(I)/G(S)/G(T) subunit beta-1	Gnb1	1.24746	1.15217	1.0827	0.11464	0.0910563	12	7	P62874;Q3TQ70;H3BKR2;H3BLF7;Q54AE3;Q61011
Fatty acid desaturase 2	Fads2	0.245413	0.202927	1.20937	0.274251	0.0912179	6	6	Q9Z0R9
Transmembrane 9 superfamily member 3	Tm9sf3	1.70853	1.47773	1.15619	0.209373	0.092151	8	8	Q9ET30;Q3UH23;Q8C6F5
Exportin-5	Xpo5	0.812381	0.749191	1.08434	0.116823	0.0922189	15	15	Q924C1;Q924C1-2;Q924C1-3
ATP-dependent RNA helicase DDX1	Ddx1	0.972713	0.92216	1.05482	0.0769971	0.0924251	20	20	Q91VR5
Leukotriene A-4 hydrolase	Lta4h	1.66133	1.60424	1.03559	0.0504487	0.0924379	18	18	P24527
Syntaxin-binding protein 1	Stxbp1	0.813745	1.02157	0.796563	-0.328139	0.0924507	19	19	O08599;O08599-2
Heterogeneous nuclear ribonucleoproteins C1/C2	Hnrnpc	0.832212	0.775225	1.07351	0.102336	0.0928924	13	13	Q3U6P5;Q9Z204;Q9Z204-2;Q9Z204-5;Q9Z204-3;Q9Z204-4
Phosphorylase;Glycogen phosphorylase, brain form	Pygb	0.583837	0.660852	0.883461	-0.178762	0.0931966	20	14	A2AWQ5;Q8CI94
Ras-related protein Rab-1B	Rab1b	1.26509	1.39056	0.90977	-0.136426	0.0932095	8	4	Q0PD66;Q9D1G1
Exocyst complex component 8	Exoc8	1.48246	1.61318	0.918968	-0.121914	0.0939074	2	2	Q6PGF7
CLIP-associating protein 1	Clasp1	0.819013	0.911617	0.898418	-0.154541	0.0942085	7	3	E9QKH0;Q80TV8;E9QNY9;Q80TV8-2;E9Q6L0
GTP-binding protein SAR1a	Sar1a	1.43491	1.37857	1.04087	0.0577877	0.0942996	8	6	Q99JZ4;P36536
Calcium-dependent secretion activator 1	Cadps	2.9064	3.24028	0.89696	-0.156885	0.0944561	31	31	Q80TJ1-2;Q80TJ1;Q80TJ1-4;A4PI81;E9Q835;Q8BYR5-2;E9PVF7;E9Q5C0;Q8BYR5;Q8BYR5-3;Q8BYR5-4;Q8BYR5-5;H7BXB2;E9Q9P3;E9Q2A3;F6SH36;Q8BYR5-6;A4PI80
Mitochondrial-processing peptidase subunit alpha	Pmpca	1.10781	1.36399	0.812183	-0.300123	0.094724	9	9	A2AIW8;Q9DC61;A2AIW9
Zinc finger protein ubi-d4	Dpf2	0.580532	0.715056	0.811869	-0.300681	0.0948375	3	3	D3Z5N6;Q61103;F8WIP7
Non-specific lipid-transfer protein	Scp2	0.839718	0.791092	1.06147	0.0860594	0.0949686	7	7	P32020;P32020-2
	Hnrnpr	0.812353	0.777812	1.04441	0.0626853	0.0951744	17	12	Q8VHM5;A2AW41;A2AW40;G3UXU5
HCLS1-associated protein X-1	Hax1	1.4984	1.28406	1.16692	0.22271	0.0956753	2	2	B9EJR4;O35387;G3X9M8
Core histone macro-H2A.1	H2afy	2.95311	2.74477	1.0759	0.10555	0.0957062	12	10	Q9QZQ8;Q9QZQ8-2
Cytochrome c oxidase subunit 4 isoform 1, mitochondrial	Cox4i1	0.999787	1.06161	0.941765	-0.0865612	0.0960041	12	12	A2RSV8;P19783;D6RG40
Non-POU domain-containing octamer-binding protein	Nono	0.758928	0.685562	1.10702	0.146676	0.0961258	17	16	F6XLC7;Q4FK11;Q99K48;Q99K48-2;B1AXT0
T-complex protein 1 subunit epsilon	Cct5	0.777429	0.811332	0.958213	-0.0615815	0.0965028	24	24	P80316;E0CZA1
Synaptic vesicle membrane protein VAT-1 homolog-like	Vat1l	0.53573	0.570503	0.939049	-0.0907284	0.0970801	16	16	Q80TB8;D3Z434
Ras-related protein Rab-37	Rab37	2.54549	2.98385	0.853089	-0.229232	0.097499	6	6	Q544E8;Q9JKM7;Q8BQX0
Hepatocyte growth factor-regulated tyrosine kinase substrate	Hgs	1.2026	1.05896	1.13564	0.183509	0.0975035	6	6	Q3UMA3;Q99LI8;E9PYT7;B1ATZ1;B1ATZ0;F6VV02;B1ATY9
Proteasome subunit alpha type;Proteasome subunit alpha type-5	Gm8394;Psma5	0.972608	1.02561	0.948321	-0.0765519	0.0976248	6	6	D3YX79;Q3UPK6;Q9Z2U1
V-type proton ATPase subunit C 1	Atp6v1c1	0.843154	0.882982	0.954894	-0.0665879	0.0976427	18	18	Q9Z1G3;Q99L60-2;Q99L60;Q99L60-3;D3Z5W3
Glucagon;Glicentin;Glicentin-related polypeptide;Oxyntomodulin;Glucagon;Glucagon-like peptide 1;Glucagon-like peptide 1(7-37);Glucagon-like peptide 1(7-36);Glucagon-like peptide 2	Gcg	24.6528	21.326	1.156	0.209138	0.0979558	14	14	A2AS85;P55095;A2AS86
RNA-binding protein 8A	Rbm8a	1.17195	0.896028	1.30794	0.387295	0.0982223	3	3	Q9CWZ3;Q9CWZ3-2
THO complex subunit 1	Thoc1	0.690053	0.829039	0.832353	-0.264733	0.098853	4	4	Q8R3N6
Ubiquitin carboxyl-terminal hydrolase isozyme L5	Uchl5	1.12359	0.971673	1.15635	0.209573	0.0996346	7	7	Q9WUP7;Q9WUP7-2
Ubiquitin carboxyl-terminal hydrolase 4;Ubiquitin carboxyl-terminal hydrolase	Usp4	1.04513	0.900596	1.16049	0.21473	0.0996414	3	3	P35123;G3X9H2
Erlin-1	Erlin1	0.439629	0.592844	0.741559	-0.431366	0.100232	6	4	Q91X78
NADH dehydrogenase [ubiquinone] 1 beta subcomplex subunit 10	Ndufb10	2.684	1.70543	1.5738	0.654249	0.100325	9	9	Q9DCS9;D3YUK4
U6 snRNA-associated Sm-like protein LSm4	Lsm4	1.12616	1.03804	1.08489	0.11755	0.100436	3	3	Q9CY46;Q9QXA5;D3YTP8
Testican-1	Spock1	13.8591	12.2527	1.13111	0.177734	0.100466	6	5	Q62288;Q8BKQ3;F8WJD8;D3Z425;Q8BKV0-2
RNA-binding motif protein, X chromosome;RNA-binding motif protein, X chromosome, N-terminally processed	Rbmx	1.15157	1.02536	1.12309	0.167472	0.100874	14	2	Q9WV02;A2AFI3;Q9WV02-2;A2AFI4
Large proline-rich protein BAG6	Bag6	0.705464	0.740121	0.953174	-0.0691887	0.101135	9	9	Q9Z1R2;Q3UF95;G3UZT6;Q3TDL4;G3UYQ2;G3UXT8;G3V013;G3UYZ0
40S ribosomal protein S15a	Rps15a;Rps15a-ps1	0.8653	0.815166	1.0615	0.0861065	0.101772	8	8	P62245;Q5M9M4;F8WJ41;D3YXU0;D3YVB4;D3Z712;D3Z7W9
Destrin	Dstn	0.855514	0.939834	0.910282	-0.135614	0.101838	6	5	Q4FK36;Q9R0P5
Ubiquitin carboxyl-terminal hydrolase;Ubiquitin carboxyl-terminal hydrolase 34	Usp34	0.537242	0.57511	0.934155	-0.0982658	0.102142	4	4	F6WJB7;Q6ZQ93;Q6ZQ93-2;Q6ZQ93-3;F6SZG2;F7BSN3;Q6ZQ93-4
Cytochrome b5 type B	Cyb5b	1.78569	2.14534	0.832358	-0.264725	0.102329	6	6	Q9CQX2
Receptor expression-enhancing protein 5	Reep5	0.807442	0.730179	1.10581	0.145108	0.102524	6	6	G3X8R0;Q60870
Mitochondrial import receptor subunit TOM70	Tomm70a	0.848166	0.811995	1.04455	0.0628758	0.102554	13	13	Q80TT4;Q9CZW5
Spermatid perinuclear RNA-binding protein	Strbp	0.854449	0.783235	1.09092	0.125549	0.102701	6	3	A2BH81;Q91WM1;Q91WM1-2
Eukaryotic translation initiation factor 3 subunit G	Eif3g	1.24699	1.12102	1.11237	0.153638	0.102818	6	6	Q544H0;Q9Z1D1
Histone H2B;Histone H2B type 1-F/J/L;Histone H2B type 1-H;Histone H2B type 1-C/E/G;Histone H2B type 1-K;Histone H2B type 1-M;Histone H2B type 1-B;Histone H2B type 2-B;Histone H2B type 1-P	Gm13646;Hist1h2bk;Hist1h2bf;Hist1h2bh;Hist1h2bc;Hist1h2bm;Hist1h2bb;Hist2h2bb;Hist1h2bp	0.763257	0.714615	1.06807	0.0950027	0.102963	7	4	Q921L4;Q8CBB6;B2RVD5;P10853;Q64478;Q6ZWY9;Q8CGP1;Q8CGP2-2;B2RTK3;P10854;Q64475;Q64525;Q8CGP2;G3X9D5;P70696
Testican-2	Spock2	3.23284	3.9949	0.809242	-0.305357	0.103487	10	10	Q9ER58;Q6PAN0
Cytochrome c oxidase subunit 5A, mitochondrial	Cox5a	1.02995	1.09439	0.941118	-0.0875527	0.103501	5	5	P12787
Peroxisomal acyl-coenzyme A oxidase 1;Acyl-coenzyme A oxidase	Acox1	1.38449	0.778295	1.77888	0.830966	0.103722	5	5	Q9R0H0;Q9R0H0-2;A2A848
Mitochondrial import receptor subunit TOM40 homolog	Tomm40	0.94383	1.02061	0.92477	-0.112833	0.103914	5	5	Q9QYA2;G3UY77
Sideroflexin-2	Sfxn2	5.56713	3.04717	1.82698	0.869464	0.104041	5	5	Q3UC14;Q925N2
Dehydrogenase/reductase SDR family member 7	Dhrs7	1.43626	1.24846	1.15043	0.202167	0.104792	4	4	Q9CXR1
26S proteasome non-ATPase regulatory subunit 5	Psmd5	0.824552	0.871753	0.945855	-0.0803089	0.105022	10	10	Q8BJY1;F7BA91
26S proteasome non-ATPase regulatory subunit 14	Psmd14	1.01406	0.93031	1.09002	0.12436	0.106562	5	5	A2AR77;O35593;F6SAH4
ADP-ribosylation factor GTPase-activating protein 2	Arfgap2	1.09835	1.04961	1.04644	0.0654845	0.106946	11	11	Q99K28-2;Q99K28
Lon protease homolog 2, peroxisomal	Lonp2	0.83832	0.719965	1.16439	0.219574	0.107062	2	2	Q9DBN5;Q9DBN5-2
Putative RNA-binding protein Luc7-like 2	Luc7l2	0.832107	0.751506	1.10725	0.146984	0.107341	10	6	Q7TNC4;Q7TNC4-3;E9PZ93;Q7TNC4-2;E9QNA0;Q05CX5;E9PXU4;E9PX54;E9Q715;Q9CYI4-2;D3Z765;D3YZ82
Protein kinase C and casein kinase substrate in neurons protein 1	Pacsin1	0.494446	0.750993	0.65839	-0.602986	0.107655	7	7	Q543Y7;Q61644
Heterogeneous nuclear ribonucleoprotein A1	Hnrnpa1	0.862094	0.807937	1.06703	0.0936024	0.10786	15	15	Q5EBP8;P49312;P49312-2
40S ribosomal protein S15	Rps15	1.91355	1.78117	1.07432	0.103426	0.107947	2	2	P62843;Q3UXS6;D3YTQ9
ATP synthase subunit d, mitochondrial	Atp5h;Gm10250	1.6662	1.87918	0.886663	-0.173542	0.10801	10	10	Q9DCX2;G3X9L6;B1ASE2
DNA mismatch repair protein Msh6	Msh6	0.204432	0.284406	0.718803	-0.476331	0.109061	8	8	P54276
Coiled-coil-helix-coiled-coil-helix domain-containing protein 3, mitochondrial	Chchd3	1.32746	1.44912	0.916046	-0.126509	0.109305	11	2	Q9CRB9;E9Q4H4;E9Q1D3;F6QFL0
Glutathione S-transferase theta-2	Gstt2	2.37559	2.97482	0.798566	-0.324517	0.109376	3	3	Q61133;Q91VB0
Transformer-2 protein homolog beta	Tra2b	0.83066	0.782166	1.062	0.0867833	0.109975	7	7	P62996;F8WJG3
N-acetylglucosamine-1-phosphotransferase subunit gamma	Gnptg	0.468473	0.566654	0.826736	-0.274502	0.110128	9	9	E9Q9H7;Q6S5C2-2;Q6S5C2
Dystonin	Dst	0.956708	0.84505	1.13213	0.179042	0.11115	30	20	E9PXE5;H7BX73;Q91ZU6-4;Q91ZU6;E9Q9X1;Q91ZU6-3;E9QL23;Q91ZU6-2;E9PXR0;Q91ZU6-6;E9Q9X2;Q91ZU6-8
Sorting nexin-27	Snx27	1.0577	1.1545	0.916154	-0.126338	0.111236	4	4	Q3UHD6;Q3UHD6-2;E9PW30;F6QKA8
Tyrosine-protein kinase BAZ1B	Baz1b	0.581971	0.527398	1.10348	0.142055	0.111522	12	12	Q9Z277;Q9Z277-2
Uncharacterized protein FLJ45252 homolog		1.30334	1.05262	1.23819	0.308229	0.111692	4	4	Q6PIU9
Microtubule-associated protein;Microtubule-associated protein tau	Mapt	0.854577	0.626194	1.36472	0.448601	0.111734	6	6	A2A5Y6;P10637;B1AQW3;P10637-2;B1AQW2;P10637-5;Q547J4;P10637-6;P10637-3;P10637-4
Casein kinase II subunit alpha	Csnk2a1	0.724455	0.682326	1.06174	0.0864349	0.112423	11	11	Q60737;A2ANR6;Q6NSS6
Neudesin	Nenf	0.899454	0.963418	0.933607	-0.0991124	0.112762	4	4	Q9CQ45
Ezrin	Ezr	0.904345	1.01991	0.886691	-0.173497	0.113252	16	7	P26040;Q4KML7
Voltage-dependent calcium channel subunit alpha-2/delta-1;Voltage-dependent calcium channel subunit alpha-2-1;Voltage-dependent calcium channel subunit delta-1	Cacna2d1	1.49318	1.98105	0.753732	-0.407877	0.113314	8	8	O08532;O08532-5;O08532-4;Q14BH8;O08532-2;O08532-3;E9Q1X8
Dynamin-1-like protein	Dnm1l	1.06784	1.16022	0.920377	-0.119703	0.113475	16	16	E9PUD2;Q8K1M6-3;Q8K1M6;Q8K1M6-2;Q8K1M6-4;Q8K1M6-5
60 kDa heat shock protein, mitochondrial	Hspd1	1.41934	1.49872	0.947035	-0.0785106	0.1139	29	29	P63038;P63038-2;D3Z2F2;D3Z7J9
Poly(A) polymerase alpha	Papola	0.827884	0.713626	1.16011	0.21426	0.113975	3	3	F8WHQ6;Q61183;E9QAN2;E9PZR3;E9PWC8;Q61183-3;Q61183-4;F6VTN8;Q61183-2;F7CXD5;A1L349;Q9WVP6
Translationally-controlled tumor protein	Tpt1	0.517776	0.474854	1.09039	0.124844	0.114126	8	8	P63028;D3YU75
	Rap1gap	1.16794	1.35864	0.859639	-0.218197	0.114134	3	2	A2ALS4;E9PZZ8;F7D8S2;A2ALS5;A2ALS7
COP9 signalosome complex subunit 3	Cops3	1.07897	1.00917	1.06917	0.0964855	0.114145	7	7	O88543;Q3UQL2;Q8BX58;F6YCA7;D3Z036
Collagen alpha-1(I) chain	Col1a1	2.31245	4.75526	0.486293	-1.0401	0.114404	4	4	P11087;F8WGB7;P11087-2
Inositol polyphosphate 1-phosphatase	Inpp1	1.18468	1.31392	0.901638	-0.14938	0.114711	4	4	P49442
Peptidyl-tRNA hydrolase 2, mitochondrial	Ptrh2	0.675274	0.518723	1.3018	0.380509	0.114723	4	4	Q5SXR0;Q8R2Y8
Symplekin	Sympk	0.91304	0.747881	1.22084	0.287869	0.115095	4	4	F8WJD4;E9PVR1;Q80X82;E9Q661;D3Z2M2;E9Q937
Dihydrolipoyllysine-residue acetyltransferase component of pyruvate dehydrogenase complex, mitochondrial	Dlat	1.78842	1.9194	0.93176	-0.10197	0.115267	13	13	Q8BMF4
Mitochondrial fission 1 protein	Fis1	1.67834	1.94812	0.861518	-0.215048	0.115328	5	5	Q9CQ92;G3X9U9;D3YZ32
Peflin	Pef1	1.41888	1.23253	1.15119	0.20313	0.115437	3	3	A3KFW0;Q8BFY6
BRISC complex subunit Abro1	Fam175b	1.56403	1.32593	1.17957	0.238264	0.115565	6	6	Q3TCJ1;G3X9P0;D3Z4D8
Dolichyl-diphosphooligosaccharide--protein glycosyltransferase subunit DAD1	Dad1	1.3392	1.42544	0.939499	-0.0900359	0.115891	4	4	B8JJY6;P61804
Vesicle-associated membrane protein 4	Vamp4	1.27574	1.04464	1.22122	0.288328	0.116333	4	4	O70480;Q8BSN6
Leucine-rich repeat-containing protein 57	Lrrc57	1.40499	1.77066	0.793484	-0.333727	0.116878	3	3	F6U0Y0;Q8JZX5;Q9D1G5;A2AKH7;B0R031
DnaJ homolog subfamily A member 2	Dnaja2	1.06004	0.909501	1.16552	0.220972	0.1171	7	7	Q9QYJ0
Insulin-2;Insulin-2 B chain;Insulin-2 A chain	Ins2	3.01453	3.48094	0.86601	-0.207544	0.11739	3	3	P01326;Q5EEX1;D3Z595;E0CXX7;D3Z596;D3YWU5
Transformer-2 protein homolog alpha	Tra2a	0.787417	0.662688	1.18822	0.248798	0.117568	3	3	E9QP00;Q6PFR5;Q3TAP5
Heat shock 70 kDa protein 4L	Hspa4l	0.785266	0.833364	0.942285	-0.0857653	0.117658	24	21	P48722;P48722-2;E0CY23;F6SMW7;F6TFH3
WD repeat-containing protein 5	Wdr5	0.627797	0.571856	1.09782	0.134646	0.117794	5	5	A2AKB1;P61965;F6Q3W0
28 kDa heat- and acid-stable phosphoprotein	Pdap1	0.92759	0.863491	1.07423	0.103306	0.117882	6	6	B2RTB0;Q3UHX2
Transmembrane protein 43	Tmem43	1.03216	1.19228	0.865703	-0.208056	0.118976	5	5	Q9DBS1
Sideroflexin-3	Sfxn3	3.07361	4.04298	0.760234	-0.395485	0.119878	7	7	Q91V61;Q91V61-2;Q3U4F0
Ubiquitin-like modifier-activating enzyme 1	Uba1	0.670397	0.637607	1.05143	0.0723482	0.12015	30	30	B9EHN0;Q02053;P31254
PRA1 family protein 3	Arl6ip5	1.54296	1.61066	0.957968	-0.0619513	0.12047	3	3	Q8R5J9
Pancreas/duodenum homeobox protein 1	Pdx1	0.527235	0.460946	1.14381	0.193848	0.120551	4	4	P52946
Ganglioside-induced differentiation-associated protein 1	Gdap1	1.21626	1.37106	0.887095	-0.17284	0.120582	8	8	O88741;O88741-2
Histone acetyltransferase type B catalytic subunit	Hat1	0.510829	0.321252	1.59012	0.669135	0.120651	5	5	A2ATU9;Q8BY71
39S ribosomal protein L28, mitochondrial	Mrpl28	1.179	1.02147	1.15422	0.206917	0.120853	2	2	Q9D1B9
Mannosyl-oligosaccharide 1,2-alpha-mannosidase IA	Man1a1;Man1a	1.10114	1.89644	0.580635	-0.784296	0.121065	9	9	P45700;Q544T7;D3Z799
Nuclear pore complex protein Nup107	Nup107	0.574984	0.474608	1.21149	0.276785	0.121466	8	8	Q8BH74;E9Q4V9
Pterin-4-alpha-carbinolamine dehydratase 2	Pcbd2	1.38751	1.92554	0.720582	-0.472765	0.121483	3	3	Q9CZL5
Structural maintenance of chromosomes protein;Structural maintenance of chromosomes protein 2	Smc2	0.29144	0.206529	1.41113	0.496855	0.12188	20	20	E9Q1E9;Q8CG48;B1AWH6
Heterogeneous nuclear ribonucleoprotein F;Heterogeneous nuclear ribonucleoprotein F, N-terminally processed	Hnrnpf	0.673688	0.633823	1.0629	0.0880006	0.122138	11	9	Q9Z2X1;Q9Z2X1-2
ADP-ribosylation factor 3;ADP-ribosylation factor 1	Arf3;Arf1	1.37964	1.31365	1.05023	0.0707109	0.122965	11	2	P61205;Q3U344;P84078;D3YV25
Acylamino-acid-releasing enzyme	Apeh	1.51657	1.63372	0.928292	-0.107349	0.123266	11	11	G3X9I2;Q8R146;Q8R146-2
	Zfp207	1.04186	0.913848	1.14008	0.189135	0.123761	6	6	Q9JMD0;E9PW12;Q99LA2;Q8CCB2;B1AQG7
Proteasome assembly chaperone 1	Psmg1	0.751612	0.707279	1.06268	0.0877087	0.123772	4	4	Q9JK23;D3Z795;D6RG59
Calcium-binding mitochondrial carrier protein Aralar2	Slc25a13	2.28504	2.39166	0.95542	-0.0657929	0.124114	8	5	F6ZSC6;Q9QXX4
Serine/threonine-protein kinase N1	Pkn1	1.28317	1.20539	1.06453	0.0902123	0.124578	3	3	P70268-2;P70268;D6RH37
V-type proton ATPase subunit S1	Atp6ap1	0.706758	0.835008	0.846409	-0.240574	0.124592	8	8	Q3TWN7;Q9R1Q9;Q3TKX1;B7FAU3;B7FAU7;F6X9J0;F6ZE56
ATPase WRNIP1	Wrnip1	0.453826	0.425776	1.06588	0.0920446	0.125033	7	7	Q91XU0;Q91XU0-2
Trans-1,2-dihydrobenzene-1,2-diol dehydrogenase	Dhdh	12.8443	10.6694	1.20384	0.267649	0.125368	3	3	F6Z0K0;Q9DBB8
NADH dehydrogenase [ubiquinone] 1 beta subcomplex subunit 7	Ndufb7	1.36852	1.4759	0.927244	-0.108978	0.126232	5	5	Q9CR61
Eukaryotic translation initiation factor 3 subunit L	Eif3l	1.08788	1.06593	1.02059	0.0294067	0.126311	19	19	Q8QZY1
Prefoldin subunit 1	Pfdn1	1.17808	0.972139	1.21184	0.277203	0.126388	3	3	Q9CQF7;Q9CWM4
Beta-2-microglobulin	B2m	1.85836	1.56523	1.18728	0.247655	0.126642	3	3	P01887;Q91XJ8
Sec1 family domain-containing protein 1	Scfd1	1.37482	1.24961	1.1002	0.137765	0.12695	15	15	Q8BRF7;Q8BRF7-3;Q8BRF7-2;F6X5M4
Mitochondrial import receptor subunit TOM34	Tomm34	1.29197	1.20504	1.07214	0.100492	0.127026	9	9	Q9CYG7;Q9CYG7-2
Thymidylate kinase	Dtymk	0.360336	0.598694	0.60187	-0.732476	0.127108	6	6	P97930;D3Z3R3;P97930-2;Q6GRA7
60S ribosomal protein L14	Rpl14	0.914868	0.85839	1.0658	0.0919303	0.127249	7	7	Q9CWK0;Q9CR57
Nuclear pore complex protein Nup160	Nup160	0.560139	0.516679	1.08411	0.116517	0.127276	8	8	A2AH38;Q9Z0W3;Q9Z0W3-2
Proline synthase co-transcribed bacterial homolog protein	Prosc	1.1325	1.25819	0.900103	-0.151839	0.127288	10	10	Q544R1;Q9Z2Y8;Q80ZV3
Sister chromatid cohesion protein PDS5 homolog A	Pds5a	0.632495	0.577475	1.09528	0.131296	0.127492	10	8	E9QPI5;Q6A026
Atlastin-2	Atl2	1.00803	1.21962	0.826512	-0.274893	0.12777	6	5	Q6PA06;E9QND8;Q6PA06-2;Q8BYP9
Nuclear pore complex protein Nup155	Nup155	0.55491	0.514998	1.0775	0.107687	0.128	11	11	Q6ZQ45;Q99P88
Protein RRP5 homolog	Pdcd11	0.803287	0.73726	1.08956	0.123742	0.128605	4	4	Q6NS46
Epidermal growth factor receptor substrate 15-like 1	Eps15l1	1.00207	1.10075	0.910352	-0.135504	0.12888	6	6	Q60902;F8WJ42;Q60902-2;Q60902-4;F6Q0T0;Q60902-3;F6ZE93
	Ddx23	0.789735	0.69556	1.13539	0.183194	0.129132	10	10	D3Z0M9
HIV Tat-specific factor 1 homolog	Htatsf1	0.458082	0.525579	0.871576	-0.198302	0.129212	5	5	B1AVC8;Q8BGC0;Q8BGC0-2
Serine/arginine-rich splicing factor 3	Srsf3;Gm12355	1.16724	0.982622	1.18788	0.248393	0.129361	4	3	B2KF41;P84104;P84104-2;Q3U781;A2A4X6
40S ribosomal protein S28	Rps28;Gm3511	1.00552	0.90066	1.11643	0.158887	0.130085	6	6	P62858;Q059I1;G3UYV7;D3YVD9
NADH dehydrogenase [ubiquinone] 1 alpha subcomplex subunit 12	Ndufa12	1.53659	1.59641	0.962528	-0.055099	0.130473	9	9	Q7TMF3
Mitogen-activated protein kinase 3	Mapk3	1.11392	1.31887	0.844602	-0.243657	0.130598	13	11	Q63844;D3Z3G6;D3Z6D8
Cell division control protein 42 homolog	Cdc42	1.46378	1.27302	1.14985	0.201444	0.130805	6	5	P60766;Q3UL78;P60766-1
Ubiquitin-like modifier-activating enzyme 5	Uba5	1.5633	1.6748	0.933425	-0.0993942	0.131343	6	6	Q8VE47;D6RH76;F6VRI6
Tubulin beta-5 chain	Tubb5	0.561916	0.517634	1.08555	0.118422	0.132005	22	4	P99024;G3UZR1
Probable aminopeptidase NPEPL1	Npepl1	2.05582	2.55276	0.805332	-0.312344	0.132317	5	5	Q6NSR8;F6T2H5
Protein S100-A6	S100a6	0.6842	0.873233	0.783525	-0.351949	0.133055	2	2	P14069;Q545I9
cAMP-dependent protein kinase type I-alpha regulatory subunit	Prkar1a	0.628608	0.653456	0.961974	-0.0559295	0.133061	19	14	Q3TYK4;A2AI68;Q9DBC7;E9Q276;A2AI69;D3Z4L4
2,4-dienoyl-CoA reductase, mitochondrial	Decr1	1.82675	2.2453	0.813588	-0.297629	0.133508	5	5	Q4FJK0;Q9CQ62
Phosphoacetylglucosamine mutase	Pgm3	2.28181	2.54676	0.895966	-0.158484	0.133528	13	13	Q9CYR6;Q8BWW3
Integrator complex subunit 11	Cpsf3l	1.01896	0.855838	1.1906	0.251688	0.133571	3	3	A2ADA4;Q9CWS4;A8Y5J3;D6RH69
Pyridoxine-5-phosphate oxidase	Pnpo	3.4803	2.41428	1.44155	0.527619	0.133635	5	5	Q91XF0;A2A6E7
Mitochondrial import inner membrane translocase subunit TIM44	Timm44	0.914211	0.981011	0.931907	-0.101742	0.133817	8	8	O35857
14 kDa phosphohistidine phosphatase	Phpt1	1.38509	1.50334	0.921342	-0.118192	0.134466	4	4	A2AJA8;Q9DAK9
Ubiquilin-1	Ubqln1	1.25789	1.45152	0.866602	-0.206559	0.134725	9	6	Q8R317;Q8R317-2
ATP synthase subunit delta, mitochondrial	Atp5d	1.33747	1.39633	0.957847	-0.0621334	0.13516	2	2	Q4FK74;Q9D3D9
NADH dehydrogenase [ubiquinone] 1 alpha subcomplex subunit 13	Ndufa13	1.65514	1.71263	0.966432	-0.0492602	0.135274	7	7	Q9ERS2
ATP synthase subunit beta, mitochondrial	Atp5b	1.59109	1.69377	0.939378	-0.0902225	0.135824	22	22	P56480
CWF19-like protein 1	Cwf19l1	0.672084	0.526195	1.27725	0.353044	0.136119	4	4	Q8CI33;Q8CI33-2
High mobility group protein B1	Hmgb1;Hmg1l1	1.04207	0.956697	1.08924	0.123318	0.13612	13	11	P63158;Q58EV5;D3Z351;D3YZ18;D3YVC6;E9PYZ6
ATP-binding cassette sub-family D member 3	Abcd3	1.26819	1.37515	0.922219	-0.116818	0.136413	10	10	P55096
Prohibitin-2	Phb2	1.18928	1.24593	0.954532	-0.0671346	0.136719	12	12	O35129;Q3V235;F6QPR1;E9Q313;F6Q8V7
Regulator of microtubule dynamics protein 1	Fam82b	1.72411	2.53585	0.679894	-0.556618	0.136789	5	5	Q9DCV4;A2AGJ2
V-type proton ATPase subunit G 1	Atp6v1g1	0.813309	0.740096	1.09892	0.136091	0.137046	5	5	Q5HZY7;Q9CR51
NADH dehydrogenase [ubiquinone] 1 beta subcomplex subunit 6	Ndufb6	1.55286	1.60511	0.967448	-0.0477444	0.137342	3	3	A2AP31;Q3UIU2;A2AP32
Ataxin-2-like protein	Atxn2l	0.593196	0.50105	1.18391	0.243554	0.1375	6	6	Q7TQH0-2;Q7TQH0;Q7TQH0-3;Q3TGG2;E9Q5Q0
PEST proteolytic signal-containing nuclear protein	Pcnp	1.23976	0.991034	1.25098	0.323054	0.137752	4	4	Q3UCC5;Q6P8I4;F8WI88;Q3TM89;D3YWA4
Dolichyl-diphosphooligosaccharide--protein glycosyltransferase 48 kDa subunit	Ddost	1.34274	1.38435	0.969943	-0.0440288	0.138701	12	12	O54734
Myosin light chain kinase, smooth muscle;Myosin light chain kinase, smooth muscle, deglutamylated form	Mylk	1.05083	0.947277	1.10932	0.149671	0.13876	2	2	B1B1A8;Q6PDN3;Q6PDN3-3;Q6PDN3-2
Splicing factor 3B subunit 1	Sf3b1	0.861974	0.792275	1.08797	0.121643	0.139274	24	24	G5E866;Q99NB9
Splicing factor U2AF 35 kDa subunit;Splicing factor U2AF 26 kDa subunit	U2af1;U2af1l4	0.863063	0.756467	1.14091	0.190189	0.139871	4	4	Q14C24;Q9D883;G3UW94;Q8BGJ9;E9Q5J3;E9Q1I7;E9PXR5;E9PUZ3;E9Q5Y2;F8WH71;E9Q809;E9PWM2;E9PWX6
Dipeptidyl peptidase 2	Dpp7	2.34554	2.13629	1.09795	0.134813	0.140098	7	7	Q9ET22
Putative adenosylhomocysteinase 2	Ahcyl1	0.920758	0.988995	0.931004	-0.103141	0.140803	14	7	Q80SW1
NAD-dependent malic enzyme, mitochondrial	Me2	1.01873	0.782087	1.30258	0.381371	0.141745	8	8	Q99KE1
SUMO-conjugating enzyme UBC9	Ube2i	0.817558	0.745512	1.09664	0.13309	0.141788	6	6	P63280;G3UYP0;Q8CFZ0
Probable rRNA-processing protein EBP2	Ebna1bp2	0.772793	0.691792	1.11709	0.159744	0.141949	2	2	Q9D903;A2ACZ1
Heat shock protein 105 kDa	Hsph1	0.807724	0.877111	0.920891	-0.118897	0.142226	25	22	Q61699;Q61699-2;E9Q0U7;D3Z3I9;D3Z027
Tubulin beta-3 chain	Tubb3	0.748207	0.910738	0.821539	-0.283599	0.14228	17	2	Q9ERD7;CON__ENSEMBL:ENSBTAP00000025008;A2AQ07
REST corepressor 1	Rcor1	0.966267	0.82471	1.17164	0.228535	0.142414	4	2	Q8CFE3;E9QK09
Synaptic vesicle glycoprotein 2A	Sv2a	1.09589	1.26148	0.868734	-0.203014	0.142454	9	9	Q9JIS5
Zinc finger MYM-type protein 2	Zmym2	0.382318	0.346212	1.10429	0.143117	0.142457	2	2	Q9CU65
Integrin alpha-1	Itga1	0.772971	1.04807	0.737518	-0.439249	0.142617	5	5	F8VQN5;Q3V3R4;Q3URV2
Coronin-2B	Coro2b	0.708447	0.641669	1.10407	0.142831	0.142743	9	9	Q8BH44;G3UW48;G3UWZ2;G3V005;G3UYG8
NEDD8-activating enzyme E1 catalytic subunit	Uba3	1.10703	0.719935	1.53768	0.620756	0.143345	5	5	Q8C878;Q3TL72;F6ZKU4;Q8C878-2
14-3-3 protein zeta/delta	Ywhaz	0.836102	0.799391	1.04592	0.0647776	0.14349	22	16	P63101;D3YXN6;D3YXF4;D3YW45
NADH dehydrogenase [ubiquinone] 1 alpha subcomplex subunit 9, mitochondrial	Ndufa9	1.49866	1.81738	0.824627	-0.278187	0.143519	9	9	Q9DC69
V-type proton ATPase subunit F	Atp6v1f	0.7232	0.87131	0.830015	-0.268791	0.144052	5	5	Q9D1K2;F7B2B4
RNA-binding protein 12	Rbm12;Cpne1	0.592541	0.665484	0.890391	-0.167489	0.144195	6	6	Q8R4X3;F6YJB6;F7C9M1;B7ZCP9;B7ZCQ0;B7ZCQ1
Ribonuclease 4	Rnase4	1.37609	1.64963	0.834181	-0.261568	0.144313	4	4	Q8C7E4;Q9JJH1
Chymotrypsin-like elastase family member 3B	Cela3b	23.8808	42.2518	0.565202	-0.823162	0.144446	4	3	Q9CQ52;A2A9U8
Superoxide dismutase [Cu-Zn]	Sod1	1.57141	1.47109	1.06819	0.0951741	0.145372	8	8	P08228
Small nuclear ribonucleoprotein E	Snrpe	0.837662	0.773073	1.08355	0.115764	0.146486	2	2	P62305;E9Q4F4;E9Q0W8
Constitutive coactivator of PPAR-gamma-like protein 1	FAM120A	1.23654	1.05885	1.16781	0.223811	0.146955	16	16	Q6A0A9
Peroxiredoxin-2	Prdx2	0.99666	1.13259	0.879983	-0.184452	0.147276	9	9	Q61171;D3Z4A4
Cullin-3	Cul3	1.14877	1.28122	0.896622	-0.157428	0.148553	20	20	Q6ZQ84;Q9JLV5;E9Q4T8;F6ZZK0;F6UY44
OX-2 membrane glycoprotein	Cd200	5.11716	3.53669	1.44688	0.532944	0.14887	2	2	O54901;Q80VX2;E9QMY1;Q05D16;E9PZI9
ATP-dependent RNA helicase DDX3X;Putative ATP-dependent RNA helicase Pl10	Ddx3x;D1Pas1	0.73823	0.693645	1.06428	0.0898729	0.149029	27	7	Q3TQX5;Q62167;B9EIA2;P16381;Q3V086;Q61496
Ornithine aminotransferase, mitochondrial	Oat	0.361661	0.301997	1.19756	0.260104	0.149284	12	12	P29758;Q3TG75
DNA replication licensing factor MCM7	Mcm7	0.203845	0.123896	1.64529	0.718343	0.151808	24	24	Q3U4T8;Q61881;D3Z6N3;D3Z2K9;D3Z0J6;D3Z335
Importin subunit alpha-7;Importin subunit alpha;Importin subunit alpha-1	Kpna6;Kpna1	0.611447	0.696659	0.877685	-0.188225	0.152224	4	4	O35345;Q8BH30;Q4FJZ2;Q60960;G3UXF0
Carbohydrate-responsive element-binding protein	Mlxipl	0.710842	0.935437	0.759904	-0.396112	0.152525	2	2	Q99MZ3;Q99MZ3-2;Q99MZ3-3;Q99MZ3-4;Q99MZ3-5;F6Q3B6;F6Q4B6
Protein dpy-30 homolog	Dpy30	0.70176	0.579323	1.21134	0.27661	0.153126	2	2	Q99LT0
von Willebrand factor A domain-containing protein 5B2	Vwa5b2	5.82851	4.53219	1.28603	0.362919	0.153547	10	10	E0CZ01;Q3UR50;Q3UR50-2;F2Z3U9;Q3UR50-5;E9PXM5
Parkinson disease 7 domain-containing protein 1	Pddc1	0.863925	0.715536	1.20738	0.271882	0.153777	4	4	Q8BFQ8
40S ribosomal protein S29	Rps29;Gm10126	0.910804	0.845413	1.07735	0.107484	0.153808	3	3	P62274;D3YYL7
40S ribosomal protein S3a	Gm10119;Rps3a;Gm9000	0.84128	0.806802	1.04273	0.0603714	0.153884	20	20	D3Z6C3;P97351;Q564F3;D3Z7W7
Heat shock protein 75 kDa, mitochondrial	Trap1	0.950915	1.09761	0.866351	-0.206977	0.154076	11	11	Q9CQN1;F6YP65
Tripeptidyl-peptidase 2	Tpp2	0.860226	0.913694	0.941482	-0.0869953	0.154727	28	28	Q64514-2;Q64514
UDP-glucose:glycoprotein glucosyltransferase 1	Uggt1	1.36483	1.46261	0.933147	-0.0998239	0.155303	51	51	Q6P5E4;G3UYG7;G3UZU8;G3UZC1;G3UY73;G3UY35;E9QAH9;E9Q4X2;G3UXP5
Poly(U)-binding-splicing factor PUF60	Puf60	1.10674	0.867768	1.27539	0.350935	0.155308	8	8	Q3UEB3-2;Q3UEB3-3;Q3UEB3
E3 ubiquitin-protein ligase NEDD4-like;E3 ubiquitin-protein ligase	Nedd4l	0.593564	0.511776	1.15981	0.213891	0.155463	5	3	Q8CFI0;Q8CFI0-3;E9PXB7;Q641N8;F7AT14;G3X9H8;Q8CFI0-2
	Ugt2b34	7.885	20.2865	0.388682	-1.36334	0.156662	9	9	Q8K154;E9PZ30;Q8BWQ1;Q6PDD0;Q80X89;D3YUX6
Nidogen-2	Nid2	3.23413	2.36237	1.36902	0.453143	0.15703	4	3	O88322
Succinate dehydrogenase [ubiquinone] iron-sulfur subunit, mitochondrial	Sdhb	1.636	1.58013	1.03536	0.0501295	0.157202	14	14	A2AA77;Q9CQA3
Reticulocalbin-1	Rcn1	5.91572	3.99375	1.48124	0.56681	0.158002	5	5	A2A3Z8;Q05186
Poly(rC)-binding protein 2	Pcbp2	0.838436	0.793585	1.05652	0.0793159	0.15825	11	5	Q61990;Q61990-3;Q61990-2;G3UYM5
Elongation factor 1-alpha 2;Elongation factor 1-alpha	Eef1a2	1.57772	1.86761	0.84478	-0.243352	0.158311	15	4	P62631;B7ZBW3
Microtubule-associated protein RP/EB family member 1	Mapre1	0.54163	0.506004	1.07041	0.0981589	0.158324	10	9	Q3U4H0;Q61166
Serine/threonine-protein kinase PRP4 homolog	Prpf4b	0.701824	0.606241	1.15767	0.211218	0.158533	3	3	C7G3P2;Q61136
Cytochrome c oxidase subunit 7C, mitochondrial	Cox7c;Gm3386	1.14946	1.27323	0.902791	-0.147537	0.158679	2	2	B8JJA8;P17665;E9Q463;G3X8T4
Tetraspanin-8	Tspan8	6.75505	12.5072	0.540093	-0.88872	0.158696	2	2	Q8R3G9
cAMP-dependent protein kinase catalytic subunit alpha	Prkaca	0.897564	0.991874	0.904917	-0.144142	0.158878	14	6	P05132;P05132-2
Serine/threonine-protein phosphatase 2A activator	Ppp2r4	1.19887	1.23513	0.970643	-0.0429877	0.158903	7	7	P58389;Q543N6;A2AWE9;A2AWF0;B7ZDE0;F6Z6I0;D6RFC2
X-ray repair cross-complementing protein 6	Xrcc6	0.799209	0.732511	1.09105	0.125722	0.158911	10	6	P23475;E9PZD4;E9Q163;E9Q4A4
Actin-related protein 2/3 complex subunit 5	Arpc5	1.67384	1.42871	1.17157	0.228449	0.158975	4	4	Q9CPW4;Q3UA72;E9Q2K4
Alpha-1,3/1,6-mannosyltransferase ALG2	Alg2	0.839563	0.751228	1.11759	0.160388	0.159166	10	10	Q9DBE8;F6RBY3
Inosine-5-monophosphate dehydrogenase 2;Inosine-5-monophosphate dehydrogenase	Impdh2	0.531209	0.587167	0.904698	-0.144491	0.159327	13	13	P24547;Q3UAT9
UPF0420 protein C16orf58 homolog	BC017158	0.979662	1.264	0.775049	-0.36764	0.160281	6	6	Q91W34;D6RDS0;Q91W34-2
Transcription elongation regulator 1	Tcerg1	0.83007	0.758541	1.0943	0.130006	0.16072	13	13	Q3TH57;Q8CGF7;Q8CGF7-2;Q8CGF7-3
Density-regulated protein	Denr	1.30763	1.05213	1.24284	0.313641	0.160822	3	3	Q9CQJ6;E9Q0G1
SRA stem-loop-interacting RNA-binding protein, mitochondrial	1810035L17Rik;Slirp	0.610495	0.551155	1.10766	0.147521	0.161166	3	3	Q14AR0;Q9D8T7;F8WHU8;Q9D8T7-2;F7DE82
E3 ubiquitin-protein ligase HERC2	Herc2	0.752869	0.664273	1.13337	0.180623	0.161329	2	2	Q4U2R1;Q4U2R1-2;F8WJE1
Phosphatidylinositol-binding clathrin assembly protein	Picalm	0.661951	0.700343	0.945181	-0.0813372	0.161347	6	5	Q7M6Y3;Q7M6Y3-5;Q7M6Y3-6;Q7M6Y3-4;Q7M6Y3-3;Q3TD51;Q7M6Y3-2
	Atp2b1	1.07477	0.991968	1.08347	0.115662	0.16147	25	14	G5E829;Q0VF55;A2ALL9;Q8C048;Q05CJ5;Q0VF54
Platelet-activating factor acetylhydrolase IB subunit gamma	Pafah1b3	0.549206	0.486338	1.12927	0.175388	0.161696	6	6	Q3TJC2;Q61205;D3Z7E6;D3Z2X5;Q8CA83
Regulator of chromosome condensation	Rcc1	0.865061	0.645949	1.33921	0.421382	0.162818	2	2	Q6PFB2;A2CER1;Q8VE37
Polyadenylate-binding protein 1	Pabpc1	0.708934	0.694595	1.02064	0.0294793	0.162935	25	14	P29341;Q9D4E6;F6ZAX1;Q8C7D3
E3 ubiquitin-protein ligase RNF14	Rnf14	1.13215	1.21092	0.93495	-0.0970384	0.163676	4	4	Q9JI90;G3XA54;Q9JI90-2
Small glutamine-rich tetratricopeptide repeat-containing protein alpha	Sgta	0.734016	0.655104	1.12046	0.164088	0.163835	6	6	Q8BJU0;Q8BJU0-2
Histone H2A;Histone H2A type 1;Histone H2A type 3;Histone H2A type 1-F;Histone H2A type 1-K;Histone H2A.J;Histone H2A type 1-H;Histone H2A.x	Hist3h2a;Hist1h2ad;Hist1h2ab;Hist1h2af;Hist1h2ak;Hist1h2aa;H2afj;Hist1h2ah;H2afx	0.880209	0.743033	1.18462	0.24442	0.163905	6	2	A2AB79;B2RVF0;P22752;Q8BFU2;Q8CGP5;Q8CGP7;Q8CGP4;Q8R1M2;A3KPD0;Q8CGP6;P27661;G3UWL7
Pyruvate dehydrogenase protein X component, mitochondrial	Pdhx	1.18849	1.28878	0.922182	-0.116876	0.164112	4	4	A2AWH6;Q8BKZ9;A2AWH8;A2AWH7
DnaJ homolog subfamily C member 10	Dnajc10	0.594634	0.360826	1.64798	0.720699	0.164773	9	9	Q9DC23
Propionyl-CoA carboxylase beta chain, mitochondrial	Pccb	3.51393	4.0072	0.876904	-0.189509	0.165226	12	12	Q99MN9;E9Q1J7;E9Q5K5;D3YZC1
	Numa1	0.980494	0.939204	1.04396	0.0620702	0.16564	41	19	E9Q7G0;E9QAZ0
E3 ubiquitin-protein ligase MARCH5	2013-03-05	1.13882	1.33663	0.852008	-0.23106	0.166154	2	2	A2RTC8;Q3KNM2
Glucosamine-6-phosphate isomerase 1	Gnpda1	1.3647	1.51269	0.902168	-0.148533	0.166546	7	6	O88958;Q91WJ4;D3Z0R5
RNA 3-terminal phosphate cyclase	Rtcd1	0.6829	0.512319	1.33296	0.414632	0.166674	3	3	Q9D7H3;D6RD00;D3Z263;D6REI7
Malate dehydrogenase, cytoplasmic	Mdh1	1.35422	1.30899	1.03455	0.0490081	0.167376	15	15	P14152;B1ATQ3
Acetyl-CoA acetyltransferase, mitochondrial	Acat1	1.097	1.18647	0.924591	-0.113112	0.167853	19	19	Q8QZT1
Conserved oligomeric Golgi complex subunit 6	Cog6	1.01648	1.59286	0.638148	-0.648038	0.168209	5	5	Q8R3I3;Q8BRB0
	Tmpo	0.724188	0.680556	1.06411	0.0896504	0.168209	18	2	Q3TNH0;Q61029-3;Q61029-2;Q61029-4;Q3TXQ1
BAG family molecular chaperone regulator 5	Bag5	1.16671	1.30981	0.890748	-0.166912	0.168239	6	6	Q8CI32;E0CYW3;E0CX76
X-ray repair cross-complementing protein 5	Xrcc5	0.974156	0.887819	1.09725	0.133887	0.1686	6	6	P27641
Cysteine-rich with EGF-like domain protein 2	Creld2	0.919852	1.00673	0.913703	-0.130203	0.16867	9	9	Q9CYA0
Acyl-CoA synthetase family member 3, mitochondrial	Acsf3	1.24247	1.50305	0.826633	-0.274682	0.168683	11	11	Q3URE1;F8WGZ0;Q3URE1-2
U5 small nuclear ribonucleoprotein 40 kDa protein	Snrnp40	0.767435	0.67291	1.14047	0.189631	0.169273	5	5	Q6PE01;Q3UFK4
Myelin expression factor 2	Myef2	0.726542	0.690264	1.05256	0.073898	0.169645	16	16	Q8C854;Q8C854-3;G8JL68;A2ATP6;A2ATP5;Q8C854-2;F6XJA1;Q8C854-1
Cell division cycle and apoptosis regulator protein 1	Ccar1	1.02439	0.906074	1.13058	0.177064	0.169679	10	10	Q8CH18;Q8CH18-3;Q8CH18-2
UMP-CMP kinase	Cmpk1	0.831494	0.782611	1.06246	0.0874105	0.169948	7	7	Q9DBP5
DnaJ homolog subfamily B member 9	Dnajb9	2.79419	3.38391	0.825728	-0.276261	0.170532	7	7	Q5D0C3;Q9QYI6
Collagen type IV alpha-3-binding protein	Col4a3bp	0.816116	0.780855	1.04516	0.0637196	0.171114	5	5	Q9EQG9;Q9EQG9-2;Q9EQG9-3
Kinesin-like protein KIF1A	Kif1a	0.917866	1.44335	0.635928	-0.653066	0.171123	7	7	E9Q9G6;Q6TA13;G3UW47;P33173;E9QAN4;Q5DTN3;A2AH79;Q60575;A2AH78;Q60575-2
PHD finger protein 6	Phf6	0.472139	0.397899	1.18658	0.246809	0.171519	3	3	Q9D4J7;E9QAG2;Q9D4J7-2
60S ribosomal protein L34	Gm10154;Rpl34;Gm6404	0.781337	0.860874	0.907609	-0.139857	0.171592	4	4	D3Z4H3;Q9D1R9;D3YZW2;D3YWC0
Prostaglandin E synthase 3	Ptges3	1.02408	0.702803	1.45714	0.543136	0.171735	4	4	Q9R0Q7;E9PXA6;D3Z7C6
Protein NipSnap homolog 2	Gbas	5.38898	3.78927	1.42217	0.508092	0.171738	4	4	O55126;Q7TMG8
Dihydropyrimidinase-related protein 3	Dpysl3	1.86514	1.33861	1.39334	0.478548	0.172153	7	4	E9PWE8;Q62188;Q3TT92;D3YUS0;D3Z567
Cytochrome b-c1 complex subunit 2, mitochondrial	Uqcrc2	1.62422	1.66015	0.978357	-0.0315665	0.17262	13	13	Q9DB77
Transcriptional activator protein Pur-beta	Purb	0.665895	0.569379	1.16951	0.225905	0.173129	8	8	O35295;Q8R4E6;Q8R4E6-2
Ectonucleotide pyrophosphatase/phosphodiesterase family member 5	Enpp5	0.471175	0.560259	0.840995	-0.249831	0.174047	5	5	Q9EQG7
S-formylglutathione hydrolase	Esd	1.30653	1.36714	0.955667	-0.0654207	0.174067	9	9	H3BKH6;Q9R0P3;H3BJL6;H3BLJ9;H3BJP2;H3BK43;H3BJC6;H3BL99
Histone H1.0	H1f0	2.19132	1.99513	1.09833	0.135317	0.174242	6	6	P10922
E3 ubiquitin-protein ligase BRE1B	Rnf40	0.680478	0.613229	1.10966	0.150123	0.174595	4	4	Q3U319
Exocyst complex component 3	Exoc3	1.11115	1.28879	0.862165	-0.213964	0.17491	6	6	Q6KAR6;Q8K0E2
DBIRD complex subunit ZNF326	Znf326;Zfp326	0.720199	0.637478	1.12976	0.17602	0.175242	6	6	O88291;E9Q662;D3YXQ7;O88291-2;O88291-3;D6RG92
Dynactin subunit 3	Dctn3	1.05051	1.21366	0.865572	-0.208274	0.175279	4	4	Q9Z0Y1;E9Q919
	Spnb3	0.939715	1.00324	0.93668	-0.0943716	0.175922	19	15	Q68FG2
Protein NDRG1	Ndrg1	1.01254	1.12213	0.902338	-0.148261	0.176121	6	6	Q545R3;Q62433;E9Q514;E9PVF3;E9Q3F9;E9Q5I8;F6VLR8;E9Q7V2;E9Q147;E9Q7G8;E9PZC7;E9Q0J8
Cation-independent mannose-6-phosphate receptor	Igf2r	1.17389	1.26264	0.929711	-0.105146	0.177176	14	14	Q07113
Actin-related protein 2/3 complex subunit 3	Arpc3	1.70499	1.50219	1.135	0.182696	0.177707	5	5	Q9JM76;H7BWZ3;D3Z2F8;D3Z2F7
Pyruvate kinase isozymes M1/M2	Pkm2	0.797808	0.860424	0.927227	-0.109006	0.178322	35	5	P52480
Serine/threonine-protein phosphatase 2A 55 kDa regulatory subunit B alpha isoform	Ppp2r2a	0.685914	0.65385	1.04904	0.069068	0.178676	5	4	Q571J7;Q6P1F6;Q9CWU3;Q8BG02
Uncharacterized protein C17orf62 homolog		1.96139	1.82446	1.07505	0.104407	0.178698	2	2	Q3TYS2
Histone H3;Histone H3.3C;Histone H3.1;Histone H3.2;Histone H3.3	H3f3a;Hist2h3b;Gm10257;H3f3c;Hist1h3a;Hist1h3b;Gm6132	0.670449	0.625292	1.07222	0.100598	0.178744	6	6	A2A852;B9EI85;E9PV77;P02301;P68433;P84228;P84244;F8WI35;E0CZ27;E9PZA5;E0CYR7;E0CYN1
Eukaryotic translation initiation factor 4B	Eif4b	1.08033	0.97801	1.10462	0.143551	0.179743	12	12	Q8BGD9;Q3TDD8
Cleavage stimulation factor subunit 1	Cstf1	0.598864	0.49571	1.20809	0.272732	0.180293	5	5	A2AP97;Q99LC2;A2APA3
Cell cycle control protein 50A	Tmem30a	1.21034	1.6303	0.742403	-0.429725	0.180797	3	2	Q8VEK0;D3YVV1
Bifunctional ATP-dependent dihydroxyacetone kinase/FAD-AMP lyase (cyclizing);ATP-dependent dihydroxyacetone kinase;FAD-AMP lyase (cyclizing)	Dak	1.81236	1.22145	1.48378	0.569275	0.180938	7	7	Q8VC30;Q3UTZ4
Titin	Ttn	0.807334	0.677388	1.19183	0.253183	0.181311	5	5	A2ASS6;E9Q8K5;E9Q8N1;A2ASS6-2;E9Q8M7;F6ZVZ7;F7CR78;F6RSJ3
Small nuclear ribonucleoprotein Sm D1	Snrpd1	0.803114	0.739497	1.08603	0.11906	0.181763	3	3	P62315
Cyclin-dependent kinase inhibitor 1B	Cdkn1b	0.500281	0.311801	1.60449	0.682113	0.181811	4	4	P46414;Q8BG74
Sodium/potassium-transporting ATPase subunit alpha-1	Atp1a1	0.626605	0.573647	1.09232	0.127393	0.181815	43	28	Q8VDN2;E9QAV3;E9QNX7;Q64436;Q91WH7
	Nbas	1.34469	1.20729	1.11381	0.155501	0.182133	18	18	E9Q411;Q9D3Z9
ATP-dependent Clp protease ATP-binding subunit clpX-like, mitochondrial	Clpx	1.30569	1.41293	0.924101	-0.113878	0.182211	4	4	Q9JHS4;Q6P8N8;F7BB92
Transcription elongation factor A protein 1	Tcea1	0.646975	0.562458	1.15026	0.201965	0.182284	11	11	P10711;Q3UWX7;E9PYD5;P10711-2;Q810R3;Q9QVN7;F6XMY4;B7ZCS4;E9Q5I5
NADPH:adrenodoxin oxidoreductase, mitochondrial	Fdxr	0.818127	1.08372	0.754925	-0.405595	0.182642	5	5	A2A6S3;Q61578
Proteasome-associated protein ECM29 homolog	Ecm29;AI314180	1.11285	0.98505	1.12974	0.17599	0.182775	19	19	Q6PDI5;Q6PDI5-2;A2ALV7;A2ALV6;A2ALV8;A2ALW1;A2ALV9
Elongation factor 1-gamma	Eef1g	0.667482	0.636727	1.0483	0.068054	0.182799	18	18	Q4FZK2;Q9D8N0
Transcription elongation factor SPT6	Supt6h	0.77285	0.696414	1.10976	0.150243	0.183056	13	13	Q62383
Histone H2B;Histone H2B type 2-E;Histone H2B type 3-B;Histone H2B type 3-A	Hist3h2ba;Hist2h2be;Hist3h2bb	1.53722	1.10427	1.39207	0.477231	0.183139	5	2	A2AB77;Q64524;Q8CGP0;Q9D2U9
Na(+)/H(+) exchange regulatory cofactor NHE-RF2	Slc9a3r2	2.89494	1.30439	2.21938	1.15016	0.183205	6	6	Q9JHL1;Q6NS54;Q9JHL1-2
Transmembrane emp24 domain-containing protein 2	Tmed2	1.85134	1.78223	1.03878	0.0548863	0.183523	4	4	A2RS53;Q9R0Q3;F6V6T4;E9PVS9;Q8BPI2
Dynein light chain 2, cytoplasmic	Dynll2	1.05224	1.13819	0.924485	-0.113278	0.184448	6	4	B2KGQ2;Q9D0M5;D6RIN4;Q80ZS7;G5E8Z1
Ran-specific GTPase-activating protein	Ranbp1	0.482704	0.410979	1.17452	0.232074	0.184562	6	6	P34022;H7BX22
Histidine triad nucleotide-binding protein 3	Hint3	5.43654	5.02082	1.0828	0.114766	0.185295	4	4	Q9CPS6;F8WH96;E9Q7F8
Phenylalanine--tRNA ligase beta subunit	Farsb	0.88199	0.824755	1.0694	0.0967967	0.185548	20	20	Q9WUA2;E9PXM4
Lanosterol synthase	Lss	1.16675	1.45811	0.80018	-0.321604	0.185701	8	8	Q8BLN5
V-type proton ATPase subunit D	Atp6v1d	0.753487	0.819669	0.919258	-0.121459	0.185744	9	9	P57746;Q3U861;F6XGK5;E9Q0D9
Nicastrin	Ncstn	0.971697	0.903071	1.07599	0.105667	0.186437	3	3	F6UF97;P57716
Bone morphogenetic protein 1	Bmp1	0.723747	0.591892	1.22277	0.290152	0.18722	10	9	Q6NZM2;E9QQ01;P98063;Q570Z4;Q9WVM6;E9Q5B9
ATP-dependent RNA helicase DDX39A	Ddx39a;Ddx39	0.288254	0.18904	1.52483	0.608649	0.187449	15	3	Q8VDW0;Q3UAF1;D6RHT5;Q8VDW0-2
Beta-galactosidase	Glb1	0.900363	0.718886	1.25244	0.324744	0.187515	11	11	P23780;Q3TAW7;E9PVK3;F7AF87
40S ribosomal protein S10	Rps10	1.22233	1.08015	1.13163	0.178402	0.187779	5	5	P63325;Q5M9K7;Q3UW83
Neutral cholesterol ester hydrolase 1	Nceh1	1.08358	0.943675	1.14826	0.199444	0.187793	8	8	Q8BLF1;Q8BYQ0;D6RGP7
Endoplasmic reticulum-Golgi intermediate compartment protein 1	Ergic1	1.50889	1.39842	1.079	0.10969	0.187943	8	8	Q4FK22;Q9DC16;F6SLP4;F6Z6A5
Tubulin beta-4A chain	Tubb4a	2.01687	2.77252	0.72745	-0.45908	0.18814	21	4	Q9D6F9
Protein phosphatase 1 regulatory subunit 1A	Ppp1r1a	1.30442	1.56296	0.834583	-0.260872	0.188738	5	5	Q9ERT9
Protein argonaute-2	Eif2c2	2.14515	2.49285	0.860521	-0.216718	0.189499	11	8	Q8CJG0;Q8CJF9;H3BJ70;F8WGV6
Histone-binding protein RBBP7	Rbbp7	0.454413	0.432485	1.0507	0.071354	0.189997	10	4	Q60973;A2AFJ1;A2AFI9;F6ZLC6;F6U539
Serine/threonine-protein kinase MST4	2610018G03Rik;Mst4	1.741	1.8485	0.941845	-0.0864388	0.190115	9	4	A2AD85;Q99JT2;A2AD84
Alpha-centractin	Actr1a	1.07817	0.664707	1.62202	0.697794	0.190255	10	3	P61164
Protoporphyrinogen oxidase	Ppox	1.52687	1.21527	1.2564	0.3293	0.190273	2	2	P51175
Succinate dehydrogenase cytochrome b560 subunit, mitochondrial	Sdhc	1.23406	1.32394	0.932112	-0.101425	0.190708	3	3	Q9CZB0;F8WGB3
Poly(rC)-binding protein 1	Pcbp1	0.787199	0.766655	1.0268	0.0381509	0.190977	12	8	P60335;P57724
Ras-related GTP-binding protein C;Ras-related GTP-binding protein D	Rragc;Rragd	0.918842	0.986023	0.931867	-0.101804	0.191108	7	7	Q99K70;B1AWT3;Q7TT45;B1AWT2;B1AWT4;Q99K70-2
Ankyrin-2	Ank2	0.885393	1.1237	0.787926	-0.343867	0.191344	13	10	Q8C8R3-4;E9PW46;F7CK09;Q8C8R3-2;Q8C8R3;E9Q2E1;Q8C8R3-5;F6S5N7;F7AM67;F6Z2A0;Q8C8R3-3;Q8C8R3-6;H7BX63;Q8C8R3-7;Q8C8R3-8
Nesprin-2	Syne2	0.461553	0.59428	0.776659	-0.364647	0.19149	6	5	Q6ZWQ0;E9QP46;Q6DFZ2;Q6ZWQ0-3;F6W8R9;F7BX34
Ras-related protein Rab-5B	Rab5b	1.38872	1.46007	0.951132	-0.0722818	0.191916	5	2	B2RPS1;P61021
	Sec24b	1.27313	1.19419	1.0661	0.0923473	0.192014	6	6	Q80ZX0;F6VJC5;Q3U882;F6YIN5
78 kDa glucose-regulated protein	Hspa5	1.41278	1.50516	0.938624	-0.09138	0.192149	48	46	A2AUF6;P20029
Heterogeneous nuclear ribonucleoprotein L	Hnrnpl	0.904627	0.835947	1.08216	0.113912	0.192178	15	15	G5E924;E9Q8W8;Q8R081;G3UY38;G3UY56
Polyadenylate-binding protein-interacting protein 1	Paip1	0.699702	0.617472	1.13317	0.180367	0.192249	4	4	F6Y616;G3UYE5;Q8VE62;D3Z3J6;G3UZ67
Torsin-3A	Tor3a	1.59707	1.10936	1.43963	0.5257	0.192378	4	4	Q9ER38
40S ribosomal protein S21	Rps21	0.972203	0.899861	1.08039	0.111555	0.192424	6	6	A2ABW8;Q9CQR2
Nitrilase homolog 1	Nit1	1.53456	1.44059	1.06523	0.0911653	0.192923	5	5	Q8VDK1;Q8VDK1-2;D3YY53;D3Z3I3;D3Z2Y2
Cathepsin D	Ctsd	0.813843	0.780329	1.04295	0.060668	0.192948	9	9	Q8C243;P18242;Q3UCD9;F6Y6L6;F8WIR1;Q05BF3
60S ribosomal protein L7	Rpl7;Gm5045	0.809919	0.898607	0.901305	-0.149913	0.19303	15	15	P14148;Q5M9N8;D3Z6N4;F6XI62;F6ZA13
Ubiquitin-conjugating enzyme E2 variant 1;Ubiquitin-conjugating enzyme E2 variant 2	Gm20431;Ube2v1;Gm8325;Ube2v2;Gm10088;Gm5830	1.02624	0.894766	1.14694	0.197786	0.193112	4	4	E9PY39;B7ZBY7;Q569Y6;Q9CZY3;D3Z1I3;Q4VBX4;Q9D2M8;Q9CZY3-2;Q9D2M8-2;D3Z6R2;B7ZBY6;D3YXL3;A6X925;B2KF55
AP2-associated protein kinase 1	Aak1	2.15201	1.70144	1.26482	0.338929	0.193581	10	10	Q3UHJ0;Q3UHJ0-2
Very long-chain specific acyl-CoA dehydrogenase, mitochondrial	Acadvl	1.48422	1.59079	0.933008	-0.100038	0.194894	15	15	B1AR27;P50544;B1AR28
Vacuolar protein sorting-associated protein 52 homolog	Vps52	0.720482	0.835506	0.86233	-0.213688	0.195046	3	3	Q8C754;Q8C754-2;G3UY33
Carboxypeptidase N catalytic chain	Cpn1	0.733296	0.685431	1.06983	0.0973842	0.195285	7	7	Q9JJN5;CON__Q2KJ83
Vacuolar protein sorting-associated protein 35	Vps35	0.885756	0.82991	1.06729	0.0939544	0.195771	24	24	Q3TRJ1;Q9EQH3
40S ribosomal protein S20	Rps20	1.14337	1.11208	1.02814	0.0400318	0.195879	5	5	P60867;Q5BLK2
Histone H1.3	Hist1h1d	1.35622	1.10665	1.22552	0.293392	0.196549	10	2	P43277;Q149Z9;Q07133
Transmembrane protein 33	Tmem33	0.945169	0.90551	1.0438	0.0618417	0.196867	4	4	Q9CR67;Q9CZM3
Sulfhydryl oxidase 2	Qsox2	1.17223	1.38421	0.846858	-0.239807	0.197027	4	4	Q3TMX7;Q3TMX7-2;Q3TMX7-3
Vesicle-fusing ATPase	Nsf	0.813564	0.85177	0.955145	-0.0662081	0.197331	32	32	P46460;G3UX86;G3UX98
Glucocorticoid receptor	Nr3c1	0.955086	1.09786	0.869952	-0.200992	0.197538	2	2	E9PYV1;E9PUR6;E9QM82;P06537-2;P06537;P06537-4;P06537-3;E9Q310;E9Q8A6
Torsin-1A-interacting protein 2	Tor1aip2	2.36161	2.57278	0.917921	-0.123557	0.198222	3	2	Q8BYU6
AT-rich interactive domain-containing protein 1A	Arid1a	0.531864	0.594054	0.895313	-0.159537	0.198247	5	5	E9QAQ7;A2BH40;A2BH40-2;A2BH40-4;A2BH40-3
Serine/arginine-rich splicing factor 9	Srsf9	0.900095	0.804179	1.11927	0.162561	0.198892	7	7	Q9D0B0;F6RTE1
Histone deacetylase 1;Histone deacetylase	Hdac1;Gm10093	0.58554	0.47022	1.24525	0.316432	0.199249	5	3	O09106;Q58E49;D3YYI8
10 kDa heat shock protein, mitochondrial	Hspe1	1.79259	1.89992	0.943508	-0.0838931	0.199649	12	12	Q4KL76;Q64433
COX assembly mitochondrial protein homolog	Cmc1	1.08963	0.964013	1.13031	0.176714	0.199802	2	2	Q9CPZ8
Tubulin beta-6 chain	Tubb6	0.775916	1.27997	0.606199	-0.722138	0.200084	15	3	Q3UMM1;Q922F4
Baculoviral IAP repeat-containing protein 6	Birc6	0.930005	0.825463	1.12665	0.172035	0.200925	4	4	O88738;O88738-2;O88738-3;H9KUX8;REV__O88738;REV__O88738-2;REV__O88738-3;REV__H9KUX8;REV__Q5NCS9
Small nuclear ribonucleoprotein-associated protein N;Small nuclear ribonucleoprotein-associated protein;Small nuclear ribonucleoprotein-associated protein B	Snrpn;Snrpb	0.587549	0.543708	1.08063	0.111877	0.20105	7	7	P63163;Q3UN87;A2APD4;P27048
Ras-related protein Rab-11B;Ras-related protein Rab-11A	Rab11b;Rab11a	1.19974	1.2693	0.945198	-0.0813113	0.20113	8	8	P46638;Q78ZJ8;P62492;Q0PD45;F8WGS1;E9Q3P9;G3UY29;G3UZD3;G3UZL4;E9Q6B3
Activity-dependent neuroprotector homeobox protein	Adnp	0.601248	0.536495	1.1207	0.164395	0.201468	3	3	A2BDX0;Q9Z103
Carnitine O-palmitoyltransferase 1, liver isoform	Cpt1a	0.785699	1.06562	0.737316	-0.439644	0.202084	4	4	P97742;Q7TQD5;Q924X2
Translocating chain-associated membrane protein 1	Tram1	1.63669	1.76038	0.929737	-0.105106	0.202282	4	4	Q4FK14;Q91V04
NADH dehydrogenase [ubiquinone] iron-sulfur protein 4, mitochondrial	Ndufs4	1.58722	1.66958	0.95067	-0.0729831	0.202625	3	3	E9QPX3;Q9CXZ1
Malignant T-cell-amplified sequence 1	Mcts1	1.36898	1.29979	1.05323	0.0748228	0.20285	7	7	Q9DB27-2;Q9DB27;Q9CQ21
SH3 domain-binding glutamic acid-rich-like protein	Sh3bgrl	1.31046	1.53216	0.855302	-0.225494	0.203156	5	5	Q9JJU8
Transmembrane protein 11, mitochondrial	Tmem11	1.29351	1.65736	0.780464	-0.357596	0.203301	2	2	Q8BK08;E9Q933
Hydroxyacyl-coenzyme A dehydrogenase, mitochondrial	Hadh	3.71561	4.11548	0.902838	-0.147462	0.203482	17	17	Q61425
RuvB-like 1	Ruvbl1	0.735888	0.694734	1.05924	0.0830255	0.203787	13	13	P60122;Q3U1C2;D3YW60;Q05CB6
60S ribosomal protein L26	Rpl26;Rpl26-ps4;Rpl26-ps2	1.02775	0.957667	1.07318	0.101893	0.203875	6	6	P61255;Q4FZH2;B1ARA5;B1ARA3;G3UW96;D3Z3Q9
Transcriptional regulator ATRX	Atrx	0.49294	0.462576	1.06564	0.0917216	0.204306	9	9	Q61687;E9QAC3;F6RDB7;Q8C2S3;Q3UY26;A6PWK8;A6PWK7
TAR DNA-binding protein 43	Tardbp	0.810639	0.762933	1.06253	0.0875032	0.204418	9	9	Q544R5;Q921F2;Q6VYI4;Q6VYI5;Q8BLD4;Q8R0B4;E9Q830;F8WIJ9
Ubiquitin-like-conjugating enzyme ATG3	Atg3	0.98161	1.23098	0.797422	-0.326585	0.205137	3	3	Q9CPX6
BRCA2 and CDKN1A-interacting protein	Bccip	0.579739	0.489649	1.18399	0.243656	0.205204	3	3	Q9CWI3
Squamous cell carcinoma antigen recognized by T-cells 3	Sart3	0.716072	0.661941	1.08178	0.113402	0.205651	14	14	Q9JLI8;Q9JLI8-2
Exosome complex component CSL4	Exosc1	0.411145	0.382761	1.07416	0.103203	0.205719	2	2	Q9DAA6;Q9DAA6-2
Neuronal pentraxin receptor	Cbx6;Nptxr	1.82014	2.10764	0.863592	-0.211579	0.206612	3	3	E9Q1P4;F6T7F3;F7BX42;F8VQB8;F7CHP1;E9PZM8;Q99J85
Ubiquitin carboxyl-terminal hydrolase 48	Usp48	0.714047	0.743769	0.960039	-0.0588356	0.206879	2	2	Q3V0C5-2;Q3V0C5-5;A2ALS0;Q3V0C5;A2ALR9;A2ALR8;Q3V0C5-3;Q3V0C5-4;B7ZNK5;A2BDP2
60S ribosomal protein L23a	Rpl23a-ps3;Rpl23a;Gm8290;Gm10335;Gm8112;Gm8264;Gm3940;Gm10923	0.943529	0.906535	1.04081	0.0577041	0.206995	10	10	D3YWP3;P62751;Q5M9M5;F8WH61;D3Z1D6;D3Z5J8;D3Z5J9;D3YU45;D3YU46;D3YW68;D3YW72;D3YTY6;D3YTY5;D3Z2I1
PR domain zinc finger protein 16	Prdm16	0.730995	0.882259	0.828549	-0.271341	0.207043	2	2	A2A933;A2A935-3;A2A935;A2A931;A2A930;A2A935-2;A2A934;E9PYH5;E9PW58
Protein FAM177A1	Fam177a1	1.3638	0.55341	2.46436	1.30121	0.208041	2	2	Q8BR63
[Pyruvate dehydrogenase [lipoamide]] kinase isozyme 1, mitochondrial	Pdk1	3.87057	4.09305	0.945644	-0.0806302	0.208333	2	2	Q8BFP9
Proteasome activator complex subunit 1	Psme1	1.11753	1.21979	0.916166	-0.126319	0.20838	13	12	P97371;Q5HZK3;G3UXZ5;G3UXY0;G3X9K9;G3UWN9;G3UXR1
Casein kinase II subunit beta	Csnk2b	0.665139	0.619415	1.07382	0.10275	0.208556	2	2	P67871;G3UZJ5;G3UXG7;G3UZX4;G3UWL3;G3UZA4
Peptidyl-prolyl cis-trans isomerase FKBP11	Fkbp11	1.93164	1.75384	1.10138	0.139309	0.208753	5	5	Q9D1M7
H/ACA ribonucleoprotein complex subunit 1	Gar1	1.21501	0.846235	1.43578	0.521838	0.208888	2	2	Q9CY66;Q9CY66-2;G5E8M6;Q9CY66-3;D3YZ09
Glutamyl aminopeptidase	Enpep	1.22737	0.89197	1.37602	0.460503	0.210054	3	3	P16406;Q52JJ6;F7B9G4;F6YHW2;Q6P3C1
Toll-interacting protein	Tollip	1.85403	1.97831	0.937179	-0.0936039	0.212203	5	5	A6PWS1;Q9QZ06;A9JEI5;Q8C5G6
HAUS augmin-like complex subunit 4	Haus4	1.33135	1.45381	0.915766	-0.126949	0.212348	2	2	Q8BFT2
Protein canopy homolog 4	Cnpy4	0.549208	0.638509	0.860141	-0.217354	0.212743	4	4	Q8BQ47;D3Z0T5
Uncharacterized protein KIAA0564 homolog	Kiaa0564	1.91562	1.78228	1.07481	0.104087	0.213295	26	26	Q8CC88;Q8CC88-2;Q9DBH4;F8WHW7
Cleavage and polyadenylation specificity factor subunit 7	Cpsf7	0.830351	0.705845	1.17639	0.23437	0.213385	3	3	Q8BTV2;Q8BTV2-2;Q8BTV2-3
Cadherin-2	Cdh2	1.02028	0.800286	1.27489	0.350378	0.213607	3	3	P15116;D3YYT0;A2AC73;P39038
Pre-mRNA-splicing factor SPF27	Bcas2	0.624724	0.574859	1.08674	0.120011	0.2138	4	4	Q9D287
Endothelin-converting enzyme 1	Ece1	0.667902	0.604713	1.10449	0.143386	0.214428	13	13	Q4PZA2;Q4PZA2-4;Q4PZA2-2;Q4PZA2-3;B1AXF8
von Willebrand factor A domain-containing protein 5A	Vwa5a	3.18153	2.95117	1.07806	0.108434	0.214869	10	10	Q99KC8;F6TIL5;Q8BGF0;Q6P8K4
Protein syndesmos	Nudt16l1	1.23886	1.34117	0.923716	-0.114479	0.214905	3	2	Q8VHN8;Q8VHN8-2;E9Q9G1;Q8VHN8-3
Neurofilament medium polypeptide	Nefm	0.353757	0.564459	0.626719	-0.67411	0.214933	8	7	P08553;D3YZ35;P19246;F7A3A1
Protein CDV3	Cdv3	1.03334	0.8812	1.17265	0.229774	0.215264	5	5	Q4VAA2;Q4VAA2-2;F8WGL9
Ribosome maturation protein SBDS	Sbds	1.25852	1.0117	1.24397	0.314947	0.215567	7	7	P70122;F6TN03;D6REV5
SUN domain-containing protein 1	Sun1	1.25509	1.392	0.901645	-0.149368	0.215962	7	7	Q9D666;Q9D666-3;Q9D666-4;Q9D666-2;D3Z0V9;F6RMJ1;F6XYA0;F7BX07;Q3TSM1
F-box-like/WD repeat-containing protein TBL1X;F-box-like/WD repeat-containing protein TBL1XR1	Tbl1x;Tbl1xr1	0.641507	0.598026	1.07271	0.101257	0.216019	8	8	B1AVT9;Q9QXE7;Q8BHJ5
Coatomer subunit delta	Arcn1	1.85927	1.78809	1.03981	0.0563169	0.216032	29	29	Q5XJY5
Microtubule-associated protein 6	Map6;Mtap6	1.90719	2.00394	0.95172	-0.0713907	0.216549	4	4	Q7TSJ2;Q7TSJ2-2;D3Z6W1;Q7TSJ2-3
Mitochondrial import inner membrane translocase subunit Tim13	Timm13	1.04579	0.955672	1.0943	0.130006	0.216786	6	6	P62075
Nuclear pore complex protein Nup133	Nup133	0.743459	0.656618	1.13225	0.179199	0.216908	5	5	Q8R0G9
Drebrin-like protein	Dbnl	1.15854	1.03118	1.12351	0.168012	0.217023	8	8	Q62418;Q62418-2;Q62418-3
28S ribosomal protein S27, mitochondrial	Mrps27	0.723028	0.448559	1.61189	0.688754	0.217554	4	4	Q8BK72
WASH complex subunit strumpellin	Kiaa0196	1.21943	1.09327	1.1154	0.157557	0.217685	5	5	Q8C2E7;Q8C2E7-2
Adenylosuccinate lyase	Adsl	1.24261	1.16776	1.0641	0.0896298	0.217796	9	9	P54822;E9Q242;E9Q3T7;E9Q0A0
Pyrroline-5-carboxylate reductase 3	Pycrl	1.5229	1.33058	1.14454	0.194766	0.21785	5	5	Q9DCC4
Protein RER1	Rer1	1.42539	1.27579	1.11726	0.159966	0.218118	4	4	B1AUE6;Q9CQU3
Niban-like protein 1	Fam129b	2.60046	3.55795	0.730887	-0.452279	0.218495	7	7	Q8R1F1;A2ARS6
Peroxiredoxin-5, mitochondrial	Prdx5	2.13314	2.04709	1.04204	0.0594041	0.219792	9	9	H3BJQ7;P99029;E9Q9H9;P99029-2;G3UZJ4
NADH dehydrogenase [ubiquinone] iron-sulfur protein 5	Ndufs5	1.57909	1.69456	0.931858	-0.101817	0.219877	7	7	Q99LY9;B1ARW4
60S ribosomal protein L8	Rpl8	0.96764	1.02671	0.942467	-0.0854864	0.220089	8	8	P62918
Eukaryotic peptide chain release factor GTP-binding subunit ERF3A	Gspt1	0.618753	0.577424	1.07157	0.0997325	0.220435	13	8	Q8R050;Q8R050-2
Haloacid dehalogenase-like hydrolase domain-containing protein 2	Hdhd2	2.66982	2.29947	1.16106	0.215441	0.220476	4	4	Q3UGR5;Q3UGR5-2;D3YZI3
	Skiv2l	1.89815	1.68556	1.12612	0.171366	0.221192	9	9	Q6NZR5;G3UYT1
Cytochrome b-c1 complex subunit 9	Uqcr10	1.77509	1.94092	0.914561	-0.128848	0.221913	2	2	Q5NCJ9;Q8R1I1
Golgin subfamily A member 7	Golga7	2.8479	1.29088	2.20617	1.14154	0.222039	3	3	Q91W53;Q91W53-2
Basigin	Bsg	0.786427	1.92327	0.408901	-1.29018	0.222091	3	3	P18572;P18572-2
ATP-binding cassette sub-family F member 3	Abcf3	1.3362	0.908214	1.47124	0.557032	0.222258	2	2	Q8K268
Endoplasmic reticulum resident protein 44	Erp44	1.93022	2.07041	0.932289	-0.101151	0.222283	14	14	B1AY76;Q9D1Q6
Actin, alpha cardiac muscle 1;Actin, aortic smooth muscle;Actin, gamma-enteric smooth muscle;Actin, alpha skeletal muscle	Actc1;Acta2;Actg2;Acta1	1.47778	1.40051	1.05517	0.0774792	0.222354	18	5	P68033;Q497E4;P62737;P63268;Q3UJ36;P68134;D3YZY0;D3Z2K3
Gamma-soluble NSF attachment protein	Napg	1.34204	1.40966	0.952031	-0.0709196	0.22316	8	8	D3Z4B2;Q9CWZ7
Prolyl endopeptidase-like	Prepl	1.12945	0.873092	1.29362	0.371415	0.223833	6	6	Q8C167;Q8C167-2;Q8C167-3;Q8C167-4
Spectrin alpha chain, brain	Spna2;Sptan1	1.45838	1.5561	0.937202	-0.0935681	0.223981	98	97	A3KGU7;E9Q447;P16546;A3KGU5;P16546-2;A3KGU9;A3KGU4
Alpha-actinin-4	Actn4	0.788416	0.811869	0.971112	-0.0422899	0.224085	49	33	P57780;Q3ULT2;E9Q2W9;D3Z0L8;D3Z761;O88990
Translin	Tsn	0.754681	0.686308	1.09962	0.137011	0.224091	7	7	Q545E6;Q62348
Programmed cell death protein 5	Pdcd5	0.722123	0.778034	0.928138	-0.107589	0.224129	5	5	P56812;Q564F6;D3Z7Q5
Beta-hexosaminidase subunit beta	Hexb	0.650831	0.57066	1.14049	0.189652	0.22469	11	11	P20060;Q3TXR9
Pro-neuropeptide Y;Neuropeptide Y;C-flanking peptide of NPY	Npy	0.220856	0.125767	1.75607	0.812353	0.226238	3	3	P57774
Translocon-associated protein subunit alpha	Ssr1	1.36964	1.28475	1.06608	0.0923091	0.226661	3	3	E9Q9A7;Q9CY50
Reticulocalbin-2	Rcn2	1.57181	1.77956	0.883258	-0.179094	0.226972	7	7	Q8BP92
Bystin	Bysl	1.21291	0.996875	1.21671	0.282988	0.227246	2	2	O54825
Oxidoreductase NAD-binding domain-containing protein 1	Oxnad1	1.21977	1.06651	1.1437	0.193712	0.227849	2	2	Q8VE38;Q8VE38-2;E9Q8U8;E9Q690;E9PZL5;E9Q2B7;F6XLU3
Translocation protein SEC62	Sec62	1.19997	1.12397	1.06762	0.0943948	0.228129	4	4	Q8BU14
Heterogeneous nuclear ribonucleoprotein L-like	Hnrpll	0.844802	0.761891	1.10882	0.149029	0.230267	11	11	Q921F4;F6SB69;Q921F4-4
DNA replication licensing factor MCM5	Mcm5	0.194776	0.125789	1.54843	0.63081	0.230356	27	27	Q52KC3;P49718
Abl interactor 1	Abi1	1.09886	1.2119	0.906725	-0.141263	0.230428	3	3	B7ZCT9;Q8CBW3;B7ZCU0;Q3TJ64;Q8CBW3-3;Q3TJR5;Q8CBW3-4;B7ZCU3;B7ZCU4;Q3TPY5;Q8CBW3-2;B7ZCU5;B7ZCU2;B7ZCU1;Q8CBW3-5
Dual specificity mitogen-activated protein kinase kinase 1	Map2k1	1.463	1.57848	0.926841	-0.109606	0.230689	5	3	P31938;Q3TMJ8
General vesicular transport factor p115	Uso1	1.41145	1.45041	0.973139	-0.0392828	0.231057	28	28	Q9Z1Z0;Q9Z1Z0-2;Q9Z1Z0-4;Q9Z1Z0-3
FK506-binding protein 15;Peptidyl-prolyl cis-trans isomerase	Fkbp15	1.28384	1.05266	1.21962	0.286426	0.231309	7	7	Q6P9Q6-2;Q6P9Q6;Q80YW9;Q80YW6;Q80YW7
Ribonuclease H2 subunit B	Rnaseh2b	0.159908	0.211994	0.754304	-0.406781	0.231358	3	3	Q80ZV0;F6WF94
Prohibitin	Phb	1.22789	1.27713	0.961445	-0.0567241	0.231918	10	10	P67778;Q5SQG5
Glia maturation factor beta	Gmfb	0.647641	0.674949	0.959541	-0.0595842	0.233085	5	5	Q9CQI3;A7VJA4;Q9ERL7;D3YY16;D3Z2F6;D3YY93
Abhydrolase domain-containing protein 15	Abhd15	1.26548	1.40606	0.900018	-0.151973	0.233428	3	3	B6DQM2;Q5F2F2;F7C9J3
Arginyl-tRNA--protein transferase 1	Ate1	0.989191	1.23166	0.803136	-0.316283	0.233595	3	3	Q9Z2A5;Q4FCQ7;Q80YP1;Q9Z2A5-2
Myristoylated alanine-rich C-kinase substrate	Marcks	1.17137	2.0453	0.572713	-0.804116	0.234351	2	2	P26645
Interleukin enhancer-binding factor 3	Ilf3	0.895895	0.944856	0.948182	-0.0767648	0.234495	19	16	Q9Z1X4-3;Q9Z1X4;Q9Z1X4-2;F6UW33;Q45VK5
Ras-related protein Rab-5A	Rab5a	1.12675	1.20901	0.931961	-0.101659	0.234655	6	3	Q4VAA1;Q9CQD1
Heterogeneous nuclear ribonucleoprotein U	Hnrnpu	0.681021	0.648553	1.05006	0.0704748	0.235616	29	29	Q8VEK3;G3XA10
ATP-binding cassette sub-family B member 10, mitochondrial	Abcb10	3.70407	2.38917	1.55036	0.632602	0.235982	7	7	Q9JI39
Homeobox protein Nkx-6.1;Homeobox protein Nkx-6.3	Nkx6-1;Nkx6-2;Nkx6-3	2.1668	1.30683	1.65806	0.729495	0.237223	3	3	Q99MA9;D3Z4R4;B2RU70;Q3UHX8
Nucleophosmin	Npm1	0.638816	0.576476	1.10814	0.14814	0.238292	8	3	Q5SQB7;Q61937;Q5SQB5;Q9DAY9;Q5SQB0
IgE-binding protein	Iap	0.44257	0.258362	1.71298	0.776512	0.238432	9	8	P03975
Bile salt-activated lipase	Cel	5.11753	6.47094	0.790848	-0.338528	0.240385	13	13	Q3V2H7;Q64285
RAD50-interacting protein 1	Rint1	1.22579	1.08162	1.13329	0.180518	0.240622	4	4	Q8BZ36;Q8BZ36-2
Cysteine-rich with EGF-like domain protein 1	Creld1	0.396958	0.706515	0.561854	-0.831734	0.240965	3	3	A8C1T7;Q91XD7
NADH-ubiquinone oxidoreductase chain 1	Mtnd1	1.29557	1.3727	0.943811	-0.0834294	0.241265	4	4	P03888
Pre-mRNA-processing factor 19	Prpf19	0.544763	0.512332	1.0633	0.0885497	0.241582	10	10	Q4ADG5;Q99KP6-2;Q99KP6;Q99KP6-3
Apolipoprotein O	Apoo	1.11675	1.18872	0.939456	-0.0901027	0.241809	4	4	Q9DCZ4;B1ASQ2;Q9D186
LanC-like protein 1	Lancl1	0.717879	0.770829	0.931308	-0.10267	0.243449	2	2	O89112;B2KGR2
Coproporphyrinogen-III oxidase, mitochondrial	Cpox	2.60174	2.25744	1.15252	0.204789	0.24415	5	5	P36552
Bifunctional polynucleotide phosphatase/kinase;Polynucleotide 3-phosphatase;Polynucleotide 5-hydroxyl-kinase	Pnkp	0.545435	0.663544	0.822003	-0.282785	0.244218	4	4	G5E8N7;Q9JLV6;E9QML1;Q9JLV6-2;E9Q9A5
Glycylpeptide N-tetradecanoyltransferase 1;Glycylpeptide N-tetradecanoyltransferase	Nmt1	1.00597	0.947803	1.06137	0.0859281	0.244458	4	4	O70310;Q3UJC3
ADP-sugar pyrophosphatase	Nudt5	0.634807	0.558892	1.13583	0.183749	0.244564	9	9	Q9JKX6;A2ATT5
Ubiquitin-like modifier-activating enzyme 6	Uba6	0.888659	0.96178	0.923973	-0.114077	0.245609	14	14	Q8C7R4;D3Z061
Dolichol-phosphate mannosyltransferase	Dpm1	1.72062	1.65439	1.04003	0.0566291	0.245613	9	9	A2BDX1;O70152;A2BDX2;F8WII3
Lupus La protein homolog	Ssb	0.617969	0.569077	1.08591	0.118911	0.245696	18	18	P32067;Q564E6;F8WHY1;A2AR07;F6SXM5;D6RI87
SRSF protein kinase 2;SRSF protein kinase 2 N-terminal;SRSF protein kinase 2 C-terminal	Srpk2	0.764984	0.889965	0.859566	-0.218319	0.245711	5	3	O54781;Q0VAW8;Q9Z0G2;E9Q5S4;Q6P5E1
Chymotrypsinogen B;Chymotrypsin B chain A;Chymotrypsin B chain B;Chymotrypsin B chain C	Ctrb1	6.73909	8.71958	0.772869	-0.371705	0.245793	5	5	Q9CR35
Active breakpoint cluster region-related protein	Abr	1.08931	1.02608	1.06162	0.0862714	0.246577	6	5	Q5SSL4-2;Q5SSL4;Q5SSL4-4;E9PUE7;Q5SSL4-3;H3BKV6;H3BJY3
Carboxypeptidase A1	Cpa1	5.94064	9.01068	0.659289	-0.601018	0.24689	9	8	Q7TPZ8;CON__Q2KIG3
Cutaneous T-cell lymphoma-associated antigen 5 homolog	Ctage5	1.55375	1.47936	1.05029	0.0707812	0.246965	19	19	H3BJS0;H3BKH2;E9PY90;E9Q3S2;H3BK48;Q8R311;E9QN50;H3BK44;H3BJI6;H3BL19;H3BKL6;H3BJ71;H3BJS5;H3BJ35;H3BJY7
60S ribosomal protein L13a	Rpl13a;Rpl13a-ps1	0.690736	0.754285	0.915749	-0.126975	0.246981	9	9	P19253;Q5M9M0;E9Q5A0;D3YY61;Q3TDS9
High mobility group nucleosome-binding domain-containing protein 3	Hmgn3	1.97327	3.50688	0.562685	-0.8296	0.247205	2	2	Q9DCB1;E9QMW7;Q9DCB1-3;Q9DCB1-2
C1GALT1-specific chaperone 1	C1galt1c1	1.41815	3.7564	0.377529	-1.40534	0.247214	3	3	Q9JMG2
Chromobox protein homolog 5	Cbx5	0.289862	0.258315	1.12213	0.166235	0.247496	7	6	Q61686;D3Z0U2
SUMO-activating enzyme subunit 2	Uba2	0.745648	0.625089	1.19287	0.254433	0.24755	6	6	A2BH28;Q9Z1F9;H3BLR3;H3BLM2
ATP-citrate synthase	Acly	0.518493	0.539284	0.961447	-0.0567207	0.247748	60	60	Q3V117;A2A4H2;Q91V92;Q3TS02
T-complex protein 1 subunit delta	Cct4	0.73433	0.75922	0.967216	-0.0480895	0.248439	22	22	P80315;Q564F4;G5E839;G3UYW5;G3UXG2;G3UXF3
NAD(P)H-hydrate epimerase	Apoa1bp	1.82189	1.67201	1.08964	0.123852	0.248602	3	3	Q8K4Z3
Alpha-1,6-mannosyl-glycoprotein 2-beta-N-acetylglucosaminyltransferase	Mgat2	1.35788	1.0827	1.25416	0.326722	0.248663	5	5	Q921V5
Polypyrimidine tract-binding protein 1	Ptbp1	1.03073	0.967796	1.06503	0.0908916	0.249345	11	10	Q922I7;Q8BGJ5;E9Q4L8;Q8CB58;P17225;E9QMW9;Q8C2R5;F7AXP1;F7DCW4;E9Q279;F7C521;E9Q0W3
Malate dehydrogenase, mitochondrial	Mdh2	1.30157	1.34573	0.967185	-0.0481361	0.249348	19	19	P08249
Probable cation-transporting ATPase 13A1	Atp13a1	0.853723	0.944376	0.904008	-0.145593	0.249438	20	20	Q9EPE9;E9PZQ3
Elongation factor 1-beta	Eef1b	0.71166	0.678211	1.04932	0.069454	0.249769	5	5	O70251;G3UZ47;G3UX43
Myelin basic protein	Mbp	3.78153	8.24977	0.45838	-1.12538	0.25007	8	8	F6RT34;P04370-4;F6VME3;P04370-10;P04370-5;F7A0B0;P04370-9;P04370-7;F6ZIA4;P04370;F6TYB7;P04370-11;P04370-6;Q542T4;F6RWW8;P04370-13;P04370-8;P04370-14;P04370-2;Q5D096
Cytochrome b5	Cyb5a;Cyb5	6.10365	7.23308	0.843852	-0.244938	0.250108	4	4	P56395;Q544Z9;G5E850;E0CY88
Copper chaperone for superoxide dismutase	Ccs	1.68241	1.5993	1.05197	0.0730887	0.250199	2	2	Q543K2;Q9WU84
Rab GDP dissociation inhibitor beta	Gdi2	0.946318	0.990789	0.955116	-0.0662528	0.251161	28	22	Q61598;Q61598-2
Structural maintenance of chromosomes protein 3	Smc3	0.668319	0.617731	1.08189	0.113558	0.25192	25	25	E9Q762;Q1HL32;Q9CW03
Striatin-3	Strn3	0.926457	0.862122	1.07462	0.103832	0.252874	7	4	Q9ERG2;B2RQS1;B3STQ1
Hypoxia up-regulated protein 1	Hyou1	1.6904	1.78477	0.947125	-0.0783735	0.253093	42	42	Q9JKR6;F6TRP3;E0CYZ2
Microtubule-associated protein 2	Map2	1.01303	1.12275	0.902276	-0.14836	0.253213	16	10	P20357;Q80ZL4;Q80X35;G3UZK9;G3UZE9;G3UZJ2;F7ALC8;E9Q8Y2;G3UXY3
Lysosomal protective protein;Lysosomal protective protein 32 kDa chain;Lysosomal protective protein 20 kDa chain	Ctsa	1.24479	1.16692	1.06673	0.0931967	0.253234	9	9	G3X8T3;P16675;Q544R6;A2A5J8;A2A5J9;A2A5J6
Apoptotic chromatin condensation inducer in the nucleus	Acin1	0.850102	0.746454	1.13885	0.187583	0.253383	13	13	Q9JIX8;Q9JIX8-4;F6RJ39;B8JJ91;B8JJ93;Q9JIX8-2;B8JJ92;B8JJ95;Q9JIX8-3;Q52KR6;B8JJ89;B8JJ90;F6Q8C0
Src substrate cortactin	Cttn	0.915465	0.949904	0.963745	-0.053277	0.2539	17	17	Q60598;Q921L6
Erlin-2	Erlin2	1.22978	1.30363	0.94335	-0.0841342	0.254508	12	10	Q8BFZ9;E9PUH5
Exportin-4	Xpo4	0.71251	0.754163	0.944769	-0.0819661	0.255186	6	6	Q9ESJ0;G3UX04
Selenocysteine lyase	Scly	0.520558	0.487938	1.06685	0.0933611	0.25588	12	12	Q9JLI6;Q9JLI6-2;F6ZFP8;F7D651;D3Z7G6;F7BB44;D3Z3I6
GTPase-activating protein and VPS9 domain-containing protein 1	Gapvd1	0.992499	0.784193	1.26563	0.339857	0.256196	5	5	Q6PAR5-4;Q6PAR5;Q6PAR5-6;Q6PAR5-2;Q6PAR5-5;F7ADQ2;F7ADT6;Q6PAR5-3;F6X819;F7ADS7;E9Q0D1;F6UFP6
DNA replication licensing factor MCM3	Mcm3	0.118766	0.109338	1.08623	0.119327	0.256389	24	24	P25206;Q3UI57
Protein phosphatase 1 regulatory subunit 11	Ppp1r11	2.04266	1.04978	1.9458	0.960362	0.256408	3	3	A5A4Y9;Q8K1L5;G3UZ30
Protein FAM98A	Fam98a	0.750793	0.79489	0.944524	-0.08234	0.257453	4	3	B8JJG1;Q3TJZ6
Heat shock 70 kDa protein 13	Hspa13	1.39711	1.46446	0.95401	-0.0679232	0.25763	7	7	Q8BM72;D3Z0Y0;Q8BM72-2
	Fubp3	0.825866	0.652276	1.26613	0.340425	0.257776	8	7	Q3TIX6;A2AJ72;A2AJ71;F7AM43;F6S444
	Sf3b2	0.749975	0.704169	1.06505	0.0909208	0.25782	14	14	Q3UJB0
Synapsin-1	Syn1	0.702433	0.902697	0.778149	-0.361881	0.258429	11	10	O88935;A2AE14;O88935-1;O88935-3
Plastin-2	Lcp1	2.95343	1.52442	1.93741	0.954131	0.258693	10	8	Q61233;D3Z311;D3Z7D9;D3YVW8;D3YZ25
COP9 signalosome complex subunit 1	Gps1	0.962095	0.901382	1.06736	0.0940407	0.25891	8	8	G3UXW9;B1ATU4;Q3MIA8;Q99LD4-2;Q99LD4
UDP-glucuronosyltransferase 1-6	Ugt1a6;Ugt1a6a;Ugt1a6b	1.15068	1.5396	0.747389	-0.420069	0.258945	7	5	Q64435;Q8R0P3;E9PXN8
Methylmalonate-semialdehyde dehydrogenase [acylating], mitochondrial	Aldh6a1	4.03487	4.58491	0.880033	-0.184371	0.259321	12	12	Q9EQ20;Q8K0L1
Nucleolysin TIAR;Nucleolysin TIA-1	Tial1;Tia1	0.923631	0.780234	1.18379	0.24341	0.259323	6	6	Q921W2;P70318;Q545C1;P52912;Q564E7;D3Z4H6;Q80ZW7;G5E8L2;Q8CII5;D6RGU1;D3YY02;D3Z3Y4
mRNA cap guanine-N7 methyltransferase	Rnmt	0.597242	0.930247	0.642025	-0.639298	0.260963	3	3	Q9D0L8;Q9D0L8-2;Q9D0L8-3;D3YYS7;D3Z478
Arginase-1	Arg1	12.4705	6.56908	1.89836	0.924756	0.261282	10	10	Q61176
	Cad	0.924936	0.877303	1.05429	0.0762783	0.261309	38	37	B2RQC6;E9QAI5;G3UWN2;B7ZN27;E9QAT6;F6S3Z3
Guanine nucleotide-binding protein G(I)/G(S)/G(T) subunit beta-2	Gnb2	1.43289	1.3068	1.09649	0.13289	0.261657	9	4	E9QKR0;P62880;Q3U9V4;D3Z1M1;D3YZX3;D3Z1T4;P29387;E9PWM7
Heme oxygenase 2	Hmox2	0.730273	0.788203	0.926504	-0.110131	0.261952	6	6	O70252;Q544R7;D3YX62;D3YXN4;D3Z4A2
E3 ubiquitin-protein ligase HECTD1	Hectd1	2.21415	1.67126	1.32484	0.405817	0.263089	3	3	Q69ZR2;F8WIE5
Plectin	Plec	2.77259	2.36912	1.1703	0.226883	0.263666	25	24	E9QN87;Q9QXS1;E9QPE8;Q9QXS1-2;E9QK43;Q9QXS1-8;Q9QXS1-7;Q9QXS1-6;E9QQ00;Q9QXS1-14;E9QL05;Q9QXS1-4;Q9QXS1-16;E9PY96;E9QMZ5;Q9QXS1-3;Q9QXS1-5;E9QLJ5;Q9QXS1-13;Q9QXS1-11;E9QKX4;Q9QXS1-12;Q9QXS1-9;E9Q153;Q9QXS1-10;E9QK01;Q9QXS1-15;E9Q3W4;F6R059;E9Q9J6;E9PW24
Eukaryotic translation initiation factor 3 subunit I	Eif3i	1.0382	1.00121	1.03695	0.0523398	0.263965	10	10	A2AE04;Q9QZD9;A2AE03
Brefeldin A-inhibited guanine nucleotide-exchange protein 3	Arfgef3	1.34564	1.23745	1.08743	0.120922	0.264077	15	15	Q3UGY8
DnaJ homolog subfamily C member 11	Dnajc11	0.948814	1.19614	0.79323	-0.334189	0.264115	3	3	Q5U458;E9Q8B3;A2A8D1
Propionyl-CoA carboxylase alpha chain, mitochondrial	Pcca	3.98188	4.29074	0.928017	-0.107777	0.264951	21	21	Q3UGC8;Q91ZA3;H3BL62;D3YWM4;D3YZC0
Spectrin beta chain, brain 1	Sptbn1	1.60135	1.70534	0.939021	-0.0907707	0.265014	69	65	Q62261;Q62261-2;Q3UGX2;E9Q397;E9Q5I4;P15508
Protein phosphatase 1G	Ppm1g	0.690046	0.639641	1.0788	0.10943	0.265022	10	10	Q61074
Sphingosine-1-phosphate lyase 1	Sgpl1	1.06639	0.991407	1.07563	0.105186	0.266111	13	13	Q8R0X7;D6REF7;D3YZT4
U1 small nuclear ribonucleoprotein A	Snrpa	1.0339	0.974737	1.0607	0.0850117	0.266927	9	8	Q62189;D3Z0S6;E9Q4T6;D6RI83;F8VQ88
Protein DEK	Dek	0.403587	0.36803	1.09661	0.133056	0.269111	8	8	Q7TNV0;D3YVJ6;E9Q8P4;E9Q8Y1
Serine/arginine-rich splicing factor 7	Srsf7	1.0282	0.940213	1.09358	0.129061	0.269446	7	6	Q8BL97;F8WH59;Q3THA6;Q8BL97-2;Q8BL97-4;Q8BL97-3
60S ribosomal protein L5	Rpl5	0.99032	0.943988	1.04908	0.0691263	0.269801	15	15	P47962;Q58EU6;D3YYV8
	Lmo7	0.87893	0.944256	0.930817	-0.10343	0.269873	5	5	F6TFN2;B7ZN52;E9PYP5;E9PYF4;F6VG99;E9PYI7
Collagen alpha-1(VI) chain	Col6a1	11.3502	12.6803	0.895105	-0.159871	0.269934	13	13	Q04857;E9Q7R6;E9Q3C7
NAD(P)H dehydrogenase [quinone] 1	Nqo1	0.534916	0.378672	1.41261	0.498364	0.269958	3	3	Q542Y0;Q64669
Seizure 6-like protein 2	Sez6l2	1.40218	1.27569	1.09915	0.136394	0.270454	3	3	Q4V9Z5-2;Q4V9Z5;Q4V9Z5-3
Translation initiation factor eIF-2B subunit beta	Eif2b2	1.22836	1.13132	1.08578	0.118726	0.270464	5	5	Q99LD9;D3Z487;D3Z7J6
Translin-associated protein X	Tsnax	0.805811	0.74615	1.07996	0.110976	0.271028	6	6	Q9QZE7
ES1 protein homolog, mitochondrial	D10Jhu81e	3.19934	2.9978	1.06723	0.0938702	0.271866	5	5	Q9D172
	Farp1	2.54899	2.08088	1.22496	0.292732	0.272451	5	5	F8VPU2;E9Q805
Trafficking protein particle complex subunit 11	Trappc11	0.867148	0.802216	1.08094	0.112288	0.272581	5	5	B2RXC1
Ubiquilin-2	Ubqln2	1.10054	1.06327	1.03505	0.0497036	0.272583	10	7	Q9QZM0
Equilibrative nucleoside transporter 1	Slc29a1	1.06817	1.32946	0.803462	-0.315699	0.272598	3	3	Q9JIM1;Q3TCZ2;Q9JIM1-2;E9PXM6;E9PWY7;E9PXQ6;E9PVH9;E9PZV0;E9PWD6;E9Q3D1;E9Q503;E9Q221
Pleiotropic regulator 1	Plrg1	0.666625	0.724219	0.920474	-0.119551	0.27268	7	7	Q922V4;D3Z4V1;F8WI31
Caseinolytic peptidase B protein homolog	Clpb	1.3972	1.26829	1.10164	0.139654	0.273031	4	4	E9PY58;Q8CCN6;Q3URM1;Q60649
NHL repeat-containing protein 2	Nhlrc2	0.921492	1.01045	0.911962	-0.132954	0.273195	5	5	F6ZR71;B2RR26;Q8BZW8
Protein arginine N-methyltransferase 1	Prmt1	0.715991	0.656728	1.09024	0.124645	0.273483	14	14	Q9JIF0;Q80WV6;Q3UIG8;Q9JIF0-2;Q9JIF0-3;D3Z0A2;F8WH01;Q3TPF5;D3Z3N0;Q9CX58;Q6PAK3
Cleavage and polyadenylation specificity factor subunit 3	Cpsf3	0.918657	0.845325	1.08675	0.12002	0.273631	5	5	Q9QXK7
	Gm3662;Gm2783;Gm17672;Gm4511;Gm17462	0.41012	0.232065	1.76726	0.821517	0.273737	5	4	E9Q1I0;E9QAJ3;E9Q3N6;E9Q0Y0;E9Q212;E9Q5Q7
Lamin-B1	Lmnb1	0.870488	0.808298	1.07694	0.106937	0.274136	36	32	P14733
Guanine nucleotide-binding protein G(I)/G(S)/G(O) subunit gamma-12	Gng12	0.945389	0.809412	1.16799	0.224034	0.274358	5	5	Q9DAS9
Aspartate--tRNA ligase, cytoplasmic	Dars	0.897688	0.873385	1.02783	0.0395964	0.27445	25	25	Q922B2;Q8BJY7
A-kinase anchor protein 9	Akap9	1.22525	1.45364	0.842884	-0.246594	0.27461	8	8	Q70FJ1;E9QQ10;Q70FJ1-2;Q70FJ1-3;F6V1W5
Uridine 5-monophosphate synthase;Orotate phosphoribosyltransferase;Orotidine 5-phosphate decarboxylase	Umps	0.645489	0.618249	1.04406	0.0622045	0.275163	13	13	P13439;Q544K9;D6RJ62
Enoyl-CoA hydratase, mitochondrial	Echs1	2.20615	2.29754	0.960223	-0.0585591	0.275401	9	9	Q8BH95;F6T930
Cytochrome b	Mt-Cyb;mt-Cytb	1.56561	1.17202	1.33582	0.417728	0.275816	2	2	P00158;Q7JCZ3
ATP synthase subunit e, mitochondrial	Atp5i;Atp5k	1.50877	1.55319	0.971401	-0.0418614	0.275846	5	5	Q06185;Q8BTB6
Nuclear pore complex protein Nup214	Nup214	0.841209	0.781486	1.07642	0.106244	0.276238	5	5	Q80U93;Q8CHS9
Cingulin	Cgn	1.27033	1.4117	0.899858	-0.15223	0.276887	6	6	E9QMC1;P59242;D3YUW7;P59242-2;E9Q611
Latexin	Lxn	1.57831	1.40538	1.12305	0.16742	0.278172	2	2	P70202;Q14BZ3
GDP-mannose 4,6 dehydratase	Gmds	1.03168	0.96025	1.07439	0.103514	0.278293	9	9	Q8K0C9
Lamina-associated polypeptide 2, isoforms alpha/zeta	Tmpo	0.65085	0.522379	1.24593	0.317228	0.278581	12	5	Q61033;Q61033-2
Ras GTPase-activating protein-binding protein 2	G3bp2	0.977642	1.07201	0.911971	-0.13294	0.27903	7	6	P97379;Q3U541;P97379-2;Q542W3
CLIP-associating protein 2	Clasp2	0.708887	0.75083	0.944138	-0.0829306	0.279209	12	8	E9QB05;Q08EB5;Q08EB6;E9Q8N5;Q8BRT1;B9EJA4;E9QQ37;Q8BRT1-5;Q8BSE7;Q8BRT1-6
26S protease regulatory subunit 8	Psmc5	1.07707	1.00255	1.07433	0.103438	0.279816	16	16	B1ARK2;P62196;E9Q0L5
Transcription factor BTF3 homolog 4	Btf3l4	1.19464	1.0673	1.11931	0.16261	0.280223	2	2	A2A7Z4;Q9CQH7
WD repeat-containing protein 1	Wdr1	1.50782	1.37501	1.09659	0.133022	0.280284	19	19	O88342;Q3TJY2
Ribosomal protein S6 kinase alpha-3	Rps6ka3	1.01134	0.916344	1.10367	0.142307	0.280487	9	7	P18654;B1AXN9;E9QAP2
U4/U6 small nuclear ribonucleoprotein Prp4	Prpf4	0.721936	0.65831	1.09665	0.133104	0.280666	8	8	Q059T9;Q9DAW6
Ras-related protein Rab-2A	Rab2a	1.84064	1.88957	0.974105	-0.0378505	0.280993	15	9	P53994;Q0PD65
NADH dehydrogenase [ubiquinone] 1 alpha subcomplex subunit 11	Ndufa11	1.94243	1.85341	1.04803	0.0676805	0.28118	3	3	G5E814;Q9D8B4
Proline-, glutamic acid- and leucine-rich protein 1	Pelp1	1.12053	0.861994	1.29993	0.378432	0.281829	2	2	Q9DBD5
Target of Myb protein 1	Tom1	1.37234	1.43525	0.956168	-0.0646641	0.281956	8	8	Q3UDC3;O88746;Q561M4;O88746-2
Synaptotagmin-13	Syt13	1.77896	1.91097	0.93092	-0.103271	0.282078	6	6	A2AGX5;Q9EQT6
Arginine--tRNA ligase, cytoplasmic	Rars	0.767029	0.744467	1.03031	0.0430732	0.282445	24	24	Q9D0I9
E3 UFM1-protein ligase 1	Ufl1	2.00494	1.92097	1.04371	0.0617241	0.282897	14	14	Q8CCJ3;Q8CCJ3-1;Q8CCJ3-2
Chromobox protein homolog 3	Cbx3	0.460659	0.415029	1.10994	0.150487	0.283808	7	5	P23198;Q9DCC5;D3YV86;D3Z313;D3Z1A9
Conserved oligomeric Golgi complex subunit 7	Cog7	1.562	1.6983	0.919743	-0.120697	0.2847	8	8	Q3UM29;Q3TR20
Pescadillo homolog	Pes1	0.729118	0.593347	1.22882	0.297276	0.284979	2	2	Q5SQ20;Q9EQ61
Mesencephalic astrocyte-derived neurotrophic factor	Manf	1.35478	1.41499	0.957448	-0.0627333	0.28597	16	16	Q3TMX5;Q80ZP8;Q9CXI5;E0CXA8;F6T4L3;F6USD5;F7C1S6
NADH dehydrogenase [ubiquinone] 1 beta subcomplex subunit 8, mitochondrial	Ndufb8	2.07284	1.83041	1.13245	0.179442	0.286194	6	6	Q9D6J5;Q3V406;E9Q9J5;F6VCY0;F6Z9R1
	Golgb1	1.59926	1.55226	1.03028	0.0430343	0.286332	49	49	E9PVZ8;E9QAH1;B7ZNF9
Platelet-activating factor acetylhydrolase IB subunit alpha	Pafah1b1	0.867649	0.827944	1.04796	0.0675783	0.286407	13	13	P63005;Q5SW18;P63005-2;Q5SW16
[truncated: 1,367 more rows]

## Sheet: Supp Table S5
Table S5
Ingenuity enrichment analysis for disease and functions, based on the SILAC dataset
[truncated: 502 more rows]

## Sheet: Supp Table S6
Table S6
[truncated: 311 more rows]

[truncated: 3 more sheets: Supp Table S7, Supp Table S8, Supp Table S9]
